# Supplementary material for: Radical cations and dications of bis[1]benzothieno[1,4]thiazine isomers
Source: Royal Society of Chemistry journal article supplement (doi:10.1039/d1qo00867f), 2021-01-01
Supplement: d1qo00867f1.pdf [file d1qo00867f1.pdf]

Supporting Information

**Radical cations and dications of bis[1]benzothieno[1,4]thiazine isomers**

Simone T. Hauer,<sup>a</sup> Arno P. W. Schneeweis,<sup>a</sup> Sven D. Waniek,<sup>b</sup> Lukas P. Sorge,<sup>b</sup> Katja Heinze,<sup>b</sup> and Thomas J. J. Müller\*,<sup>a</sup>

<sup>a</sup>Institut für Organische Chemie und Makromolekulare Chemie, Heinrich-Heine-Universität Düsseldorf, Universitätsstraße 1, D-40225 Düsseldorf, Germany. E-Mail: ThomasJJ.Mueller@hhu.de

<sup>b</sup>Department of Chemistry, Johannes Gutenberg University Mainz, Duesbergweg 10-14, D-55128 Mainz, Germany.

## Table of contents

|                                                                                                                                                                                       |    |
|---------------------------------------------------------------------------------------------------------------------------------------------------------------------------------------|----|
| Radical cations and dications of bis[1]benzothieno[1,4]thiazine isomers .....                                                                                                         | 1  |
| 1 Starting Materials .....                                                                                                                                                            | 1  |
| 2 <sup>1</sup> H and <sup>19</sup> F NMR Spectra .....                                                                                                                                | 2  |
| 2.1 <i>N</i> -(4-Fluorophenyl)bis[1]benzothieno[2,3- <i>b</i> :3',2'- <i>e</i> ][1,4]thiazine ( <b>5</b> ).....                                                                       | 2  |
| 2.2 <i>N</i> -(4-Fluorophenyl)bis[1]benzothieno[2,3- <i>b</i> :2',3'- <i>e</i> ][1,4]-thiazine ( <b>6</b> ).....                                                                      | 3  |
| 2.3 <i>N</i> -(4-Fluorophenyl)bis[1]benzothieno[3,2- <i>b</i> :2',3'- <i>e</i> ][1,4]thiazine ( <b>7</b> ).....                                                                       | 4  |
| 2.4 Hexachloroantimonate salt of <b>5</b> <sup>2+</sup> .....                                                                                                                         | 5  |
| 2.5 Hexachloroantimonate salt of <b>6</b> <sup>2+</sup> .....                                                                                                                         | 6  |
| 2.6 Hexachloroantimonate salt of <b>7</b> <sup>2+</sup> .....                                                                                                                         | 7  |
| 3 Simulated and experimental EPR-spectra of hexachloroantimonate radical cation salts of <b>5</b> <sup>•+</sup> , <b>6</b> <sup>•+</sup> , and <b>7</b> <sup>•+</sup> .....           | 8  |
| 4 Spectroelectrochemical data of <i>N-p</i> -fluorophenyl-BBTT regioisomers .....                                                                                                     | 9  |
| 5 Spectral data of hexachloroantimonate radical cation salts of <b>5</b> <sup>•+</sup> , <b>6</b> <sup>•+</sup> , and <b>7</b> <sup>•+</sup> .....                                    | 17 |
| 6 Data of Quantum Chemical Calculations <sup>[5]</sup> .....                                                                                                                          | 18 |
| 6.1 Computed molecular orbital transitions of reduced compounds, radical cations and dications (uB3LYP/6-311++G**, IEFPCM CH <sub>2</sub> Cl <sub>2</sub> ).....                      | 18 |
| 6.2 Computed zyx-coordinates of the S <sub>0</sub> state of compound <b>5</b> and excitation energies (B3LYP/6-311++G**, IEFPCM CH <sub>2</sub> Cl <sub>2</sub> ).....                | 21 |
| 6.3 Computed zyx-coordinates of the S <sub>0</sub> state of compound <b>6</b> and excitation energies (B3LYP/6-311++G**, IEFPCM CH <sub>2</sub> Cl <sub>2</sub> ).....                | 28 |
| 6.4 Computed zyx-coordinates of the S <sub>0</sub> state of compound <b>7</b> and excitation energies (B3LYP/6-311++G**, IEFPCM CH <sub>2</sub> Cl <sub>2</sub> ).....                | 38 |
| 6.5 Computed zyx-coordinates of the D <sub>0</sub> state of compound <b>5</b> <sup>•+</sup> and excitation energies (uB3LYP/6-311++G**, IEFPCM CH <sub>2</sub> Cl <sub>2</sub> )..... | 45 |

|      |                                                                                                                                                                                                |     |
|------|------------------------------------------------------------------------------------------------------------------------------------------------------------------------------------------------|-----|
| 6.6  | Computed zyx-coordinates of the D <sub>0</sub> state of compound <b>6</b> <sup>••</sup> and excitation energies (uB3LYP/6-311++G <sup>**</sup> , IEFPCM CH <sub>2</sub> Cl <sub>2</sub> )..... | 62  |
| 6.7  | Computed zyx-coordinates of the D <sub>0</sub> state of compound <b>7</b> <sup>••</sup> and excitation energies (uB3LYP/6-311++G <sup>**</sup> , IEFPCM CH <sub>2</sub> Cl <sub>2</sub> )..... | 83  |
| 6.8  | Computed zyx-coordinates of the S <sub>0</sub> state of compound <b>5</b> <sup>2+</sup> and excitation energies (uB3LYP/6-311++G <sup>**</sup> , IEFPCM CH <sub>2</sub> Cl <sub>2</sub> )..... | 99  |
| 6.9  | Computed zyx-coordinates of the S <sub>0</sub> state of compound <b>6</b> <sup>2+</sup> and excitation energies (uB3LYP/6-311++G <sup>**</sup> , IEFPCM CH <sub>2</sub> Cl <sub>2</sub> )..... | 114 |
| 6.10 | Computed zyx-coordinates of the S <sub>0</sub> state of compound <b>7</b> <sup>2+</sup> and excitation energies (uB3LYP/6-311++G <sup>**</sup> , IEFPCM CH <sub>2</sub> Cl <sub>2</sub> )..... | 129 |
| 6.11 | Computed xyz-coordinates of the T <sub>0</sub> state of compound <b>5</b> <sup>2+</sup> (uB3LYP/6-311++G <sup>**</sup> , IEFPCM CH <sub>2</sub> Cl <sub>2</sub> ).....                         | 142 |
| 6.12 | Computed xyz-coordinates of the T <sub>0</sub> state of compound <b>6</b> <sup>2+</sup> (uB3LYP/6-311++G <sup>**</sup> , IEFPCM CH <sub>2</sub> Cl <sub>2</sub> ).....                         | 144 |
| 6.13 | Computed xyz-coordinates of the T <sub>0</sub> state of compound <b>7</b> <sup>2+</sup> (uB3LYP/6-311++G <sup>**</sup> , IEFPCM CH <sub>2</sub> Cl <sub>2</sub> ).....                         | 145 |
| 6.14 | Mulliken atomic spin densities of <b>5</b> <sup>••</sup> (uB3LYP/6-311++G <sup>**</sup> , IEFPCM CH <sub>2</sub> Cl <sub>2</sub> ) .....                                                       | 146 |
| 6.15 | Mulliken atomic spin densities of <b>6</b> <sup>••</sup> (uB3LYP/6-311++G <sup>**</sup> , IEFPCM CH <sub>2</sub> Cl <sub>2</sub> ) .....                                                       | 148 |
| 6.16 | Mulliken atomic spin densities of <b>7</b> <sup>••</sup> (uB3LYP/6-311++G <sup>**</sup> , IEFPCM CH <sub>2</sub> Cl <sub>2</sub> ) .....                                                       | 149 |
| 6.17 | Wiberg bond orders - overview.....                                                                                                                                                             | 151 |
| 6.18 | Wiberg bond orders extracted of <b>5</b> extracted by multiwfn (B3LYP/6-311++G <sup>**</sup> , IEFPCM CH <sub>2</sub> Cl <sub>2</sub> ).....                                                   | 151 |
| 6.19 | Wiberg bond orders of <b>6</b> extracted by multiwfn (B3LYP/6-311++G <sup>**</sup> , IEFPCM CH <sub>2</sub> Cl <sub>2</sub> ) .....                                                            | 155 |
| 6.20 | Wiberg bond orders of <b>7</b> extracted by multiwfn (B3LYP/6-311++G <sup>**</sup> , IEFPCM CH <sub>2</sub> Cl <sub>2</sub> ) .....                                                            | 159 |
| 6.21 | Wiberg bond orders of <b>5</b> <sup>••</sup> extracted by multiwfn (B3LYP/6-311++G <sup>**</sup> , IEFPCM CH <sub>2</sub> Cl <sub>2</sub> ) .....                                              | 163 |
| 6.22 | Wiberg bond orders of <b>6</b> <sup>••</sup> extracted by multiwfn (B3LYP/6-311++G <sup>**</sup> , IEFPCM CH <sub>2</sub> Cl <sub>2</sub> ) .....                                              | 167 |
| 6.23 | Wiberg bond orders of <b>7</b> <sup>••</sup> extracted by multiwfn (B3LYP/6-311++G <sup>**</sup> , IEFPCM CH <sub>2</sub> Cl <sub>2</sub> ) .....                                              | 172 |

|      |                                                                                                                                                                        |     |
|------|------------------------------------------------------------------------------------------------------------------------------------------------------------------------|-----|
| 6.24 | Computed xyz-coordinates and GIAO nuclear magnetic shielding tensors of NICS(0) calculation of compound $5^{2+}$ (Bq = ghost atom, B3LYP/6-311+G <sup>**</sup> ).....  | 176 |
| 6.25 | Computed xyz-coordinates and GIAO nuclear magnetic shielding tensors of NICS(1) calculation of compound $5^{2+}$ (Bq = ghost atom, B3LYP/6-311+G <sup>**</sup> ).....  | 184 |
| 6.26 | Computed xyz-coordinates and GIAO nuclear magnetic shielding tensors of NICS(-1) calculation of compound $5^{2+}$ (Bq = ghost atom, B3LYP/6-311+G <sup>**</sup> )..... | 192 |
| 6.27 | Computed xyz-coordinates and GIAO nuclear magnetic shielding tensors of NICS(0) calculation of compound $6^{2+}$ (Bq = ghost atom, B3LYP/6-311+G <sup>**</sup> ).....  | 200 |
| 6.28 | Computed xyz-coordinates and GIAO nuclear magnetic shielding tensors of NICS(1) calculation of compound $6^{2+}$ (Bq = ghost atom, B3LYP/6-311+G <sup>**</sup> ).....  | 209 |
| 6.29 | Computed xyz-coordinates and GIAO nuclear magnetic shielding tensors of NICS(-1) calculation of compound $6^{2+}$ (Bq = ghost atom, B3LYP/6-311+G <sup>**</sup> )..... | 217 |
| 6.30 | Computed xyz-coordinates and GIAO nuclear magnetic shielding tensors of NICS(0) calculation of compound $7^{2+}$ (Bq = ghost atom, B3LYP/6-311+G <sup>**</sup> ).....  | 225 |
| 6.31 | Computed xyz-coordinates and GIAO nuclear magnetic shielding tensors of NICS(1) calculation of compound $7^{2+}$ (Bq = ghost atom, B3LYP/6-311+G <sup>**</sup> ).....  | 233 |
| 6.32 | Computed xyz-coordinates and GIAO nuclear magnetic shielding tensors of NICS(-1) calculation of compound $7^{2+}$ (Bq = ghost atom, B3LYP/6-311+G <sup>**</sup> )..... | 242 |
| 7    | References.....                                                                                                                                                        | 251 |

# 1 Starting Materials

All starting materials were prepared according to previously published literature.<sup>[1-4]</sup>

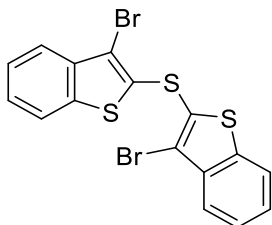

Figure S1: Bis(3-bromobenzo[*b*]thiophene-2-yl)sulfane (**1**).<sup>[1-4]</sup>

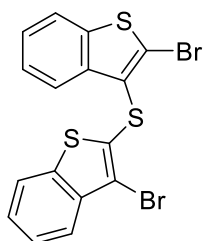

Figure S2: 2-Bromo-3-((3-bromobenzo[*b*]thiophen-2-yl)thio)benzo[*b*]thiophene (**2**).<sup>[1-4]</sup>

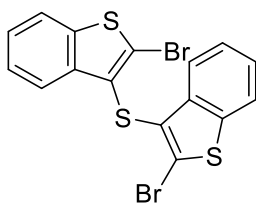

Figure S3: Bis(2-bromobenzo[*b*]thiophen-3-yl)sulfane (**3**).<sup>[1-4]</sup>

## 2 $^1\text{H}$ and $^{19}\text{F}$ NMR Spectra

### 2.1 *N*-(4-Fluorophenyl)bis[1]benzothieno[2,3-*b*:3',2'-*e*][1,4]thiazine (**5**)

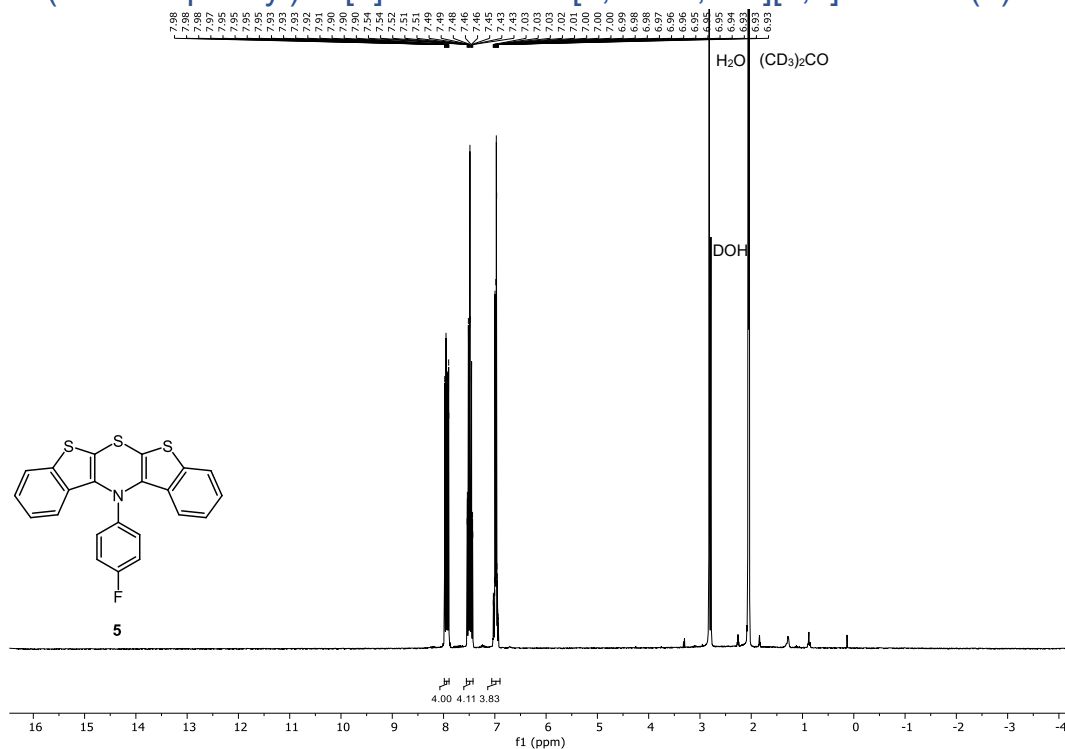

Figure S4:  $^1\text{H}$  NMR spectrum of *N*-(4-fluorophenyl)bis[1]benzothieno[2,3-*b*:3',2'-*e*][1,4]thiazine (**5**) (300 MHz,  $\text{acetone-}d_6$ ,  $T = 298$  K).

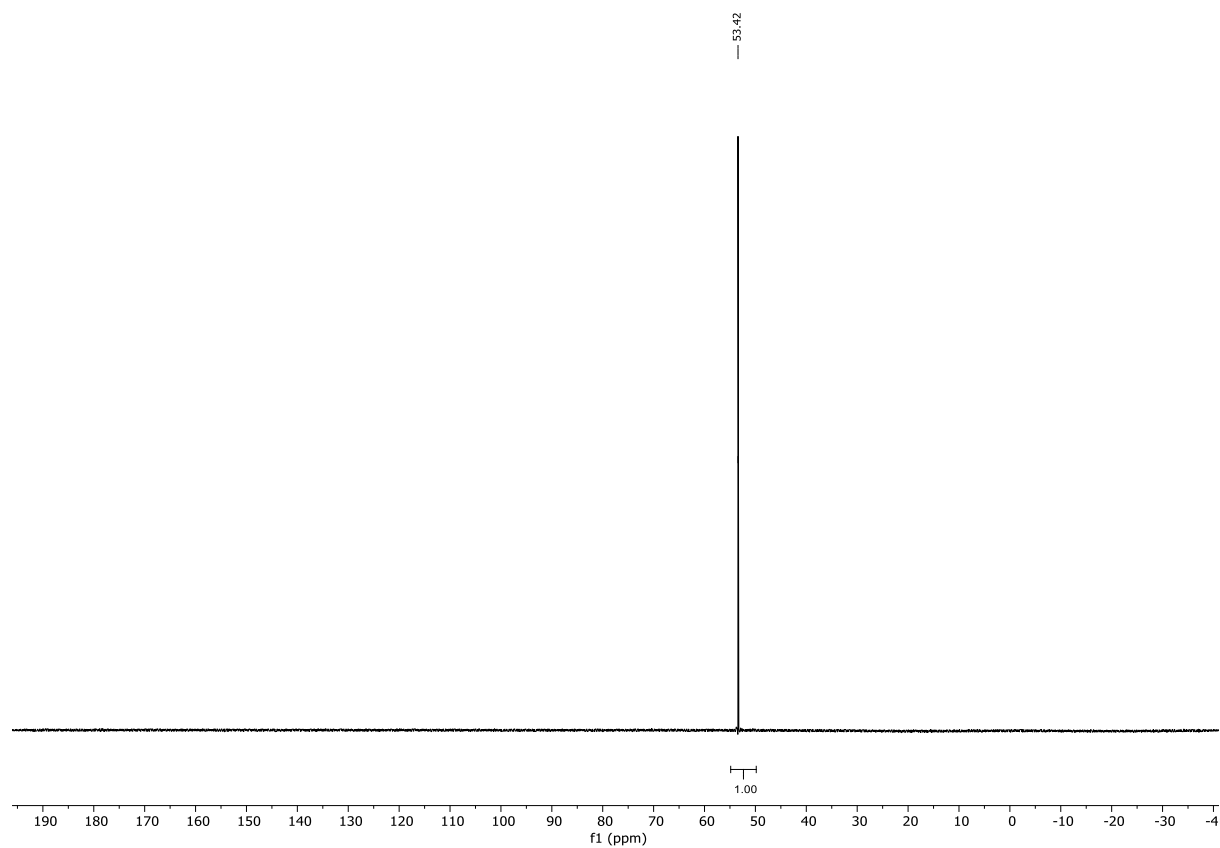

Figure S5:  $^{19}\text{F}$  NMR spectrum of *N*-(4-fluorophenyl)bis[1]benzothieno[2,3-*b*:3',2'-*e*][1,4]thiazine (**5**) (282 MHz,  $\text{acetone-}d_6$ ,  $T = 298$  K).

## 2.2 *N*-(4-Fluorophenyl)bis[1]benzothieno[2,3-*b*:2',3'-*e*][1,4]-thiazine (**6**)

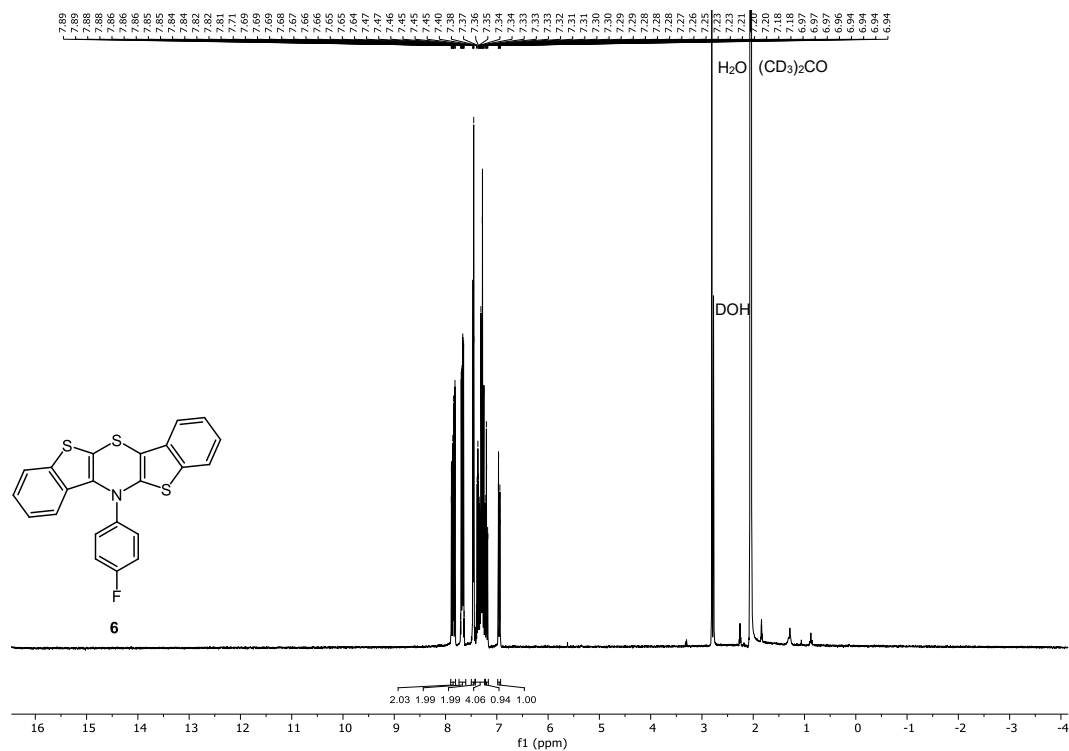

Figure S6: <sup>1</sup>H NMR spectrum of *N*-(4-fluorophenyl)bis[1]benzothieno[2,3-*b*:2',3'-*e*][1,4]-thiazine (**6**) (300 MHz, acetone-*d*<sub>6</sub>, *T* = 298 K).

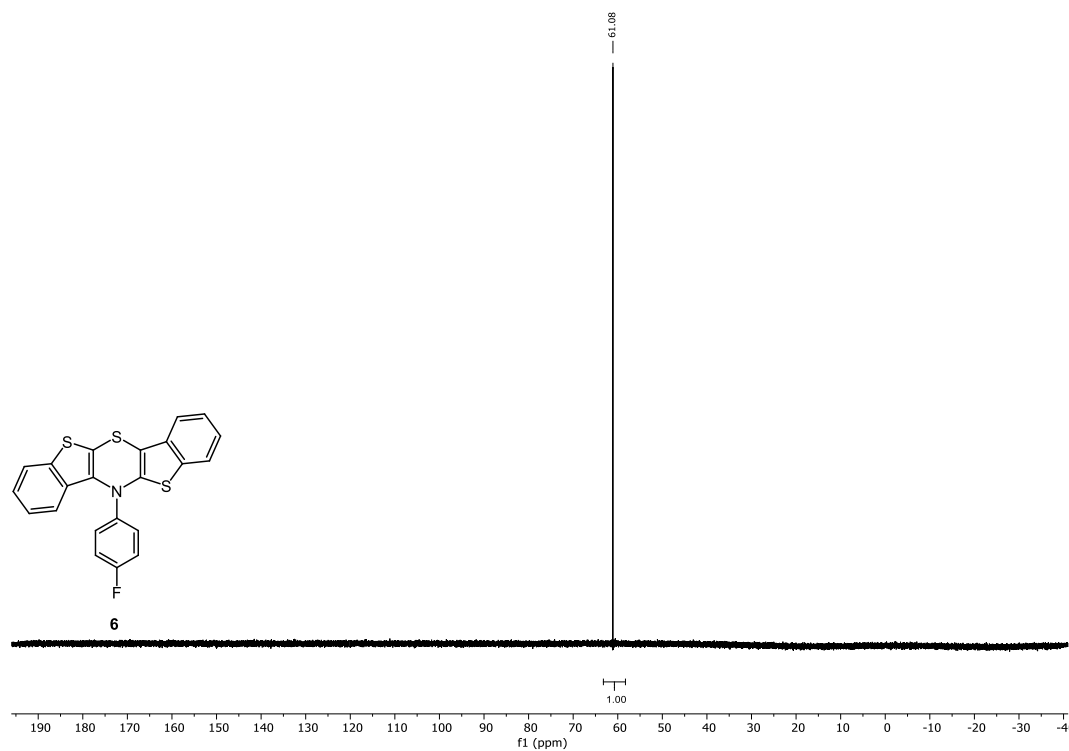

Figure S7: <sup>19</sup>F NMR spectrum of *N*-(4-fluorophenyl)bis[1]benzothieno[2,3-*b*:2',3'-*e*][1,4]-thiazine (**6**) (282 MHz, acetone-*d*<sub>6</sub>, *T* = 298 K).

## 2.3 *N*-(4-Fluorophenyl)bis[1]benzothieno[3,2-*b*:2',3'-*e*][1,4]thiazine (**7**)

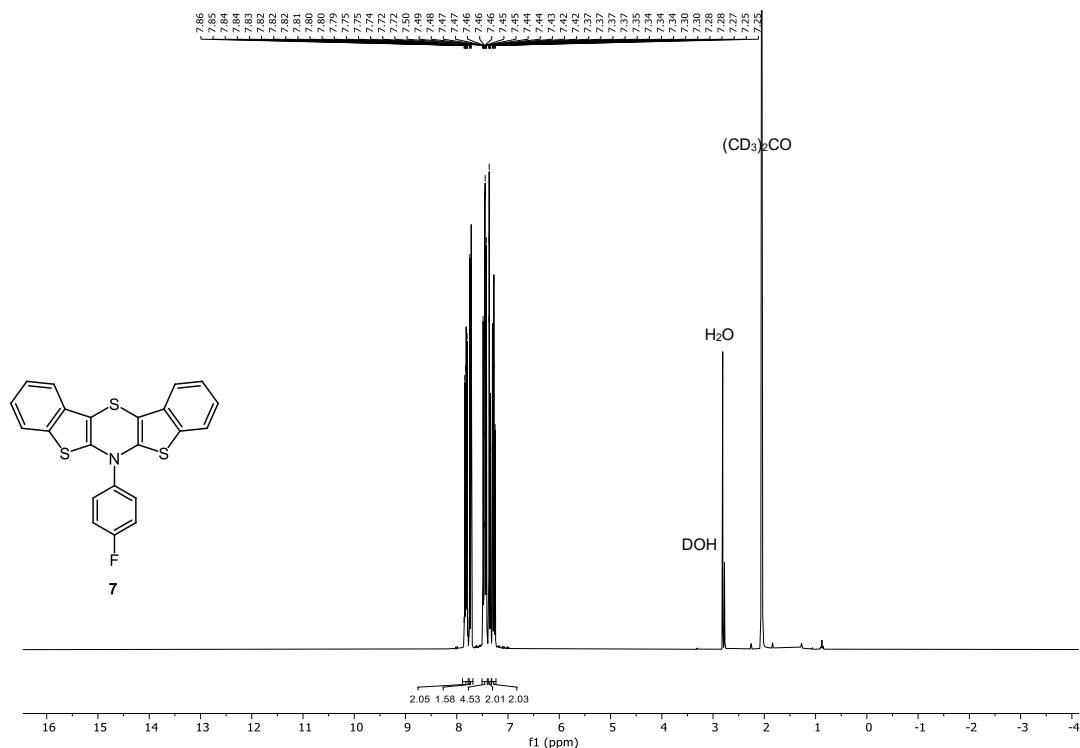

Figure S8:  $^1\text{H}$  NMR spectrum of *N*-(4-fluorophenyl)bis[1]benzothieno[3,2-*b*:2',3'-*e*][1,4]thiazine (**7**) (300 MHz, acetone- $d_6$ ,  $T = 298$  K).

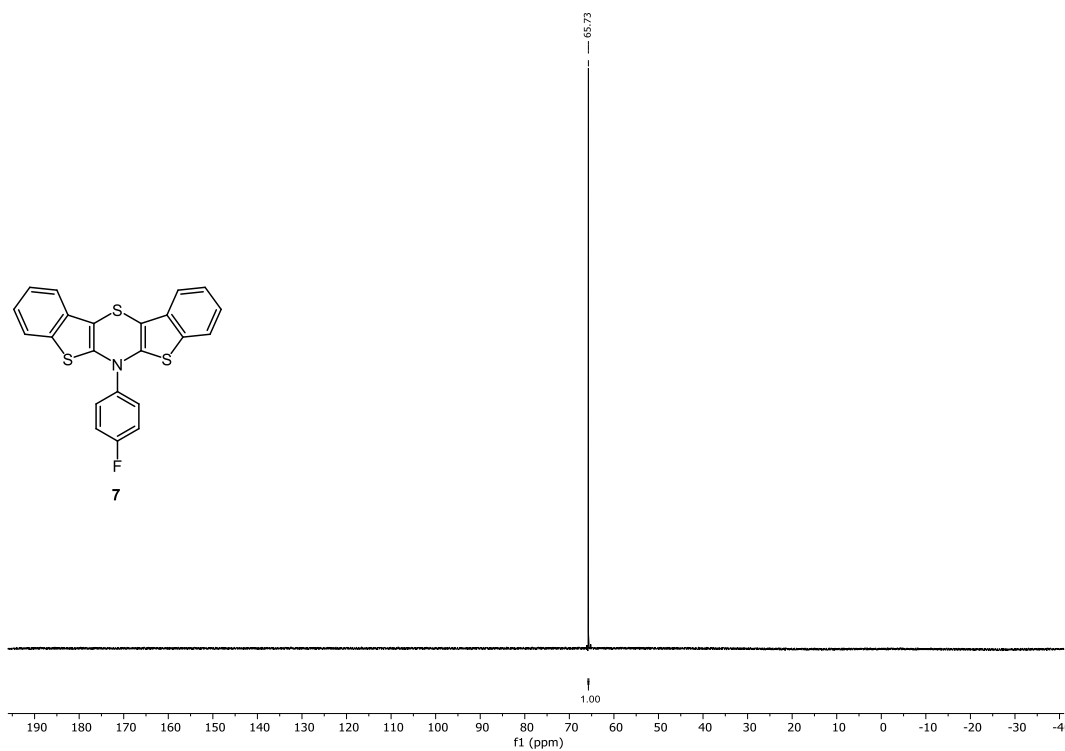

Figure S9:  $^{19}\text{F}$  NMR spectrum of *N*-(4-fluorophenyl)bis[1]benzothieno[3,2-*b*:2',3'-*e*][1,4]thiazine (**7**) (282 MHz, acetone- $d_6$ ,  $T = 298$  K).



## 2.4 Hexachloroantimonate salt of $5^{2+}$

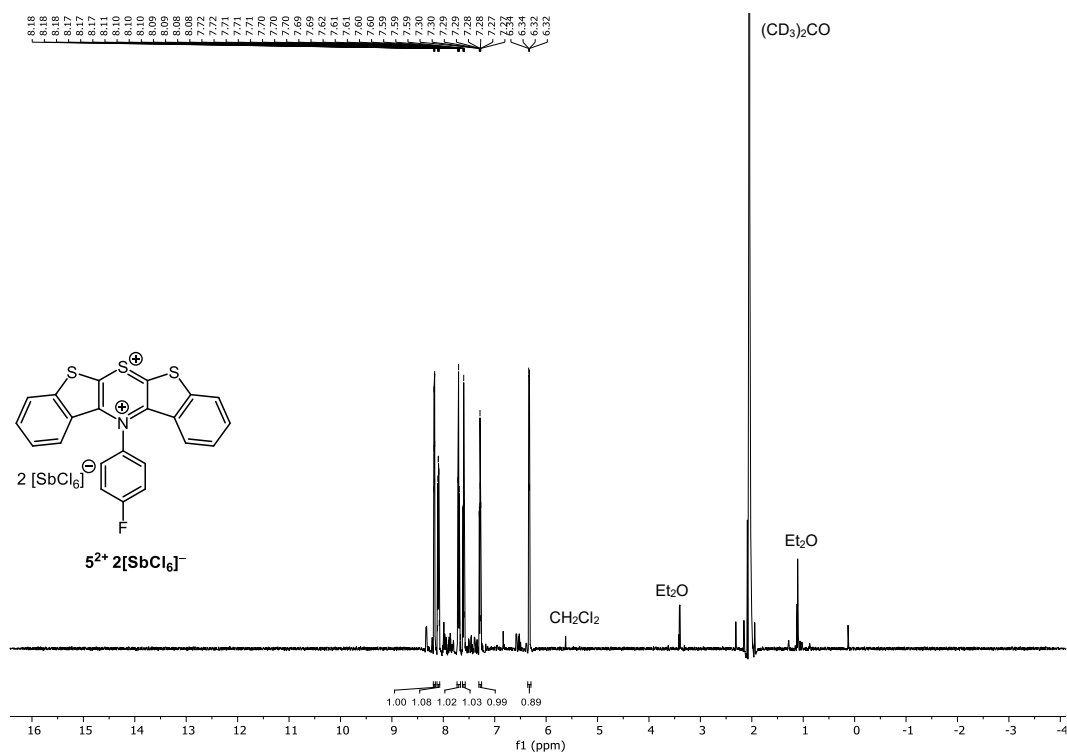

Figure S10:  $^1\text{H}$  NMR spectrum of hexachloroantimonate(V) salt of  $5^{2+}$  (600 MHz, acetone- $d_6$ ,  $T = 298$  K).

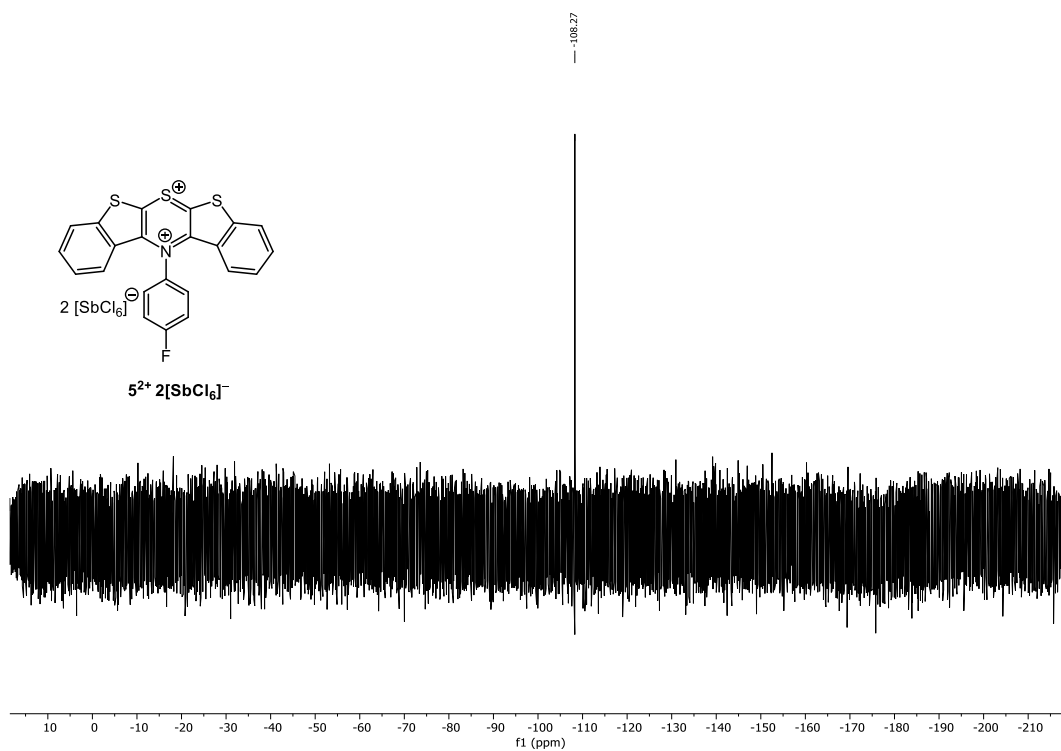

Figure S11:  $^{19}\text{F}$  NMR spectrum of hexachloroantimonate(V) salt of  $5^{2+}$  (565 MHz, acetone- $d_6$ ,  $T = 298$  K).

## 2.5 Hexachloroantimonate salt of $6^{2+}$

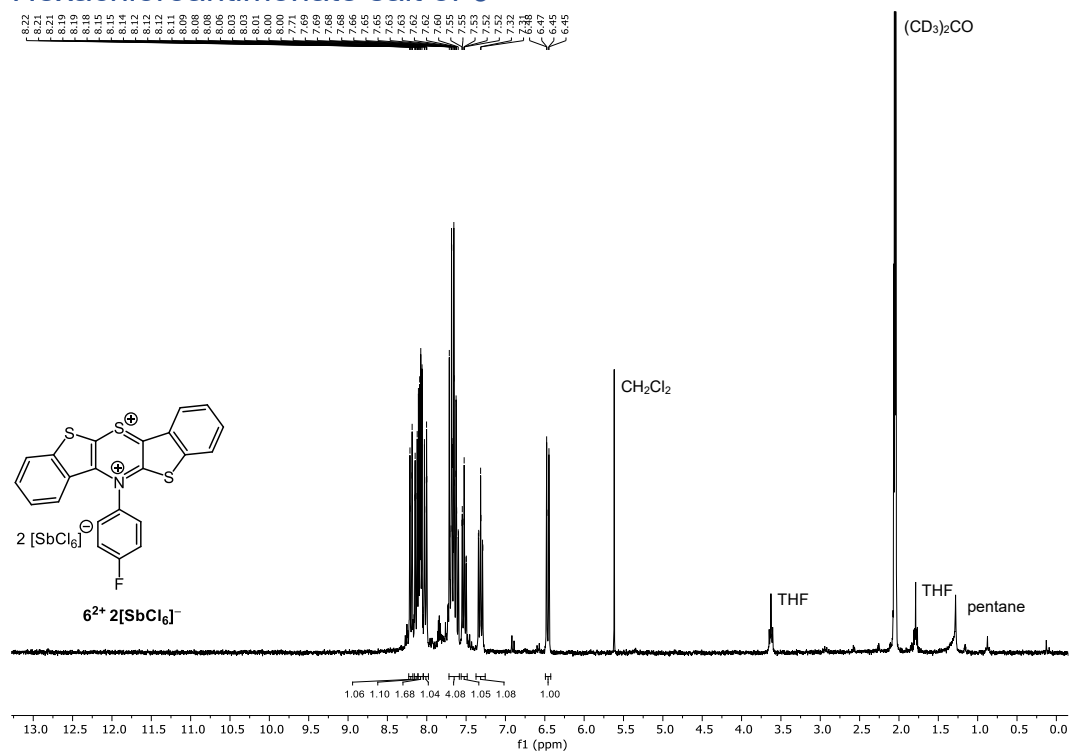

Figure S12:  $^1\text{H}$  NMR spectrum of hexachloroantimonate(V) salt of  $6^{2+}$  (600 MHz, acetone- $d_6$ ,  $T = 298$  K).

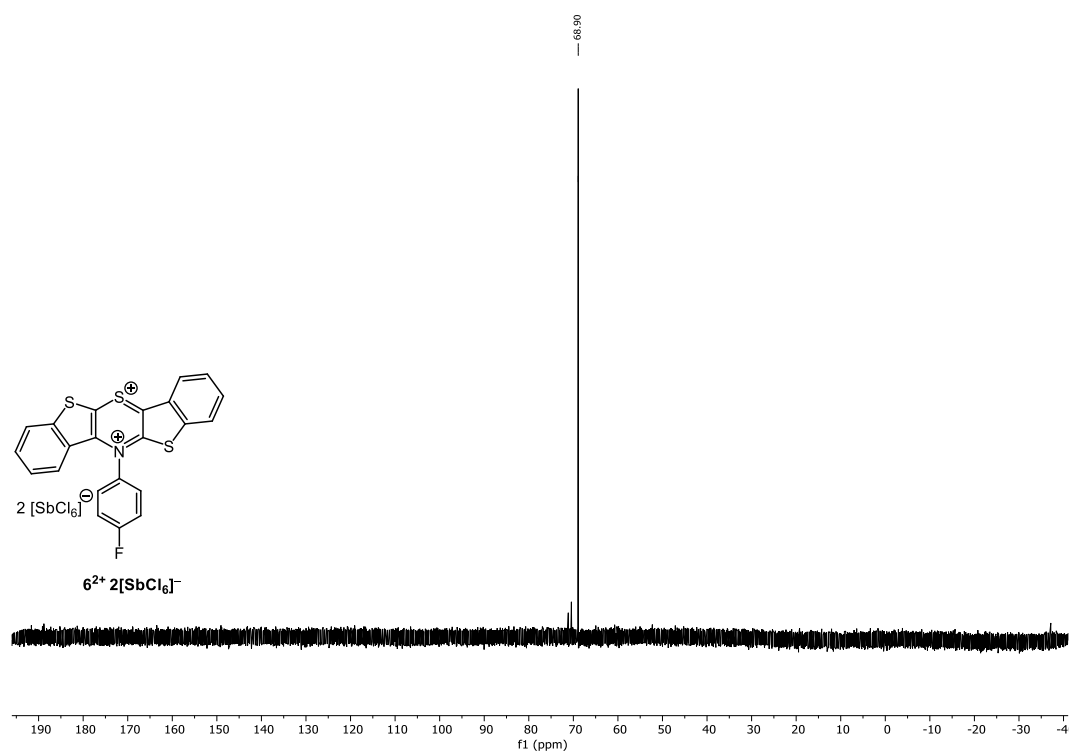

Figure S13:  $^{19}\text{F}$  NMR spectrum of hexachloroantimonate(V) salt of  $6^{2+}$  (282 MHz, acetone- $d_6$ ,  $T = 298$  K).

## 2.6 Hexachloroantimonate salt of $7^{2+}$

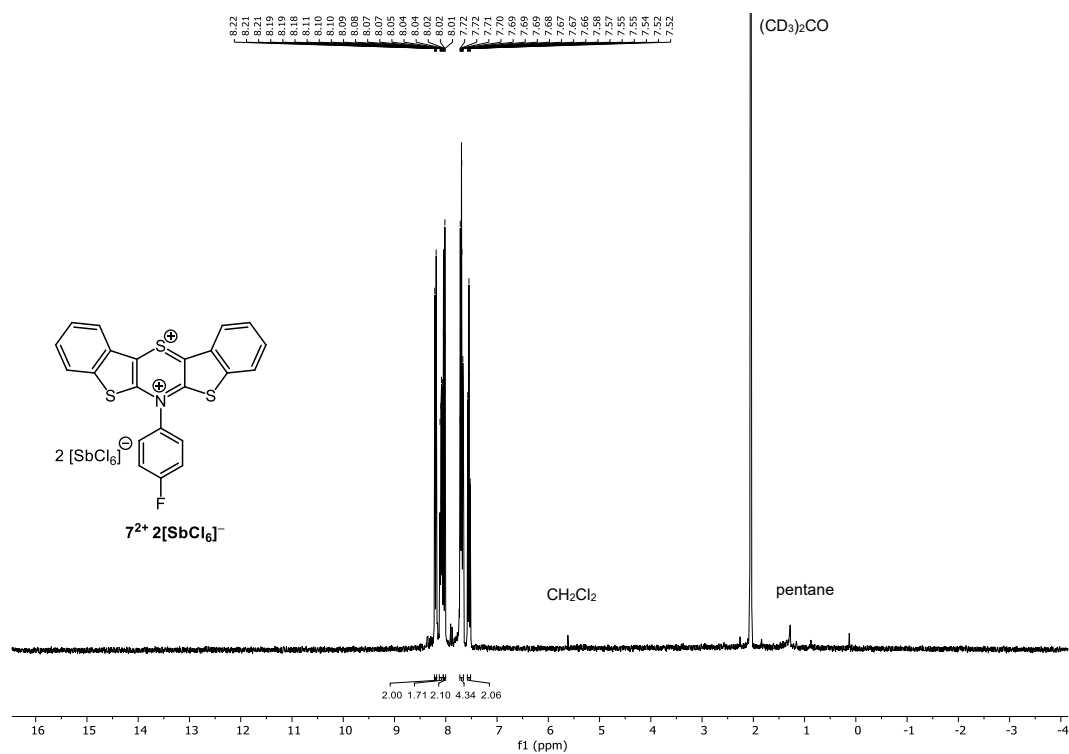

Figure S14:  $^1\text{H}$  NMR spectrum of hexachloroantimonate(V) salt of  $7^{2+}$  (600 MHz,  $\text{acetone-}d_6$ ,  $T = 298$  K).

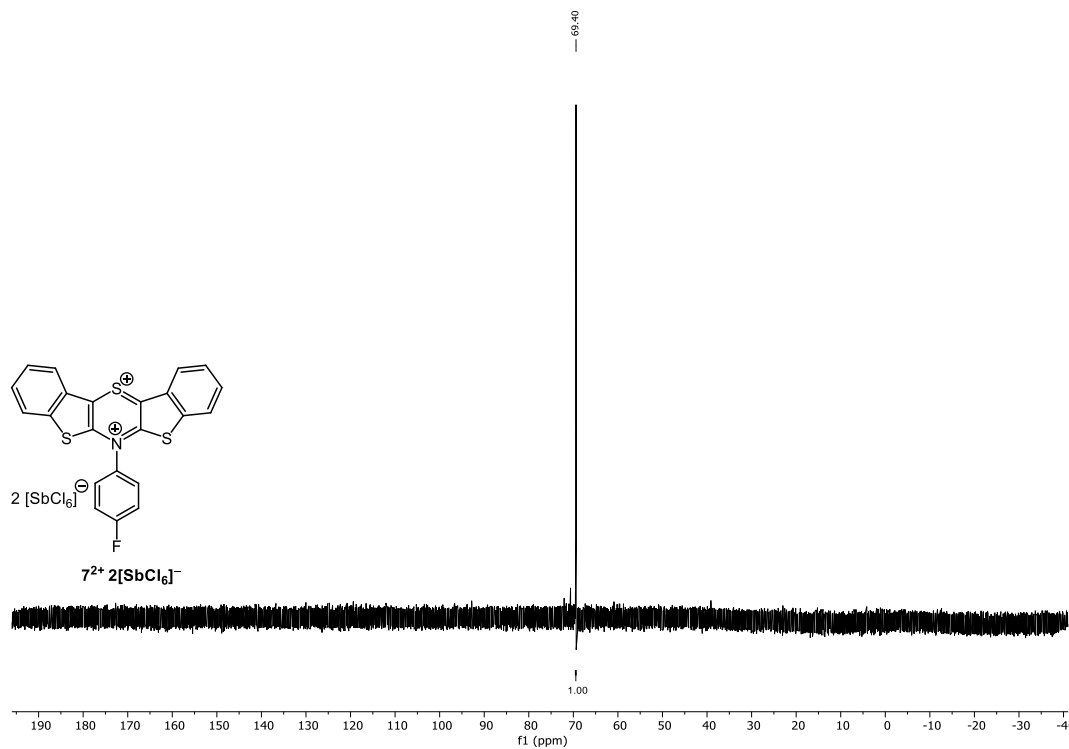

Figure S15:  $^{19}\text{F}$  NMR spectrum of hexachloroantimonate(V) salt of  $7^{2+}$  (282 MHz,  $\text{acetone-}d_6$ ,  $T = 298$  K).

### 3 Simulated and experimental EPR-spectra of hexachloroantimonate radical cation salts of **5<sup>•+</sup>**, **6<sup>•+</sup>** and **7<sup>•+</sup>**

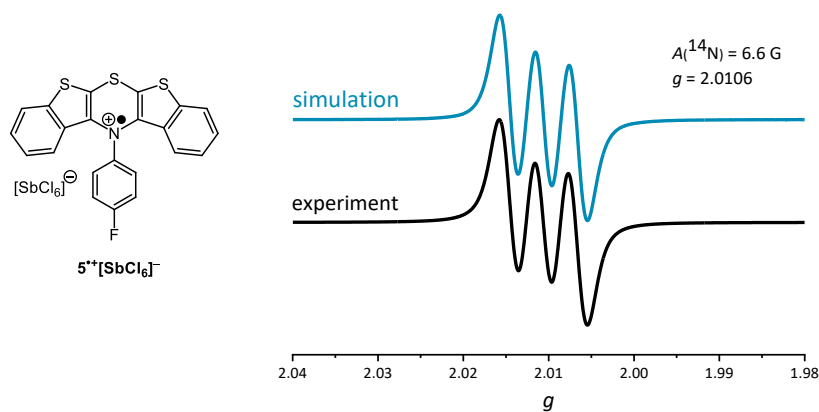

Figure S16: Simulated und experimental EPR spectrum of hexachloroantimonate salt of **5<sup>•+</sup>** (THF,  $T = 298 \text{ K}$ ,  $g$ -factor referenced to external  $\text{Mn}^{2+}$  in ZnS).

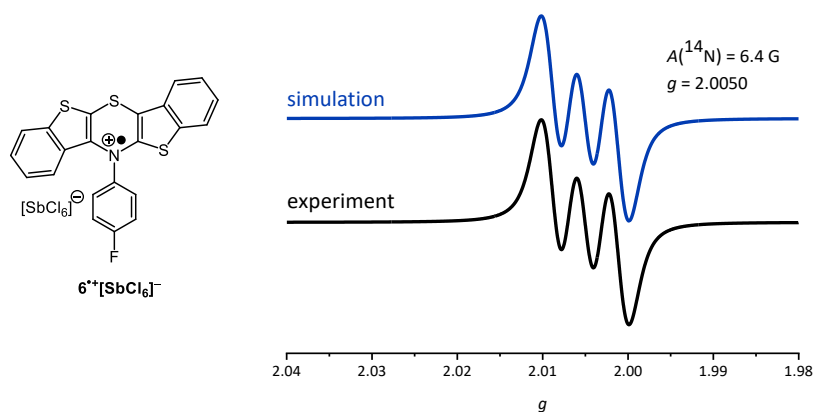

Figure S17: Simulated und experimental EPR spectrum of hexachloroantimonate salt of **6<sup>•+</sup>** (THF,  $T = 298 \text{ K}$ ,  $g$ -factor referenced to external  $\text{Mn}^{2+}$  in ZnS).

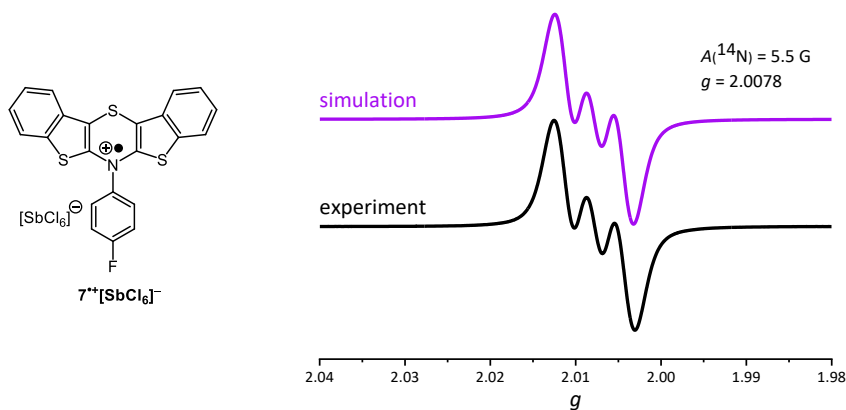

Figure S18: Simulated und experimental EPR spectrum of hexachloroantimonate salt of **7<sup>•+</sup>** (THF,  $T = 298 \text{ K}$ ,  $g$ -factor referenced to external  $\text{Mn}^{2+}$  in ZnS).

## 4 Spectroelectrochemical data of *N-p*-fluorophenyl-BBTT regioisomers

The spectroelectrochemical experiments were performed with a Specac omni-cell liquid transmission cell and CaF<sub>2</sub> windows, equipped with Pt gauze as working and counter electrode and an Ag wire as pseudo-reference electrode, meltsealed in a polyethylene spacer (approximate path length 0.5 mm) in dichloromethane (20 ± 2 mM solutions in CH<sub>2</sub>Cl<sub>2</sub>, containing 0.1 M [<sup>7</sup>Bu<sub>4</sub>N][PF<sub>6</sub>]).<sup>[5]</sup> UV/Vis spectra were recorded on a Varian Cary 5000 spectrometer using 1.0 cm cells (Hellma, Suprasil). The electrochemical part was carried out on a BioLogic SP-50 voltammetric analyzer. A UV/Vis spectrum was measured prior to application of voltage. Voltage was applied in the range from –500 mV to 1400 mV in steps of 100 mV. The exact range differed from system to system. The measurement started at low voltage rising to the maximum voltage and then decreased to lower voltages to reach the minimum voltage at the end of the measurement. A constant voltage was applied for six minutes. During this interval three UV/Vis spectra were recorded. The recording of the first UV/Vis spectrum at a certain voltage started when this voltage was applied and required ca. 90 s.

X-band CW EPR spectra were measured on a Miniscope MS 300 (Magnettech GmbH, Berlin, Germany) in solution (ca. 0.5 mM) at room temperature. *g*-factors were referenced to external Mn<sup>2+</sup> in ZnS (*g* = 2.118, 2.066, 2.027, 1.986, 1.946, 1.906). The settings were as follows: *microwave frequency* = 9.48 GHz, *center field* = 3354.72 G; *sweep* = 499.77 G; *modulation amplitude* = 2000 mG; *receiver gain* = 10; *microwave attenuation* = 15 dB; *sweep time* = 90 s. Simulations of EPR spectra were performed with EasySpin (v 5.2.23) for Matlab R2016b.<sup>[6]</sup>

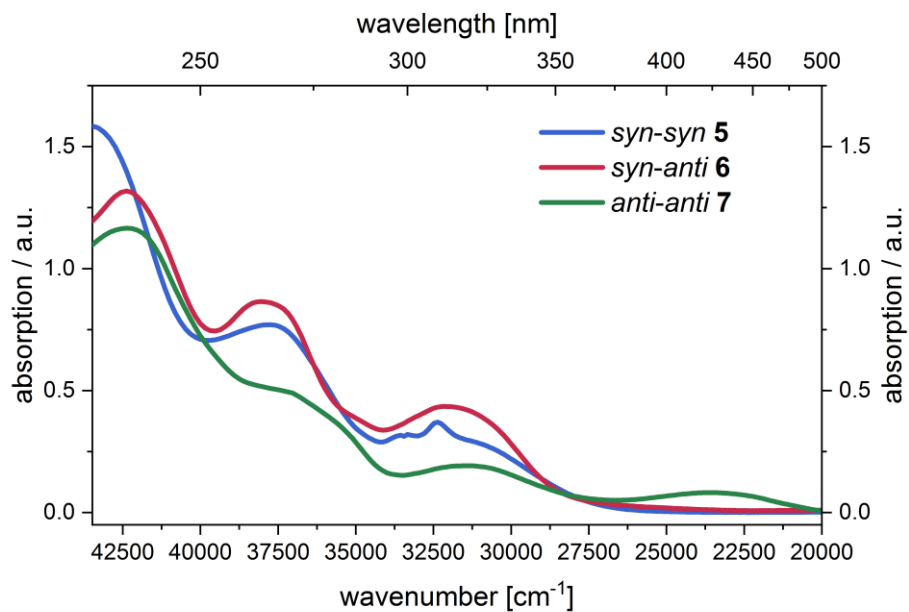

Figure S19: UV/Vis spectra of compounds **5**, **6**, and **7** in the spectroelectrochemical cell at zero potential (CH<sub>2</sub>Cl<sub>2</sub>,  $T = 293$  K).

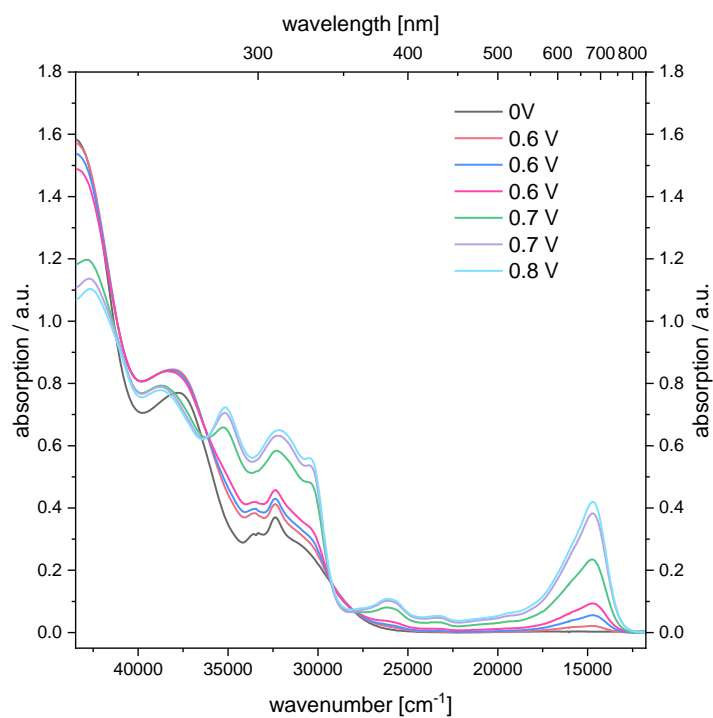

Figure S20: Spectroelectrochemical measurements of compound **5** forming the corresponding radical cation **5<sup>•+</sup>** (CH<sub>2</sub>Cl<sub>2</sub>, 293 K; electrolyte 0.1 M [tBu<sub>4</sub>N][PF<sub>6</sub>]; Pt working electrode, Pt counter electrode and Ag/AgCl pseudo reference electrode).

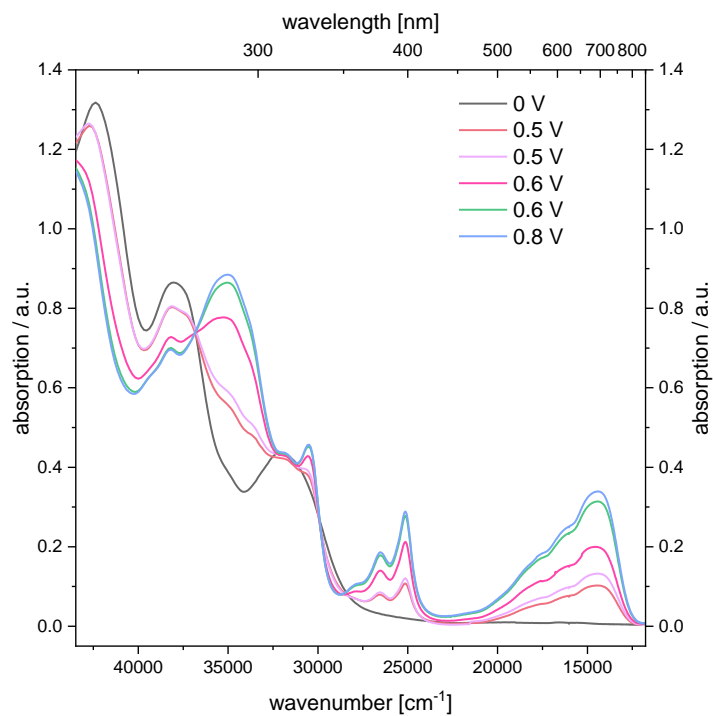

Figure S21: Spectroelectrochemical measurements of compounds **6** forming the corresponding radical cation **6<sup>•+</sup>** ( $\text{CH}_2\text{Cl}_2$ , 293 K; electrolyte 0.1 M  $[\text{nBu}_4\text{N}][\text{PF}_6]$ ; Pt working electrode, Pt counter electrode and Ag/AgCl pseudo reference electrode).

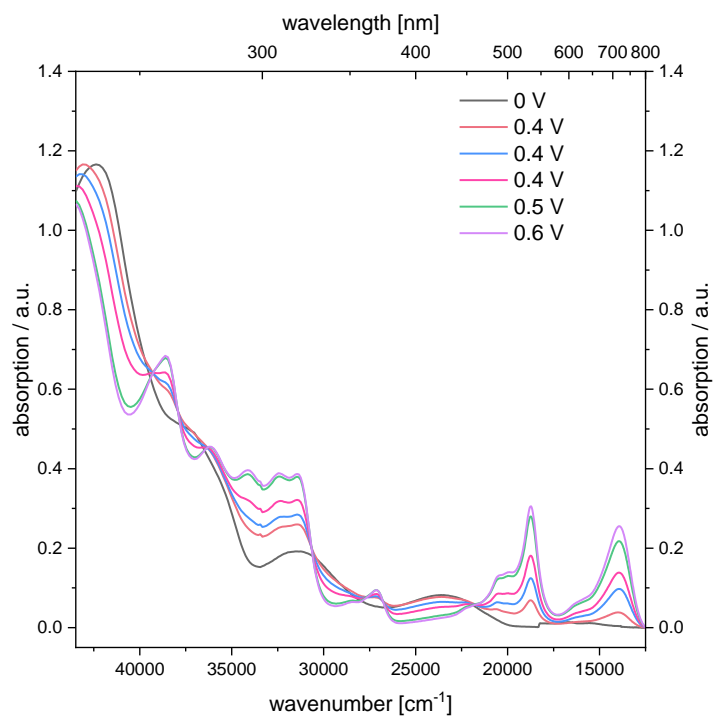

Figure S22: Spectroelectrochemical measurements of compounds **7** forming the corresponding radical cation **7<sup>•+</sup>** ( $\text{CH}_2\text{Cl}_2$ , 293 K; electrolyte 0.1 M  $[\text{nBu}_4\text{N}][\text{PF}_6]$ ; Pt working electrode, Pt counter electrode and Ag/AgCl pseudo reference electrode).

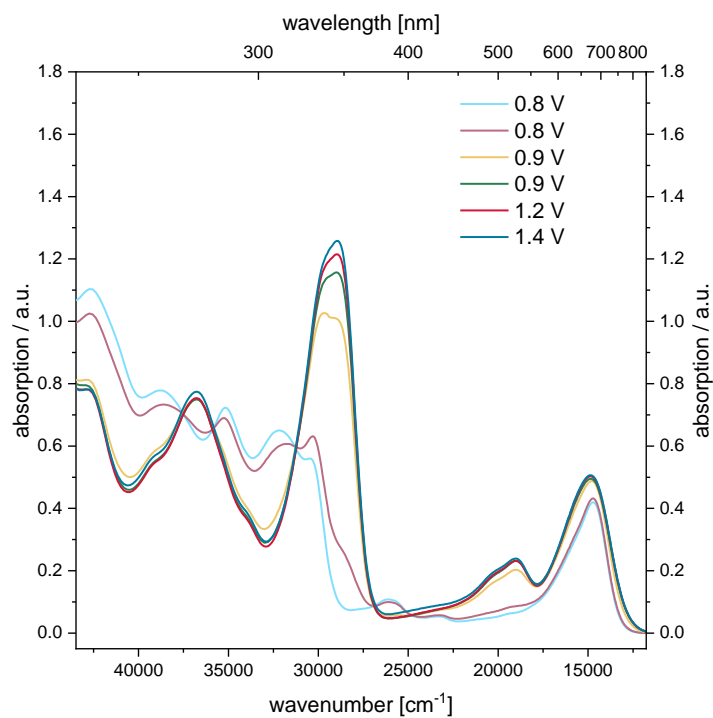

Figure S23: UV/Vis spectroelectrochemical measurements of radical cation  $5^{\bullet+}$  forming the corresponding dication  $5^{2+}$  ( $\text{CH}_2\text{Cl}_2$ , 293 K; electrolyte 0.1 M  $[\text{nBu}_4\text{N}][\text{PF}_6]$ ; Pt working electrode, Pt counter electrode and Ag/AgCl pseudo reference electrode).

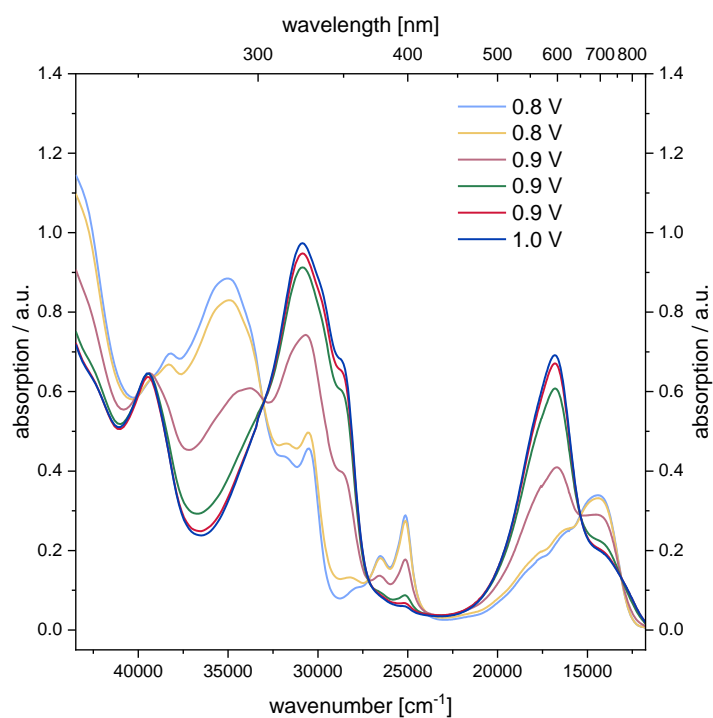

Figure S24: UV/Vis spectroelectrochemical measurements of radical cation  $6^{\bullet+}$  forming the corresponding dication  $6^{2+}$  ( $\text{CH}_2\text{Cl}_2$ , 293 K; electrolyte 0.1 M  $[\text{nBu}_4\text{N}][\text{PF}_6]$ ; Pt working electrode, Pt counter electrode and Ag/AgCl pseudo reference electrode).



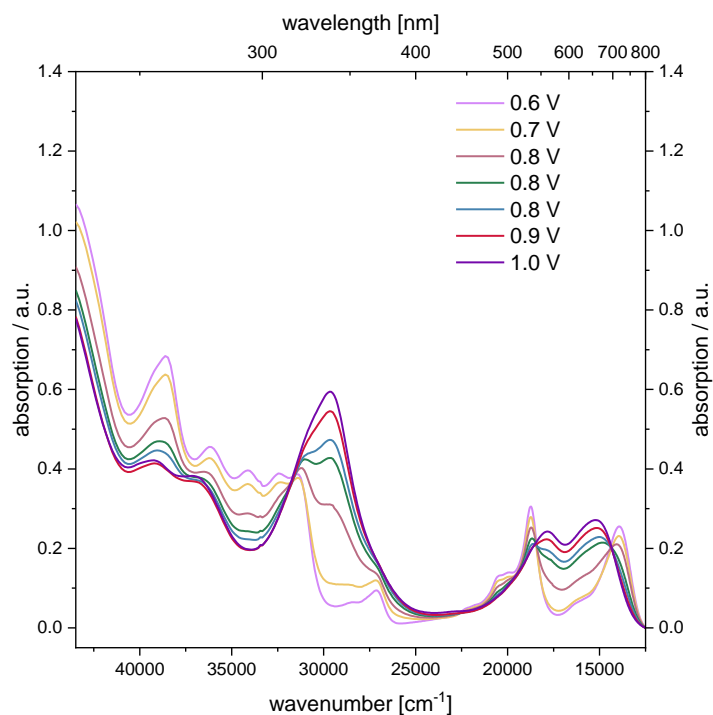

Figure S25: UV/Vis spectroelectrochemical measurements of radical cation **7<sup>•+</sup>** forming the corresponding dication **7<sup>2+</sup>** (CH<sub>2</sub>Cl<sub>2</sub>, 293 K; electrolyte 0.1 M [*n*Bu<sub>4</sub>N][PF<sub>6</sub>]; Pt working electrode, Pt counter electrode and Ag/AgCl pseudo reference electrode).

In addition, a reduction of the obtained oxidized species back to the neutral state was achieved by lowering the applied potential. This was successfully performed for *syn-syn* derivate, while for *syn-anti* and *anti-anti* regioisomers irreversible side reactions of the dications were detected in addition to the proportional successful recovery of reduced compounds revealing the dications expected intrinsic instability.

Table S1: Spectroelectrochemical data of *N-p*-fluorophenyl-BBTs **5**, **6**, and **7**, and corresponding radical cations **5<sup>•+</sup>**, **6<sup>•+</sup>**, and **7<sup>•+</sup>**, and dications **5<sup>2+</sup>**, **6<sup>2+</sup>**, and **7<sup>2+</sup>** (CH<sub>2</sub>Cl<sub>2</sub>, *T* = 293 K).

| compound         | absorption maxima $\lambda_{\text{max}}$ [nm]                                                        | isosbestic points [nm]                                                     |
|------------------|------------------------------------------------------------------------------------------------------|----------------------------------------------------------------------------|
| <i>syn-syn</i>   | <b>5</b> 232, 263, 298, 309                                                                          |                                                                            |
|                  | <b>5<sup>•+</sup></b> 226, 234, 258, 284, 295 (sh), 311, 328, 382, 427, 494, 680                     | <b>5</b> → <b>5<sup>•+</sup></b> 243, 276, 342, 357                        |
|                  | <b>5<sup>2+</sup></b> 227, 233, 272, 346, 494, 526, 672                                              | <b>5<sup>•+</sup></b> → <b>5<sup>2+</sup></b> 266, 279, 320, 372, 401      |
| <i>syn-anti</i>  | <b>6</b> 235, 262, 311                                                                               |                                                                            |
|                  | <b>6<sup>•+</sup></b> 228, 262, 285, 315 (sh), 328, 360 (sh), 377, 398, 566 (sh), 617(sh), 694       | <b>6</b> → <b>6<sup>•+</sup></b> 271, 317, 351                             |
|                  | <b>6<sup>2+</sup></b> 224, 236 (sh), 253, 324, 349 (sh), 395, 595, 709 (sh)                          | <b>6<sup>•+</sup></b> → <b>6<sup>2+</sup></b> 249, 303, 368, 418, 649, 763 |
| <i>anti-anti</i> | <b>7</b> 236, shoulder 268, 320, 423                                                                 |                                                                            |
|                  | <b>7<sup>•+</sup></b> 229, 259, 276, 293, 308, 318, 352, 369, 450 (sh), 490, 502, 534, 626 (sh), 717 | <b>7</b> → <b>7<sup>•+</sup></b> 255, 264, 275, 326, 361, 374, 459         |
|                  | <b>7<sup>2+</sup></b> 223, 255, 271, 337, 561, 657                                                   | <b>7<sup>•+</sup></b> → <b>7<sup>2+</sup></b> 316, 444, 542, 697           |

Table S2: Experimental and TDDFT calculated (uB3LYP/6-311++G\*\*, SCRF IEFPCM CH<sub>2</sub>Cl<sub>2</sub>) absorption spectra of radical cations (**5<sup>•+</sup>**, **6<sup>•+</sup>**, **7<sup>•+</sup>**) and dications (**5<sup>2+</sup>**, **6<sup>2+</sup>**, **7<sup>2+</sup>**).

| compound              |          | calculated $\lambda_{\text{max,cal}}$ [nm] (oscillator strength $f$ ) | experimental $\lambda_{\text{max,exp}}$ [nm] | most dominant contribution (%) |     |                    |
|-----------------------|----------|-----------------------------------------------------------------------|----------------------------------------------|--------------------------------|-----|--------------------|
| <b>syn-syn</b>        | <b>5</b> | 339 (0.075)                                                           | 309                                          | HOMO → LUMO (94)               |     |                    |
|                       |          | 292 (0.098)                                                           | 298                                          | HOMO-2 → LUMO+1 (68)           |     |                    |
|                       |          | 278 (0.189)                                                           | 263                                          | HOMO-1 → LUMO+1 (56)           |     |                    |
|                       |          | 245 (0.104)                                                           | 232                                          | HOMO → LUMO+10 (47)            |     |                    |
|                       |          | 245 (0.269)                                                           | 232                                          | HOMO-1 → LUMO+3 (58)           |     |                    |
|                       |          | 236 (0.080)                                                           | 232                                          | HOMO-1 → LUMO+4 (64)           |     |                    |
| <b>5<sup>•+</sup></b> |          | 665 (0.191)                                                           | 680                                          | HOMO-1 → SOMO (100)            |     |                    |
|                       |          | 398 (0.026)                                                           | 382                                          | HOMO-1 → LUMO (33)             |     |                    |
|                       |          | 301 (0.412)                                                           | 311                                          | HOMO-2 → LUMO (60)             |     |                    |
|                       |          | 300 (0.111)                                                           | 311                                          | HOMO-1 → LUMO (43)             |     |                    |
| <b>5<sup>2+</sup></b> |          | 736 (0.226)                                                           | 672                                          | HOMO → LUMO (92)               |     |                    |
|                       |          | 563 (0.138)                                                           | 526                                          | HOMO-3 → LUMO (82)             |     |                    |
|                       |          | 517 (0.078)                                                           | 526                                          | HOMO-4 → LUMO (91)             |     |                    |
|                       |          | 470 (0.011)                                                           | 494                                          | HOMO-5 → LUMO (100)            |     |                    |
|                       |          | 325 (0.578)                                                           | 346                                          | HOMO-1 → LUMO+1 (91)           |     |                    |
| <b>syn-anti</b>       | <b>6</b> | 382 (0.008)                                                           | -                                            | HOMO → LUMO (97)               |     |                    |
|                       |          | 331 (0.143)                                                           | 311                                          | HOMO → LUMO+1 (68)             |     |                    |
|                       |          | 286 (0.103)                                                           | 311                                          | HOMO-1 → LUMO (77)             |     |                    |
|                       |          | 269 (0.465)                                                           | 262                                          | HOMO-2 → LUMO (78)             |     |                    |
|                       |          | 237 (0.150)                                                           | 235                                          | HOMO → LUMO+14 (32)            |     |                    |
|                       |          | 231 (0.114)                                                           | 235                                          | HOMO-4 → LUMO+1 (46)           |     |                    |
|                       |          | <b>6<sup>•+</sup></b>                                                 |                                              | 714 (0.086)                    | 694 | HOMO-1 → SOMO (97) |
|                       |          |                                                                       |                                              | 617 (0.156)                    | 617 | HOMO-2 → SOMO (95) |
|                       |          |                                                                       |                                              | 577 (0.022)                    | 566 | HOMO-3 → SOMO (94) |
|                       |          |                                                                       |                                              | 398 (0.022)                    | 398 | HOMO-6 → SOMO (57) |
| 391 (0.026)           | 377      |                                                                       |                                              | HOMO-6 → SOMO (35)             |     |                    |
| 304 (0.102)           | 328      |                                                                       |                                              | HOMO-1 → LUMO (26)             |     |                    |
| <b>6<sup>2+</sup></b> |          | 286 (0.441)                                                           | 285                                          | HOMO-2 → LUMO (41)             |     |                    |
|                       |          | 817 (0.063)                                                           | broad 650-850                                | HOMO → LUMO (78)               |     |                    |

|                  |                       |             |     |                       |
|------------------|-----------------------|-------------|-----|-----------------------|
|                  |                       | 617 (0.354) | 595 | HOMO-1 → LUMO (64)    |
|                  |                       | 387 (0.019) | 395 | HOMO-6 → LUMO (100)   |
|                  |                       | 335 (0.135) | 349 | HOMO → LUMO+1 (100)   |
|                  |                       | 311 (0.704) | 324 | HOMO-1 → LUMO+1 (100) |
| <b>anti-anti</b> | <b>7</b>              | 422 (0.144) | 423 | HOMO → LUMO (95)      |
|                  |                       | 334 (0.081) | 320 | HOMO → LUMO+3 (84)    |
|                  |                       | 279 (0.145) | 268 | HOMO-2 → LUMO (81)    |
|                  |                       | 268 (0.178) | 268 | HOMO → LUMO+10 (71)   |
|                  |                       | 243 (0.129) | 236 | HOMO → LUMO+15 (51)   |
|                  |                       | 233 (0.147) | 236 | HOMO-2 → LUMO+6 (18)  |
|                  | <b>7<sup>+</sup></b>  | 701 (0.154) | 717 | HOMO-1 → SOMO (98)    |
|                  |                       | 538 (0.111) | 534 | HOMO-3 → SOMO (100)   |
|                  |                       | 488 (0.077) | 490 | SOMO → LUMO (97)      |
|                  |                       | 298 (0.156) | 318 | LUMO → LUMO+5 (50)    |
|                  |                       | 292 (0.111) | 308 | HOMO-1 → LUMO (29)    |
|                  |                       | 292 (0.215) | 293 | HOMO-2 → LUMO (38)    |
|                  | <b>7<sup>2+</sup></b> | 747 (0.163) | 657 | HOMO → LUMO (83)      |
|                  |                       | 579 (0.363) | 561 | HOMO-2 → LUMO (84)    |
|                  |                       | 328 (0.128) | 337 | HOMO → LUMO+1 (100)   |
|                  |                       | 317 (0.490) | 337 | HOMO-1 → LUMO+1 (100) |

## 5 Spectral data of hexachloroantimonate radical cation salts of $5^{+\bullet}$ , $6^{+\bullet}$ and $7^{+\bullet}$

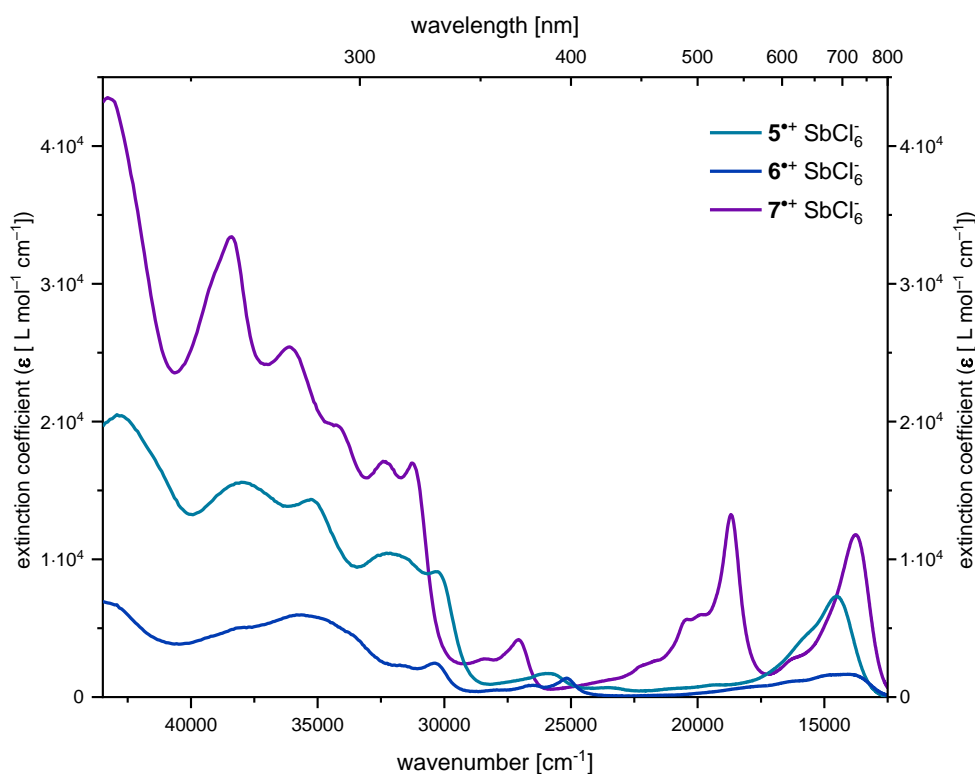

Figure S26: UV/Vis spectra from measurements of the hexachloroantimonate radical cation salts of  $5^{+\bullet}$ ,  $6^{+\bullet}$  and  $7^{+\bullet}$  ( $\text{CH}_2\text{Cl}_2$ ,  $T = 293 \text{ K}$ ).

Table S3: UV/Vis spectral data of hexachloroantimonate radical cations  $5^{+\bullet}$ ,  $6^{+\bullet}$ , and  $7^{+\bullet}$  ( $\text{CH}_2\text{Cl}_2$ ,  $T = 293 \text{ K}$ ).

| compound         |                | absorption maxima $\lambda_{\text{max}}$ [nm] ( $\epsilon$ [ $\text{L mol}^{-1}\text{cm}^{-1}$ ])                                                                                   |
|------------------|----------------|-------------------------------------------------------------------------------------------------------------------------------------------------------------------------------------|
| <i>syn-syn</i>   | $5^{+\bullet}$ | 233 (20300), 263 (15700), 283 (14400), 311 (10500), 330 (9130), 386 (1740),<br>shoulder 640 (4660), 688 (7350)                                                                      |
| <i>syn-anti</i>  | $6^{+\bullet}$ | shoulder 264 (5060), 280 (5990), 329 (2450), shoulder 361 (500), 379 (840), 397<br>(1350), shoulder 569 (780), shoulder 628 (1180), 709 (1650)                                      |
| <i>anti-anti</i> | $7^{+\bullet}$ | 261 (33200), 277 (25400), shoulder 292 (19700), 309 (17100), 320 (17000), shoulder<br>351 (2770), 370 (4170), shoulder 490 (5650), shoulder 503 (5980), 535 (13300), 726<br>(11800) |

## 6 Data of Quantum Chemical Calculations

Quantum chemical calculations were performed on the DFT and TDDFT level of theory using the functionals and basis sets as implemented in the Gaussian 09 program package.<sup>[7]</sup>

### 6.1 Computed molecular orbital transitions of reduced compounds, radical cations and dications ((u)B3LYP/6-311++G\*\*, IEFPCM CH<sub>2</sub>Cl<sub>2</sub>)

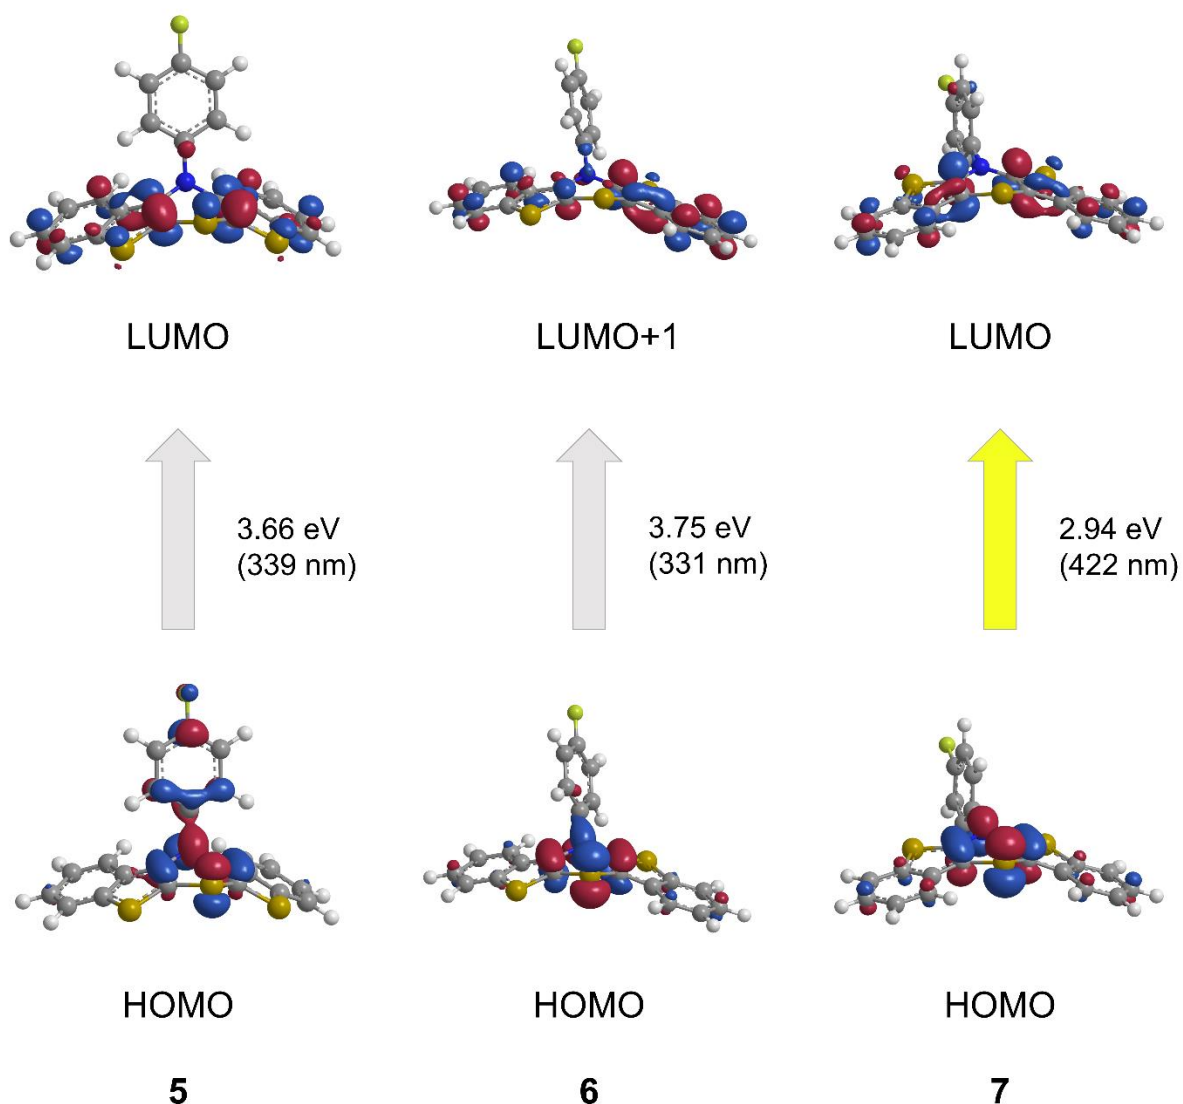

Figure S27: TDDFT calculated absorptions of neutral BBTs **5**, **6**, and **7** illustrated by the relevant molecular orbital transitions (B3LYP/6-311++G\*\*, IEFPCM CH<sub>2</sub>Cl<sub>2</sub>, isosurface value at 0.05 a.u.).

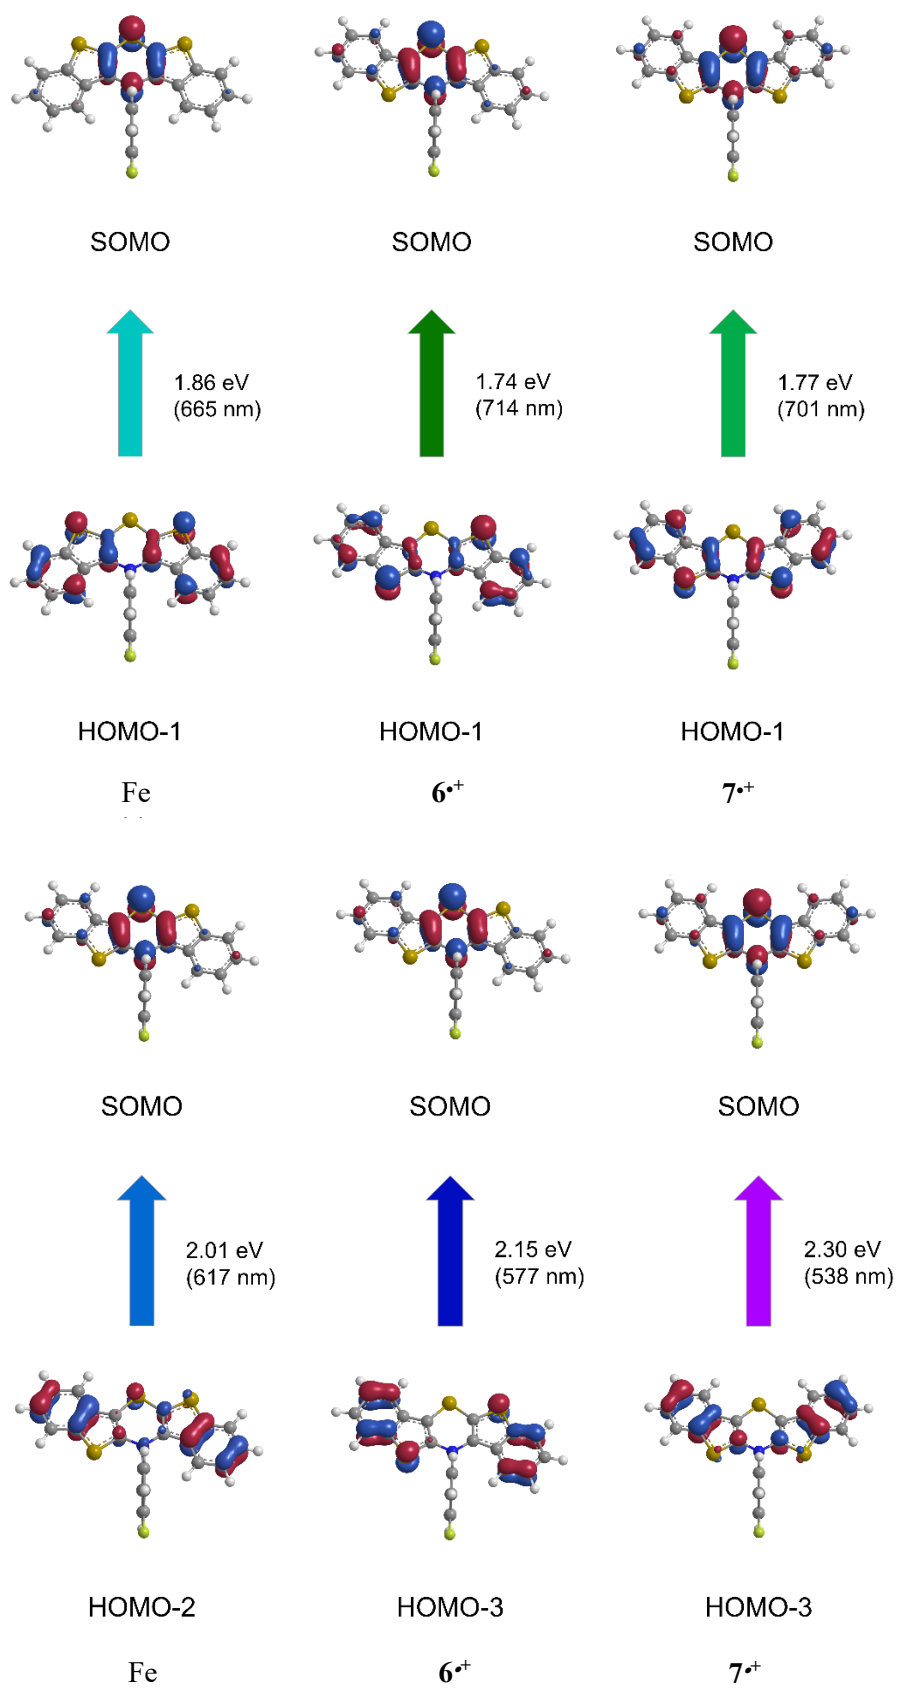

Figure S28: TDDFT calculated absorptions of radical cations  $5^{•+}$ ,  $6^{•+}$ , and  $7^{•+}$  illustrated by the relevant molecular orbital transitions (uB3LYP/6-311++G\*\*, IEFPCM CH<sub>2</sub>Cl<sub>2</sub>, isosurface value at 0.05 a.u.).

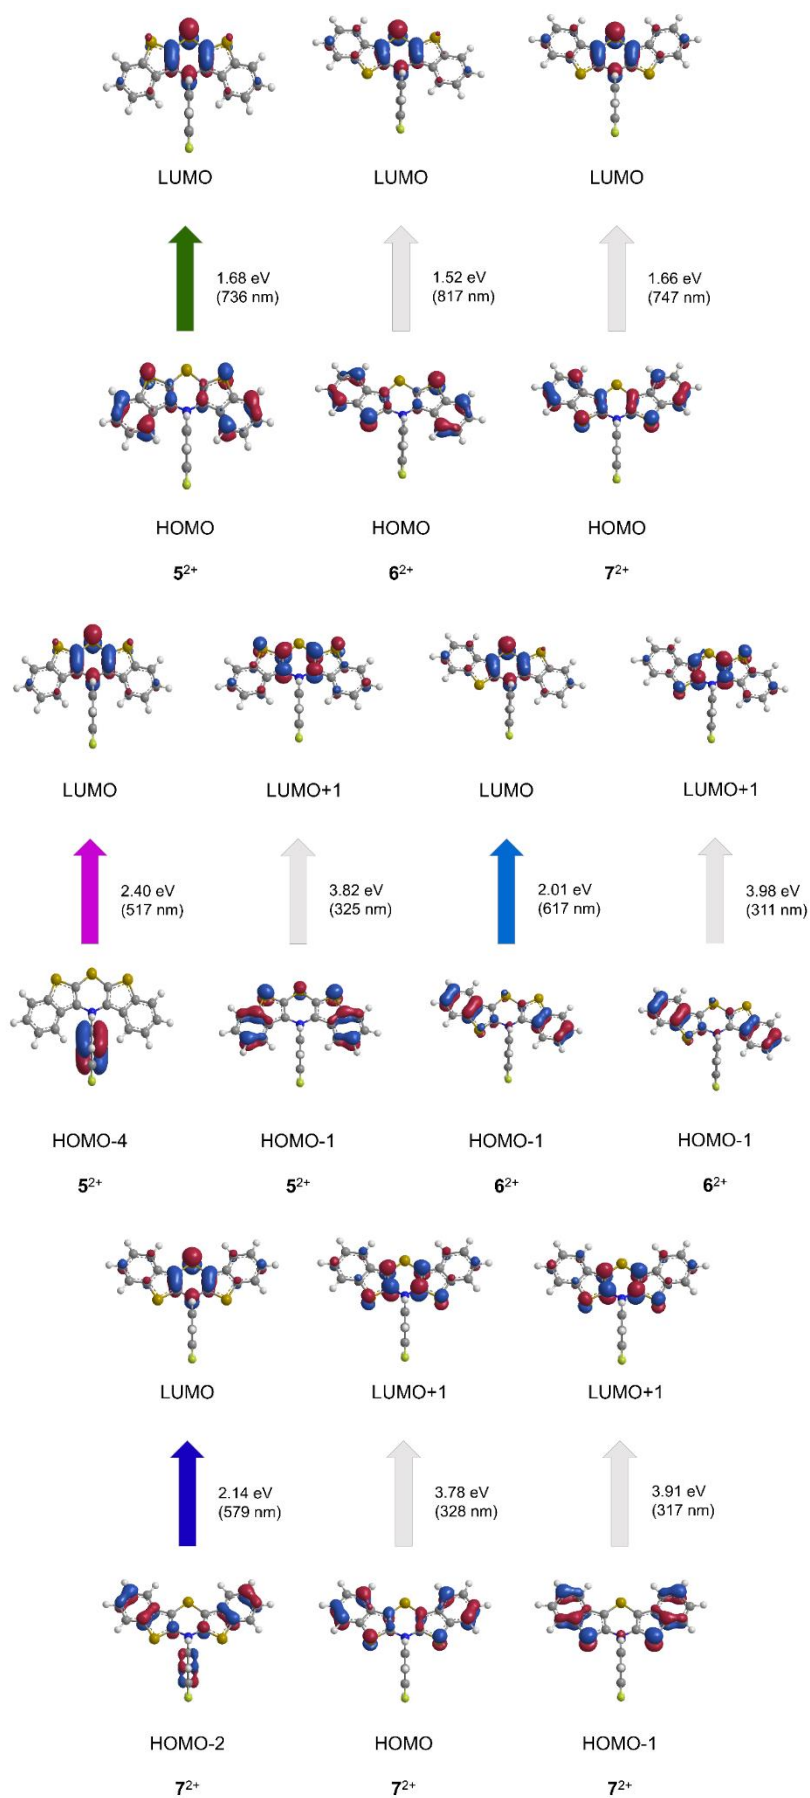

Figure S29: TDDFT calculated absorptions of dications  $5^{2+}$ ,  $6^{2+}$ , and  $7^{2+}$  illustrated by the relevant molecular orbital transitions (uB3LYP/6-311++G\*\*, IEFPCM CH<sub>2</sub>Cl<sub>2</sub>, isosurface value at 0.05 a.u.).



## 6.2 Computed zyx-coordinates of the $S_0$ state of compound **5** and excitation energies (B3LYP/6-311++G\*\*, IEFPCM $\text{CH}_2\text{Cl}_2$ )

Charge = 0 Multiplicity = 1

|   |          |          |          |
|---|----------|----------|----------|
| C | 1.30974  | -1.29262 | -1.23295 |
| C | 1.1888   | -0.47915 | -0.1461  |
| N | 0.00000  | 0.27872  | 0.08332  |
| C | -1.1888  | -0.47915 | -0.1461  |
| C | -1.30974 | -1.29262 | -1.23295 |
| S | 0.00000  | -1.54576 | -2.39995 |
| C | -2.32392 | -0.5562  | 0.74178  |
| C | -3.31876 | -1.42547 | 0.23897  |
| S | -2.81414 | -2.19705 | -1.26463 |
| S | 2.81414  | -2.19706 | -1.26463 |
| C | 3.31876  | -1.42547 | 0.23897  |
| C | 2.32392  | -0.5562  | 0.74178  |
| C | 0.00000  | 1.67543  | -0.20443 |
| C | 4.52198  | -1.63327 | 0.91523  |
| C | 4.71963  | -0.97332 | 2.12257  |
| C | 3.73395  | -0.11945 | 2.64649  |
| C | 2.54361  | 0.09447  | 1.96741  |
| C | -2.54361 | 0.09447  | 1.96741  |
| C | -3.73395 | -0.11945 | 2.64649  |
| C | -4.71963 | -0.97331 | 2.12257  |
| C | -4.52198 | -1.63326 | 0.91523  |
| C | -1.20606 | 2.38074  | -0.34183 |
| C | -1.20818 | 3.75149  | -0.5889  |
| C | 0.00000  | 4.41536  | -0.70391 |
| C | 1.20818  | 3.75149  | -0.5889  |
| C | 1.20606  | 2.38074  | -0.34183 |
| F | 0.00000  | 5.76     | -0.94581 |
| H | 5.27823  | -2.29904 | 0.51664  |
| H | 5.6439   | -1.12533 | 2.66759  |

|   |          |          |          |
|---|----------|----------|----------|
| H | 3.9081   | 0.37791  | 3.59359  |
| H | 1.78507  | 0.75482  | 2.37077  |
| H | -1.78507 | 0.75482  | 2.37077  |
| H | -3.9081  | 0.37791  | 3.59359  |
| H | -5.6439  | -1.12532 | 2.66759  |
| H | -5.27823 | -2.29904 | 0.51664  |
| H | -2.15361 | 1.86693  | -0.26487 |
| H | -2.14024 | 4.29242  | -0.69651 |
| H | 2.14024  | 4.29242  | -0.69651 |
| H | 2.15361  | 1.86693  | -0.26487 |

SCF Done: E(RB3LYP) = -2195.04828432 A.U. after 2 cycles

|                                              |              |
|----------------------------------------------|--------------|
| Sum of electronic and zero-point Energies=   | -2194.772350 |
| Sum of electronic and thermal Energies=      | -2194.751487 |
| Sum of electronic and thermal Enthalpies=    | -2194.750543 |
| Sum of electronic and thermal Free Energies= | -2194.822931 |

Excitation energies and oscillator strengths:

Excited State 1: Singlet-A 3.5750 eV 346.81 nm f=0.0449 <S\*\*2>=0.000  
104 ->106 0.69941

This state for optimization and/or second-order correction.

Total Energy, E(TD-HF/TD-KS) = -2194.91690685

Copying the excited state density for this state as the 1-particle RhoCI density.

Excited State 2: Singlet-A 3.6551 eV 339.21 nm f=0.0749 <S\*\*2>=0.000  
103 ->106 -0.10708  
104 ->105 0.68703

Excited State 3: Singlet-A 4.1939 eV 295.63 nm f=0.0026 <S\*\*2>=0.000  
103 ->105 -0.11408  
104 ->107 0.68182

Excited State 4: Singlet-A 4.2496 eV 291.75 nm f=0.0975 <S\*\*2>=0.000  
102 ->106 0.58517  
103 ->105 -0.35194

Excited State 5: Singlet-A 4.2600 eV 291.04 nm f=0.0205 <S\*\*2>=0.000  
102 ->105 0.54044

|                   |           |           |           |          |              |  |
|-------------------|-----------|-----------|-----------|----------|--------------|--|
| 103 ->106         | -0.38250  |           |           |          |              |  |
| 104 ->108         | -0.17060  |           |           |          |              |  |
| Excited State 6:  | Singlet-A | 4.3028 eV | 288.15 nm | f=0.0944 | <S**2>=0.000 |  |
| 102 ->106         | 0.36355   |           |           |          |              |  |
| 103 ->105         | 0.57943   |           |           |          |              |  |
| Excited State 7:  | Singlet-A | 4.3389 eV | 285.75 nm | f=0.0106 | <S**2>=0.000 |  |
| 100 ->106         | -0.10254  |           |           |          |              |  |
| 101 ->105         | -0.13727  |           |           |          |              |  |
| 102 ->105         | 0.21905   |           |           |          |              |  |
| 104 ->108         | 0.63698   |           |           |          |              |  |
| Excited State 8:  | Singlet-A | 4.4582 eV | 278.10 nm | f=0.1887 | <S**2>=0.000 |  |
| 102 ->105         | 0.36503   |           |           |          |              |  |
| 102 ->108         | 0.11417   |           |           |          |              |  |
| 103 ->106         | 0.52861   |           |           |          |              |  |
| 104 ->105         | 0.11664   |           |           |          |              |  |
| 104 ->108         | -0.12380  |           |           |          |              |  |
| Excited State 9:  | Singlet-A | 4.4964 eV | 275.74 nm | f=0.0012 | <S**2>=0.000 |  |
| 100 ->105         | 0.13387   |           |           |          |              |  |
| 101 ->106         | 0.26071   |           |           |          |              |  |
| 103 ->108         | -0.14165  |           |           |          |              |  |
| 104 ->109         | 0.59980   |           |           |          |              |  |
| Excited State 10: | Singlet-A | 4.5956 eV | 269.79 nm | f=0.0005 | <S**2>=0.000 |  |
| 100 ->106         | 0.11391   |           |           |          |              |  |
| 101 ->105         | 0.57540   |           |           |          |              |  |
| 102 ->108         | -0.14537  |           |           |          |              |  |
| 103 ->106         | 0.14283   |           |           |          |              |  |
| 103 ->107         | 0.14694   |           |           |          |              |  |
| 104 ->108         | 0.19706   |           |           |          |              |  |
| 104 ->110         | 0.16512   |           |           |          |              |  |
| Excited State 11: | Singlet-A | 4.6009 eV | 269.48 nm | f=0.0067 | <S**2>=0.000 |  |
| 101 ->106         | -0.22795  |           |           |          |              |  |
| 104 ->109         | 0.15617   |           |           |          |              |  |
| 104 ->111         | 0.59573   |           |           |          |              |  |

|                   |           |           |           |          |              |
|-------------------|-----------|-----------|-----------|----------|--------------|
| 104 ->114         | -0.12373  |           |           |          |              |
| Excited State 12: | Singlet-A | 4.6140 eV | 268.71 nm | f=0.0781 | <S**2>=0.000 |
| 101 ->105         | -0.15246  |           |           |          |              |
| 103 ->111         | -0.10807  |           |           |          |              |
| 104 ->110         | 0.64058   |           |           |          |              |
| Excited State 13: | Singlet-A | 4.6424 eV | 267.07 nm | f=0.0362 | <S**2>=0.000 |
| 100 ->105         | 0.12063   |           |           |          |              |
| 101 ->106         | 0.48851   |           |           |          |              |
| 102 ->107         | 0.11936   |           |           |          |              |
| 102 ->109         | 0.11936   |           |           |          |              |
| 104 ->109         | -0.30546  |           |           |          |              |
| 104 ->111         | 0.27576   |           |           |          |              |
| Excited State 14: | Singlet-A | 4.8314 eV | 256.62 nm | f=0.0145 | <S**2>=0.000 |
| 100 ->106         | 0.29166   |           |           |          |              |
| 101 ->105         | -0.26626  |           |           |          |              |
| 102 ->108         | -0.11355  |           |           |          |              |
| 103 ->107         | 0.54209   |           |           |          |              |
| Excited State 15: | Singlet-A | 4.8460 eV | 255.85 nm | f=0.0576 | <S**2>=0.000 |
| 100 ->105         | 0.30262   |           |           |          |              |
| 101 ->106         | -0.26890  |           |           |          |              |
| 102 ->107         | 0.51554   |           |           |          |              |
| 103 ->108         | -0.16002  |           |           |          |              |
| Excited State 16: | Singlet-A | 4.8847 eV | 253.82 nm | f=0.0287 | <S**2>=0.000 |
| 100 ->105         | 0.42460   |           |           |          |              |
| 101 ->106         | -0.15367  |           |           |          |              |
| 102 ->107         | -0.40000  |           |           |          |              |
| 102 ->109         | 0.13794   |           |           |          |              |
| 103 ->108         | -0.29529  |           |           |          |              |
| Excited State 17: | Singlet-A | 4.9194 eV | 252.03 nm | f=0.0184 | <S**2>=0.000 |
| 100 ->106         | -0.17525  |           |           |          |              |
| 104 ->110         | -0.11438  |           |           |          |              |
| 104 ->112         | 0.52060   |           |           |          |              |
| 104 ->113         | -0.38763  |           |           |          |              |

Excited State 18: Singlet-A 4.9717 eV 249.38 nm f=0.0409 <S\*\*2>=0.000

|           |          |
|-----------|----------|
| 100 ->106 | 0.26938  |
| 101 ->105 | -0.10716 |
| 103 ->107 | -0.16202 |
| 103 ->109 | 0.14769  |
| 103 ->111 | 0.13837  |
| 104 ->112 | 0.41669  |
| 104 ->113 | 0.34795  |
| 104 ->115 | 0.12032  |

Excited State 19: Singlet-A 4.9930 eV 248.32 nm f=0.0668 <S\*\*2>=0.000

|           |          |
|-----------|----------|
| 100 ->106 | -0.22155 |
| 101 ->108 | -0.10334 |
| 102 ->108 | 0.27246  |
| 103 ->107 | 0.31510  |
| 103 ->109 | -0.24796 |
| 104 ->112 | 0.11741  |
| 104 ->113 | 0.32556  |
| 104 ->115 | 0.22095  |

Excited State 20: Singlet-A 5.0020 eV 247.87 nm f=0.0230 <S\*\*2>=0.000

|           |          |
|-----------|----------|
| 101 ->111 | 0.18187  |
| 103 ->110 | 0.44571  |
| 103 ->113 | -0.10291 |
| 104 ->114 | -0.38078 |
| 104 ->118 | 0.19395  |
| 104 ->122 | 0.11041  |

Excited State 21: Singlet-A 5.0629 eV 244.89 nm f=0.1035 <S\*\*2>=0.000

|           |          |
|-----------|----------|
| 100 ->106 | 0.19734  |
| 102 ->108 | 0.14480  |
| 103 ->107 | -0.14786 |
| 103 ->111 | -0.27372 |
| 104 ->110 | -0.12324 |
| 104 ->113 | -0.21277 |
| 104 ->115 | 0.48377  |

Excited State 22: Singlet-A 5.0654 eV 244.77 nm f=0.2692 <S\*\*2>=0.000

|           |          |
|-----------|----------|
| 100 ->105 | 0.37764  |
| 103 ->108 | 0.53977  |
| 103 ->110 | -0.11691 |

Excited State 23: Singlet-A 5.1244 eV 241.95 nm f=0.0504 <S\*\*2>=0.000

|           |          |
|-----------|----------|
| 100 ->106 | 0.21698  |
| 102 ->108 | 0.56014  |
| 102 ->110 | -0.10031 |
| 103 ->109 | 0.16932  |
| 103 ->111 | 0.13288  |
| 104 ->115 | -0.19530 |

Excited State 24: Singlet-A 5.1528 eV 240.62 nm f=0.0128 <S\*\*2>=0.000

|           |          |
|-----------|----------|
| 101 ->110 | 0.25717  |
| 102 ->110 | 0.16302  |
| 103 ->109 | -0.12340 |
| 103 ->111 | 0.47005  |
| 104 ->113 | -0.16564 |
| 104 ->115 | 0.27732  |

Excited State 25: Singlet-A 5.1682 eV 239.90 nm f=0.0413 <S\*\*2>=0.000

|           |          |
|-----------|----------|
| 101 ->111 | 0.15536  |
| 103 ->108 | 0.13568  |
| 103 ->110 | 0.36621  |
| 104 ->111 | 0.15609  |
| 104 ->114 | 0.47481  |
| 104 ->118 | -0.10611 |

Excited State 26: Singlet-A 5.2277 eV 237.17 nm f=0.0124 <S\*\*2>=0.000

|           |          |
|-----------|----------|
| 99 ->105  | 0.11057  |
| 100 ->105 | -0.11696 |
| 102 ->107 | 0.10299  |
| 102 ->109 | 0.58123  |
| 102 ->111 | -0.23309 |

Excited State 27: Singlet-A 5.2601 eV 235.71 nm f=0.0803 <S\*\*2>=0.000

|           |          |
|-----------|----------|
| 100 ->106 | -0.27259 |
|-----------|----------|

|                   |           |           |           |          |              |  |
|-------------------|-----------|-----------|-----------|----------|--------------|--|
| 102 ->110         | 0.14923   |           |           |          |              |  |
| 102 ->113         | -0.11012  |           |           |          |              |  |
| 103 ->109         | 0.56391   |           |           |          |              |  |
| 104 ->115         | 0.11715   |           |           |          |              |  |
| Excited State 28: | Singlet-A | 5.2606 eV | 235.69 nm | f=0.0663 | <S**2>=0.000 |  |
| 101 ->107         | 0.46361   |           |           |          |              |  |
| 102 ->109         | -0.21836  |           |           |          |              |  |
| 102 ->111         | -0.37810  |           |           |          |              |  |
| 103 ->110         | 0.18490   |           |           |          |              |  |
| Excited State 29: | Singlet-A | 5.2696 eV | 235.28 nm | f=0.0627 | <S**2>=0.000 |  |
| 100 ->106         | 0.15808   |           |           |          |              |  |
| 102 ->110         | 0.59212   |           |           |          |              |  |
| 103 ->111         | -0.19336  |           |           |          |              |  |
| 104 ->115         | -0.14149  |           |           |          |              |  |
| Excited State 30: | Singlet-A | 5.3058 eV | 233.68 nm | f=0.0011 | <S**2>=0.000 |  |
| 101 ->107         | 0.46984   |           |           |          |              |  |
| 102 ->107         | 0.10977   |           |           |          |              |  |
| 102 ->109         | 0.12634   |           |           |          |              |  |
| 102 ->111         | 0.42687   |           |           |          |              |  |
| Excited State 31: | Singlet-A | 5.4166 eV | 228.90 nm | f=0.0047 | <S**2>=0.000 |  |
| 99 ->106          | -0.16846  |           |           |          |              |  |
| 101 ->110         | -0.10758  |           |           |          |              |  |
| 102 ->112         | -0.19455  |           |           |          |              |  |
| 102 ->113         | 0.12169   |           |           |          |              |  |
| 103 ->114         | -0.11384  |           |           |          |              |  |
| 104 ->116         | 0.13622   |           |           |          |              |  |
| 104 ->117         | 0.57113   |           |           |          |              |  |
| Excited State 32: | Singlet-A | 5.4241 eV | 228.58 nm | f=0.0176 | <S**2>=0.000 |  |
| 99 ->105          | 0.49673   |           |           |          |              |  |
| 103 ->110         | -0.11580  |           |           |          |              |  |
| 103 ->112         | 0.21217   |           |           |          |              |  |
| 103 ->113         | -0.15632  |           |           |          |              |  |
| 104 ->114         | 0.13042   |           |           |          |              |  |

104 ->118 0.32687

Excited State 33: Singlet-A 5.4279 eV 228.42 nm f=0.0004 <S\*\*2>=0.000

99 ->105 0.46127

102 ->109 -0.11190

103 ->112 -0.19925

104 ->114 -0.15076

104 ->118 -0.37666

104 ->119 -0.12083

104 ->122 -0.10332

Excited State 34: Singlet-A 5.4334 eV 228.19 nm f=0.0118 <S\*\*2>=0.000

99 ->106 0.55680

101 ->108 -0.19496

104 ->116 0.34083

Excited State 35: Singlet-A 5.4435 eV 227.77 nm f=0.0139 <S\*\*2>=0.000

99 ->106 -0.31864

101 ->110 0.10146

102 ->112 -0.13798

102 ->113 -0.12412

104 ->116 0.52100

104 ->117 -0.19675

SavETr: write IOETrn= 770 NScale= 10 NData= 16 NLR=1 LETran= 640.

Leave Link 914 at Tue Jan 5 20:00:31 2021, MaxMem= 1610612736 cpu: 45551.7

(Enter /software/gaussian/g09/ivybridge\_xe2015/g09/l601.exe)

Copying SCF densities to generalized density rwf, IOpCl= 0 IROHF=0.

### 6.3 Computed zyx-coordinates of the S<sub>0</sub> state of compound **6** and excitation energies (B3LYP/6-311++G\*\*, IEFPCM CH<sub>2</sub>Cl<sub>2</sub>)

Charge = 0 Multiplicity = 1

|   |          |          |          |
|---|----------|----------|----------|
| C | -0.40793 | -1.85991 | 0.77493  |
| C | -0.94282 | -0.87539 | -0.0004  |
| N | -0.2691  | 0.34458  | -0.29153 |
| C | 1.13535  | 0.27366  | -0.28737 |



|   |          |          |          |
|---|----------|----------|----------|
| C | 1.89606  | -0.61642 | 0.4059   |
| S | 1.17991  | -1.78522 | 1.55195  |
| S | -1.42276 | -3.28986 | 0.88318  |
| C | -2.64462 | -2.51431 | -0.12172 |
| C | -2.23135 | -1.23272 | -0.55087 |
| S | 2.11588  | 1.29034  | -1.35808 |
| C | 3.58792  | 0.51246  | -0.78944 |
| C | 3.30801  | -0.51951 | 0.13694  |
| C | -0.90573 | 1.58239  | 0.09786  |
| C | -0.93328 | 2.66179  | -0.78768 |
| C | -1.53209 | 3.86368  | -0.41561 |
| C | -2.11796 | 3.94973  | 0.83645  |
| C | -2.12422 | 2.89104  | 1.73039  |
| C | -1.50451 | 1.70191  | 1.35482  |
| F | -2.71601 | 5.11673  | 1.20024  |
| C | -3.86777 | -3.0622  | -0.50997 |
| C | -4.68616 | -2.31667 | -1.35095 |
| C | -4.28657 | -1.04716 | -1.79949 |
| C | -3.0721  | -0.50201 | -1.40766 |
| C | 4.89409  | 0.82054  | -1.16988 |
| C | 5.9344   | 0.07464  | -0.62555 |
| C | 5.67434  | -0.95887 | 0.28835  |
| C | 4.37472  | -1.25876 | 0.67346  |
| H | -0.50104 | 2.56438  | -1.77577 |
| H | -1.55986 | 4.7106   | -1.08945 |
| H | -2.59338 | 2.99998  | 2.70015  |
| H | -1.48709 | 0.86467  | 2.04184  |
| H | -4.16967 | -4.04619 | -0.17119 |
| H | -5.63974 | -2.72399 | -1.66601 |
| H | -4.93666 | -0.48573 | -2.46051 |
| H | -2.77222 | 0.47783  | -1.75715 |
| H | 5.09474  | 1.61617  | -1.87755 |
| H | 6.95569  | 0.29432  | -0.91391 |

H 6.49939 -1.52911 0.69913

H 4.18253 -2.05742 1.38093

SCF Done: E(RB3LYP) = -2195.04961264 A.U. after 2 cycles

Sum of electronic and zero-point Energies= -2194.773991

Sum of electronic and thermal Energies= -2194.752958

Sum of electronic and thermal Enthalpies= -2194.752013

Sum of electronic and thermal Free Energies= -2194.825650

Excitation energies and oscillator strengths:

Excited State 1: Singlet-A 3.2447 eV 382.12 nm f=0.0076 <S\*\*2>=0.000  
104 ->105 0.69517

This state for optimization and/or second-order correction.

Total Energy, E(TD-HF/TD-KS) = -2194.93037336

Copying the excited state density for this state as the 1-particle RhoCI density.

Excited State 2: Singlet-A 3.7115 eV 334.05 nm f=0.0373 <S\*\*2>=0.000  
104 ->106 -0.35516  
104 ->107 0.59039

Excited State 3: Singlet-A 3.7498 eV 330.64 nm f=0.1427 <S\*\*2>=0.000  
104 ->106 0.58398  
104 ->107 0.36770

Excited State 4: Singlet-A 3.9326 eV 315.27 nm f=0.0402 <S\*\*2>=0.000  
104 ->108 0.54708  
104 ->109 0.36139  
104 ->110 0.16544  
104 ->111 -0.15952

Excited State 5: Singlet-A 3.9938 eV 310.44 nm f=0.0046 <S\*\*2>=0.000  
104 ->108 -0.43431  
104 ->109 0.45990  
104 ->110 0.13751  
104 ->111 -0.21986

Excited State 6: Singlet-A 4.1263 eV 300.47 nm f=0.0044 <S\*\*2>=0.000  
104 ->109 -0.28212  
104 ->110 0.60448

|                   |           |           |           |          |              |  |
|-------------------|-----------|-----------|-----------|----------|--------------|--|
| 104 ->111         | -0.14169  |           |           |          |              |  |
| Excited State 7:  | Singlet-A | 4.2011 eV | 295.12 nm | f=0.0076 | <S**2>=0.000 |  |
| 104 ->109         | 0.21575   |           |           |          |              |  |
| 104 ->110         | 0.23705   |           |           |          |              |  |
| 104 ->111         | 0.60616   |           |           |          |              |  |
| Excited State 8:  | Singlet-A | 4.3336 eV | 286.10 nm | f=0.1027 | <S**2>=0.000 |  |
| 102 ->105         | -0.15061  |           |           |          |              |  |
| 103 ->105         | 0.62165   |           |           |          |              |  |
| 104 ->110         | 0.11622   |           |           |          |              |  |
| 104 ->112         | -0.13712  |           |           |          |              |  |
| Excited State 9:  | Singlet-A | 4.4626 eV | 277.83 nm | f=0.0189 | <S**2>=0.000 |  |
| 103 ->105         | 0.15157   |           |           |          |              |  |
| 104 ->112         | 0.60003   |           |           |          |              |  |
| 104 ->113         | -0.16112  |           |           |          |              |  |
| 104 ->116         | -0.12295  |           |           |          |              |  |
| 104 ->117         | -0.11789  |           |           |          |              |  |
| Excited State 10: | Singlet-A | 4.5810 eV | 270.65 nm | f=0.0104 | <S**2>=0.000 |  |
| 101 ->105         | -0.14204  |           |           |          |              |  |
| 102 ->105         | -0.15715  |           |           |          |              |  |
| 103 ->106         | -0.18434  |           |           |          |              |  |
| 104 ->113         | 0.59364   |           |           |          |              |  |
| 104 ->118         | 0.10016   |           |           |          |              |  |
| Excited State 11: | Singlet-A | 4.5901 eV | 270.11 nm | f=0.0073 | <S**2>=0.000 |  |
| 101 ->105         | 0.29429   |           |           |          |              |  |
| 102 ->105         | 0.10933   |           |           |          |              |  |
| 102 ->106         | -0.13094  |           |           |          |              |  |
| 103 ->106         | 0.44537   |           |           |          |              |  |
| 104 ->112         | 0.15906   |           |           |          |              |  |
| 104 ->113         | 0.24053   |           |           |          |              |  |
| 104 ->115         | 0.18050   |           |           |          |              |  |
| Excited State 12: | Singlet-A | 4.6089 eV | 269.01 nm | f=0.4647 | <S**2>=0.000 |  |
| 101 ->105         | -0.10942  |           |           |          |              |  |
| 102 ->105         | 0.62387   |           |           |          |              |  |

|                   |           |           |           |          |              |
|-------------------|-----------|-----------|-----------|----------|--------------|
| 103 ->105         | 0.14846   |           |           |          |              |
| 104 ->113         | 0.10420   |           |           |          |              |
| Excited State 13: | Singlet-A | 4.7304 eV | 262.10 nm | f=0.0223 | <S**2>=0.000 |
| 101 ->105         | 0.32003   |           |           |          |              |
| 103 ->106         | -0.31961  |           |           |          |              |
| 103 ->107         | 0.46156   |           |           |          |              |
| 103 ->109         | -0.13120  |           |           |          |              |
| 104 ->115         | 0.12162   |           |           |          |              |
| Excited State 14: | Singlet-A | 4.7478 eV | 261.14 nm | f=0.0174 | <S**2>=0.000 |
| 101 ->105         | -0.38493  |           |           |          |              |
| 103 ->106         | 0.30511   |           |           |          |              |
| 103 ->107         | 0.46481   |           |           |          |              |
| Excited State 15: | Singlet-A | 4.8381 eV | 256.27 nm | f=0.0171 | <S**2>=0.000 |
| 101 ->105         | -0.17835  |           |           |          |              |
| 102 ->106         | -0.12926  |           |           |          |              |
| 103 ->107         | -0.16943  |           |           |          |              |
| 104 ->113         | -0.10849  |           |           |          |              |
| 104 ->114         | 0.15716   |           |           |          |              |
| 104 ->115         | 0.49243   |           |           |          |              |
| 104 ->117         | 0.21954   |           |           |          |              |
| Excited State 16: | Singlet-A | 4.8696 eV | 254.61 nm | f=0.0317 | <S**2>=0.000 |
| 104 ->112         | -0.14653  |           |           |          |              |
| 104 ->114         | 0.58566   |           |           |          |              |
| 104 ->115         | -0.12264  |           |           |          |              |
| 104 ->117         | -0.16896  |           |           |          |              |
| 104 ->119         | 0.15724   |           |           |          |              |
| Excited State 17: | Singlet-A | 4.9030 eV | 252.87 nm | f=0.0268 | <S**2>=0.000 |
| 100 ->105         | 0.27344   |           |           |          |              |
| 101 ->106         | 0.24818   |           |           |          |              |
| 102 ->106         | 0.25584   |           |           |          |              |
| 102 ->107         | 0.27406   |           |           |          |              |
| 102 ->108         | -0.10681  |           |           |          |              |
| 103 ->109         | 0.32483   |           |           |          |              |

|                   |           |           |           |          |              |
|-------------------|-----------|-----------|-----------|----------|--------------|
| 104 ->114         | 0.13891   |           |           |          |              |
| 104 ->115         | 0.14425   |           |           |          |              |
| Excited State 18: | Singlet-A | 4.9288 eV | 251.55 nm | f=0.0224 | <S**2>=0.000 |
| 100 ->105         | -0.37045  |           |           |          |              |
| 101 ->105         | 0.19444   |           |           |          |              |
| 101 ->106         | -0.12116  |           |           |          |              |
| 102 ->106         | 0.45812   |           |           |          |              |
| 102 ->107         | -0.11043  |           |           |          |              |
| 103 ->108         | 0.15360   |           |           |          |              |
| 103 ->110         | -0.11526  |           |           |          |              |
| Excited State 19: | Singlet-A | 4.9619 eV | 249.87 nm | f=0.0050 | <S**2>=0.000 |
| 100 ->105         | 0.18180   |           |           |          |              |
| 101 ->107         | -0.14085  |           |           |          |              |
| 101 ->112         | -0.10559  |           |           |          |              |
| 102 ->106         | 0.23411   |           |           |          |              |
| 102 ->107         | -0.11922  |           |           |          |              |
| 103 ->107         | -0.10617  |           |           |          |              |
| 103 ->108         | -0.19561  |           |           |          |              |
| 103 ->109         | -0.26854  |           |           |          |              |
| 103 ->110         | -0.26115  |           |           |          |              |
| 103 ->111         | 0.33469   |           |           |          |              |
| Excited State 20: | Singlet-A | 4.9937 eV | 248.28 nm | f=0.0287 | <S**2>=0.000 |
| 100 ->105         | 0.31448   |           |           |          |              |
| 101 ->106         | -0.16412  |           |           |          |              |
| 102 ->107         | -0.11548  |           |           |          |              |
| 103 ->108         | 0.55739   |           |           |          |              |
| Excited State 21: | Singlet-A | 5.0110 eV | 247.42 nm | f=0.0464 | <S**2>=0.000 |
| 100 ->105         | 0.31315   |           |           |          |              |
| 101 ->106         | -0.28815  |           |           |          |              |
| 102 ->106         | 0.10550   |           |           |          |              |
| 102 ->107         | -0.27915  |           |           |          |              |
| 103 ->108         | -0.28982  |           |           |          |              |
| 103 ->109         | 0.15400   |           |           |          |              |

|                   |           |           |           |          |              |
|-------------------|-----------|-----------|-----------|----------|--------------|
| 103 ->111         | -0.27120  |           |           |          |              |
| Excited State 22: | Singlet-A | 5.0395 eV | 246.02 nm | f=0.0133 | <S**2>=0.000 |
| 101 ->106         | -0.32299  |           |           |          |              |
| 102 ->107         | 0.47456   |           |           |          |              |
| 102 ->108         | 0.11755   |           |           |          |              |
| 102 ->109         | -0.17352  |           |           |          |              |
| 103 ->109         | -0.12789  |           |           |          |              |
| 103 ->110         | -0.12111  |           |           |          |              |
| 104 ->116         | -0.15767  |           |           |          |              |
| Excited State 23: | Singlet-A | 5.0796 eV | 244.08 nm | f=0.0029 | <S**2>=0.000 |
| 102 ->107         | 0.14245   |           |           |          |              |
| 104 ->116         | 0.64210   |           |           |          |              |
| Excited State 24: | Singlet-A | 5.1294 eV | 241.71 nm | f=0.0025 | <S**2>=0.000 |
| 100 ->107         | -0.11232  |           |           |          |              |
| 101 ->107         | 0.41182   |           |           |          |              |
| 101 ->109         | -0.15714  |           |           |          |              |
| 101 ->111         | 0.17597   |           |           |          |              |
| 103 ->109         | 0.14518   |           |           |          |              |
| 103 ->110         | -0.17103  |           |           |          |              |
| 103 ->111         | 0.19899   |           |           |          |              |
| 103 ->112         | -0.24497  |           |           |          |              |
| Excited State 25: | Singlet-A | 5.1571 eV | 240.41 nm | f=0.0084 | <S**2>=0.000 |
| 100 ->107         | 0.10464   |           |           |          |              |
| 101 ->107         | -0.21240  |           |           |          |              |
| 102 ->106         | -0.10065  |           |           |          |              |
| 102 ->108         | 0.13947   |           |           |          |              |
| 102 ->109         | 0.12954   |           |           |          |              |
| 103 ->109         | 0.20859   |           |           |          |              |
| 103 ->110         | -0.20363  |           |           |          |              |
| 104 ->117         | 0.20862   |           |           |          |              |
| 104 ->118         | -0.18638  |           |           |          |              |
| 104 ->119         | 0.29528   |           |           |          |              |
| 104 ->120         | 0.21489   |           |           |          |              |

Excited State 26: Singlet-A 5.1910 eV 238.84 nm f=0.0760 <S\*\*2>=0.000

|           |          |
|-----------|----------|
| 100 ->107 | -0.10008 |
| 101 ->106 | 0.12755  |
| 101 ->107 | 0.20097  |
| 103 ->109 | -0.11646 |
| 103 ->110 | -0.22556 |
| 103 ->111 | -0.10501 |
| 104 ->114 | 0.14678  |
| 104 ->115 | -0.28974 |
| 104 ->117 | 0.38913  |

Excited State 27: Singlet-A 5.1993 eV 238.46 nm f=0.0494 <S\*\*2>=0.000

|           |          |
|-----------|----------|
| 101 ->106 | -0.12468 |
| 101 ->111 | 0.13030  |
| 102 ->106 | 0.12006  |
| 102 ->108 | -0.15036 |
| 103 ->110 | 0.35764  |
| 103 ->111 | 0.13165  |
| 103 ->112 | -0.15509 |
| 104 ->115 | -0.10106 |
| 104 ->117 | 0.37897  |
| 104 ->119 | 0.11379  |

Excited State 28: Singlet-A 5.2228 eV 237.39 nm f=0.1503 <S\*\*2>=0.000

|           |          |
|-----------|----------|
| 100 ->106 | 0.16220  |
| 100 ->107 | -0.20955 |
| 101 ->107 | 0.13760  |
| 103 ->109 | -0.22818 |
| 103 ->111 | -0.15922 |
| 104 ->114 | -0.10164 |
| 104 ->118 | -0.18229 |
| 104 ->119 | 0.40062  |

Excited State 29: Singlet-A 5.2450 eV 236.39 nm f=0.0030 <S\*\*2>=0.000

|           |          |
|-----------|----------|
| 98 ->105  | -0.10151 |
| 100 ->107 | 0.27580  |

|                   |           |           |           |          |              |
|-------------------|-----------|-----------|-----------|----------|--------------|
| 101 ->107         | 0.32402   |           |           |          |              |
| 102 ->108         | 0.33569   |           |           |          |              |
| 102 ->109         | 0.26157   |           |           |          |              |
| 102 ->110         | 0.12050   |           |           |          |              |
| 102 ->111         | -0.13371  |           |           |          |              |
| Excited State 30: | Singlet-A | 5.2594 eV | 235.74 nm | f=0.0413 | <S**2>=0.000 |
| 99 ->105          | 0.10982   |           |           |          |              |
| 99 ->108          | -0.12486  |           |           |          |              |
| 100 ->107         | 0.39000   |           |           |          |              |
| 102 ->107         | -0.11367  |           |           |          |              |
| 102 ->108         | -0.33288  |           |           |          |              |
| 102 ->109         | -0.12850  |           |           |          |              |
| 102 ->110         | -0.17293  |           |           |          |              |
| 103 ->110         | -0.14393  |           |           |          |              |
| 104 ->118         | -0.10125  |           |           |          |              |
| 104 ->119         | 0.14390   |           |           |          |              |
| Excited State 31: | Singlet-A | 5.2874 eV | 234.49 nm | f=0.0609 | <S**2>=0.000 |
| 101 ->106         | -0.22682  |           |           |          |              |
| 101 ->107         | 0.15515   |           |           |          |              |
| 101 ->109         | 0.14937   |           |           |          |              |
| 101 ->111         | -0.16104  |           |           |          |              |
| 102 ->108         | -0.16235  |           |           |          |              |
| 103 ->109         | 0.21234   |           |           |          |              |
| 103 ->111         | 0.28920   |           |           |          |              |
| 103 ->112         | 0.27267   |           |           |          |              |
| 104 ->119         | 0.10348   |           |           |          |              |
| 104 ->120         | -0.22214  |           |           |          |              |
| 104 ->121         | 0.10143   |           |           |          |              |
| Excited State 32: | Singlet-A | 5.2907 eV | 234.35 nm | f=0.0319 | <S**2>=0.000 |
| 101 ->107         | -0.13509  |           |           |          |              |
| 102 ->110         | 0.11525   |           |           |          |              |
| 103 ->110         | -0.15976  |           |           |          |              |
| 103 ->112         | -0.11183  |           |           |          |              |



|                   |           |           |           |          |              |
|-------------------|-----------|-----------|-----------|----------|--------------|
| 104 ->118         | 0.45936   |           |           |          |              |
| 104 ->119         | 0.28754   |           |           |          |              |
| 104 ->120         | -0.19292  |           |           |          |              |
| 104 ->121         | 0.14344   |           |           |          |              |
| Excited State 33: | Singlet-A | 5.3141 eV | 233.31 nm | f=0.0110 | <S**2>=0.000 |
| 102 ->108         | -0.13408  |           |           |          |              |
| 102 ->110         | -0.14083  |           |           |          |              |
| 103 ->110         | 0.10037   |           |           |          |              |
| 103 ->112         | 0.15400   |           |           |          |              |
| 104 ->118         | 0.38660   |           |           |          |              |
| 104 ->120         | 0.40178   |           |           |          |              |
| 104 ->123         | 0.16235   |           |           |          |              |
| Excited State 34: | Singlet-A | 5.3476 eV | 231.85 nm | f=0.0604 | <S**2>=0.000 |
| 100 ->106         | 0.31389   |           |           |          |              |
| 101 ->106         | -0.11249  |           |           |          |              |
| 102 ->108         | -0.26473  |           |           |          |              |
| 102 ->109         | 0.22711   |           |           |          |              |
| 102 ->110         | 0.15594   |           |           |          |              |
| 102 ->111         | -0.28699  |           |           |          |              |
| 103 ->110         | -0.16212  |           |           |          |              |
| 103 ->111         | -0.18416  |           |           |          |              |
| 104 ->119         | -0.18869  |           |           |          |              |
| Excited State 35: | Singlet-A | 5.3712 eV | 230.83 nm | f=0.1143 | <S**2>=0.000 |
| 100 ->106         | 0.47850   |           |           |          |              |
| 100 ->107         | 0.13121   |           |           |          |              |
| 101 ->108         | 0.18088   |           |           |          |              |
| 102 ->108         | 0.17205   |           |           |          |              |
| 102 ->109         | -0.21509  |           |           |          |              |
| 102 ->111         | 0.18825   |           |           |          |              |
| 103 ->109         | 0.11767   |           |           |          |              |
| 103 ->111         | 0.11886   |           |           |          |              |

SavETr: write IOETrn= 770 NScale= 10 NData= 16 NLR=1 LETran= 640.

Leave Link 914 at Tue Jan 5 21:06:48 2021, MaxMem= 1610612736 cpu: 44432.5

(Enter /software/gaussian/g09/ivybridge\_xe2015/g09/l601.exe)

Copying SCF densities to generalized density rwf, IOpCl= 0 IROHF=0.

#### 6.4 Computed zyx-coordinates of the S<sub>0</sub> state of compound **7** and excitation energies (B3LYP/6-311++G\*\*, IEFPCM CH<sub>2</sub>Cl<sub>2</sub>)

Charge = 0 Multiplicity = 1

|   |          |          |          |
|---|----------|----------|----------|
| C | 1.33373  | -1.33761 | 0.35053  |
| C | 1.19211  | -0.01004 | 0.07969  |
| N | 0.00000  | 0.71339  | 0.1536   |
| C | -1.19211 | -0.01004 | 0.07969  |
| C | -1.33374 | -1.3376  | 0.35053  |
| S | 0.00000  | -2.31908 | 1.02644  |
| C | 0.00000  | 2.15245  | 0.17192  |
| C | 0.00001  | 2.82364  | 1.39636  |
| C | 0.00001  | 4.21472  | 1.42833  |
| C | 0.00001  | 4.90028  | 0.2226   |
| C | 0.00001  | 4.26139  | -1.00678 |
| C | 0.00000  | 2.86831  | -1.02705 |
| C | -3.52269 | -0.81153 | -0.36511 |
| C | -2.65821 | -1.83511 | 0.09102  |
| S | -2.68054 | 0.72961  | -0.52259 |
| C | -4.86622 | -1.05332 | -0.64484 |
| C | -5.35436 | -2.3464  | -0.47689 |
| C | -4.51108 | -3.37643 | -0.03257 |
| C | -3.17445 | -3.13157 | 0.25456  |
| C | 2.6582   | -1.83512 | 0.09102  |
| C | 3.52269  | -0.81154 | -0.36511 |
| S | 2.68054  | 0.7296   | -0.52259 |
| C | 3.17444  | -3.13158 | 0.25456  |
| C | 4.51107  | -3.37645 | -0.03257 |
| C | 5.35435  | -2.34641 | -0.47689 |
| C | 4.86621  | -1.05333 | -0.64484 |

|   |          |          |          |
|---|----------|----------|----------|
| H | 0.00001  | 2.25538  | 2.31834  |
| H | 0.00001  | 4.7595   | 2.36377  |
| H | 0.00001  | 4.84002  | -1.92157 |
| H | 0.00000  | 2.34002  | -1.97258 |
| H | -5.51541 | -0.25731 | -0.99033 |
| H | -6.39507 | -2.55639 | -0.694   |
| H | -4.90921 | -4.37717 | 0.08984  |
| H | -2.53033 | -3.93305 | 0.59821  |
| H | 2.53031  | -3.93306 | 0.59821  |
| H | 4.90919  | -4.37718 | 0.08984  |
| H | 6.39506  | -2.55641 | -0.694   |
| H | 5.51541  | -0.25732 | -0.99033 |
| F | 0.00001  | 6.25744  | 0.24894  |

SCF Done: E(RB3LYP) = -2195.05316484 A.U. after 1 cycles

Sum of electronic and zero-point Energies= -2194.777705

Sum of electronic and thermal Energies= -2194.756501

Sum of electronic and thermal Enthalpies= -2194.755557

Sum of electronic and thermal Free Energies= -2194.830146

Excitation energies and oscillator strengths:

Excited State 1: Singlet-A 2.9408 eV 421.59 nm f=0.1437 <S\*\*2>=0.000

104 ->105 0.68850

104 ->106 0.10629

This state for optimization and/or second-order correction.

Total Energy, E(TD-HF/TD-KS) = -2194.94509074

Copying the excited state density for this state as the 1-particle RhoCI density.

Excited State 2: Singlet-A 3.2481 eV 381.71 nm f=0.0007 <S\*\*2>=0.000

104 ->105 -0.11542

104 ->106 0.68901

Excited State 3: Singlet-A 3.3948 eV 365.22 nm f=0.0049 <S\*\*2>=0.000

104 ->107 0.70149

Excited State 4: Singlet-A 3.7116 eV 334.05 nm f=0.0814 <S\*\*2>=0.000

103 ->105 -0.10463

|                   |           |           |           |          |              |
|-------------------|-----------|-----------|-----------|----------|--------------|
| 104 ->108         | 0.64714   |           |           |          |              |
| 104 ->109         | 0.12474   |           |           |          |              |
| 104 ->111         | -0.18964  |           |           |          |              |
| Excited State 5:  | Singlet-A | 3.7338 eV | 332.06 nm | f=0.0204 | <S**2>=0.000 |
| 104 ->110         | 0.64076   |           |           |          |              |
| 104 ->112         | -0.24139  |           |           |          |              |
| Excited State 6:  | Singlet-A | 3.7621 eV | 329.56 nm | f=0.0011 | <S**2>=0.000 |
| 104 ->108         | -0.13832  |           |           |          |              |
| 104 ->109         | 0.68456   |           |           |          |              |
| Excited State 7:  | Singlet-A | 3.9459 eV | 314.21 nm | f=0.0040 | <S**2>=0.000 |
| 104 ->110         | 0.26467   |           |           |          |              |
| 104 ->112         | 0.62743   |           |           |          |              |
| 104 ->115         | 0.14040   |           |           |          |              |
| Excited State 8:  | Singlet-A | 4.0145 eV | 308.84 nm | f=0.0266 | <S**2>=0.000 |
| 104 ->108         | 0.18808   |           |           |          |              |
| 104 ->111         | 0.60595   |           |           |          |              |
| 104 ->113         | 0.26504   |           |           |          |              |
| Excited State 9:  | Singlet-A | 4.2041 eV | 294.91 nm | f=0.0079 | <S**2>=0.000 |
| 104 ->111         | -0.26463  |           |           |          |              |
| 104 ->113         | 0.62810   |           |           |          |              |
| 104 ->116         | -0.13686  |           |           |          |              |
| Excited State 10: | Singlet-A | 4.4370 eV | 279.43 nm | f=0.1142 | <S**2>=0.000 |
| 102 ->109         | 0.10484   |           |           |          |              |
| 103 ->105         | 0.64759   |           |           |          |              |
| 104 ->114         | -0.12536  |           |           |          |              |
| Excited State 11: | Singlet-A | 4.4495 eV | 278.65 nm | f=0.1445 | <S**2>=0.000 |
| 102 ->105         | 0.63647   |           |           |          |              |
| 104 ->115         | -0.12654  |           |           |          |              |
| 104 ->118         | 0.17238   |           |           |          |              |
| Excited State 12: | Singlet-A | 4.5373 eV | 273.25 nm | f=0.0101 | <S**2>=0.000 |
| 103 ->105         | 0.13448   |           |           |          |              |
| 104 ->114         | 0.66924   |           |           |          |              |
| Excited State 13: | Singlet-A | 4.5825 eV | 270.56 nm | f=0.0066 | <S**2>=0.000 |

|                   |           |           |           |          |              |  |
|-------------------|-----------|-----------|-----------|----------|--------------|--|
| 103 ->106         | 0.68410   |           |           |          |              |  |
| Excited State 14: | Singlet-A | 4.6303 eV | 267.77 nm | f=0.1777 | <S**2>=0.000 |  |
| 102 ->105         | 0.18146   |           |           |          |              |  |
| 104 ->112         | -0.15027  |           |           |          |              |  |
| 104 ->115         | 0.59534   |           |           |          |              |  |
| 104 ->118         | -0.23198  |           |           |          |              |  |
| Excited State 15: | Singlet-A | 4.6826 eV | 264.78 nm | f=0.0016 | <S**2>=0.000 |  |
| 102 ->106         | 0.67324   |           |           |          |              |  |
| Excited State 16: | Singlet-A | 4.7383 eV | 261.66 nm | f=0.0020 | <S**2>=0.000 |  |
| 101 ->105         | -0.19767  |           |           |          |              |  |
| 102 ->108         | 0.15077   |           |           |          |              |  |
| 103 ->107         | 0.64157   |           |           |          |              |  |
| Excited State 17: | Singlet-A | 4.7968 eV | 258.47 nm | f=0.1173 | <S**2>=0.000 |  |
| 102 ->105         | -0.11029  |           |           |          |              |  |
| 104 ->115         | 0.27192   |           |           |          |              |  |
| 104 ->118         | 0.57058   |           |           |          |              |  |
| 104 ->120         | 0.21532   |           |           |          |              |  |
| Excited State 18: | Singlet-A | 4.8588 eV | 255.18 nm | f=0.0100 | <S**2>=0.000 |  |
| 104 ->113         | 0.11149   |           |           |          |              |  |
| 104 ->116         | 0.66745   |           |           |          |              |  |
| 104 ->117         | 0.10313   |           |           |          |              |  |
| Excited State 19: | Singlet-A | 4.8655 eV | 254.82 nm | f=0.0080 | <S**2>=0.000 |  |
| 102 ->107         | 0.67402   |           |           |          |              |  |
| 103 ->109         | 0.11590   |           |           |          |              |  |
| Excited State 20: | Singlet-A | 4.9049 eV | 252.77 nm | f=0.0497 | <S**2>=0.000 |  |
| 101 ->105         | 0.48170   |           |           |          |              |  |
| 102 ->108         | -0.18835  |           |           |          |              |  |
| 102 ->109         | -0.10638  |           |           |          |              |  |
| 103 ->107         | 0.26804   |           |           |          |              |  |
| 103 ->110         | 0.24810   |           |           |          |              |  |
| 103 ->112         | 0.13688   |           |           |          |              |  |
| 104 ->117         | -0.13956  |           |           |          |              |  |
| Excited State 21: | Singlet-A | 4.9274 eV | 251.62 nm | f=0.0680 | <S**2>=0.000 |  |

|                   |           |           |           |          |              |  |  |
|-------------------|-----------|-----------|-----------|----------|--------------|--|--|
| 102 ->106         | -0.10511  |           |           |          |              |  |  |
| 102 ->107         | -0.14329  |           |           |          |              |  |  |
| 102 ->110         | 0.20033   |           |           |          |              |  |  |
| 103 ->108         | 0.56959   |           |           |          |              |  |  |
| 103 ->109         | 0.19603   |           |           |          |              |  |  |
| 103 ->111         | -0.10894  |           |           |          |              |  |  |
| Excited State 22: | Singlet-A | 4.9395 eV | 251.01 nm | f=0.0010 | <S**2>=0.000 |  |  |
| 101 ->105         | 0.12129   |           |           |          |              |  |  |
| 104 ->117         | 0.65845   |           |           |          |              |  |  |
| Excited State 23: | Singlet-A | 5.0120 eV | 247.37 nm | f=0.0019 | <S**2>=0.000 |  |  |
| 101 ->105         | 0.24451   |           |           |          |              |  |  |
| 101 ->106         | 0.24808   |           |           |          |              |  |  |
| 102 ->108         | 0.45390   |           |           |          |              |  |  |
| 102 ->111         | -0.24094  |           |           |          |              |  |  |
| 103 ->110         | 0.10348   |           |           |          |              |  |  |
| 103 ->112         | -0.19230  |           |           |          |              |  |  |
| Excited State 24: | Singlet-A | 5.0377 eV | 246.11 nm | f=0.0067 | <S**2>=0.000 |  |  |
| 104 ->119         | 0.67407   |           |           |          |              |  |  |
| Excited State 25: | Singlet-A | 5.0559 eV | 245.23 nm | f=0.0562 | <S**2>=0.000 |  |  |
| 100 ->105         | -0.15478  |           |           |          |              |  |  |
| 101 ->108         | 0.14229   |           |           |          |              |  |  |
| 102 ->112         | -0.10460  |           |           |          |              |  |  |
| 103 ->108         | -0.15957  |           |           |          |              |  |  |
| 103 ->109         | 0.40496   |           |           |          |              |  |  |
| 104 ->118         | -0.13203  |           |           |          |              |  |  |
| 104 ->120         | 0.39851   |           |           |          |              |  |  |
| 104 ->122         | 0.10490   |           |           |          |              |  |  |
| 104 ->127         | -0.16085  |           |           |          |              |  |  |
| Excited State 26: | Singlet-A | 5.1004 eV | 243.09 nm | f=0.1292 | <S**2>=0.000 |  |  |
| 101 ->108         | -0.11327  |           |           |          |              |  |  |
| 103 ->108         | 0.22497   |           |           |          |              |  |  |
| 103 ->109         | -0.34687  |           |           |          |              |  |  |
| 104 ->118         | -0.13751  |           |           |          |              |  |  |

|                   |           |           |           |          |              |
|-------------------|-----------|-----------|-----------|----------|--------------|
| 104 ->120         | 0.50316   |           |           |          |              |
| Excited State 27: | Singlet-A | 5.1064 eV | 242.80 nm | f=0.0171 | <S**2>=0.000 |
| 101 ->105         | -0.27522  |           |           |          |              |
| 101 ->106         | 0.34981   |           |           |          |              |
| 102 ->108         | -0.25766  |           |           |          |              |
| 102 ->111         | -0.13501  |           |           |          |              |
| 103 ->110         | 0.39949   |           |           |          |              |
| 103 ->112         | -0.12143  |           |           |          |              |
| Excited State 28: | Singlet-A | 5.1530 eV | 240.61 nm | f=0.0048 | <S**2>=0.000 |
| 101 ->106         | 0.48800   |           |           |          |              |
| 103 ->110         | -0.36250  |           |           |          |              |
| 103 ->112         | 0.27465   |           |           |          |              |
| Excited State 29: | Singlet-A | 5.1615 eV | 240.21 nm | f=0.0015 | <S**2>=0.000 |
| 100 ->105         | -0.29517  |           |           |          |              |
| 100 ->106         | -0.11598  |           |           |          |              |
| 101 ->109         | -0.11082  |           |           |          |              |
| 102 ->110         | 0.16420   |           |           |          |              |
| 102 ->112         | 0.17462   |           |           |          |              |
| 103 ->109         | -0.13609  |           |           |          |              |
| 103 ->111         | 0.40852   |           |           |          |              |
| 103 ->113         | 0.15060   |           |           |          |              |
| 104 ->118         | 0.16059   |           |           |          |              |
| 104 ->122         | 0.19276   |           |           |          |              |
| 104 ->127         | -0.12643  |           |           |          |              |
| Excited State 30: | Singlet-A | 5.2198 eV | 237.53 nm | f=0.0428 | <S**2>=0.000 |
| 100 ->105         | 0.32953   |           |           |          |              |
| 102 ->110         | -0.11235  |           |           |          |              |
| 103 ->108         | 0.12250   |           |           |          |              |
| 104 ->122         | 0.51269   |           |           |          |              |
| 104 ->127         | -0.24263  |           |           |          |              |
| Excited State 31: | Singlet-A | 5.2392 eV | 236.64 nm | f=0.0363 | <S**2>=0.000 |
| 98 ->107          | 0.22808   |           |           |          |              |
| 99 ->105          | 0.17471   |           |           |          |              |

|                   |           |           |           |          |              |  |
|-------------------|-----------|-----------|-----------|----------|--------------|--|
| 99 ->106          | -0.31169  |           |           |          |              |  |
| 101 ->107         | 0.43819   |           |           |          |              |  |
| 102 ->108         | -0.20327  |           |           |          |              |  |
| 102 ->109         | 0.13778   |           |           |          |              |  |
| 102 ->111         | -0.16481  |           |           |          |              |  |
| Excited State 32: | Singlet-A | 5.2545 eV | 235.96 nm | f=0.0037 | <S**2>=0.000 |  |
| 102 ->109         | -0.28007  |           |           |          |              |  |
| 103 ->112         | -0.11160  |           |           |          |              |  |
| 104 ->123         | 0.55737   |           |           |          |              |  |
| 104 ->124         | 0.16250   |           |           |          |              |  |
| Excited State 33: | Singlet-A | 5.2594 eV | 235.74 nm | f=0.0484 | <S**2>=0.000 |  |
| 100 ->105         | 0.32048   |           |           |          |              |  |
| 101 ->111         | 0.11054   |           |           |          |              |  |
| 102 ->110         | -0.20746  |           |           |          |              |  |
| 102 ->112         | 0.26905   |           |           |          |              |  |
| 103 ->108         | 0.11578   |           |           |          |              |  |
| 103 ->109         | 0.23902   |           |           |          |              |  |
| 103 ->111         | 0.33544   |           |           |          |              |  |
| 104 ->122         | -0.17953  |           |           |          |              |  |
| Excited State 34: | Singlet-A | 5.3001 eV | 233.93 nm | f=0.0089 | <S**2>=0.000 |  |
| 104 ->121         | 0.66455   |           |           |          |              |  |
| 104 ->124         | -0.11171  |           |           |          |              |  |
| Excited State 35: | Singlet-A | 5.3179 eV | 233.15 nm | f=0.1466 | <S**2>=0.000 |  |
| 99 ->106          | -0.15798  |           |           |          |              |  |
| 101 ->106         | 0.17702   |           |           |          |              |  |
| 101 ->107         | 0.16192   |           |           |          |              |  |
| 102 ->108         | 0.17678   |           |           |          |              |  |
| 102 ->109         | -0.27584  |           |           |          |              |  |
| 102 ->111         | 0.29711   |           |           |          |              |  |
| 103 ->110         | 0.16876   |           |           |          |              |  |
| 103 ->112         | 0.15812   |           |           |          |              |  |
| 104 ->121         | 0.15088   |           |           |          |              |  |
| 104 ->123         | -0.25291  |           |           |          |              |  |



SavETr: write IOETrn= 770 NScale= 10 NData= 16 NLR=1 LETran= 640.

Leave Link 914 at Tue Jan 5 21:40:11 2021, MaxMem= 1610612736 cpu: 41077.6

(Enter /software/gaussian/g09/ivybridge\_xe2015/g09/l601.exe)

Copying SCF densities to generalized density rwf, IOpCl= 0 IROHF=0.

## 6.5 Computed zyx-coordinates of the $D_0$ state of compound $5^{*+}$ and excitation energies (uB3LYP/6-311++G\*\*, IEFPCM $CH_2Cl_2$ )

Charge = 1 Multiplicity = 2

|   |          |          |          |
|---|----------|----------|----------|
| C | 1.30999  | -2.14913 | -0.0002  |
| C | 1.22699  | -0.75866 | 0.00001  |
| N | 0.00000  | -0.09237 | 0.00000  |
| C | -1.22698 | -0.75867 | -0.00001 |
| C | -1.30997 | -2.14914 | 0.0002   |
| S | 0.00002  | -3.27944 | 0.00000  |
| C | -2.56174 | -0.15273 | -0.00009 |
| C | -3.56759 | -1.15062 | 0.00013  |
| S | -2.92461 | -2.78068 | 0.00043  |
| S | 2.92464  | -2.78066 | -0.00043 |
| C | 3.56761  | -1.15059 | -0.00013 |
| C | 2.56174  | -0.15271 | 0.00009  |
| C | -0.00001 | 1.35639  | 0.00000  |
| C | 4.93072  | -0.86321 | -0.0001  |
| C | 5.32242  | 0.46709  | 0.00017  |
| C | 4.35688  | 1.48131  | 0.00041  |
| C | 3.00169  | 1.18967  | 0.00038  |
| C | -3.0017  | 1.18964  | -0.00038 |
| C | -4.35689 | 1.48127  | -0.00042 |
| C | -5.32242 | 0.46705  | -0.00017 |
| C | -4.9307  | -0.86325 | 0.0001   |
| C | 0.00006  | 2.03558  | -1.2155  |
| C | 0.00004  | 3.42742  | -1.21921 |
| C | -0.00003 | 4.09076  | 0.00000  |

|   |          |          |          |
|---|----------|----------|----------|
| C | -0.00009 | 3.42742  | 1.21921  |
| C | -0.00008 | 2.03558  | 1.2155   |
| F | -0.00004 | 5.44186  | 0.00000  |
| H | 5.66287  | -1.66139 | -0.00026 |
| H | 6.37612  | 0.71797  | 0.00022  |
| H | 4.66877  | 2.51854  | 0.00062  |
| H | 2.307    | 2.01023  | 0.00061  |
| H | -2.30701 | 2.01021  | -0.00062 |
| H | -4.66878 | 2.51851  | -0.00064 |
| H | -6.37612 | 0.71792  | -0.00022 |
| H | -5.66285 | -1.66144 | 0.00026  |
| H | 0.0001   | 1.48547  | -2.14809 |
| H | 0.00009  | 3.9891   | -2.14418 |
| H | -0.00015 | 3.98909  | 2.14419  |
| H | -0.00012 | 1.48547  | 2.1481   |

SCF Done: E(UB3LYP) = -2194.84500198 A.U. after 2 cycles

Sum of electronic and zero-point Energies= -2194.568632

Sum of electronic and thermal Energies= -2194.547872

Sum of electronic and thermal Enthalpies= -2194.546928

Sum of electronic and thermal Free Energies= -2194.619648

Excitation energies and oscillator strengths:

Excited State 1: 2.012-A 1.8542 eV 668.67 nm f=0.0024 <S\*\*2>=0.762

102B ->104B 0.99311

This state for optimization and/or second-order correction.

Total Energy, E(TD-HF/TD-KS) = -2194.79068908

Copying the excited state density for this state as the 1-particle RhoCI density.

Excited State 2: 2.019-A 1.8633 eV 665.40 nm f=0.1905 <S\*\*2>=0.769

103B ->104B 0.99374

Excited State 3: 2.035-A 2.3146 eV 535.65 nm f=0.0416 <S\*\*2>=0.785

104A ->105A 0.62578

101B ->104B 0.76066

Excited State 4: 2.094-A 2.5007 eV 495.80 nm f=0.0070 <S\*\*2>=0.847  
104A ->105A 0.74332  
101B ->104B -0.63448

Excited State 5: 2.013-A 2.7494 eV 450.95 nm f=0.0000 <S\*\*2>=0.763  
100B ->104B 0.99706

Excited State 6: 2.223-A 2.8270 eV 438.57 nm f=0.0000 <S\*\*2>=0.986  
103A ->105A 0.15707  
104A ->106A 0.14857  
99B ->104B 0.93087  
103B ->105B -0.18626

Excited State 7: 2.019-A 3.1024 eV 399.64 nm f=0.0083 <S\*\*2>=0.770  
98B ->104B 0.99166

Excited State 8: 2.983-A 3.1174 eV 397.71 nm f=0.0260 <S\*\*2>=1.975  
101A ->105A -0.12355  
102A ->110A 0.10208  
103A ->105A -0.42220  
104A ->106A -0.52065  
99B ->104B 0.32132  
99B ->108B -0.11048  
101B ->105B 0.15754  
103B ->105B 0.55240

Excited State 9: 3.261-A 3.5415 eV 350.09 nm f=0.0006 <S\*\*2>=2.408  
102A ->105A 0.67671  
103A ->106A -0.22624  
104A ->107A 0.12258  
97B ->104B -0.34335  
101B ->108B -0.12023  
102B ->105B -0.49253  
103B ->108B 0.16701

Excited State 10: 2.623-A 3.5941 eV 344.96 nm f=0.0014 <S\*\*2>=1.470  
101A ->105A 0.16802  
102A ->106A 0.23539

103A ->105A -0.42805  
104A ->106A 0.45448  
96B ->104B 0.62476  
101B ->105B -0.17060  
102B ->108B -0.17354  
103B ->105B 0.21234

Excited State 11: 2.958-A 3.6319 eV 341.37 nm f=0.0093 <S\*\*2>=1.938

99A ->105A 0.20425  
101A ->106A -0.18727  
102A ->105A -0.29142  
102A ->107A -0.10700  
102A ->112A 0.14971  
103A ->106A -0.14852  
103A ->110A -0.20667  
104A ->105A 0.10290  
104A ->107A 0.51596  
104A ->114A -0.11608  
97B ->104B -0.35328  
99B ->105B -0.19520  
101B ->108B 0.12218  
101B ->109B -0.13595  
102B ->105B 0.25574  
102B ->106B 0.12059  
102B ->112B -0.17570  
103B ->108B 0.18053  
103B ->109B 0.17338

Excited State 12: 2.035-A 3.6730 eV 337.55 nm f=0.0000 <S\*\*2>=0.786

104A ->108A 0.74403  
104A ->109A -0.64132

Excited State 13: 2.142-A 3.7261 eV 332.75 nm f=0.0031 <S\*\*2>=0.897

104A ->107A 0.62149  
97B ->104B 0.72904  
102B ->105B -0.19530

Excited State 14: 3.461-A 3.7662 eV 329.20 nm f=0.0001 <S\*\*2>=2.745

98A ->107A -0.40470  
98A ->112A -0.16322  
100A ->108A -0.48480  
100A ->109A -0.17895  
103A ->107A 0.13312  
98B ->106B -0.40636  
98B ->112B -0.15802  
100B ->107B 0.49598  
100B ->110B 0.14290  
103B ->106B -0.12787

Excited State 15: 2.772-A 3.8328 eV 323.48 nm f=0.0000 <S\*\*2>=1.671

99A ->105A -0.17410  
101A ->110A -0.15102  
102A ->107A 0.15591  
102A ->112A -0.20601  
103A ->106A 0.20892  
103A ->110A 0.19055  
104A ->107A 0.56321  
97B ->104B -0.42122  
99B ->105B 0.17638  
101B ->109B 0.16271  
102B ->106B -0.15309  
102B ->112B 0.18821  
103B ->108B -0.22231  
103B ->109B -0.17431

Excited State 16: 2.757-A 3.8479 eV 322.22 nm f=0.0243 <S\*\*2>=1.651

99A ->106A 0.14239  
101A ->105A -0.27245  
102A ->106A -0.16466  
102A ->110A 0.21100  
103A ->105A -0.17338  
103A ->107A 0.13549

|                           |                                           |
|---------------------------|-------------------------------------------|
| 103A ->112A               | -0.16908                                  |
| 104A ->106A               | 0.57196                                   |
| 104A ->110A               | -0.23005                                  |
| 96B ->104B                | -0.36428                                  |
| 99B ->108B                | -0.12265                                  |
| 101B ->112B               | -0.13095                                  |
| 102B ->109B               | -0.23800                                  |
| 103B ->106B               | -0.14331                                  |
| 103B ->112B               | 0.14308                                   |
| Excited State 17: 2.030-A | 3.9360 eV 315.00 nm f=0.0000 <S**2>=0.781 |
| 104A ->108A               | 0.66127                                   |
| 104A ->109A               | 0.73079                                   |
| 104A ->115A               | -0.11154                                  |
| Excited State 18: 2.776-A | 3.9386 eV 314.79 nm f=0.0009 <S**2>=1.676 |
| 101A ->105A               | -0.21278                                  |
| 102A ->106A               | -0.13299                                  |
| 102A ->110A               | 0.14437                                   |
| 103A ->105A               | 0.43402                                   |
| 103A ->107A               | 0.12337                                   |
| 103A ->112A               | -0.13766                                  |
| 104A ->106A               | -0.13929                                  |
| 104A ->110A               | -0.22864                                  |
| 96B ->104B                | 0.63838                                   |
| 101B ->105B               | 0.27721                                   |
| 101B ->112B               | -0.10225                                  |
| 102B ->108B               | 0.14340                                   |
| 102B ->109B               | -0.17444                                  |
| Excited State 19: 3.179-A | 3.9642 eV 312.76 nm f=0.0067 <S**2>=2.276 |
| 101A ->105A               | 0.42806                                   |
| 102A ->106A               | 0.21222                                   |
| 102A ->110A               | 0.17920                                   |
| 103A ->107A               | 0.17491                                   |
| 103A ->112A               | -0.17024                                  |

|                           |                                           |
|---------------------------|-------------------------------------------|
| 104A ->106A               | -0.28583                                  |
| 104A ->110A               | -0.34979                                  |
| 92B ->104B                | 0.11232                                   |
| 99B ->109B                | -0.11651                                  |
| 101B ->105B               | -0.36834                                  |
| 102B ->108B               | -0.18960                                  |
| 102B ->109B               | -0.14736                                  |
| 103B ->105B               | -0.27270                                  |
| 103B ->106B               | -0.17993                                  |
| 103B ->112B               | 0.16266                                   |
| 103B ->114B               | 0.11265                                   |
| Excited State 20: 2.115-A | 4.1149 eV 301.30 nm f=0.0002 <S**2>=0.868 |
| 103A ->109A               | 0.12028                                   |
| 104A ->111A               | 0.96844                                   |
| Excited State 21: 2.040-A | 4.1169 eV 301.16 nm f=0.4119 <S**2>=0.790 |
| 102A ->105A               | 0.59581                                   |
| 104A ->112A               | 0.14140                                   |
| 102B ->105B               | 0.75141                                   |
| Excited State 22: 2.168-A | 4.1272 eV 300.41 nm f=0.1105 <S**2>=0.925 |
| 101A ->112A               | -0.10542                                  |
| 102A ->110A               | -0.13451                                  |
| 103A ->105A               | 0.52978                                   |
| 104A ->106A               | 0.11219                                   |
| 104A ->110A               | -0.35134                                  |
| 96B ->104B                | -0.15107                                  |
| 101B ->105B               | -0.24221                                  |
| 102B ->108B               | -0.12607                                  |
| 103B ->105B               | 0.63957                                   |
| Excited State 23: 2.520-A | 4.2469 eV 291.94 nm f=0.0196 <S**2>=1.338 |
| 101A ->105A               | 0.19814                                   |
| 101A ->107A               | -0.11900                                  |
| 101A ->112A               | 0.14044                                   |
| 102A ->106A               | 0.11297                                   |

|             |          |
|-------------|----------|
| 102A ->110A | 0.22385  |
| 103A ->105A | 0.25428  |
| 104A ->110A | 0.73710  |
| 101B ->105B | -0.13444 |
| 101B ->106B | 0.14568  |
| 101B ->112B | -0.17963 |
| 102B ->109B | -0.29005 |
| 103B ->105B | 0.20348  |

Excited State 24: 2.807-A 4.3073 eV 287.85 nm f=0.0330 <S\*\*2>=1.720

|             |          |
|-------------|----------|
| 99A ->105A  | 0.15185  |
| 101A ->106A | -0.13737 |
| 102A ->107A | 0.10013  |
| 102A ->112A | -0.10395 |
| 103A ->106A | -0.31798 |
| 103A ->110A | 0.24216  |
| 104A ->112A | 0.68534  |
| 104A ->114A | -0.13993 |
| 94B ->104B  | -0.13096 |
| 99B ->105B  | -0.13991 |
| 101B ->108B | 0.12925  |
| 102B ->106B | -0.15213 |
| 102B ->112B | 0.11054  |
| 103B ->108B | 0.27869  |
| 103B ->109B | -0.22656 |

Excited State 25: 3.004-A 4.3975 eV 281.94 nm f=0.0065 <S\*\*2>=2.006

|             |          |
|-------------|----------|
| 99A ->105A  | -0.19366 |
| 101A ->110A | 0.23617  |
| 102A ->107A | -0.27932 |
| 102A ->112A | 0.22509  |
| 103A ->106A | 0.22872  |
| 104A ->112A | 0.57742  |
| 104A ->114A | 0.11261  |
| 99B ->105B  | 0.19352  |



101B ->109B -0.25978  
102B ->106B 0.30690  
102B ->112B -0.24541  
103B ->108B -0.23828

Excited State 26: 3.444-A 4.5255 eV 273.97 nm f=0.0000 <S\*\*2>=2.716

98A ->108A 0.18353  
100A ->105A 0.38041  
100A ->107A 0.56886  
100A ->112A 0.18700  
98B ->107B 0.19819  
100B ->105B -0.19779  
100B ->106B -0.56243  
100B ->112B -0.17579  
103B ->107B 0.11469

Excited State 27: 3.365-A 4.5806 eV 270.67 nm f=0.0006 <S\*\*2>=2.580

98A ->105A 0.11036  
98A ->107A 0.33314  
98A ->112A 0.12221  
100A ->108A -0.36998  
100A ->109A -0.12909  
102A ->106A -0.12832  
102A ->110A 0.13148  
103A ->107A -0.16186  
98B ->106B 0.33183  
98B ->112B 0.11462  
100B ->107B 0.36990  
100B ->110B 0.10071  
101B ->105B -0.13220  
102B ->109B -0.12542  
103B ->106B 0.51699

Excited State 28: 3.055-A 4.6363 eV 267.42 nm f=0.0000 <S\*\*2>=2.083

102A ->108A 0.27163

102A ->109A -0.35847  
103A ->111A 0.35185  
104A ->109A 0.12969  
104A ->115A 0.50289  
104A ->118A -0.25289  
102B ->107B -0.27258  
102B ->110B 0.34528  
103B ->111B -0.26164

Excited State 29: 3.283-A 4.6605 eV 266.03 nm f=0.0010 <S\*\*2>=2.444

97A ->105A 0.15599  
98A ->105A 0.18246  
98A ->107A 0.21094  
99A ->106A 0.16425  
100A ->108A -0.18346  
101A ->105A -0.30520  
101A ->112A -0.11289  
102A ->106A 0.43449  
102A ->110A -0.15919  
103A ->114A -0.17474  
104A ->110A 0.13916  
97B ->105B -0.13558  
98B ->105B 0.14710  
98B ->106B 0.20907  
99B ->108B -0.15119  
100B ->107B 0.18098  
101B ->105B 0.11216  
101B ->106B -0.12113  
101B ->112B 0.12825  
102B ->108B -0.18160  
102B ->109B 0.17410  
103B ->106B -0.32906  
103B ->114B 0.17400

Excited State 30: 2.438-A 4.6729 eV 265.33 nm f=0.0121 <S\*\*2>=1.236

|                                                                     |          |
|---------------------------------------------------------------------|----------|
| 98A ->107A                                                          | 0.14830  |
| 100A ->108A                                                         | -0.10307 |
| 101A ->105A                                                         | 0.55365  |
| 103A ->107A                                                         | -0.26168 |
| 98B ->106B                                                          | 0.16497  |
| 100B ->107B                                                         | 0.14144  |
| 101B ->105B                                                         | 0.38925  |
| 102B ->108B                                                         | 0.28395  |
| 103B ->106B                                                         | -0.42946 |
| 103B ->112B                                                         | 0.13915  |
| 103B ->114B                                                         | -0.14355 |
| Excited State 31: 3.056-A 4.7053 eV 263.50 nm f=0.0001 <S**2>=2.085 |          |
| 98A ->108A                                                          | -0.10562 |
| 100A ->105A                                                         | 0.63078  |
| 102A ->111A                                                         | 0.13516  |
| 103A ->108A                                                         | 0.19272  |
| 102B ->111B                                                         | -0.23089 |
| 103B ->107B                                                         | -0.58842 |
| 103B ->110B                                                         | 0.24517  |
| Excited State 32: 2.975-A 4.7218 eV 262.58 nm f=0.0003 <S**2>=1.962 |          |
| 100A ->105A                                                         | 0.66884  |
| 100A ->107A                                                         | -0.21961 |
| 102A ->111A                                                         | -0.13863 |
| 103A ->109A                                                         | 0.11880  |
| 100B ->106B                                                         | 0.24238  |
| 102B ->111B                                                         | 0.23695  |
| 103B ->107B                                                         | 0.46479  |
| 103B ->110B                                                         | -0.26613 |
| Excited State 33: 3.025-A 4.7363 eV 261.78 nm f=0.0029 <S**2>=2.037 |          |
| 96A ->105A                                                          | 0.14750  |
| 101A ->106A                                                         | -0.41895 |
| 102A ->105A                                                         | 0.22371  |
| 102A ->107A                                                         | 0.14879  |

102A ->114A -0.20158  
103A ->106A 0.47087  
104A ->112A -0.16926  
104A ->114A -0.15129  
94B ->104B -0.42592  
96B ->105B -0.10060  
101B ->108B 0.27645  
101B ->109B -0.11346  
102B ->105B -0.14205  
102B ->114B 0.14721  
103B ->109B -0.19098

Excited State 34: 3.372-A 4.7567 eV 260.65 nm f=0.0190 <S\*\*2>=2.593

97A ->105A -0.19045  
98A ->105A -0.15345  
99A ->106A -0.27828  
101A ->105A -0.22191  
101A ->107A -0.15457  
101A ->114A 0.14906  
102A ->106A 0.40348  
102A ->110A 0.20065  
103A ->114A 0.15540  
104A ->123A 0.11271  
92B ->104B -0.11155  
97B ->105B 0.21886  
98B ->105B -0.15169  
99B ->108B 0.29171  
101B ->105B 0.18169  
101B ->106B 0.13651  
101B ->114B -0.14141  
102B ->108B -0.31077  
102B ->109B -0.15090  
103B ->105B -0.14717  
103B ->114B -0.22587

Excited State 35: 2.654-A 4.7916 eV 258.75 nm f=0.1334 <S\*\*2>=1.511

99A ->105A -0.25474  
102A ->107A 0.17596  
103A ->110A 0.11320  
104A ->105A 0.11373  
104A ->112A -0.11721  
104A ->114A 0.49545  
102B ->105B 0.13378  
102B ->106B 0.42325  
103B ->108B 0.54067  
103B ->109B -0.21544

Excited State 36: 2.663-A 4.8069 eV 257.93 nm f=0.0005 <S\*\*2>=1.523

97A ->105A 0.12070  
98A ->107A -0.13223  
99A ->106A 0.13004  
101A ->105A 0.25992  
102A ->106A 0.34664  
103A ->112A 0.10587  
103A ->114A -0.15368  
104A ->123A -0.10865  
92B ->104B -0.16469  
96B ->104B -0.10086  
97B ->105B -0.11206  
98B ->106B -0.14393  
99B ->108B -0.10951  
101B ->105B 0.50986  
103B ->106B 0.53433  
103B ->112B 0.12746

Excited State 37: 2.387-A 4.8185 eV 257.31 nm f=0.0000 <S\*\*2>=1.175

103A ->111A 0.13279  
104A ->115A 0.44571  
104A ->118A -0.19786  
95B ->104B -0.39892

|                   |          |           |           |          |              |
|-------------------|----------|-----------|-----------|----------|--------------|
| 101B ->111B       | -0.12365 |           |           |          |              |
| 102B ->107B       | 0.53062  |           |           |          |              |
| 102B ->110B       | -0.42304 |           |           |          |              |
| 103B ->111B       | 0.24907  |           |           |          |              |
| Excited State 38: | 2.084-A  | 4.8303 eV | 256.68 nm | f=0.0000 | <S**2>=0.835 |
| 104A ->115A       | 0.20115  |           |           |          |              |
| 95B ->104B        | 0.90888  |           |           |          |              |
| 102B ->107B       | 0.23282  |           |           |          |              |
| 102B ->110B       | -0.18166 |           |           |          |              |
| 103B ->111B       | 0.10603  |           |           |          |              |
| Excited State 39: | 2.518-A  | 4.8530 eV | 255.48 nm | f=0.0223 | <S**2>=1.335 |
| 101A ->106A       | -0.21295 |           |           |          |              |
| 102A ->107A       | -0.11391 |           |           |          |              |
| 103A ->106A       | -0.15669 |           |           |          |              |
| 104A ->114A       | 0.61535  |           |           |          |              |
| 99B ->105B        | 0.15529  |           |           |          |              |
| 101B ->108B       | 0.19514  |           |           |          |              |
| 102B ->106B       | -0.58976 |           |           |          |              |
| 102B ->112B       | -0.11036 |           |           |          |              |
| 102B ->114B       | 0.11104  |           |           |          |              |
| 103B ->109B       | 0.15319  |           |           |          |              |
| Excited State 40: | 2.672-A  | 4.8549 eV | 255.38 nm | f=0.0003 | <S**2>=1.535 |
| 102A ->111A       | 0.32236  |           |           |          |              |
| 103A ->108A       | 0.35018  |           |           |          |              |
| 103A ->109A       | -0.28985 |           |           |          |              |
| 104A ->113A       | -0.40700 |           |           |          |              |
| 104A ->116A       | -0.19025 |           |           |          |              |
| 100B ->105B       | 0.13323  |           |           |          |              |
| 102B ->111B       | -0.22903 |           |           |          |              |
| 103B ->107B       | 0.53715  |           |           |          |              |
| 103B ->110B       | 0.24076  |           |           |          |              |
| Excited State 41: | 2.880-A  | 4.8631 eV | 254.95 nm | f=0.0019 | <S**2>=1.824 |
| 99A ->105A        | 0.47208  |           |           |          |              |

101A ->110A -0.13058  
102A ->107A 0.35048  
103A ->106A 0.47485  
103A ->110A -0.12363  
104A ->112A 0.24557  
104A ->114A 0.30708  
94B ->104B 0.21195  
99B ->105B -0.29892  
103B ->109B 0.18755

Excited State 42: 2.111-A 4.8763 eV 254.26 nm f=0.0008 <S\*\*2>=0.864

102A ->111A 0.10678  
103A ->108A 0.21118  
104A ->113A 0.82987  
104A ->116A -0.12996  
104A ->117A 0.34259  
104A ->122A 0.10814  
102B ->111B -0.10696  
103B ->107B 0.21364

Excited State 43: 2.783-A 4.8901 eV 253.54 nm f=0.0005 <S\*\*2>=1.687

98A ->107A 0.15947  
101A ->105A 0.13867  
101A ->107A 0.10127  
101A ->112A -0.11980  
102A ->106A -0.20855  
102A ->110A -0.12889  
103A ->107A 0.80795  
104A ->110A 0.14805  
98B ->106B 0.14084  
101B ->105B 0.12772  
102B ->108B -0.10234  
102B ->109B 0.12607  
103B ->112B 0.15925

Excited State 44: 2.267-A 4.9175 eV 252.13 nm f=0.0423 <S\*\*2>=1.034

|                                                                     |          |
|---------------------------------------------------------------------|----------|
| 99A ->105A                                                          | -0.22303 |
| 103A ->106A                                                         | 0.26005  |
| 104A ->114A                                                         | -0.28171 |
| 94B ->104B                                                          | 0.68038  |
| 101B ->109B                                                         | -0.12939 |
| 102B ->106B                                                         | -0.36949 |
| 102B ->112B                                                         | -0.13557 |
| 103B ->108B                                                         | 0.26745  |
| 103B ->109B                                                         | -0.19475 |
| Excited State 45: 2.783-A 4.9209 eV 251.95 nm f=0.0001 <S**2>=1.687 |          |
| 98A ->108A                                                          | -0.20115 |
| 103A ->108A                                                         | 0.60308  |
| 104A ->116A                                                         | 0.15701  |
| 104A ->117A                                                         | -0.13258 |
| 98B ->107B                                                          | -0.24466 |
| 100B ->105B                                                         | -0.56434 |
| 102B ->111B                                                         | 0.17387  |
| 103B ->110B                                                         | -0.31411 |
| Excited State 46: 2.199-A 4.9291 eV 251.54 nm f=0.0011 <S**2>=0.959 |          |
| 104A ->113A                                                         | 0.22164  |
| 104A ->116A                                                         | 0.65208  |
| 104A ->117A                                                         | -0.41648 |
| 88B ->104B                                                          | -0.14615 |
| 90B ->104B                                                          | 0.17115  |
| 93B ->104B                                                          | -0.34276 |
| 100B ->105B                                                         | 0.21109  |
| 102B ->111B                                                         | -0.17504 |
| 103B ->110B                                                         | 0.11387  |
| Excited State 47: 3.139-A 4.9410 eV 250.93 nm f=0.0002 <S**2>=2.213 |          |
| 99A ->105A                                                          | 0.51500  |
| 99A ->107A                                                          | 0.12354  |
| 99A ->112A                                                          | -0.12362 |
| 101A ->110A                                                         | 0.11941  |



102A ->107A -0.47120  
103A ->110A 0.25333  
104A ->112A -0.17597  
104A ->114A 0.15536  
94B ->104B 0.18534  
99B ->105B -0.12567  
99B ->106B -0.12204  
99B ->112B 0.11532  
102B ->106B 0.11955  
103B ->108B -0.15857  
103B ->109B -0.45064

Excited State 48: 2.158-A 4.9417 eV 250.89 nm f=0.1140 <S\*\*2>=0.914

102A ->106A -0.11647  
104A ->106A 0.12515  
104A ->119A 0.10926  
104A ->123A 0.13855  
89B ->104B -0.27374  
92B ->104B 0.73590  
101B ->105B 0.31008  
101B ->106B 0.10621  
102B ->108B -0.35273  
102B ->109B -0.12993

Excited State 49: 2.994-A 4.9495 eV 250.50 nm f=0.0003 <S\*\*2>=1.991

98A ->108A -0.13286  
100A ->107A 0.22591  
103A ->108A 0.36964  
104A ->116A -0.10365  
100B ->105B 0.72157  
100B ->106B -0.18200  
102B ->111B 0.23934  
103B ->107B -0.14474  
103B ->110B -0.32579

Excited State 50: 2.339-A 4.9513 eV 250.41 nm f=0.0000 <S\*\*2>=1.118

101A ->111A -0.16307  
102A ->108A 0.68737  
102A ->109A -0.39953  
103A ->111A 0.11108  
104A ->115A -0.44586  
104A ->118A 0.17605  
102B ->107B 0.25717

SavETr: write IOETrn= 770 NScale= 10 NData= 16 NLR=1 LETran= 910.

Leave Link 914 at Sat Sep 15 18:43:44 2018, MaxMem= 1610612736 cpu: 150344.1

(Enter /software/gaussian/g09/ivybridge\_xe2015/g09/l601.exe)

Copying SCF densities to generalized density rwf, IOpCl= 1 IROHF=0.

## 6.6 Computed zyx-coordinates of the $D_0$ state of compound $6^{**}$ and excitation energies (uB3LYP/6-311++G\*\*, IEFPCM $CH_2Cl_2$ )

Charge = 1 Multiplicity = 2

C -0.32961 -2.23046 0.01609  
C -0.94834 -0.98232 -0.00713  
N -0.20278 0.19598 -0.01416  
C 1.171 0.17544 -0.01442  
C 1.98438 -0.94781 0.00015  
S 1.37131 -2.57454 0.03003  
S -1.43742 -3.56781 0.03038  
C -2.79593 -2.45689 0.00088  
C -2.40012 -1.09749 -0.02134  
S 2.08991 1.66961 -0.02952  
C 3.60053 0.75919 -0.01719  
C 3.38624 -0.63671 -0.00155  
C -0.83291 1.50539 0.00122  
C -1.08546 2.15374 -1.20632  
C -1.66566 3.41826 -1.19135  
C -1.96958 3.99094 0.03525  
C -1.71675 3.36146 1.24575

|   |          |          |          |
|---|----------|----------|----------|
| C | -1.13584 | 2.09759  | 1.22606  |
| F | -2.53532 | 5.21778  | 0.05188  |
| C | -4.1308  | -2.8551  | -0.00603 |
| C | -5.10976 | -1.87226 | -0.03899 |
| C | -4.75104 | -0.51781 | -0.06594 |
| C | -3.42213 | -0.12491 | -0.05747 |
| C | 4.88145  | 1.30394  | -0.02225 |
| C | 5.96355  | 0.42934  | -0.01064 |
| C | 5.77035  | -0.96139 | 0.00555  |
| C | 4.49439  | -1.50195 | 0.01018  |
| H | -0.83936 | 1.67665  | -2.14669 |
| H | -1.87996 | 3.95039  | -2.10892 |
| H | -1.96918 | 3.85101  | 2.17723  |
| H | -0.92684 | 1.57684  | 2.15225  |
| H | -4.39514 | -3.90491 | 0.01267  |
| H | -6.15493 | -2.15668 | -0.04503 |
| H | -5.52372 | 0.24059  | -0.09388 |
| H | -3.19387 | 0.92723  | -0.08034 |
| H | 5.03415  | 2.37591  | -0.03455 |
| H | 6.96975  | 0.83052  | -0.01412 |
| H | 6.63018  | -1.61985 | 0.01436  |
| H | 4.35769  | -2.57704 | 0.0221   |

SCF Done: E(UB3LYP) = -2194.86954093 A.U. after 2 cycles

Sum of electronic and zero-point Energies= -2194.592824

Sum of electronic and thermal Energies= -2194.571951

Sum of electronic and thermal Enthalpies= -2194.571007

Sum of electronic and thermal Free Energies= -2194.645049

Excitation energies and oscillator strengths:

Excited State 1: 2.015-A 1.7371 eV 713.74 nm f=0.0858 <S\*\*2>=0.765

102B ->104B -0.17349

103B ->104B 0.97636

This state for optimization and/or second-order correction.

Total Energy, E(TD-HF/TD-KS) = -2194.80570348

Copying the excited state density for this state as the 1-particle RhoCI density.

Excited State 2: 2.031-A 2.0103 eV 616.75 nm f=0.1564 <S\*\*2>=0.781

104A ->105A 0.15310

102B ->104B 0.96261

103B ->104B 0.15530

Excited State 3: 2.029-A 2.1472 eV 577.43 nm f=0.0219 <S\*\*2>=0.779

104A ->105A -0.21402

101B ->104B 0.95712

102B ->104B 0.11781

Excited State 4: 2.111-A 2.4978 eV 496.37 nm f=0.0103 <S\*\*2>=0.864

104A ->105A 0.92893

101B ->104B 0.23625

102B ->104B -0.11396

Excited State 5: 2.014-A 2.7615 eV 448.98 nm f=0.0002 <S\*\*2>=0.764

100B ->104B 0.99649

Excited State 6: 2.083-A 2.9164 eV 425.12 nm f=0.0004 <S\*\*2>=0.835

98B ->104B -0.31076

99B ->104B 0.91565

Excited State 7: 2.455-A 3.1121 eV 398.39 nm f=0.0221 <S\*\*2>=1.257

102A ->105A 0.14903

103A ->105A -0.26116

104A ->108A 0.20334

97B ->104B 0.24981

98B ->104B 0.73158

99B ->104B 0.31230

102B ->105B 0.15595

103B ->105B 0.30245

Excited State 8: 2.827-A 3.1702 eV 391.09 nm f=0.0259 <S\*\*2>=1.748

101A ->105A -0.10352

102A ->105A -0.21448

103A ->105A 0.33526  
104A ->106A -0.14599  
104A ->108A -0.32825  
97B ->104B -0.13336  
98B ->104B 0.56231  
99B ->104B 0.14587  
102B ->105B -0.22436  
103B ->105B -0.44090

Excited State 9: 2.132-A 3.3400 eV 371.21 nm f=0.0018 <S\*\*2>=0.886

102A ->105A -0.11834  
104A ->108A -0.23438  
97B ->104B 0.91208  
98B ->104B -0.12181  
102B ->105B -0.13729

Excited State 10: 3.259-A 3.6091 eV 343.53 nm f=0.0265 <S\*\*2>=2.406

101A ->105A 0.35275  
101A ->108A 0.10699  
102A ->105A 0.15886  
103A ->105A 0.55179  
104A ->106A 0.12488  
104A ->108A 0.23037  
95B ->104B 0.11562  
96B ->104B -0.12837  
97B ->104B 0.19796  
101B ->105B -0.14558  
102B ->105B 0.41501  
103B ->105B -0.29669

Excited State 11: 2.058-A 3.6348 eV 341.11 nm f=0.0003 <S\*\*2>=0.809

104A ->106A 0.21992  
104A ->107A 0.81128  
104A ->108A -0.13213  
104A ->109A -0.46584  
104A ->110A 0.10899

104A ->115A 0.10165

Excited State 12: 3.179-A 3.7195 eV 333.34 nm f=0.0009 <S\*\*2>=2.276

98A ->105A 0.10213

99A ->106A -0.10339

100A ->107A -0.11422

101A ->105A -0.23287

101A ->108A 0.11945

101A ->110A -0.15491

102A ->105A 0.21718

102A ->110A 0.13258

103A ->105A 0.15592

103A ->106A -0.24592

103A ->108A -0.17760

103A ->111A -0.18510

104A ->106A 0.39165

104A ->107A -0.10676

104A ->110A 0.13268

96B ->104B 0.10953

99B ->104B -0.10203

100B ->107B 0.11381

101B ->105B 0.23660

101B ->110B -0.20882

103B ->105B -0.10434

103B ->106B -0.20330

103B ->108B -0.23318

103B ->111B -0.15220

Excited State 13: 3.447-A 3.7807 eV 327.94 nm f=0.0005 <S\*\*2>=2.720

98A ->106A -0.15831

99A ->106A -0.33249

99A ->108A 0.11423

99A ->111A 0.13251

100A ->107A -0.43417

100A ->109A -0.21236

103A ->108A 0.10416  
98B ->106B 0.27531  
98B ->111B -0.10660  
99B ->106B 0.26669  
100B ->107B 0.45191  
100B ->109B 0.18791  
103B ->108B 0.10088

Excited State 14: 2.521-A 3.8121 eV 325.23 nm f=0.0012 <S\*\*2>=1.339

101A ->105A 0.24196  
102A ->105A -0.22644  
103A ->108A 0.13547  
104A ->106A 0.70891  
104A ->107A -0.22891  
104A ->108A -0.26792  
104A ->110A -0.11553  
96B ->104B -0.21111  
101B ->105B -0.24035  
102B ->105B -0.12247  
103B ->108B 0.10900

Excited State 15: 2.963-A 3.8670 eV 320.62 nm f=0.0209 <S\*\*2>=1.945

98A ->105A -0.13226  
101A ->105A -0.40936  
101A ->108A -0.11446  
101A ->110A 0.14901  
102A ->108A -0.16941  
103A ->105A 0.12033  
103A ->111A 0.18684  
104A ->105A 0.10143  
104A ->106A 0.42032  
104A ->108A 0.32075  
96B ->104B 0.22563  
99B ->105B 0.12664  
101B ->105B 0.21976

101B ->110B 0.17127  
102B ->105B -0.11308  
102B ->108B 0.21642  
102B ->111B -0.13015  
103B ->105B -0.10176  
103B ->106B 0.10408  
103B ->111B 0.14535

Excited State 16: 2.760-A 3.9575 eV 313.29 nm f=0.0297 <S\*\*2>=1.654

101A ->110A -0.11274  
102A ->105A -0.41415  
102A ->108A 0.11535  
102A ->110A 0.13339  
103A ->110A 0.13786  
104A ->107A 0.15307  
104A ->108A 0.62280  
104A ->109A 0.13607  
95B ->104B 0.11325  
96B ->104B -0.20696  
101B ->105B -0.14299  
101B ->110B -0.15943  
101B ->111B 0.11086  
102B ->105B -0.19427  
102B ->108B -0.10709  
103B ->110B 0.12728

Excited State 17: 2.064-A 3.9799 eV 311.53 nm f=0.0011 <S\*\*2>=0.815

104A ->107A 0.47182  
104A ->108A -0.17940  
104A ->109A 0.81131  
104A ->110A -0.14845  
104A ->115A -0.11323

Excited State 18: 3.133-A 3.9927 eV 310.53 nm f=0.0095 <S\*\*2>=2.203

97A ->105A 0.15282  
97A ->110A 0.10367



|             |          |
|-------------|----------|
| 101A ->106A | 0.16735  |
| 101A ->111A | 0.21533  |
| 102A ->105A | 0.18028  |
| 102A ->106A | -0.11830 |
| 102A ->110A | 0.10717  |
| 102A ->111A | -0.11839 |
| 103A ->105A | 0.23742  |
| 103A ->110A | 0.31556  |
| 104A ->106A | 0.11954  |
| 104A ->108A | -0.14144 |
| 104A ->110A | -0.15607 |
| 104A ->111A | -0.16213 |
| 96B ->104B  | 0.12934  |
| 97B ->105B  | 0.14520  |
| 97B ->110B  | -0.12647 |
| 101B ->106B | 0.17257  |
| 101B ->108B | 0.13049  |
| 101B ->111B | 0.23000  |
| 102B ->105B | 0.16664  |
| 103B ->105B | 0.36532  |
| 103B ->110B | 0.30270  |
| 103B ->114B | 0.10150  |

Excited State 19: 2.287-A 4.0846 eV 303.54 nm f=0.1016 <S\*\*2>=1.057

|             |          |
|-------------|----------|
| 101A ->105A | -0.13870 |
| 103A ->105A | 0.47694  |
| 103A ->110A | -0.15427 |
| 104A ->106A | -0.16808 |
| 104A ->110A | -0.38490 |
| 104A ->111A | 0.26530  |
| 96B ->104B  | -0.23118 |
| 102B ->105B | -0.27780 |
| 103B ->105B | 0.46746  |
| 103B ->110B | -0.12258 |

Excited State 20: 2.300-A 4.1117 eV 301.54 nm f=0.0445 <S\*\*2>=1.072

101A ->105A 0.14175

102A ->105A -0.28159

102A ->111A 0.11606

103A ->105A 0.33457

104A ->109A 0.12732

104A ->110A 0.63984

96B ->104B 0.35946

102B ->105B -0.18216

103B ->105B 0.32671

Excited State 21: 2.304-A 4.1662 eV 297.60 nm f=0.0086 <S\*\*2>=1.077

102A ->105A -0.11527

104A ->110A -0.42400

104A ->111A 0.15946

96B ->104B 0.75771

101B ->105B -0.29151

102B ->111B 0.10467

Excited State 22: 2.435-A 4.2892 eV 289.06 nm f=0.0120 <S\*\*2>=1.232

101A ->105A 0.20903

101A ->111A 0.13555

102A ->105A 0.18932

102A ->108A -0.12193

102A ->110A 0.16680

103A ->105A -0.12855

104A ->111A 0.78120

95B ->104B 0.13424

101B ->111B 0.13817

102B ->108B 0.13823

102B ->110B -0.18770

103B ->105B -0.10142

Excited State 23: 2.113-A 4.3407 eV 285.63 nm f=0.4406 <S\*\*2>=0.866

101A ->105A -0.31360

102A ->105A -0.46212

104A ->111A 0.27173  
95B ->104B -0.38217  
96B ->104B -0.12242  
101B ->105B 0.10492  
102B ->105B 0.61804

Excited State 24: 2.567-A 4.4131 eV 280.94 nm f=0.0003 <S\*\*2>=1.397

103A ->107A -0.28274  
103A ->109A 0.23972  
104A ->109A -0.11602  
104A ->112A 0.78020  
104A ->115A -0.17863  
104A ->116A 0.13416  
103B ->107B -0.25178  
103B ->109B 0.18535

Excited State 25: 3.088-A 4.4336 eV 279.64 nm f=0.0108 <S\*\*2>=2.134

98A ->105A -0.21374  
99A ->105A 0.14821  
101A ->105A 0.11333  
101A ->106A -0.10104  
101A ->110A -0.20512  
102A ->105A -0.17994  
102A ->106A -0.12061  
102A ->108A -0.23920  
103A ->106A -0.15819  
103A ->108A 0.17198  
103A ->111A -0.18947  
104A ->110A -0.11183  
104A ->111A -0.18606  
104A ->113A 0.14294  
104A ->114A 0.25146  
95B ->104B 0.17585  
98B ->105B -0.14153

99B ->105B 0.19685  
101B ->105B 0.25778  
101B ->110B -0.20239  
102B ->106B 0.21876  
102B ->108B 0.25014  
102B ->111B 0.16008  
103B ->106B -0.15736  
103B ->108B 0.15296  
103B ->111B -0.16639

Excited State 26: 2.369-A 4.4528 eV 278.44 nm f=0.0031 <S\*\*2>=1.153

101A ->105A 0.47249  
102A ->105A -0.26925  
103A ->108A -0.11667  
104A ->110A -0.15115  
99B ->105B -0.10073  
101B ->105B 0.64530  
103B ->106B 0.14629  
103B ->108B -0.25309  
103B ->111B 0.17733

Excited State 27: 3.166-A 4.5560 eV 272.13 nm f=0.0001 <S\*\*2>=2.256

99A ->107A 0.16158  
100A ->105A -0.14235  
100A ->106A 0.32345  
100A ->107A -0.11151  
100A ->108A -0.10436  
100A ->111A -0.11088  
103A ->107A 0.17025  
104A ->112A 0.31451  
104A ->115A -0.16295  
98B ->107B -0.12028  
99B ->107B -0.13834  
100B ->106B -0.32512  
101B ->112B 0.10267

|                           |                                           |
|---------------------------|-------------------------------------------|
| 103B ->106B               | 0.15593                                   |
| 103B ->107B               | 0.56229                                   |
| 103B ->109B               | -0.21432                                  |
| Excited State 28: 2.351-A | 4.5759 eV 270.95 nm f=0.2616 <S**2>=1.132 |
| 101A ->105A               | -0.13921                                  |
| 102A ->105A               | -0.22499                                  |
| 104A ->108A               | -0.21277                                  |
| 95B ->104B                | 0.72712                                   |
| 97B ->105B                | -0.16545                                  |
| 102B ->105B               | 0.25426                                   |
| 103B ->105B               | 0.19752                                   |
| Excited State 29: 3.326-A | 4.5958 eV 269.78 nm f=0.0011 <S**2>=2.515 |
| 99A ->106A                | 0.19101                                   |
| 99A ->107A                | -0.16552                                  |
| 100A ->105A               | 0.21515                                   |
| 100A ->106A               | -0.40157                                  |
| 100A ->107A               | -0.13869                                  |
| 100A ->108A               | 0.13318                                   |
| 100A ->109A               | -0.10010                                  |
| 100A ->111A               | 0.11929                                   |
| 104A ->112A               | 0.14241                                   |
| 104A ->115A               | -0.11257                                  |
| 98B ->106B                | -0.12296                                  |
| 98B ->107B                | 0.12865                                   |
| 99B ->106B                | -0.17890                                  |
| 99B ->107B                | 0.11975                                   |
| 100B ->105B               | 0.10746                                   |
| 100B ->106B               | 0.41758                                   |
| 100B ->107B               | 0.16848                                   |
| 100B ->111B               | -0.10867                                  |
| 103B ->106B               | 0.25797                                   |
| 103B ->107B               | 0.29909                                   |
| 103B ->109B               | -0.20830                                  |

Excited State 30: 3.347-A 4.6044 eV 269.28 nm f=0.0046 <S\*\*2>=2.550

|             |          |
|-------------|----------|
| 98A ->106A  | 0.10965  |
| 99A ->106A  | 0.30816  |
| 100A ->105A | -0.13762 |
| 100A ->106A | 0.15984  |
| 100A ->107A | -0.36085 |
| 100A ->109A | -0.13532 |
| 103A ->106A | 0.11820  |
| 103A ->111A | -0.10841 |
| 104A ->112A | -0.13045 |
| 98B ->106B  | -0.22524 |
| 99B ->106B  | -0.25439 |
| 100B ->106B | -0.19421 |
| 100B ->107B | 0.36389  |
| 100B ->109B | 0.12639  |
| 103B ->106B | 0.13859  |
| 103B ->107B | -0.35081 |
| 103B ->109B | 0.18615  |

Excited State 31: 2.142-A 4.6687 eV 265.57 nm f=0.0001 <S\*\*2>=0.897

|             |         |
|-------------|---------|
| 104A ->109A | 0.12735 |
| 104A ->112A | 0.28457 |
| 104A ->115A | 0.86745 |
| 104A ->121A | 0.10723 |

Excited State 32: 3.130-A 4.7133 eV 263.05 nm f=0.0067 <S\*\*2>=2.200

|             |          |
|-------------|----------|
| 97A ->105A  | 0.16944  |
| 99A ->106A  | -0.10345 |
| 101A ->105A | -0.16511 |
| 101A ->108A | 0.27119  |
| 101A ->111A | -0.14893 |
| 103A ->108A | 0.27550  |
| 103A ->114A | -0.11039 |
| 104A ->111A | 0.16602  |
| 104A ->114A | -0.12904 |

|             |          |
|-------------|----------|
| 95B ->104B  | 0.22425  |
| 97B ->105B  | 0.12914  |
| 98B ->106B  | 0.13732  |
| 100B ->107B | -0.10681 |
| 101B ->105B | 0.11615  |
| 101B ->108B | 0.13626  |
| 101B ->111B | -0.10691 |
| 102B ->106B | 0.16224  |
| 102B ->108B | -0.16958 |
| 102B ->110B | 0.11197  |
| 102B ->111B | 0.14461  |
| 103B ->106B | 0.50412  |
| 103B ->107B | -0.10670 |
| 103B ->108B | 0.13112  |
| 103B ->114B | 0.12429  |

Excited State 33: 2.452-A 4.7300 eV 262.12 nm f=0.0001 <S\*\*2>=1.253

|             |          |
|-------------|----------|
| 100A ->105A | 0.33448  |
| 101A ->112A | 0.12261  |
| 102A ->107A | 0.13348  |
| 103A ->106A | 0.24431  |
| 103A ->107A | 0.67802  |
| 103A ->109A | -0.26399 |
| 104A ->112A | 0.22758  |
| 103B ->106B | -0.14534 |
| 103B ->107B | -0.34316 |

Excited State 34: 2.862-A 4.7467 eV 261.20 nm f=0.0005 <S\*\*2>=1.798

|             |          |
|-------------|----------|
| 100A ->105A | 0.84853  |
| 100A ->106A | 0.15730  |
| 103A ->107A | -0.23556 |
| 103A ->109A | 0.13355  |
| 104A ->112A | -0.10498 |
| 100B ->106B | -0.15018 |
| 103B ->106B | -0.10735 |

103B ->107B 0.15863

Excited State 35: 3.030-A 4.7564 eV 260.67 nm f=0.0044 <S\*\*2>=2.045

97A ->105A -0.22164

100A ->105A 0.24236

101A ->108A -0.27321

102A ->105A 0.12339

102A ->108A 0.16772

102A ->110A 0.20443

103A ->106A -0.16856

103A ->108A 0.18694

103A ->114A 0.15083

104A ->110A 0.11066

104A ->111A -0.14735

104A ->114A -0.12477

95B ->104B -0.15659

97B ->105B -0.20721

101B ->108B -0.19238

102B ->106B 0.13501

102B ->110B -0.23482

102B ->111B 0.10129

103B ->106B 0.42154

103B ->114B -0.14706

Excited State 36: 3.057-A 4.7909 eV 258.79 nm f=0.0010 <S\*\*2>=2.086

101A ->105A -0.18786

102A ->108A 0.18890

103A ->106A 0.36870

103A ->107A -0.10933

103A ->108A 0.48765

104A ->113A 0.10332

104A ->114A 0.20609

101B ->105B 0.25054

101B ->114B 0.10240

102B ->108B -0.23039



|                           |                                           |
|---------------------------|-------------------------------------------|
| 103B ->106B               | -0.34180                                  |
| 103B ->107B               | 0.14303                                   |
| 103B ->108B               | 0.23808                                   |
| Excited State 37: 2.426-A | 4.8295 eV 256.72 nm f=0.0043 <S**2>=1.222 |
| 98A ->105A                | 0.14110                                   |
| 99A ->105A                | -0.14377                                  |
| 101A ->105A               | -0.12420                                  |
| 102A ->108A               | 0.10854                                   |
| 104A ->113A               | 0.38354                                   |
| 104A ->114A               | 0.58977                                   |
| 92B ->104B                | 0.13231                                   |
| 95B ->104B                | -0.13773                                  |
| 101B ->105B               | -0.17035                                  |
| 102B ->110B               | 0.12039                                   |
| 103B ->106B               | 0.27594                                   |
| 103B ->108B               | -0.30551                                  |
| 103B ->110B               | 0.13067                                   |
| Excited State 38: 2.033-A | 4.8454 eV 255.88 nm f=0.0001 <S**2>=0.783 |
| 88B ->104B                | -0.13979                                  |
| 91B ->104B                | 0.23056                                   |
| 93B ->104B                | 0.25146                                   |
| 94B ->104B                | 0.91003                                   |
| Excited State 39: 2.932-A | 4.8605 eV 255.08 nm f=0.0005 <S**2>=1.899 |
| 99A ->107A                | -0.12642                                  |
| 100A ->106A               | 0.10784                                   |
| 101A ->107A               | 0.18046                                   |
| 101A ->109A               | -0.13240                                  |
| 103A ->107A               | -0.13905                                  |
| 103A ->109A               | -0.16803                                  |
| 103A ->112A               | 0.19930                                   |
| 104A ->112A               | 0.11395                                   |
| 104A ->113A               | 0.48491                                   |
| 104A ->114A               | -0.29846                                  |

104A ->115A -0.12256  
98B ->107B 0.10737  
99B ->107B 0.11250  
100B ->105B -0.12380  
100B ->106B -0.12311  
101B ->107B 0.21544  
101B ->109B -0.17713  
103B ->107B -0.16636  
103B ->109B -0.35214  
103B ->112B 0.22826

Excited State 40: 2.860-A 4.8900 eV 253.54 nm f=0.0101 <S\*\*2>=1.796

99A ->105A 0.13599  
102A ->106A -0.15248  
102A ->111A -0.10868  
103A ->106A 0.44701  
103A ->107A -0.15504  
103A ->108A -0.14464  
104A ->110A 0.16571  
104A ->113A -0.13545  
99B ->110B -0.11461  
101B ->105B -0.14539  
102B ->106B 0.51355  
102B ->111B 0.21437  
103B ->106B -0.16336  
103B ->108B -0.34617  
103B ->111B 0.22831

Excited State 41: 2.536-A 4.8952 eV 253.28 nm f=0.0014 <S\*\*2>=1.358

99A ->107A 0.10270  
104A ->113A 0.60845  
104A ->114A -0.39352  
104A ->117A -0.10165  
104A ->118A 0.11699  
99B ->107B -0.10013

101B ->107B -0.12688  
101B ->109B 0.11129  
102B ->106B 0.12889  
102B ->107B 0.15362  
102B ->109B -0.13282  
103B ->107B 0.19796  
103B ->109B 0.38334  
103B ->112B -0.13052

Excited State 42: 2.782-A 4.9121 eV 252.41 nm f=0.0009 <S\*\*2>=1.684

101A ->107A -0.13728  
101A ->109A 0.12980  
102A ->107A 0.10719  
103A ->107A -0.20439  
103A ->112A -0.16069  
104A ->116A -0.10117  
88B ->104B -0.24117  
91B ->104B 0.46044  
93B ->104B 0.27512  
94B ->104B -0.30270  
101B ->107B -0.26387  
101B ->109B 0.20428  
102B ->112B 0.10177  
103B ->107B -0.17663  
103B ->109B -0.27278  
103B ->112B -0.24765

Excited State 43: 2.688-A 4.9254 eV 251.72 nm f=0.0007 <S\*\*2>=1.556

101A ->107A 0.15167  
101A ->109A -0.12861  
102A ->107A -0.13511  
103A ->107A 0.17888  
103A ->112A 0.19370  
104A ->113A -0.11887  
104A ->116A -0.10571

|             |          |
|-------------|----------|
| 88B ->104B  | -0.25560 |
| 91B ->104B  | 0.48038  |
| 93B ->104B  | 0.32736  |
| 94B ->104B  | -0.21832 |
| 101B ->107B | 0.23276  |
| 101B ->109B | -0.15149 |
| 102B ->107B | 0.26599  |
| 103B ->107B | 0.16009  |
| 103B ->109B | 0.20552  |
| 103B ->112B | 0.20629  |

Excited State 44: 2.806-A 4.9531 eV 250.32 nm f=0.0003 <S\*\*2>=1.719

|             |          |
|-------------|----------|
| 99A ->107A  | -0.13768 |
| 92B ->104B  | 0.10912  |
| 93B ->104B  | -0.40873 |
| 98B ->107B  | 0.13498  |
| 99B ->107B  | 0.13583  |
| 100B ->105B | -0.45180 |
| 102B ->107B | 0.56063  |
| 102B ->109B | -0.18056 |
| 103B ->108B | 0.10809  |

Excited State 45: 2.273-A 4.9631 eV 249.81 nm f=0.0004 <S\*\*2>=1.041

|             |          |
|-------------|----------|
| 88B ->104B  | 0.15732  |
| 91B ->104B  | -0.38071 |
| 93B ->104B  | 0.72554  |
| 100B ->105B | -0.43792 |

Excited State 46: 2.811-A 4.9692 eV 249.51 nm f=0.0016 <S\*\*2>=1.726

|             |          |
|-------------|----------|
| 98A ->108A  | 0.15712  |
| 99A ->105A  | -0.16726 |
| 102A ->106A | -0.13572 |
| 102A ->108A | -0.20212 |
| 102A ->111A | -0.11257 |
| 102A ->114A | -0.13024 |
| 103A ->106A | 0.25521  |

|             |          |
|-------------|----------|
| 103A ->107A | -0.12126 |
| 103A ->108A | -0.27746 |
| 104A ->114A | -0.14963 |
| 104A ->122A | -0.18796 |
| 90B ->104B  | 0.13532  |
| 92B ->104B  | 0.35104  |
| 99B ->105B  | -0.11190 |
| 99B ->108B  | 0.10990  |
| 100B ->105B | 0.35449  |
| 102B ->107B | -0.11827 |
| 102B ->114B | -0.15607 |
| 103B ->108B | 0.26962  |
| 103B ->110B | 0.14150  |

Excited State 47: 2.942-A 4.9766 eV 249.13 nm f=0.0048 <S\*\*2>=1.914

|             |          |
|-------------|----------|
| 99A ->107A  | -0.10210 |
| 103A ->106A | -0.30621 |
| 103A ->107A | 0.11028  |
| 103A ->108A | 0.21786  |
| 91B ->104B  | -0.19017 |
| 93B ->104B  | 0.18662  |
| 100B ->105B | 0.50275  |
| 100B ->106B | -0.12087 |
| 102B ->106B | 0.21455  |
| 102B ->107B | 0.34860  |
| 102B ->110B | 0.12098  |
| 103B ->106B | -0.14369 |
| 103B ->109B | -0.20620 |
| 103B ->110B | 0.17389  |
| 103B ->111B | 0.18076  |

Excited State 48: 3.071-A 4.9780 eV 249.06 nm f=0.0121 <S\*\*2>=2.108

|             |          |
|-------------|----------|
| 99A ->106A  | -0.11800 |
| 102A ->110A | 0.15341  |
| 103A ->106A | 0.35212  |

|             |          |
|-------------|----------|
| 103A ->108A | -0.11549 |
| 103A ->111A | -0.12456 |
| 104A ->111A | -0.12924 |
| 104A ->114A | 0.15874  |
| 91B ->104B  | -0.10292 |
| 92B ->104B  | -0.15873 |
| 99B ->106B  | 0.13752  |
| 100B ->105B | 0.36520  |
| 101B ->108B | 0.10020  |
| 102B ->106B | -0.11362 |
| 102B ->107B | 0.37614  |
| 102B ->109B | -0.16837 |
| 102B ->110B | -0.20626 |
| 103B ->106B | 0.15146  |
| 103B ->109B | -0.15853 |
| 103B ->110B | -0.25854 |
| 103B ->111B | -0.24107 |

Excited State 49: 2.928-A 5.0008 eV 247.93 nm f=0.0224 <S\*\*2>=1.893

|             |          |
|-------------|----------|
| 98A ->105A  | -0.13798 |
| 99A ->105A  | 0.38122  |
| 101A ->110A | -0.10525 |
| 102A ->108A | 0.22012  |
| 102A ->110A | -0.11825 |
| 103A ->108A | -0.23131 |
| 104A ->111A | 0.11754  |
| 90B ->104B  | -0.15298 |
| 92B ->104B  | -0.34258 |
| 97B ->105B  | -0.13045 |
| 100B ->105B | 0.11968  |
| 101B ->108B | -0.19847 |
| 102B ->106B | -0.12965 |
| 102B ->108B | -0.30789 |
| 102B ->110B | 0.27187  |

|                                                                     |          |
|---------------------------------------------------------------------|----------|
| 103B ->108B                                                         | 0.17339  |
| 103B ->110B                                                         | 0.31921  |
| Excited State 50: 2.792-A 5.0117 eV 247.39 nm f=0.0258 <S**2>=1.698 |          |
| 98A ->110A                                                          | -0.11292 |
| 99A ->105A                                                          | 0.38396  |
| 102A ->106A                                                         | -0.12992 |
| 102A ->108A                                                         | 0.17244  |
| 102A ->110A                                                         | 0.12059  |
| 102A ->111A                                                         | -0.16516 |
| 103A ->106A                                                         | -0.25346 |
| 103A ->108A                                                         | -0.30523 |
| 103A ->111A                                                         | 0.14088  |
| 104A ->110A                                                         | 0.13616  |
| 104A ->114A                                                         | 0.18671  |
| 90B ->104B                                                          | 0.12325  |
| 92B ->104B                                                          | 0.28944  |
| 97B ->105B                                                          | 0.12468  |
| 98B ->106B                                                          | -0.10117 |
| 102B ->108B                                                         | -0.13150 |
| 102B ->110B                                                         | -0.22139 |
| 103B ->108B                                                         | 0.28351  |
| 103B ->110B                                                         | -0.18320 |
| 103B ->111B                                                         | 0.13392  |

SavETr: write IOETrn= 770 NScale= 10 NData= 16 NLR=1 LETran= 910.

Leave Link 914 at Sat Sep 15 19:37:39 2018, MaxMem= 1610612736 cpu: 172610.9

(Enter /software/gaussian/g09/ivybridge\_xe2015/g09/l601.exe)

Copying SCF densities to generalized density rwf, IOpCI= 1 IROHF=0.

## 6.7 Computed zyx-coordinates of the D<sub>0</sub> state of compound 7<sup>•+</sup> and excitation energies (uB3LYP/6-311++G<sup>\*\*</sup>, IEFPCM CH<sub>2</sub>Cl<sub>2</sub>)

Charge = 1 Multiplicity = 2

C -1.33555 -1.42298 0.00004

|   |          |          |          |
|---|----------|----------|----------|
| C | -1.19255 | -0.04302 | -0.0005  |
| N | 0.00000  | 0.64047  | -0.00063 |
| C | 1.19255  | -0.04302 | -0.0005  |
| C | 1.33555  | -1.42298 | 0.00004  |
| S | 0.00000  | -2.54345 | 0.00044  |
| C | 0.00000  | 2.09373  | -0.0002  |
| C | 0.00000  | 2.77253  | -1.21785 |
| C | 0.00000  | 4.16328  | -1.219   |
| C | 0.00000  | 4.82442  | 0.00076  |
| C | 0.00000  | 4.16245  | 1.22004  |
| C | 0.00000  | 2.77169  | 1.21791  |
| C | 3.58612  | -0.73075 | -0.0004  |
| C | 2.71084  | -1.83995 | 0.00008  |
| S | 2.72041  | 0.80792  | -0.00087 |
| C | 4.96918  | -0.88828 | -0.00041 |
| C | 5.47964  | -2.18265 | 0.00008  |
| C | 4.62615  | -3.29735 | 0.00057  |
| C | 3.24955  | -3.13836 | 0.00059  |
| C | -2.71084 | -1.83995 | 0.00008  |
| C | -3.58612 | -0.73075 | -0.0004  |
| S | -2.72041 | 0.80792  | -0.00087 |
| C | -3.24955 | -3.13836 | 0.00059  |
| C | -4.62615 | -3.29735 | 0.00057  |
| C | -5.47964 | -2.18265 | 0.00008  |
| C | -4.96918 | -0.88829 | -0.00041 |
| H | 0.00000  | 2.2224   | -2.15044 |
| H | 0.00000  | 4.72576  | -2.14337 |
| H | 0.00000  | 4.72425  | 2.14483  |
| H | 0.00000  | 2.22094  | 2.15014  |
| H | 5.63135  | -0.03152 | -0.00077 |
| H | 6.55293  | -2.32912 | 0.00009  |
| H | 5.0494   | -4.29422 | 0.00097  |
| H | 2.60018  | -4.00591 | 0.00099  |



|   |          |          |          |
|---|----------|----------|----------|
| H | -2.60018 | -4.00591 | 0.00099  |
| H | -5.0494  | -4.29422 | 0.00097  |
| H | -6.55293 | -2.32912 | 0.00009  |
| H | -5.63135 | -0.03152 | -0.00077 |
| F | 0.00000  | 6.17535  | 0.00121  |

SCF Done: E(UB3LYP) = -2194.87671877 A.U. after 2 cycles

Sum of electronic and zero-point Energies= -2194.600413

Sum of electronic and thermal Energies= -2194.579338

Sum of electronic and thermal Enthalpies= -2194.578394

Sum of electronic and thermal Free Energies= -2194.652956

Excitation energies and oscillator strengths:

Excited State 1: 2.025-A 1.7675 eV 701.48 nm f=0.1540 <S\*\*2>=0.775

104A ->105A 0.15280

103B ->104B 0.98017

This state for optimization and/or second-order correction.

Total Energy, E(TD-HF/TD-KS) = -2194.81176560

Copying the excited state density for this state as the 1-particle RhoCl density.

Excited State 2: 2.016-A 1.8698 eV 663.07 nm f=0.0020 <S\*\*2>=0.766

102B ->104B 0.99510

Excited State 3: 2.028-A 2.3048 eV 537.94 nm f=0.1112 <S\*\*2>=0.778

101B ->104B 0.98793

Excited State 4: 2.077-A 2.5402 eV 488.10 nm f=0.0771 <S\*\*2>=0.828

104A ->105A 0.96349

103B ->104B -0.15585

Excited State 5: 2.131-A 2.6367 eV 470.23 nm f=0.0008 <S\*\*2>=0.886

103A ->105A -0.10749

104A ->108A 0.11629

100B ->104B 0.96069

103B ->105B 0.14212

Excited State 6: 2.012-A 2.7954 eV 443.52 nm f=0.0000 <S\*\*2>=0.762

99B ->104B 0.99707

Excited State 7: 2.018-A 3.1059 eV 399.19 nm f=0.0011 <S\*\*2>=0.768  
98B ->104B 0.99637

Excited State 8: 3.211-A 3.2277 eV 384.12 nm f=0.0095 <S\*\*2>=2.327  
101A ->105A -0.18011  
102A ->109A -0.11197  
103A ->105A -0.46947  
104A ->108A 0.36423  
100B ->104B -0.23662  
100B ->108B -0.11600  
101B ->105B -0.17056  
103B ->105B 0.63299

Excited State 9: 2.333-A 3.5120 eV 353.03 nm f=0.0058 <S\*\*2>=1.111  
99A ->105A 0.14096  
102A ->105A 0.15221  
103A ->108A 0.17634  
104A ->110A -0.11547  
104A ->114A 0.13308  
97B ->104B 0.88645  
100B ->105B -0.15442  
103B ->108B 0.14447

Excited State 10: 3.415-A 3.7037 eV 334.76 nm f=0.0071 <S\*\*2>=2.665  
101A ->108A -0.14630  
102A ->105A 0.72051  
97B ->104B -0.12341  
101B ->109B -0.14753  
102B ->105B -0.60333

Excited State 11: 2.032-A 3.7100 eV 334.19 nm f=0.0000 <S\*\*2>=0.783  
104A ->106A 0.89806  
104A ->112A -0.40752

Excited State 12: 2.602-A 3.7123 eV 333.98 nm f=0.0000 <S\*\*2>=1.443  
101A ->105A -0.24455  
102A ->108A 0.17800  
103A ->105A 0.32954

104A ->108A 0.35363  
104A ->109A -0.19311  
96B ->104B 0.69294  
101B ->105B -0.23005  
102B ->109B -0.14910  
103B ->105B -0.19621

Excited State 13: 3.469-A 3.7960 eV 326.62 nm f=0.0000 <S\*\*2>=2.758

98A ->107A -0.42462  
98A ->110A 0.13365  
100A ->106A -0.48696  
100A ->112A -0.17395  
101A ->107A 0.12390  
98B ->107B 0.42944  
98B ->110B -0.12335  
99B ->106B 0.49301  
99B ->112B 0.15703  
101B ->107B 0.12588

Excited State 14: 3.203-A 3.8452 eV 322.44 nm f=0.0000 <S\*\*2>=2.315

99A ->105A -0.22640  
99A ->110A -0.13186  
101A ->109A 0.20375  
102A ->107A -0.14890  
102A ->110A -0.29526  
103A ->108A -0.27642  
103A ->109A -0.22658  
104A ->105A -0.10557  
104A ->110A 0.14196  
104A ->114A -0.13531  
97B ->104B 0.39602  
97B ->108B 0.12870  
100B ->105B 0.24989  
100B ->110B 0.16612  
101B ->108B -0.13699

|                           |                                           |
|---------------------------|-------------------------------------------|
| 101B ->109B               | -0.17952                                  |
| 102B ->107B               | 0.13276                                   |
| 102B ->110B               | 0.26390                                   |
| 103B ->108B               | -0.33816                                  |
| Excited State 15: 2.072-A | 3.8961 eV 318.23 nm f=0.0008 <S**2>=0.824 |
| 102A ->105A               | 0.12556                                   |
| 104A ->107A               | 0.96082                                   |
| 104A ->110A               | 0.17994                                   |
| Excited State 16: 3.181-A | 4.0030 eV 309.73 nm f=0.0045 <S**2>=2.280 |
| 97A ->105A                | -0.12354                                  |
| 99A ->108A                | 0.12814                                   |
| 99A ->109A                | 0.10630                                   |
| 101A ->110A               | -0.10877                                  |
| 102A ->109A               | 0.32634                                   |
| 103A ->105A               | -0.19560                                  |
| 103A ->107A               | 0.14869                                   |
| 103A ->110A               | 0.34090                                   |
| 104A ->108A               | -0.25438                                  |
| 104A ->109A               | -0.31760                                  |
| 96B ->104B                | 0.25524                                   |
| 97B ->105B                | 0.15185                                   |
| 100B ->108B               | 0.19501                                   |
| 101B ->110B               | -0.16599                                  |
| 102B ->108B               | 0.24200                                   |
| 102B ->109B               | 0.17395                                   |
| 103B ->105B               | 0.23939                                   |
| 103B ->107B               | -0.11560                                  |
| 103B ->110B               | -0.29753                                  |
| Excited State 17: 2.807-A | 4.0557 eV 305.71 nm f=0.0072 <S**2>=1.720 |
| 101A ->105A               | -0.39262                                  |
| 102A ->108A               | 0.16253                                   |
| 102A ->109A               | 0.10289                                   |
| 103A ->105A               | 0.50878                                   |

|                           |                                           |
|---------------------------|-------------------------------------------|
| 104A ->109A               | 0.23584                                   |
| 96B ->104B                | -0.42185                                  |
| 101B ->105B               | -0.35993                                  |
| 102B ->108B               | 0.12228                                   |
| 103B ->105B               | 0.27444                                   |
| 103B ->110B               | -0.10292                                  |
| Excited State 18: 2.068-A | 4.0696 eV 304.66 nm f=0.0000 <S**2>=0.820 |
| 104A ->111A               | 0.97880                                   |
| Excited State 19: 2.038-A | 4.0761 eV 304.17 nm f=0.0000 <S**2>=0.788 |
| 104A ->106A               | 0.42942                                   |
| 104A ->112A               | 0.87868                                   |
| 104A ->116A               | -0.11531                                  |
| Excited State 20: 2.668-A | 4.0792 eV 303.94 nm f=0.0007 <S**2>=1.529 |
| 101A ->105A               | 0.31562                                   |
| 101A ->110A               | -0.16448                                  |
| 102A ->109A               | 0.21634                                   |
| 103A ->105A               | 0.11702                                   |
| 104A ->108A               | 0.51087                                   |
| 104A ->109A               | 0.49625                                   |
| 96B ->104B                | 0.17186                                   |
| 101B ->105B               | 0.31065                                   |
| 101B ->110B               | -0.15146                                  |
| 102B ->108B               | 0.11409                                   |
| 102B ->109B               | 0.22180                                   |
| 103B ->105B               | 0.16070                                   |
| Excited State 21: 2.217-A | 4.1365 eV 299.73 nm f=0.0230 <S**2>=0.979 |
| 101A ->105A               | -0.28631                                  |
| 104A ->108A               | -0.51754                                  |
| 104A ->109A               | 0.59437                                   |
| 93B ->104B                | 0.14433                                   |
| 96B ->104B                | 0.43400                                   |
| 103B ->105B               | 0.14290                                   |
| 103B ->110B               | 0.10437                                   |

Excited State 22: 2.126-A 4.1661 eV 297.60 nm f=0.1555 <S\*\*2>=0.880

|             |          |
|-------------|----------|
| 101A ->109A | -0.14288 |
| 102A ->105A | 0.41538  |
| 103A ->109A | -0.11154 |
| 104A ->107A | -0.24146 |
| 104A ->110A | 0.69272  |
| 102B ->105B | 0.45889  |

Excited State 23: 2.410-A 4.2415 eV 292.31 nm f=0.1110 <S\*\*2>=1.202

|             |          |
|-------------|----------|
| 101A ->105A | 0.24593  |
| 102A ->108A | -0.11844 |
| 103A ->105A | 0.54114  |
| 104A ->108A | -0.17899 |
| 104A ->109A | -0.27952 |
| 93B ->104B  | 0.13650  |
| 96B ->104B  | 0.12845  |
| 101B ->105B | 0.32085  |
| 101B ->110B | 0.15698  |
| 102B ->108B | -0.22506 |
| 103B ->105B | 0.51279  |

Excited State 24: 2.220-A 4.2436 eV 292.17 nm f=0.2149 <S\*\*2>=0.983

|             |          |
|-------------|----------|
| 101A ->109A | 0.10079  |
| 102A ->105A | 0.44061  |
| 104A ->110A | -0.57194 |
| 101B ->108B | -0.15532 |
| 102B ->105B | 0.59356  |
| 102B ->110B | 0.15649  |

Excited State 25: 3.187-A 4.4406 eV 279.21 nm f=0.0216 <S\*\*2>=2.290

|             |          |
|-------------|----------|
| 99A ->105A  | -0.29973 |
| 101A ->108A | -0.18699 |
| 101A ->109A | -0.10748 |
| 102A ->107A | 0.14471  |
| 102A ->110A | 0.25423  |
| 103A ->108A | -0.21430 |

103A ->109A 0.28384  
104A ->114A -0.31006  
95B ->104B 0.31806  
97B ->104B 0.12430  
100B ->105B 0.33335  
101B ->108B 0.20278  
102B ->107B -0.14491  
102B ->110B -0.25117  
103B ->109B 0.34973

Excited State 26: 3.434-A 4.6131 eV 268.76 nm f=0.0000 <S\*\*2>=2.699

98A ->106A 0.29459  
100A ->105A 0.17350  
100A ->107A 0.48217  
100A ->110A -0.13512  
101A ->106A -0.12463  
102A ->111A -0.11322  
103A ->106A 0.18381  
98B ->106B -0.30783  
99B ->105B -0.11440  
99B ->107B -0.47403  
99B ->110B 0.11876  
101B ->106B -0.14003  
102B ->111B 0.15361  
103B ->106B -0.36718  
103B ->112B 0.10920

Excited State 27: 2.619-A 4.6162 eV 268.59 nm f=0.0242 <S\*\*2>=1.464

98A ->107A -0.21925  
100A ->106A 0.23140  
101A ->105A 0.35986  
101A ->107A 0.10399  
93B ->104B 0.59844  
97B ->105B 0.10851  
98B ->107B 0.23166

99B ->106B -0.23671  
100B ->109B -0.10052  
101B ->105B -0.31742  
103B ->107B 0.20791  
103B ->114B 0.12241

Excited State 28: 3.143-A 4.6271 eV 267.96 nm f=0.0088 <S\*\*2>=2.220

98A ->107A 0.38667  
98A ->110A -0.10557  
100A ->106A -0.38446  
100A ->112A -0.11963  
101A ->105A 0.20571  
101A ->107A -0.11606  
103A ->107A 0.12740  
93B ->104B 0.40406  
98B ->107B -0.38552  
99B ->106B 0.38550  
99B ->112B 0.10658  
101B ->105B -0.20919  
101B ->107B -0.14248

Excited State 29: 3.260-A 4.6687 eV 265.57 nm f=0.0001 <S\*\*2>=2.406

100A ->105A 0.17976  
100A ->107A 0.28686  
102A ->111A 0.21519  
103A ->106A -0.14828  
103A ->112A 0.13301  
99B ->107B -0.30374  
102B ->111B -0.32654  
103B ->106B 0.65434  
103B ->112B -0.27740

Excited State 30: 3.399-A 4.7197 eV 262.70 nm f=0.0000 <S\*\*2>=2.639

101A ->111A -0.11141  
102A ->106A -0.35971  
102A ->112A 0.21158



103A ->111A 0.28912  
101B ->111B -0.16496  
102B ->106B 0.55386  
102B ->112B -0.28911  
103B ->111B -0.48807

Excited State 31: 2.427-A 4.7341 eV 261.90 nm f=0.0901 <S\*\*2>=1.223

97A ->105A -0.11766  
101A ->105A -0.33244  
101A ->110A 0.11935  
102A ->109A -0.21274  
103A ->114A -0.12327  
104A ->108A 0.20659  
93B ->104B 0.41192  
97B ->105B 0.10678  
100B ->108B 0.12801  
101B ->105B 0.47331  
101B ->110B 0.10132  
103B ->105B -0.16997  
103B ->107B -0.40978  
103B ->110B -0.24676

Excited State 32: 2.822-A 4.7449 eV 261.30 nm f=0.0199 <S\*\*2>=1.740

99A ->105A 0.33123  
101A ->108A -0.12528  
101A ->109A 0.19370  
102A ->107A -0.15462  
102A ->114A -0.13134  
103A ->108A 0.13289  
104A ->110A 0.20568  
104A ->114A -0.46421  
95B ->104B 0.47591  
100B ->105B -0.28852  
101B ->109B -0.17436  
102B ->107B 0.14950

|                           |                                           |
|---------------------------|-------------------------------------------|
| 102B ->110B               | 0.10593                                   |
| 103B ->108B               | 0.21921                                   |
| Excited State 33: 2.039-A | 4.7846 eV 259.13 nm f=0.0020 <S**2>=0.789 |
| 84B ->104B                | 0.11299                                   |
| 88B ->104B                | 0.18704                                   |
| 91B ->104B                | 0.91283                                   |
| 92B ->104B                | -0.27497                                  |
| 103B ->106B               | -0.12901                                  |
| Excited State 34: 2.876-A | 4.8026 eV 258.16 nm f=0.0002 <S**2>=1.818 |
| 98A ->106A                | -0.14648                                  |
| 100A ->105A               | 0.95120                                   |
| 98B ->106B                | 0.11344                                   |
| 99B ->107B                | 0.10939                                   |
| Excited State 35: 2.985-A | 4.8200 eV 257.23 nm f=0.0155 <S**2>=1.977 |
| 97A ->105A                | 0.15237                                   |
| 98A ->105A                | 0.10222                                   |
| 99A ->108A                | -0.19122                                  |
| 101A ->105A               | -0.28617                                  |
| 101A ->110A               | -0.17189                                  |
| 102A ->108A               | -0.20685                                  |
| 102A ->109A               | 0.23005                                   |
| 103A ->110A               | -0.15552                                  |
| 103A ->114A               | 0.18063                                   |
| 104A ->109A               | -0.22869                                  |
| 104A ->121A               | -0.23100                                  |
| 93B ->104B                | 0.38981                                   |
| 97B ->105B                | -0.18123                                  |
| 100B ->108B               | -0.18977                                  |
| 101B ->105B               | 0.11790                                   |
| 101B ->107B               | -0.10680                                  |
| 101B ->110B               | -0.21369                                  |
| 102B ->108B               | 0.19050                                   |
| 102B ->109B               | 0.22952                                   |

|                           |                                           |
|---------------------------|-------------------------------------------|
| 103B ->110B               | 0.22369                                   |
| 103B ->114B               | -0.20603                                  |
| Excited State 36: 2.637-A | 4.8383 eV 256.25 nm f=0.0002 <S**2>=1.489 |
| 100A ->105A               | 0.10587                                   |
| 100A ->107A               | -0.10848                                  |
| 101A ->106A               | -0.12004                                  |
| 102A ->111A               | -0.45181                                  |
| 103A ->106A               | 0.54850                                   |
| 103A ->112A               | -0.23836                                  |
| 104A ->113A               | 0.11518                                   |
| 102B ->111B               | 0.21011                                   |
| 103B ->106B               | 0.52898                                   |
| Excited State 37: 2.059-A | 4.8618 eV 255.02 nm f=0.0010 <S**2>=0.809 |
| 104A ->113A               | 0.95439                                   |
| 104A ->117A               | -0.17220                                  |
| Excited State 38: 3.015-A | 4.8651 eV 254.85 nm f=0.0367 <S**2>=2.023 |
| 97A ->105A                | -0.13164                                  |
| 99A ->108A                | 0.16342                                   |
| 101A ->105A               | -0.27063                                  |
| 101A ->114A               | -0.11526                                  |
| 102A ->108A               | -0.13255                                  |
| 103A ->107A               | -0.14043                                  |
| 103A ->114A               | -0.16911                                  |
| 104A ->109A               | -0.10724                                  |
| 104A ->121A               | 0.18495                                   |
| 97B ->105B                | 0.17606                                   |
| 100B ->109B               | -0.19537                                  |
| 101B ->105B               | 0.19267                                   |
| 103B ->107B               | 0.71891                                   |
| 103B ->114B               | 0.18629                                   |
| Excited State 39: 2.459-A | 4.8688 eV 254.65 nm f=0.0142 <S**2>=1.262 |
| 99A ->105A                | -0.18123                                  |
| 103A ->109A               | -0.10786                                  |

|                           |                                           |
|---------------------------|-------------------------------------------|
| 104A ->114A               | 0.30782                                   |
| 95B ->104B                | 0.66179                                   |
| 100B ->105B               | -0.34191                                  |
| 100B ->110B               | 0.15702                                   |
| 101B ->108B               | 0.10664                                   |
| 103B ->108B               | -0.35044                                  |
| 103B ->109B               | -0.26381                                  |
| Excited State 40: 2.024-A | 4.8697 eV 254.60 nm f=0.0000 <S**2>=0.774 |
| 94B ->104B                | 0.99173                                   |
| Excited State 41: 2.094-A | 4.8954 eV 253.27 nm f=0.0000 <S**2>=0.846 |
| 101A ->111A               | 0.12472                                   |
| 102A ->106A               | 0.70854                                   |
| 102A ->112A               | -0.21555                                  |
| 103A ->111A               | -0.29707                                  |
| 102B ->106B               | 0.52627                                   |
| 103B ->111B               | -0.18987                                  |
| Excited State 42: 2.304-A | 4.9284 eV 251.57 nm f=0.2607 <S**2>=1.078 |
| 99A ->105A                | 0.28182                                   |
| 101A ->108A               | -0.12246                                  |
| 103A ->108A               | 0.13275                                   |
| 104A ->114A               | 0.55177                                   |
| 95B ->104B                | 0.29074                                   |
| 100B ->105B               | 0.53219                                   |
| 101B ->109B               | -0.10508                                  |
| 102B ->107B               | 0.32272                                   |
| 103B ->109B               | 0.11293                                   |
| Excited State 43: 2.936-A | 4.9419 eV 250.88 nm f=0.0001 <S**2>=1.905 |
| 98A ->106A                | -0.33847                                  |
| 100A ->107A               | 0.21925                                   |
| 101A ->106A               | 0.10657                                   |
| 102A ->111A               | -0.12487                                  |
| 103A ->106A               | -0.19604                                  |
| 91B ->104B                | 0.18159                                   |

92B ->104B 0.51795  
98B ->106B 0.36107  
99B ->105B -0.35431  
99B ->107B -0.21507  
101B ->106B 0.10520  
102B ->111B 0.23939  
103B ->112B 0.15935

Excited State 44: 2.565-A 4.9489 eV 250.53 nm f=0.0000 <S\*\*2>=1.395

98A ->106A 0.26015  
100A ->107A -0.19087  
103A ->106A 0.13191  
91B ->104B 0.19509  
92B ->104B 0.78773  
98B ->106B -0.26838  
99B ->107B 0.18210  
102B ->111B -0.15103  
103B ->112B -0.12980

Excited State 45: 2.684-A 4.9552 eV 250.21 nm f=0.0090 <S\*\*2>=1.551

99A ->105A 0.68067  
99A ->110A -0.12891  
101A ->109A -0.16566  
102A ->107A 0.23624  
102A ->114A 0.10682  
103A ->108A -0.18035  
103A ->109A -0.14485  
104A ->110A -0.14922  
104A ->114A -0.29534  
100B ->105B 0.26336  
102B ->107B -0.13767  
103B ->108B -0.28094  
103B ->109B -0.15635

Excited State 46: 3.211-A 4.9804 eV 248.95 nm f=0.0028 <S\*\*2>=2.327

98A ->105A -0.11930

|                                                                     |          |
|---------------------------------------------------------------------|----------|
| 99A ->108A                                                          | -0.12070 |
| 101A ->114A                                                         | 0.19497  |
| 102A ->108A                                                         | 0.52125  |
| 104A ->121A                                                         | -0.16495 |
| 93B ->104B                                                          | 0.11879  |
| 97B ->105B                                                          | -0.10308 |
| 100B ->109B                                                         | 0.18112  |
| 101B ->105B                                                         | 0.27582  |
| 101B ->114B                                                         | 0.18509  |
| 102B ->108B                                                         | 0.25191  |
| 102B ->109B                                                         | -0.31566 |
| 103B ->107B                                                         | 0.37941  |
| 103B ->110B                                                         | -0.20706 |
| 103B ->114B                                                         | -0.12833 |
| Excited State 47: 2.895-A 4.9991 eV 248.01 nm f=0.0003 <S**2>=1.846 |          |
| 100A ->107A                                                         | 0.16245  |
| 103A ->106A                                                         | -0.30253 |
| 92B ->104B                                                          | 0.12382  |
| 99B ->105B                                                          | 0.83732  |
| 101B ->106B                                                         | -0.11365 |
| 102B ->111B                                                         | 0.29265  |
| 103B ->106B                                                         | 0.14163  |
| 103B ->112B                                                         | 0.11101  |
| Excited State 48: 3.188-A 5.0071 eV 247.62 nm f=0.0000 <S**2>=2.291 |          |
| 102A ->106A                                                         | -0.28480 |
| 103A ->111A                                                         | -0.16114 |
| 104A ->116A                                                         | 0.12339  |
| 104A ->118A                                                         | -0.16509 |
| 102B ->106B                                                         | 0.56456  |
| 103B ->111B                                                         | 0.68820  |
| Excited State 49: 3.309-A 5.0143 eV 247.26 nm f=0.0116 <S**2>=2.488 |          |
| 99A ->105A                                                          | 0.30705  |
| 101A ->108A                                                         | -0.18922 |

|             |          |
|-------------|----------|
| 103A ->108A | -0.37205 |
| 103A ->109A | 0.13725  |
| 104A ->105A | -0.11239 |
| 104A ->114A | 0.23335  |
| 95B ->104B  | -0.20124 |
| 100B ->105B | -0.43748 |
| 100B ->114B | -0.10122 |
| 101B ->109B | -0.11433 |
| 103B ->108B | -0.24243 |
| 103B ->109B | 0.51166  |

Excited State 50: 3.091-A 5.0261 eV 246.68 nm f=0.0000 <S\*\*2>=2.138

|             |          |
|-------------|----------|
| 98A ->106A  | -0.25118 |
| 100A ->107A | 0.15011  |
| 101A ->106A | 0.14937  |
| 103A ->106A | 0.47760  |
| 103A ->112A | -0.11923 |
| 98B ->106B  | 0.26302  |
| 99B ->105B  | 0.36726  |
| 99B ->107B  | -0.21357 |
| 101B ->106B | 0.30533  |
| 102B ->111B | -0.43777 |
| 103B ->106B | -0.20706 |
| 103B ->112B | -0.12320 |

SavETr: write IOETrn= 770 NScale= 10 NData= 16 NLR=1 LETran= 910.

Leave Link 914 at Sat Sep 15 18:09:14 2018, MaxMem= 1610612736 cpu: 134397.4

(Enter /software/gaussian/g09/ivybridge\_xe2015/g09/l601.exe)

Copying SCF densities to generalized density rwf, IOpCl= 1 IROHF=0.

## 6.8 Computed zyx-coordinates of the S<sub>0</sub> state of compound 5<sup>2+</sup> and excitation energies (uB3LYP/6-311++G\*\*, IEFPCM CH<sub>2</sub>Cl<sub>2</sub>)

Charge = 2 Multiplicity = 1

|   |          |          |         |
|---|----------|----------|---------|
| C | -1.31222 | -2.16806 | 0.00008 |
|---|----------|----------|---------|

|   |          |          |          |
|---|----------|----------|----------|
| C | -1.22095 | -0.74156 | -0.00002 |
| N | 0.00002  | -0.1142  | 0.00000  |
| C | 1.22103  | -0.74148 | 0.00002  |
| C | 1.31239  | -2.16798 | -0.00008 |
| S | 0.00012  | -3.24341 | 0.00000  |
| C | 2.54542  | -0.13881 | 0.00009  |
| C | 3.54865  | -1.14093 | -0.00006 |
| S | 2.91116  | -2.78037 | -0.00021 |
| S | -2.91097 | -2.78055 | 0.00021  |
| C | -3.54855 | -1.14114 | 0.00006  |
| C | -2.54537 | -0.13897 | -0.00009 |
| C | -0.00005 | 1.34835  | 0.00000  |
| C | -4.90767 | -0.86524 | 0.00006  |
| C | -5.30128 | 0.4692   | -0.00013 |
| C | -4.34354 | 1.4884   | -0.00032 |
| C | -2.98754 | 1.20448  | -0.00029 |
| C | 2.98753  | 1.20466  | 0.00029  |
| C | 4.34351  | 1.48865  | 0.00032  |
| C | 5.30131  | 0.4695   | 0.00012  |
| C | 4.90776  | -0.86496 | -0.00006 |
| C | -0.00028 | 2.01526  | 1.22084  |
| C | -0.00035 | 3.40642  | 1.22055  |
| C | -0.00021 | 4.0698   | 0.00000  |
| C | 0.00001  | 3.40642  | -1.22055 |
| C | 0.00009  | 2.01526  | -1.22084 |
| F | -0.00028 | 5.41493  | 0.00000  |
| H | -5.63966 | -1.66314 | 0.00019  |
| H | -6.35593 | 0.71464  | -0.00014 |
| H | -4.66135 | 2.52309  | -0.00049 |
| H | -2.29657 | 2.0274   | -0.00045 |
| H | 2.29652  | 2.02755  | 0.00045  |
| H | 4.66127  | 2.52335  | 0.00048  |
| H | 6.35594  | 0.71499  | 0.00013  |



|   |          |          |          |
|---|----------|----------|----------|
| H | 5.63979  | -1.66282 | -0.0002  |
| H | -0.00038 | 1.46488  | 2.15326  |
| H | -0.00052 | 3.96793  | 2.14536  |
| H | 0.00011  | 3.96793  | -2.14536 |
| H | 0.00024  | 1.46488  | -2.15326 |

SCF Done: E(UB3LYP) = -2194.63413811 A.U. after 2 cycles

Sum of electronic and zero-point Energies= -2194.356249

Sum of electronic and thermal Energies= -2194.335685

Sum of electronic and thermal Enthalpies= -2194.334741

Sum of electronic and thermal Free Energies= -2194.406370

Excitation energies and oscillator strengths:

Excited State 1: 3.000-A 0.9692 eV 1279.29 nm f=0.0000 <S\*\*2>=2.000

100A ->104A 0.11244

103A ->104A 0.69939

100B ->104B -0.11244

103B ->104B -0.69939

103A <-104A 0.11375

103B <-104B -0.11375

This state for optimization and/or second-order correction.

Total Energy, E(TD-HF/TD-KS) = -2194.59852194

Copying the excited state density for this state as the 1-particle RhoCI density.

Excited State 2: 3.000-A 1.2533 eV 989.30 nm f=0.0000 <S\*\*2>=2.000

102A ->104A 0.70066

102B ->104B -0.70066

Excited State 3: 1.000-A 1.6231 eV 763.86 nm f=0.0035 <S\*\*2>=0.000

102A ->104A 0.70574

102B ->104B 0.70574

Excited State 4: 1.000-A 1.6845 eV 736.01 nm f=0.2255 <S\*\*2>=0.000

100A ->104A -0.20492

103A ->104A 0.67708

100B ->104B -0.20492

103B ->104B      0.67708  
 Excited State 5: 3.000-A    1.8116 eV 684.40 nm f=0.0000 <S\*\*2>=2.000  
 100A ->104A      0.69309  
 103A ->104A      -0.10891  
 100B ->104B      -0.69309  
 103B ->104B      0.10891  
 Excited State 6: 3.000-A    2.0109 eV 616.55 nm f=0.0000 <S\*\*2>=2.000  
 101A ->104A      0.70516  
 101B ->104B      -0.70516  
 Excited State 7: 1.000-A    2.0256 eV 612.08 nm f=0.0000 <S\*\*2>=0.000  
 101A ->104A      0.70547  
 101B ->104B      0.70547  
 Excited State 8: 3.000-A    2.1109 eV 587.36 nm f=0.0000 <S\*\*2>=2.000  
 98A ->104A      -0.69001  
 103A ->105A      0.10906  
 98B ->104B      0.69001  
 103B ->105B      -0.10906  
 Excited State 9: 1.000-A    2.2029 eV 562.83 nm f=0.1378 <S\*\*2>=0.000  
 99A ->104A      0.23303  
 100A ->104A      0.63910  
 103A ->104A      0.18174  
 99B ->104B      0.23303  
 100B ->104B      0.63910  
 103B ->104B      0.18174  
 Excited State 10: 3.000-A    2.3169 eV 535.14 nm f=0.0000 <S\*\*2>=2.000  
 99A ->104A      0.69833  
 99B ->104B      -0.69833  
 Excited State 11: 1.000-A    2.3963 eV 517.40 nm f=0.0778 <S\*\*2>=0.000  
 99A ->104A      0.66571  
 100A ->104A      -0.21105  
 99B ->104B      0.66571  
 100B ->104B      -0.21105  
 Excited State 12: 1.000-A    2.6377 eV 470.05 nm f=0.0111 <S\*\*2>=0.000

|                   |          |           |           |          |              |
|-------------------|----------|-----------|-----------|----------|--------------|
| 98A ->104A        | 0.69899  |           |           |          |              |
| 98B ->104B        | 0.69899  |           |           |          |              |
| Excited State 13: | 3.000-A  | 2.8480 eV | 435.33 nm | f=0.0000 | <S**2>=2.000 |
| 96A ->104A        | -0.23772 |           |           |          |              |
| 98A ->104A        | -0.11822 |           |           |          |              |
| 103A ->105A       | -0.62208 |           |           |          |              |
| 96B ->104B        | 0.23772  |           |           |          |              |
| 98B ->104B        | 0.11822  |           |           |          |              |
| 103B ->105B       | 0.62208  |           |           |          |              |
| Excited State 14: | 3.000-A  | 3.0562 eV | 405.69 nm | f=0.0000 | <S**2>=2.000 |
| 97A ->104A        | 0.61554  |           |           |          |              |
| 102A ->105A       | 0.29449  |           |           |          |              |
| 103A ->106A       | -0.11123 |           |           |          |              |
| 97B ->104B        | -0.61554 |           |           |          |              |
| 102B ->105B       | -0.29449 |           |           |          |              |
| 103B ->106B       | 0.11123  |           |           |          |              |
| Excited State 15: | 3.000-A  | 3.1829 eV | 389.53 nm | f=0.0000 | <S**2>=2.000 |
| 96A ->104A        | -0.61431 |           |           |          |              |
| 100A ->105A       | 0.18347  |           |           |          |              |
| 102A ->106A       | 0.12742  |           |           |          |              |
| 103A ->105A       | 0.21997  |           |           |          |              |
| 96B ->104B        | 0.61431  |           |           |          |              |
| 100B ->105B       | -0.18347 |           |           |          |              |
| 102B ->106B       | -0.12742 |           |           |          |              |
| 103B ->105B       | -0.21997 |           |           |          |              |
| Excited State 16: | 3.000-A  | 3.2287 eV | 384.01 nm | f=0.0000 | <S**2>=2.000 |
| 92A ->104A        | -0.12240 |           |           |          |              |
| 97A ->104A        | -0.29801 |           |           |          |              |
| 100A ->106A       | 0.12848  |           |           |          |              |
| 102A ->105A       | 0.60338  |           |           |          |              |
| 92B ->104B        | 0.12240  |           |           |          |              |
| 97B ->104B        | 0.29801  |           |           |          |              |
| 100B ->106B       | -0.12848 |           |           |          |              |

|                   |          |           |           |          |              |
|-------------------|----------|-----------|-----------|----------|--------------|
| 102B ->105B       | -0.60338 |           |           |          |              |
| Excited State 17: | 1.000-A  | 3.4860 eV | 355.67 nm | f=0.0001 | <S**2>=0.000 |
| 97A ->104A        | 0.66572  |           |           |          |              |
| 102A ->105A       | -0.21397 |           |           |          |              |
| 97B ->104B        | 0.66572  |           |           |          |              |
| 102B ->105B       | -0.21397 |           |           |          |              |
| Excited State 18: | 1.000-A  | 3.6260 eV | 341.93 nm | f=0.0907 | <S**2>=0.000 |
| 96A ->104A        | -0.28608 |           |           |          |              |
| 100A ->105A       | -0.10671 |           |           |          |              |
| 103A ->105A       | 0.63112  |           |           |          |              |
| 96B ->104B        | -0.28608 |           |           |          |              |
| 100B ->105B       | -0.10671 |           |           |          |              |
| 103B ->105B       | 0.63112  |           |           |          |              |
| Excited State 19: | 3.000-A  | 3.6615 eV | 338.61 nm | f=0.0000 | <S**2>=2.000 |
| 86A ->104A        | -0.10313 |           |           |          |              |
| 96A ->104A        | -0.18045 |           |           |          |              |
| 100A ->105A       | -0.60982 |           |           |          |              |
| 102A ->106A       | -0.21776 |           |           |          |              |
| 103A ->105A       | 0.12383  |           |           |          |              |
| 86B ->104B        | 0.10313  |           |           |          |              |
| 96B ->104B        | 0.18045  |           |           |          |              |
| 100B ->105B       | 0.60982  |           |           |          |              |
| 102B ->106B       | 0.21776  |           |           |          |              |
| 103B ->105B       | -0.12383 |           |           |          |              |
| Excited State 20: | 3.000-A  | 3.7017 eV | 334.94 nm | f=0.0000 | <S**2>=2.000 |
| 97A ->104A        | 0.10596  |           |           |          |              |
| 98A ->105A        | -0.35258 |           |           |          |              |
| 98A ->113A        | 0.14552  |           |           |          |              |
| 100A ->106A       | 0.13751  |           |           |          |              |
| 100A ->110A       | -0.15802 |           |           |          |              |
| 102A ->107A       | 0.16954  |           |           |          |              |
| 102A ->112A       | -0.19247 |           |           |          |              |
| 103A ->106A       | 0.37862  |           |           |          |              |

103A ->110A 0.23201  
 97B ->104B -0.10596  
 98B ->105B 0.35258  
 98B ->113B -0.14552  
 100B ->106B -0.13751  
 100B ->110B 0.15802  
 102B ->107B -0.16954  
 102B ->112B 0.19247  
 103B ->106B -0.37862  
 103B ->110B -0.23201

Excited State 21: 1.000-A 3.7348 eV 331.97 nm f=0.0206 <S\*\*2>=0.000

96A ->104A 0.62121  
 100A ->105A 0.11508  
 103A ->105A 0.29707  
 96B ->104B 0.62121  
 100B ->105B 0.11508  
 103B ->105B 0.29707

Excited State 22: 3.000-A 3.7912 eV 327.03 nm f=0.0000 <S\*\*2>=2.000

99A ->107A 0.39302  
 99A ->112A 0.20277  
 101A ->108A 0.36536  
 101A ->109A -0.36421  
 103A ->107A 0.13048  
 99B ->107B -0.39302  
 99B ->112B -0.20277  
 101B ->108B -0.36536  
 101B ->109B 0.36421  
 103B ->107B -0.13048

Excited State 23: 1.000-A 3.8198 eV 324.58 nm f=0.5783 <S\*\*2>=0.000

97A ->104A 0.20942  
 102A ->105A 0.66186  
 97B ->104B 0.20942  
 102B ->105B 0.66186

Excited State 24: 3.000-A 4.0020 eV 309.81 nm f=0.0000 <S\*\*2>=2.000

|             |          |
|-------------|----------|
| 97A ->105A  | 0.17530  |
| 98A ->106A  | 0.19095  |
| 98A ->110A  | 0.13334  |
| 99A ->105A  | -0.12027 |
| 100A ->107A | -0.13895 |
| 100A ->112A | 0.18102  |
| 102A ->110A | 0.37540  |
| 103A ->107A | 0.27822  |
| 103A ->112A | -0.22068 |
| 103A ->113A | 0.17128  |
| 97B ->105B  | -0.17530 |
| 98B ->106B  | -0.19095 |
| 98B ->110B  | -0.13334 |
| 99B ->105B  | 0.12027  |
| 100B ->107B | 0.13895  |
| 100B ->112B | -0.18102 |
| 102B ->110B | -0.37540 |
| 103B ->107B | -0.27822 |
| 103B ->112B | 0.22068  |
| 103B ->113B | -0.17128 |

Excited State 25: 3.000-A 4.1207 eV 300.88 nm f=0.0000 <S\*\*2>=2.000

|             |          |
|-------------|----------|
| 101A ->105A | -0.70021 |
| 101B ->105B | 0.70021  |

Excited State 26: 1.000-A 4.1448 eV 299.13 nm f=0.0004 <S\*\*2>=0.000

|             |         |
|-------------|---------|
| 101A ->105A | 0.70582 |
| 101B ->105B | 0.70582 |

Excited State 27: 3.000-A 4.2178 eV 293.96 nm f=0.0000 <S\*\*2>=2.000

|             |          |
|-------------|----------|
| 92A ->104A  | -0.56501 |
| 100A ->106A | 0.14434  |
| 100A ->110A | 0.10123  |
| 102A ->105A | -0.12383 |
| 102A ->107A | -0.14753 |

|                           |                                           |
|---------------------------|-------------------------------------------|
| 102A ->112A               | 0.12792                                   |
| 103A ->106A               | 0.12371                                   |
| 103A ->110A               | -0.19654                                  |
| 92B ->104B                | 0.56501                                   |
| 100B ->106B               | -0.14434                                  |
| 100B ->110B               | -0.10123                                  |
| 102B ->105B               | 0.12383                                   |
| 102B ->107B               | 0.14753                                   |
| 102B ->112B               | -0.12792                                  |
| 103B ->106B               | -0.12371                                  |
| 103B ->110B               | 0.19654                                   |
| Excited State 28: 3.000-A | 4.2185 eV 293.90 nm f=0.0000 <S**2>=2.000 |
| 95A ->104A                | -0.70208                                  |
| 95B ->104B                | 0.70208                                   |
| Excited State 29: 1.000-A | 4.2588 eV 291.13 nm f=0.0000 <S**2>=0.000 |
| 95A ->104A                | 0.70411                                   |
| 95B ->104B                | 0.70411                                   |
| Excited State 30: 3.000-A | 4.3648 eV 284.05 nm f=0.0000 <S**2>=2.000 |
| 92A ->104A                | 0.27100                                   |
| 98A ->105A                | -0.44647                                  |
| 100A ->110A               | 0.21105                                   |
| 102A ->107A               | -0.23353                                  |
| 102A ->112A               | 0.23286                                   |
| 103A ->110A               | -0.17875                                  |
| 92B ->104B                | -0.27100                                  |
| 98B ->105B                | 0.44647                                   |
| 100B ->110B               | -0.21105                                  |
| 102B ->107B               | 0.23353                                   |
| 102B ->112B               | -0.23286                                  |
| 103B ->110B               | 0.17875                                   |
| Excited State 31: 3.000-A | 4.3911 eV 282.35 nm f=0.0000 <S**2>=2.000 |
| 97A ->105A                | 0.13398                                   |
| 99A ->105A                | -0.61924                                  |

|                           |                                           |
|---------------------------|-------------------------------------------|
| 101A ->108A               | 0.12821                                   |
| 101A ->109A               | -0.12231                                  |
| 102A ->110A               | -0.11488                                  |
| 97B ->105B                | -0.13398                                  |
| 99B ->105B                | 0.61924                                   |
| 101B ->108B               | -0.12821                                  |
| 101B ->109B               | 0.12231                                   |
| 102B ->110B               | 0.11488                                   |
| Excited State 32: 1.000-A | 4.4077 eV 281.29 nm f=0.0275 <S**2>=0.000 |
| 96A ->104A                | -0.14048                                  |
| 100A ->105A               | 0.66458                                   |
| 96B ->104B                | -0.14048                                  |
| 100B ->105B               | 0.66458                                   |
| Excited State 33: 3.000-A | 4.4366 eV 279.46 nm f=0.0000 <S**2>=2.000 |
| 88A ->104A                | -0.11034                                  |
| 94A ->104A                | -0.69455                                  |
| 88B ->104B                | 0.11034                                   |
| 94B ->104B                | 0.69455                                   |
| Excited State 34: 3.000-A | 4.4723 eV 277.23 nm f=0.0000 <S**2>=2.000 |
| 92A ->104A                | 0.14604                                   |
| 98A ->105A                | 0.36845                                   |
| 102A ->105A               | 0.11287                                   |
| 103A ->106A               | 0.51989                                   |
| 103A ->110A               | -0.12146                                  |
| 92B ->104B                | -0.14604                                  |
| 98B ->105B                | -0.36845                                  |
| 102B ->105B               | -0.11287                                  |
| 103B ->106B               | -0.51989                                  |
| 103B ->110B               | 0.12146                                   |
| Excited State 35: 1.000-A | 4.4774 eV 276.91 nm f=0.0143 <S**2>=0.000 |
| 99A ->105A                | 0.70362                                   |
| 99B ->105B                | 0.70362                                   |



Excited State 36: 1.000-A 4.4918 eV 276.02 nm f=0.0006 <S\*\*2>=0.000  
94A ->104A 0.70242  
94B ->104B 0.70242

Excited State 37: 1.000-A 4.5195 eV 274.33 nm f=0.3150 <S\*\*2>=0.000  
98A ->105A 0.69835  
98B ->105B 0.69835

Excited State 38: 3.000-A 4.5346 eV 273.42 nm f=0.0000 <S\*\*2>=2.000  
83A ->104A 0.14524  
86A ->104A 0.20702  
87A ->104A 0.23937  
93A ->104A -0.51236  
97A ->105A 0.10460  
99A ->105A 0.16408  
100A ->105A -0.12381  
102A ->106A 0.10006  
103A ->113A 0.10014  
83B ->104B -0.14524  
86B ->104B -0.20702  
87B ->104B -0.23937  
93B ->104B 0.51236  
97B ->105B -0.10460  
99B ->105B -0.16408  
100B ->105B 0.12381  
102B ->106B -0.10006  
103B ->113B -0.10014

Excited State 39: 3.000-A 4.6052 eV 269.23 nm f=0.0000 <S\*\*2>=2.000  
93A ->104A 0.21102  
97A ->105A 0.11584  
99A ->107A 0.19881  
100A ->105A -0.16293  
100A ->112A -0.11182  
101A ->108A -0.16288

|             |          |
|-------------|----------|
| 101A ->109A | 0.15031  |
| 102A ->106A | 0.45339  |
| 102A ->110A | -0.12693 |
| 103A ->107A | 0.17766  |
| 93B ->104B  | -0.21102 |
| 97B ->105B  | -0.11584 |
| 99B ->107B  | -0.19881 |
| 100B ->105B | 0.16293  |
| 100B ->112B | 0.11182  |
| 101B ->108B | 0.16288  |
| 101B ->109B | -0.15031 |
| 102B ->106B | -0.45339 |
| 102B ->110B | 0.12693  |
| 103B ->107B | -0.17766 |

Excited State 40: 3.000-A 4.6067 eV 269.14 nm f=0.0000 <S\*\*2>=2.000

|             |          |
|-------------|----------|
| 99A ->108A  | 0.19075  |
| 99A ->109A  | -0.18423 |
| 101A ->107A | 0.58279  |
| 101A ->112A | 0.22879  |
| 103A ->108A | 0.14352  |
| 99B ->108B  | -0.19075 |
| 99B ->109B  | 0.18423  |
| 101B ->107B | -0.58279 |
| 101B ->112B | -0.22879 |
| 103B ->108B | -0.14352 |

Excited State 41: 3.000-A 4.6511 eV 266.57 nm f=0.0000 <S\*\*2>=2.000

|             |          |
|-------------|----------|
| 99A ->105A  | -0.14925 |
| 99A ->107A  | 0.37958  |
| 99A ->112A  | 0.16476  |
| 100A ->105A | 0.12953  |
| 101A ->108A | -0.26433 |
| 101A ->109A | 0.24307  |
| 102A ->106A | -0.34018 |

|                           |                                           |
|---------------------------|-------------------------------------------|
| 99B ->105B                | 0.14925                                   |
| 99B ->107B                | -0.37958                                  |
| 99B ->112B                | -0.16476                                  |
| 100B ->105B               | -0.12953                                  |
| 101B ->108B               | 0.26433                                   |
| 101B ->109B               | -0.24307                                  |
| 102B ->106B               | 0.34018                                   |
| Excited State 42: 1.000-A | 4.6899 eV 264.36 nm f=0.0270 <S**2>=0.000 |
| 93A ->104A                | 0.70176                                   |
| 93B ->104B                | 0.70176                                   |
| Excited State 43: 1.000-A | 4.7261 eV 262.34 nm f=0.0024 <S**2>=0.000 |
| 92A ->104A                | 0.67893                                   |
| 103A ->106A               | 0.12029                                   |
| 92B ->104B                | 0.67893                                   |
| 103B ->106B               | 0.12029                                   |
| Excited State 44: 3.000-A | 4.7328 eV 261.97 nm f=0.0000 <S**2>=2.000 |
| 91A ->104A                | 0.69914                                   |
| 91B ->104B                | -0.69914                                  |
| Excited State 45: 3.000-A | 4.7419 eV 261.47 nm f=0.0000 <S**2>=2.000 |
| 88A ->104A                | -0.17713                                  |
| 90A ->104A                | -0.20931                                  |
| 101A ->107A               | 0.12512                                   |
| 102A ->111A               | 0.23501                                   |
| 103A ->108A               | -0.53975                                  |
| 103A ->109A               | -0.16673                                  |
| 88B ->104B                | 0.17713                                   |
| 90B ->104B                | 0.20931                                   |
| 101B ->107B               | -0.12512                                  |
| 102B ->111B               | -0.23501                                  |
| 103B ->108B               | 0.53975                                   |
| 103B ->109B               | 0.16673                                   |
| Excited State 46: 3.000-A | 4.7552 eV 260.74 nm f=0.0000 <S**2>=2.000 |
| 82A ->104A                | -0.12993                                  |

|             |          |
|-------------|----------|
| 84A ->104A  | 0.10355  |
| 88A ->104A  | -0.38010 |
| 90A ->104A  | -0.47640 |
| 102A ->111A | -0.13004 |
| 103A ->108A | 0.23480  |
| 82B ->104B  | 0.12993  |
| 84B ->104B  | -0.10355 |
| 88B ->104B  | 0.38010  |
| 90B ->104B  | 0.47640  |
| 102B ->111B | 0.13004  |
| 103B ->108B | -0.23480 |

Excited State 47: 3.000-A 4.7606 eV 260.44 nm f=0.0000 <S\*\*2>=2.000

|             |          |
|-------------|----------|
| 93A ->104A  | 0.28186  |
| 97A ->105A  | 0.29539  |
| 98A ->106A  | 0.30649  |
| 99A ->105A  | 0.17196  |
| 100A ->107A | 0.11617  |
| 100A ->113A | 0.10824  |
| 102A ->106A | -0.19725 |
| 102A ->110A | -0.17802 |
| 103A ->113A | 0.21650  |
| 93B ->104B  | -0.28186 |
| 97B ->105B  | -0.29539 |
| 98B ->106B  | -0.30649 |
| 99B ->105B  | -0.17196 |
| 100B ->107B | -0.11617 |
| 100B ->113B | -0.10824 |
| 102B ->106B | 0.19725  |
| 102B ->110B | 0.17802  |
| 103B ->113B | -0.21650 |

Excited State 48: 1.000-A 4.7864 eV 259.03 nm f=0.0000 <S\*\*2>=0.000

|            |         |
|------------|---------|
| 91A ->104A | 0.70215 |
| 91B ->104B | 0.70215 |

Excited State 49: 3.000-A 4.7892 eV 258.88 nm f=0.0000 <S\*\*2>=2.000

|             |          |
|-------------|----------|
| 100A ->111A | -0.10800 |
| 102A ->108A | -0.51176 |
| 102A ->109A | -0.25028 |
| 102A ->115A | -0.10179 |
| 103A ->111A | 0.35222  |
| 100B ->111B | 0.10800  |
| 102B ->108B | 0.51176  |
| 102B ->109B | 0.25028  |
| 102B ->115B | 0.10179  |
| 103B ->111B | -0.35222 |

Excited State 50: 3.000-A 4.8155 eV 257.47 nm f=0.0000 <S\*\*2>=2.000

|             |          |
|-------------|----------|
| 92A ->104A  | 0.20406  |
| 96A ->105A  | -0.25600 |
| 100A ->106A | 0.44610  |
| 100A ->110A | -0.12183 |
| 102A ->112A | -0.10398 |
| 102A ->113A | -0.24030 |
| 103A ->106A | -0.12648 |
| 103A ->110A | -0.23238 |
| 92B ->104B  | -0.20406 |
| 96B ->105B  | 0.25600  |
| 100B ->106B | -0.44610 |
| 100B ->110B | 0.12183  |
| 102B ->112B | 0.10398  |
| 102B ->113B | 0.24030  |
| 103B ->106B | 0.12648  |
| 103B ->110B | 0.23238  |

SavETr: write IOETrn= 770 NScale= 10 NData= 16 NLR=1 LETran= 910.

Leave Link 914 at Wed Oct 10 00:39:56 2018, MaxMem= 1879048192 cpu: 163090.9

(Enter /software/gaussian/g09/ivybridge\_xe2015/g09/l601.exe)

Copying SCF densities to generalized density rwf, IOpCI= 1 IROHF=0.

6.9 Computed zyx-coordinates of the  $S_0$  state of compound  $6^{2+}$  and excitation energies (uB3LYP/6-311++G\*\*, IEFPCM  $CH_2Cl_2$ )

Charge = 2 Multiplicity = 1

|   |          |          |          |
|---|----------|----------|----------|
| C | -0.31494 | -2.24811 | 0.02175  |
| C | -0.94876 | -0.96624 | -0.01296 |
| N | -0.19463 | 0.1761   | -0.02041 |
| C | 1.16158  | 0.1907   | -0.02376 |
| C | 1.99421  | -0.95851 | -0.00646 |
| S | 1.36112  | -2.5388  | 0.03232  |
| S | -1.41285 | -3.56537 | 0.05296  |
| C | -2.77598 | -2.44779 | 0.00806  |
| C | -2.38914 | -1.08501 | -0.03123 |
| S | 2.06428  | 1.6738   | -0.03642 |
| C | 3.57927  | 0.76184  | -0.02155 |
| C | 3.38206  | -0.64056 | -0.00558 |
| C | -0.83505 | 1.49705  | -0.00011 |
| C | -1.06669 | 2.15148  | -1.20758 |
| C | -1.65016 | 3.41338  | -1.17886 |
| C | -1.97295 | 3.96831  | 0.05209  |
| C | -1.73668 | 3.32215  | 1.25832  |
| C | -1.15429 | 2.06022  | 1.2335   |
| F | -2.53915 | 5.18844  | 0.07757  |
| C | -4.10094 | -2.85681 | -0.00071 |
| C | -5.0856  | -1.8742  | -0.05725 |
| C | -4.73965 | -0.51858 | -0.10523 |
| C | -3.41517 | -0.11514 | -0.09201 |
| C | 4.85005  | 1.3178   | -0.02444 |
| C | 5.93815  | 0.44681  | -0.00959 |
| C | 5.7644   | -0.94853 | 0.0077   |
| C | 4.49906  | -1.50177 | 0.01004  |
| H | -0.80854 | 1.68979  | -2.15233 |
| H | -1.85247 | 3.9576   | -2.09184 |

|   |          |          |          |
|---|----------|----------|----------|
| H | -2.00257 | 3.79825  | 2.19282  |
| H | -0.95891 | 1.52798  | 2.15606  |
| H | -4.36306 | -3.90614 | 0.03183  |
| H | -6.12825 | -2.16655 | -0.06631 |
| H | -5.5182  | 0.23174  | -0.15341 |
| H | -3.19253 | 0.9372   | -0.1323  |
| H | 4.99773  | 2.38977  | -0.0368  |
| H | 6.94008  | 0.85795  | -0.01094 |
| H | 6.63299  | -1.59399 | 0.01907  |
| H | 4.37101  | -2.57737 | 0.02241  |

SCF Done: E(UB3LYP) = -2194.64452845 A.U. after 2 cycles

Sum of electronic and zero-point Energies= -2194.366512

Sum of electronic and thermal Energies= -2194.345977

Sum of electronic and thermal Enthalpies= -2194.345032

Sum of electronic and thermal Free Energies= -2194.416284

Excitation energies and oscillator strengths:

Excited State 1: 3.000-A 0.9369 eV 1323.33 nm f=0.0000 <S\*\*2>=2.000

102A ->104A 0.18721

103A ->104A -0.68360

102B ->104B -0.18721

103B ->104B 0.68360

103A <-104A -0.11107

103B <-104B 0.11107

This state for optimization and/or second-order correction.

Total Energy, E(TD-HF/TD-KS) = -2194.61009760

Copying the excited state density for this state as the 1-particle RhoCI density.

Excited State 2: 3.000-A 1.3264 eV 934.71 nm f=0.0000 <S\*\*2>=2.000

102A ->104A 0.67296

103A ->104A 0.18096

102B ->104B -0.67296

103B ->104B -0.18096

Excited State 3: 1.000-A 1.5177 eV 816.92 nm f=0.0626 <S\*\*2>=0.000

102A ->104A 0.32832

103A ->104A 0.62510  
102B ->104B 0.32832  
103B ->104B 0.62510

Excited State 4: 3.000-A 1.5968 eV 776.46 nm f=0.0000 <S\*\*2>=2.000

101A ->104A 0.69704  
101B ->104B -0.69704

Excited State 5: 1.000-A 1.8647 eV 664.90 nm f=0.0139 <S\*\*2>=0.000

101A ->104A 0.69159  
101B ->104B 0.69159

Excited State 6: 3.000-A 2.0063 eV 617.99 nm f=0.0000 <S\*\*2>=2.000

100A ->104A 0.70422  
100B ->104B -0.70422

Excited State 7: 1.000-A 2.0079 eV 617.49 nm f=0.3537 <S\*\*2>=0.000

100A ->104A 0.30428  
102A ->104A 0.55896  
103A ->104A -0.28593  
100B ->104B 0.30428  
102B ->104B 0.55896  
103B ->104B -0.28593

Excited State 8: 1.000-A 2.0272 eV 611.60 nm f=0.0967 <S\*\*2>=0.000

100A ->104A 0.63639  
102A ->104A -0.26171  
103A ->104A 0.14339  
100B ->104B 0.63639  
102B ->104B -0.26171  
103B ->104B 0.14339

Excited State 9: 3.000-A 2.2213 eV 558.15 nm f=0.0000 <S\*\*2>=2.000

98A ->104A 0.38040  
99A ->104A 0.58954  
98B ->104B -0.38040  
99B ->104B -0.58954

Excited State 10: 1.000-A 2.3256 eV 533.12 nm f=0.0118 <S\*\*2>=0.000



|                           |                                           |
|---------------------------|-------------------------------------------|
| 99A ->104A                | 0.70198                                   |
| 99B ->104B                | 0.70198                                   |
| Excited State 11: 3.000-A | 2.3821 eV 520.48 nm f=0.0000 <S**2>=2.000 |
| 97A ->104A                | 0.12845                                   |
| 98A ->104A                | 0.57430                                   |
| 99A ->104A                | -0.37367                                  |
| 97B ->104B                | -0.12845                                  |
| 98B ->104B                | -0.57430                                  |
| 99B ->104B                | 0.37367                                   |
| Excited State 12: 3.000-A | 2.6456 eV 468.64 nm f=0.0000 <S**2>=2.000 |
| 97A ->104A                | 0.59661                                   |
| 98A ->104A                | -0.10869                                  |
| 103A ->105A               | -0.31118                                  |
| 97B ->104B                | -0.59661                                  |
| 98B ->104B                | 0.10869                                   |
| 103B ->105B               | 0.31118                                   |
| Excited State 13: 1.000-A | 2.8897 eV 429.05 nm f=0.0058 <S**2>=0.000 |
| 98A ->104A                | 0.68828                                   |
| 98B ->104B                | 0.68828                                   |
| Excited State 14: 3.000-A | 2.9860 eV 415.22 nm f=0.0000 <S**2>=2.000 |
| 97A ->104A                | -0.32976                                  |
| 102A ->105A               | 0.15332                                   |
| 103A ->105A               | -0.57649                                  |
| 97B ->104B                | 0.32976                                   |
| 102B ->105B               | -0.15332                                  |
| 103B ->105B               | 0.57649                                   |
| Excited State 15: 1.000-A | 3.2014 eV 387.28 nm f=0.0187 <S**2>=0.000 |
| 97A ->104A                | 0.69400                                   |
| 97B ->104B                | 0.69400                                   |
| Excited State 16: 3.000-A | 3.3208 eV 373.36 nm f=0.0000 <S**2>=2.000 |
| 94A ->104A                | 0.12029                                   |
| 96A ->104A                | -0.26529                                  |
| 101A ->105A               | 0.33701                                   |

102A ->105A 0.49653  
94B ->104B -0.12029  
96B ->104B 0.26529  
101B ->105B -0.33701  
102B ->105B -0.49653

Excited State 17: 3.000-A 3.4170 eV 362.85 nm f=0.0000 <S\*\*2>=2.000

96A ->104A 0.36909  
101A ->105A -0.34843  
102A ->105A 0.40432  
103A ->105A 0.14517  
103A ->106A -0.13475  
96B ->104B -0.36909  
101B ->105B 0.34843  
102B ->105B -0.40432  
103B ->105B -0.14517  
103B ->106B 0.13475

Excited State 18: 3.000-A 3.6965 eV 335.41 nm f=0.0000 <S\*\*2>=2.000

96A ->104A 0.47843  
101A ->105A 0.37309  
101A ->110A 0.11984  
103A ->106A 0.19967  
96B ->104B -0.47843  
101B ->105B -0.37309  
101B ->110B -0.11984  
103B ->106B -0.19967

Excited State 19: 1.000-A 3.7020 eV 334.91 nm f=0.1347 <S\*\*2>=0.000

103A ->105A 0.68477  
103B ->105B 0.68477

Excited State 20: 3.000-A 3.7996 eV 326.31 nm f=0.0000 <S\*\*2>=2.000

99A ->108A -0.37806  
99A ->111A 0.20363  
100A ->106A -0.14739  
100A ->107A 0.33348

100A ->109A -0.33884  
100A ->110A 0.13721  
99B ->108B 0.37806  
99B ->111B -0.20363  
100B ->106B 0.14739  
100B ->107B -0.33348  
100B ->109B 0.33884  
100B ->110B -0.13721

Excited State 21: 3.000-A 3.8564 eV 321.50 nm f=0.0000 <S\*\*2>=2.000

96A ->104A -0.19288  
98A ->105A 0.25524  
99A ->105A 0.12394  
101A ->105A -0.24915  
101A ->110A 0.23358  
102A ->106A -0.22335  
102A ->108A -0.10596  
103A ->106A 0.22514  
103A ->108A -0.13484  
103A ->111A -0.18839  
96B ->104B 0.19288  
98B ->105B -0.25524  
99B ->105B -0.12394  
101B ->105B 0.24915  
101B ->110B -0.23358  
102B ->106B 0.22335  
102B ->108B 0.10596  
103B ->106B -0.22514  
103B ->108B 0.13484  
103B ->111B 0.18839

Excited State 22: 1.000-A 3.8867 eV 319.00 nm f=0.0059 <S\*\*2>=0.000

96A ->104A 0.62674  
101A ->105A 0.30119  
96B ->104B 0.62674

|                   |          |           |           |          |              |
|-------------------|----------|-----------|-----------|----------|--------------|
| 101B ->105B       | 0.30119  |           |           |          |              |
| Excited State 23: | 3.000-A  | 3.9493 eV | 313.94 nm | f=0.0000 | <S**2>=2.000 |
| 87A ->104A        | -0.11343 |           |           |          |              |
| 92A ->104A        | 0.11143  |           |           |          |              |
| 94A ->104A        | 0.58277  |           |           |          |              |
| 101A ->111A       | -0.12130 |           |           |          |              |
| 103A ->105A       | -0.11306 |           |           |          |              |
| 103A ->110A       | 0.17074  |           |           |          |              |
| 87B ->104B        | 0.11343  |           |           |          |              |
| 92B ->104B        | -0.11143 |           |           |          |              |
| 94B ->104B        | -0.58277 |           |           |          |              |
| 101B ->111B       | 0.12130  |           |           |          |              |
| 103B ->105B       | 0.11306  |           |           |          |              |
| 103B ->110B       | -0.17074 |           |           |          |              |
| Excited State 24: | 1.000-A  | 3.9824 eV | 311.33 nm | f=0.7041 | <S**2>=0.000 |
| 102A ->105A       | 0.69321  |           |           |          |              |
| 102B ->105B       | 0.69321  |           |           |          |              |
| Excited State 25: | 3.000-A  | 4.0407 eV | 306.84 nm | f=0.0000 | <S**2>=2.000 |
| 87A ->104A        | -0.10792 |           |           |          |              |
| 94A ->104A        | 0.19765  |           |           |          |              |
| 97A ->105A        | 0.21944  |           |           |          |              |
| 97A ->110A        | 0.11777  |           |           |          |              |
| 98A ->106A        | -0.11490 |           |           |          |              |
| 101A ->106A       | -0.16090 |           |           |          |              |
| 101A ->108A       | 0.18005  |           |           |          |              |
| 101A ->111A       | 0.24431  |           |           |          |              |
| 102A ->105A       | -0.10695 |           |           |          |              |
| 102A ->110A       | -0.15236 |           |           |          |              |
| 102A ->113A       | -0.11924 |           |           |          |              |
| 103A ->109A       | -0.12531 |           |           |          |              |
| 103A ->110A       | -0.30530 |           |           |          |              |
| 103A ->113A       | 0.15099  |           |           |          |              |
| 87B ->104B        | 0.10792  |           |           |          |              |

|                           |                                           |
|---------------------------|-------------------------------------------|
| 94B ->104B                | -0.19765                                  |
| 97B ->105B                | -0.21944                                  |
| 97B ->110B                | -0.11777                                  |
| 98B ->106B                | 0.11490                                   |
| 101B ->106B               | 0.16090                                   |
| 101B ->108B               | -0.18005                                  |
| 101B ->111B               | -0.24431                                  |
| 102B ->105B               | 0.10695                                   |
| 102B ->110B               | 0.15236                                   |
| 102B ->113B               | 0.11924                                   |
| 103B ->109B               | 0.12531                                   |
| 103B ->110B               | 0.30530                                   |
| 103B ->113B               | -0.15099                                  |
| Excited State 26: 1.000-A | 4.1324 eV 300.03 nm f=0.0199 <S**2>=0.000 |
| 96A ->104A                | -0.28534                                  |
| 101A ->105A               | 0.61671                                   |
| 96B ->104B                | -0.28534                                  |
| 101B ->105B               | 0.61671                                   |
| Excited State 27: 3.000-A | 4.1485 eV 298.87 nm f=0.0000 <S**2>=2.000 |
| 100A ->105A               | 0.69941                                   |
| 100B ->105B               | -0.69941                                  |
| Excited State 28: 1.000-A | 4.1690 eV 297.39 nm f=0.0004 <S**2>=0.000 |
| 100A ->105A               | 0.70087                                   |
| 100B ->105B               | 0.70087                                   |
| Excited State 29: 3.000-A | 4.3032 eV 288.12 nm f=0.0000 <S**2>=2.000 |
| 95A ->104A                | 0.69116                                   |
| 95B ->104B                | -0.69116                                  |
| Excited State 30: 1.000-A | 4.3459 eV 285.29 nm f=0.0000 <S**2>=0.000 |
| 95A ->104A                | 0.69586                                   |
| 95B ->104B                | 0.69586                                   |
| Excited State 31: 3.000-A | 4.3559 eV 284.63 nm f=0.0000 <S**2>=2.000 |
| 87A ->104A                | -0.10159                                  |
| 98A ->105A                | 0.29088                                   |

|                           |                                           |
|---------------------------|-------------------------------------------|
| 99A ->105A                | 0.39326                                   |
| 101A ->110A               | -0.22288                                  |
| 102A ->106A               | -0.12284                                  |
| 102A ->111A               | 0.10283                                   |
| 103A ->106A               | 0.10391                                   |
| 103A ->108A               | 0.22466                                   |
| 103A ->111A               | 0.19521                                   |
| 87B ->104B                | 0.10159                                   |
| 98B ->105B                | -0.29088                                  |
| 99B ->105B                | -0.39326                                  |
| 101B ->110B               | 0.22288                                   |
| 102B ->106B               | 0.12284                                   |
| 102B ->111B               | -0.10283                                  |
| 103B ->106B               | -0.10391                                  |
| 103B ->108B               | -0.22466                                  |
| 103B ->111B               | -0.19521                                  |
| Excited State 32: 3.000-A | 4.4236 eV 280.28 nm f=0.0000 <S**2>=2.000 |
| 93A ->104A                | 0.69354                                   |
| 93B ->104B                | -0.69354                                  |
| Excited State 33: 3.000-A | 4.4489 eV 278.69 nm f=0.0000 <S**2>=2.000 |
| 98A ->105A                | -0.21699                                  |
| 99A ->105A                | 0.53220                                   |
| 101A ->110A               | 0.12074                                   |
| 102A ->106A               | 0.16637                                   |
| 103A ->106A               | -0.18455                                  |
| 103A ->108A               | -0.11838                                  |
| 103A ->111A               | -0.11519                                  |
| 98B ->105B                | 0.21699                                   |
| 99B ->105B                | -0.53220                                  |
| 101B ->110B               | -0.12074                                  |
| 102B ->106B               | -0.16637                                  |
| 103B ->106B               | 0.18455                                   |
| 103B ->108B               | 0.11838                                   |

|                           |                                           |
|---------------------------|-------------------------------------------|
| 103B ->111B               | 0.11519                                   |
| Excited State 34: 1.000-A | 4.4530 eV 278.43 nm f=0.0167 <S**2>=0.000 |
| 99A ->105A                | 0.70382                                   |
| 99B ->105B                | 0.70382                                   |
| Excited State 35: 1.000-A | 4.4741 eV 277.11 nm f=0.0005 <S**2>=0.000 |
| 93A ->104A                | 0.69777                                   |
| 93B ->104B                | 0.69777                                   |
| Excited State 36: 3.000-A | 4.5579 eV 272.02 nm f=0.0000 <S**2>=2.000 |
| 83A ->104A                | -0.11617                                  |
| 86A ->104A                | -0.14292                                  |
| 87A ->104A                | 0.24137                                   |
| 92A ->104A                | 0.32684                                   |
| 97A ->105A                | -0.26687                                  |
| 98A ->105A                | -0.12958                                  |
| 101A ->105A               | -0.11347                                  |
| 101A ->106A               | 0.16790                                   |
| 101A ->108A               | 0.12540                                   |
| 101A ->111A               | 0.11787                                   |
| 102A ->105A               | -0.12995                                  |
| 102A ->110A               | -0.14216                                  |
| 103A ->106A               | 0.19009                                   |
| 83B ->104B                | 0.11617                                   |
| 86B ->104B                | 0.14292                                   |
| 87B ->104B                | -0.24137                                  |
| 92B ->104B                | -0.32684                                  |
| 97B ->105B                | 0.26687                                   |
| 98B ->105B                | 0.12958                                   |
| 101B ->105B               | 0.11347                                   |
| 101B ->106B               | -0.16790                                  |
| 101B ->108B               | -0.12540                                  |
| 101B ->111B               | -0.11787                                  |
| 102B ->105B               | 0.12995                                   |

102B ->110B 0.14216

103B ->106B -0.19009

Excited State 37: 3.000-A 4.5766 eV 270.91 nm f=0.0000 <S\*\*2>=2.000

88A ->104A -0.14037

89A ->104A 0.25374

90A ->104A 0.22344

99A ->107A -0.10413

99A ->109A 0.11671

100A ->108A 0.17710

103A ->106A 0.21276

103A ->107A -0.43290

103A ->109A -0.11271

88B ->104B 0.14037

89B ->104B -0.25374

90B ->104B -0.22344

99B ->107B 0.10413

99B ->109B -0.11671

100B ->108B -0.17710

103B ->106B -0.21276

103B ->107B 0.43290

103B ->109B 0.11271

Excited State 38: 3.000-A 4.5922 eV 269.99 nm f=0.0000 <S\*\*2>=2.000

82A ->104A -0.10991

88A ->104A -0.20663

89A ->104A 0.38426

90A ->104A 0.36018

100A ->108A -0.18558

103A ->107A 0.24326

82B ->104B 0.10991

88B ->104B 0.20663

89B ->104B -0.38426

90B ->104B -0.36018

100B ->108B 0.18558



103B ->107B    -0.24326  
 Excited State 39: 1.000-A    4.5974 eV 269.68 nm f=0.0206 <S\*\*2>=0.000  
   94A ->104A    0.68367  
   94B ->104B    0.68367  
 Excited State 40: 3.000-A    4.6132 eV 268.76 nm f=0.0000 <S\*\*2>=2.000  
   98A ->105A    0.11891  
   99A ->108A    -0.40110  
   99A ->111A    0.19025  
  100A ->106A    0.13843  
  100A ->107A    -0.29278  
  100A ->109A    0.26250  
  100A ->110A    -0.10360  
  103A ->106A    -0.12590  
  103A ->108A    -0.16326  
   98B ->105B    -0.11891  
   99B ->108B    0.40110  
   99B ->111B    -0.19025  
  100B ->106B    -0.13843  
  100B ->107B    0.29278  
  100B ->109B    -0.26250  
  100B ->110B    0.10360  
  103B ->106B    0.12590  
  103B ->108B    0.16326  
 Excited State 41: 3.000-A    4.6371 eV 267.38 nm f=0.0000 <S\*\*2>=2.000  
   92A ->104A    0.42281  
   98A ->105A    0.20782  
  100A ->108A    0.18848  
  101A ->105A    0.13092  
  102A ->106A    -0.10020  
  103A ->106A    -0.34565  
   92B ->104B    -0.42281  
   98B ->105B    -0.20782  
  100B ->108B    -0.18848

101B ->105B -0.13092  
102B ->106B 0.10020  
103B ->106B 0.34565

Excited State 42: 3.000-A 4.6437 eV 267.00 nm f=0.0000 <S\*\*2>=2.000

92A ->104A 0.21778  
99A ->107A 0.16199  
99A ->109A -0.12587  
100A ->108A -0.43517  
100A ->111A 0.19206  
103A ->107A -0.28813  
103A ->109A -0.15661  
92B ->104B -0.21778  
99B ->107B -0.16199  
99B ->109B 0.12587  
100B ->108B 0.43517  
100B ->111B -0.19206  
103B ->107B 0.28813  
103B ->109B 0.15661

Excited State 43: 3.000-A 4.6709 eV 265.44 nm f=0.0000 <S\*\*2>=2.000

92A ->104A 0.27731  
97A ->105A 0.26016  
98A ->105A -0.23541  
99A ->105A 0.11986  
99A ->108A -0.13311  
101A ->106A -0.15537  
102A ->110A 0.15216  
103A ->106A 0.22810  
103A ->107A 0.19981  
103A ->113A 0.11695  
92B ->104B -0.27731  
97B ->105B -0.26016  
98B ->105B 0.23541

|                           |                                           |
|---------------------------|-------------------------------------------|
| 99B ->105B                | -0.11986                                  |
| 99B ->108B                | 0.13311                                   |
| 101B ->106B               | 0.15537                                   |
| 102B ->110B               | -0.15216                                  |
| 103B ->106B               | -0.22810                                  |
| 103B ->107B               | -0.19981                                  |
| 103B ->113B               | -0.11695                                  |
| Excited State 44: 1.000-A | 4.6942 eV 264.12 nm f=0.0090 <S**2>=0.000 |
| 92A ->104A                | 0.70057                                   |
| 92B ->104B                | 0.70057                                   |
| Excited State 45: 1.000-A | 4.7551 eV 260.74 nm f=0.0001 <S**2>=0.000 |
| 103A ->106A               | -0.29155                                  |
| 103A ->107A               | 0.60220                                   |
| 103A ->109A               | 0.15509                                   |
| 103B ->106B               | -0.29155                                  |
| 103B ->107B               | 0.60220                                   |
| 103B ->109B               | 0.15509                                   |
| Excited State 46: 3.000-A | 4.8080 eV 257.87 nm f=0.0000 <S**2>=2.000 |
| 89A ->104A                | -0.18868                                  |
| 90A ->104A                | 0.24852                                   |
| 91A ->104A                | 0.59713                                   |
| 89B ->104B                | 0.18868                                   |
| 90B ->104B                | -0.24852                                  |
| 91B ->104B                | -0.59713                                  |
| Excited State 47: 3.000-A | 4.8103 eV 257.75 nm f=0.0000 <S**2>=2.000 |
| 91A ->104A                | -0.14628                                  |
| 92A ->104A                | -0.10447                                  |
| 96A ->105A                | 0.10094                                   |
| 98A ->105A                | -0.28720                                  |
| 101A ->113A               | 0.11264                                   |
| 102A ->106A               | -0.37551                                  |
| 102A ->107A               | -0.14171                                  |
| 102A ->108A               | -0.21205                                  |

102A ->111A -0.13168  
103A ->108A 0.16860  
103A ->111A 0.12123  
91B ->104B 0.14628  
92B ->104B 0.10447  
96B ->105B -0.10094  
98B ->105B 0.28720  
101B ->113B -0.11264  
102B ->106B 0.37551  
102B ->107B 0.14171  
102B ->108B 0.21205  
102B ->111B 0.13168  
103B ->108B -0.16860  
103B ->111B -0.12123

Excited State 48: 1.000-A 4.8214 eV 257.16 nm f=0.0008 <S\*\*2>=0.000

88A ->104A -0.10754  
89A ->104A 0.23592  
90A ->104A 0.62956  
91A ->104A 0.17190  
88B ->104B -0.10754  
89B ->104B 0.23592  
90B ->104B 0.62956  
91B ->104B 0.17190

Excited State 49: 3.000-A 4.8469 eV 255.80 nm f=0.0000 <S\*\*2>=2.000

83A ->104A -0.19378  
86A ->104A -0.17442  
87A ->104A 0.45187  
92A ->104A -0.19801  
94A ->104A 0.14854  
97A ->105A 0.12424  
98A ->105A 0.14389  
101A ->106A -0.14908  
102A ->110A 0.13707

|             |          |
|-------------|----------|
| 83B ->104B  | 0.19378  |
| 86B ->104B  | 0.17442  |
| 87B ->104B  | -0.45187 |
| 92B ->104B  | 0.19801  |
| 94B ->104B  | -0.14854 |
| 97B ->105B  | -0.12424 |
| 98B ->105B  | -0.14389 |
| 101B ->106B | 0.14908  |
| 102B ->110B | -0.13707 |

Excited State 50: 3.000-A 4.8544 eV 255.40 nm f=0.0000 <S\*\*2>=2.000

|            |          |
|------------|----------|
| 88A ->104A | 0.10027  |
| 89A ->104A | -0.36048 |
| 90A ->104A | 0.47730  |
| 91A ->104A | -0.31727 |
| 88B ->104B | -0.10027 |
| 89B ->104B | 0.36048  |
| 90B ->104B | -0.47730 |
| 91B ->104B | 0.31727  |

SavETr: write IOETrn= 770 NScale= 10 NData= 16 NLR=1 LETran= 910.

Leave Link 914 at Wed Oct 10 01:35:48 2018, MaxMem= 1879048192 cpu: 199672.8

(Enter /software/gaussian/g09/ivybridge\_xe2015/g09/l601.exe)

Copying SCF densities to generalized density rwf, IOpCI= 1 IROHF=0.

## 6.10 Computed zyx-coordinates of the S<sub>0</sub> state of compound 7<sup>2+</sup> and excitation energies (uB3LYP/6-311++G\*\*, IEFPCM CH<sub>2</sub>Cl<sub>2</sub>)

Charge = 2 Multiplicity = 1

|   |          |          |          |
|---|----------|----------|----------|
| C | -1.33375 | -1.44213 | -0.00006 |
| C | -1.18959 | -0.02803 | -0.00005 |
| N | 0.00000  | 0.61855  | -0.00004 |
| C | 1.18959  | -0.02803 | -0.00005 |
| C | 1.33375  | -1.44213 | -0.00006 |
| S | 0.00000  | -2.5084  | -0.00011 |

|   |          |          |          |
|---|----------|----------|----------|
| C | 0.00000  | 2.08538  | 0.00002  |
| C | 0.00000  | 2.75205  | -1.22347 |
| C | 0.00000  | 4.14167  | -1.2208  |
| C | 0.00000  | 4.80285  | 0.00013  |
| C | 0.00000  | 4.14156  | 1.221    |
| C | 0.00000  | 2.75195  | 1.22357  |
| C | 3.56578  | -0.72656 | -0.00003 |
| C | 2.69951  | -1.84816 | -0.00004 |
| S | 2.69964  | 0.81796  | -0.00006 |
| C | 4.94475  | -0.87216 | 0.00000  |
| C | 5.46011  | -2.16779 | 0.00004  |
| C | 4.61917  | -3.29387 | 0.00005  |
| C | 3.24558  | -3.14786 | 0.00001  |
| C | -2.69951 | -1.84816 | -0.00004 |
| C | -3.56578 | -0.72656 | -0.00003 |
| S | -2.69964 | 0.81796  | -0.00006 |
| C | -3.24558 | -3.14786 | 0.00001  |
| C | -4.61917 | -3.29387 | 0.00005  |
| C | -5.46011 | -2.16779 | 0.00004  |
| C | -4.94475 | -0.87216 | 0.00000  |
| F | 0.00000  | 6.14827  | 0.00019  |
| H | 0.00000  | 2.20044  | -2.15515 |
| H | 0.00000  | 4.70407  | -2.14496 |
| H | 0.00000  | 4.7039   | 2.14521  |
| H | 0.00000  | 2.20026  | 2.1552   |
| H | 5.60478  | -0.01459 | 0.00000  |
| H | 6.5343   | -2.3055  | 0.00006  |
| H | 5.05405  | -4.28484 | 0.00008  |
| H | 2.60198  | -4.01865 | 0.00003  |
| H | -2.60198 | -4.01865 | 0.00003  |
| H | -5.05405 | -4.28484 | 0.00008  |
| H | -6.5343  | -2.3055  | 0.00006  |
| H | -5.60478 | -0.01459 | 0.00000  |

SCF Done: E(UB3LYP) = -2194.65117442 A.U. after 2 cycles

Sum of electronic and zero-point Energies= -2194.373813

Sum of electronic and thermal Energies= -2194.353774

Sum of electronic and thermal Enthalpies= -2194.352830

Sum of electronic and thermal Free Energies= -2194.423366

Excitation energies and oscillator strengths:

Excited State 1: 3.000-A" 0.9252 eV 1340.12 nm f=0.0000 <S\*\*2>=2.000

101A ->104A -0.11218

103A ->104A -0.70396

101B ->104B 0.11218

103B ->104B 0.70396

103A <-104A -0.12948

103B <-104B 0.12948

This state for optimization and/or second-order correction.

Total Energy, E(TD-HF/TD-KS) = -2194.61712387

Copying the excited state density for this state as the 1-particle RhoCl density.

Excited State 2: 3.000-A' 1.2988 eV 954.62 nm f=0.0000 <S\*\*2>=2.000

102A ->104A 0.69834

102B ->104B -0.69834

Excited State 3: 1.000-A' 1.5858 eV 781.86 nm f=0.0030 <S\*\*2>=0.000

102A ->104A 0.70629

102B ->104B 0.70629

Excited State 4: 1.000-A" 1.6606 eV 746.64 nm f=0.1629 <S\*\*2>=0.000

101A ->104A -0.28867

103A ->104A 0.64432

101B ->104B -0.28867

103B ->104B 0.64432

Excited State 5: 3.000-A" 1.7057 eV 726.90 nm f=0.0000 <S\*\*2>=2.000

99A ->104A 0.16822

101A ->104A 0.67492

103A ->104A -0.10816

99B ->104B -0.16822

101B ->104B    -0.67492  
 103B ->104B     0.10816  
 Excited State 6: 3.000-A'    1.9575 eV  633.39 nm  f=0.0000  <S\*\*2>=2.000  
   98A ->104A    -0.68804  
   102A ->104A   -0.10030  
   98B ->104B     0.68804  
   102B ->104B     0.10030  
 Excited State 7: 3.000-A"    2.0194 eV  613.95 nm  f=0.0000  <S\*\*2>=2.000  
   100A ->104A     0.70528  
   100B ->104B   -0.70528  
 Excited State 8: 1.000-A"    2.0315 eV  610.30 nm  f=0.0000  <S\*\*2>=0.000  
   100A ->104A     0.70551  
   100B ->104B     0.70551  
 Excited State 9: 1.000-A"    2.1396 eV  579.48 nm  f=0.3625  <S\*\*2>=0.000  
   101A ->104A     0.64144  
   103A ->104A     0.28417  
   101B ->104B     0.64144  
   103B ->104B     0.28417  
 Excited State 10: 3.000-A"    2.2996 eV  539.16 nm  f=0.0000  <S\*\*2>=2.000  
   99A ->104A     0.68467  
   101A ->104A   -0.17076  
   99B ->104B   -0.68467  
   101B ->104B     0.17076  
 Excited State 11: 1.000-A"    2.3497 eV  527.65 nm  f=0.0600  <S\*\*2>=0.000  
   99A ->104A     0.69924  
   99B ->104B     0.69924  
 Excited State 12: 1.000-A'    2.6536 eV  467.24 nm  f=0.0143  <S\*\*2>=0.000  
   98A ->104A     0.69890  
   98B ->104B     0.69890  
 Excited State 13: 3.000-A'    2.9666 eV  417.93 nm  f=0.0000  <S\*\*2>=2.000  
   96A ->104A     0.14882  
   98A ->104A     0.10898  
   103A ->105A   -0.64891



|                                                                      |          |
|----------------------------------------------------------------------|----------|
| 96B ->104B                                                           | -0.14882 |
| 98B ->104B                                                           | -0.10898 |
| 103B ->105B                                                          | 0.64891  |
| Excited State 14: 3.000-A" 3.0093 eV 412.00 nm f=0.0000 <S**2>=2.000 |          |
| 97A ->104A                                                           | 0.68133  |
| 97B ->104B                                                           | -0.68133 |
| Excited State 15: 3.000-A' 3.2638 eV 379.87 nm f=0.0000 <S**2>=2.000 |          |
| 96A ->104A                                                           | -0.63828 |
| 101A ->105A                                                          | -0.21946 |
| 102A ->107A                                                          | 0.11531  |
| 103A ->105A                                                          | -0.11786 |
| 96B ->104B                                                           | 0.63828  |
| 101B ->105B                                                          | 0.21946  |
| 102B ->107B                                                          | -0.11531 |
| 103B ->105B                                                          | 0.11786  |
| Excited State 16: 3.000-A" 3.3466 eV 370.47 nm f=0.0000 <S**2>=2.000 |          |
| 92A ->104A                                                           | 0.11492  |
| 101A ->107A                                                          | -0.10501 |
| 102A ->105A                                                          | 0.67248  |
| 92B ->104B                                                           | -0.11492 |
| 101B ->107B                                                          | 0.10501  |
| 102B ->105B                                                          | -0.67248 |
| Excited State 17: 1.000-A" 3.4919 eV 355.06 nm f=0.0003 <S**2>=0.000 |          |
| 97A ->104A                                                           | 0.69012  |
| 102A ->105A                                                          | 0.10479  |
| 97B ->104B                                                           | 0.69012  |
| 102B ->105B                                                          | 0.10479  |
| Excited State 18: 1.000-A' 3.7032 eV 334.80 nm f=0.0077 <S**2>=0.000 |          |
| 96A ->104A                                                           | 0.68031  |
| 101A ->105A                                                          | -0.15046 |
| 96B ->104B                                                           | 0.68031  |
| 101B ->105B                                                          | -0.15046 |

Excited State 19: 3.000-A' 3.7438 eV 331.17 nm f=0.0000 <S\*\*2>=2.000

|             |          |
|-------------|----------|
| 96A ->104A  | -0.22021 |
| 99A ->105A  | 0.14685  |
| 101A ->105A | 0.59770  |
| 102A ->107A | -0.13610 |
| 103A ->105A | -0.14139 |
| 96B ->104B  | 0.22021  |
| 99B ->105B  | -0.14685 |
| 101B ->105B | -0.59770 |
| 102B ->107B | 0.13610  |
| 103B ->105B | 0.14139  |

Excited State 20: 1.000-A' 3.7790 eV 328.09 nm f=0.1276 <S\*\*2>=0.000

|             |         |
|-------------|---------|
| 103A ->105A | 0.69289 |
| 103B ->105B | 0.69289 |

Excited State 21: 3.000-A' 3.8175 eV 324.78 nm f=0.0000 <S\*\*2>=2.000

|             |          |
|-------------|----------|
| 99A ->108A  | -0.33393 |
| 99A ->111A  | 0.19456  |
| 100A ->106A | -0.43165 |
| 100A ->112A | -0.27860 |
| 101A ->108A | 0.20970  |
| 101A ->111A | -0.10542 |
| 99B ->108B  | 0.33393  |
| 99B ->111B  | -0.19456 |
| 100B ->106B | 0.43165  |
| 100B ->112B | 0.27860  |
| 101B ->108B | -0.20970 |
| 101B ->111B | 0.10542  |

Excited State 22: 3.000-A" 3.8456 eV 322.41 nm f=0.0000 <S\*\*2>=2.000

|            |          |
|------------|----------|
| 97A ->104A | -0.10278 |
| 98A ->105A | -0.35320 |
| 98A ->111A | 0.13661  |
| 98A ->113A | -0.11272 |
| 99A ->110A | 0.11400  |

|                            |                                           |
|----------------------------|-------------------------------------------|
| 101A ->110A                | 0.19094                                   |
| 102A ->108A                | 0.19024                                   |
| 102A ->111A                | 0.23802                                   |
| 103A ->107A                | -0.30622                                  |
| 103A ->110A                | -0.23171                                  |
| 97B ->104B                 | 0.10278                                   |
| 98B ->105B                 | 0.35320                                   |
| 98B ->111B                 | -0.13661                                  |
| 98B ->113B                 | 0.11272                                   |
| 99B ->110B                 | -0.11400                                  |
| 101B ->110B                | -0.19094                                  |
| 102B ->108B                | -0.19024                                  |
| 102B ->111B                | -0.23802                                  |
| 103B ->107B                | 0.30622                                   |
| 103B ->110B                | 0.23171                                   |
| Excited State 23: 1.000-A" | 3.9130 eV 316.85 nm f=0.4904 <S**2>=0.000 |
| 102A ->105A                | 0.68891                                   |
| 102B ->105B                | 0.68891                                   |
| Excited State 24: 3.000-A' | 4.0507 eV 306.08 nm f=0.0000 <S**2>=2.000 |
| 97A ->105A                 | -0.14354                                  |
| 98A ->107A                 | 0.16037                                   |
| 98A ->110A                 | 0.13546                                   |
| 99A ->111A                 | 0.10374                                   |
| 101A ->108A                | 0.14319                                   |
| 101A ->111A                | 0.17739                                   |
| 102A ->110A                | 0.41147                                   |
| 103A ->108A                | -0.18497                                  |
| 103A ->111A                | -0.29947                                  |
| 103A ->113A                | 0.11064                                   |
| 97B ->105B                 | 0.14354                                   |
| 98B ->107B                 | -0.16037                                  |
| 98B ->110B                 | -0.13546                                  |
| 99B ->111B                 | -0.10374                                  |

|                                                                      |          |
|----------------------------------------------------------------------|----------|
| 101B ->108B                                                          | -0.14319 |
| 101B ->111B                                                          | -0.17739 |
| 102B ->110B                                                          | -0.41147 |
| 103B ->108B                                                          | 0.18497  |
| 103B ->111B                                                          | 0.29947  |
| 103B ->113B                                                          | -0.11064 |
| Excited State 25: 3.000-A" 4.1333 eV 299.96 nm f=0.0000 <S**2>=2.000 |          |
| 92A ->104A                                                           | 0.59698  |
| 98A ->105A                                                           | -0.13636 |
| 101A ->107A                                                          | -0.11217 |
| 102A ->105A                                                          | -0.11222 |
| 102A ->111A                                                          | -0.12622 |
| 103A ->107A                                                          | -0.13126 |
| 103A ->110A                                                          | 0.13848  |
| 92B ->104B                                                           | -0.59698 |
| 98B ->105B                                                           | 0.13636  |
| 101B ->107B                                                          | 0.11217  |
| 102B ->105B                                                          | 0.11222  |
| 102B ->111B                                                          | 0.12622  |
| 103B ->107B                                                          | 0.13126  |
| 103B ->110B                                                          | -0.13848 |
| Excited State 26: 3.000-A' 4.1700 eV 297.32 nm f=0.0000 <S**2>=2.000 |          |
| 100A ->105A                                                          | 0.70402  |
| 100B ->105B                                                          | -0.70402 |
| Excited State 27: 1.000-A' 4.1896 eV 295.93 nm f=0.0001 <S**2>=0.000 |          |
| 100A ->105A                                                          | 0.70539  |
| 100B ->105B                                                          | 0.70539  |
| Excited State 28: 3.000-A' 4.3287 eV 286.43 nm f=0.0000 <S**2>=2.000 |          |
| 83A ->104A                                                           | -0.16518 |
| 88A ->104A                                                           | -0.59110 |
| 94A ->104A                                                           | 0.18256  |
| 97A ->105A                                                           | -0.13856 |
| 103A ->113A                                                          | 0.11201  |

|                   |          |           |           |          |              |
|-------------------|----------|-----------|-----------|----------|--------------|
| 83B ->104B        | 0.16518  |           |           |          |              |
| 88B ->104B        | 0.59110  |           |           |          |              |
| 94B ->104B        | -0.18256 |           |           |          |              |
| 97B ->105B        | 0.13856  |           |           |          |              |
| 103B ->113B       | -0.11201 |           |           |          |              |
| Excited State 29: | 1.000-A' | 4.3292 eV | 286.39 nm | f=0.0311 | <S**2>=0.000 |
| 96A ->104A        | 0.11679  |           |           |          |              |
| 99A ->105A        | -0.20257 |           |           |          |              |
| 101A ->105A       | 0.65133  |           |           |          |              |
| 96B ->104B        | 0.11679  |           |           |          |              |
| 99B ->105B        | -0.20257 |           |           |          |              |
| 101B ->105B       | 0.65133  |           |           |          |              |
| Excited State 30: | 3.000-A" | 4.3395 eV | 285.71 nm | f=0.0000 | <S**2>=2.000 |
| 95A ->104A        | 0.70138  |           |           |          |              |
| 95B ->104B        | -0.70138 |           |           |          |              |
| Excited State 31: | 1.000-A" | 4.3838 eV | 282.82 nm | f=0.0000 | <S**2>=0.000 |
| 95A ->104A        | 0.70372  |           |           |          |              |
| 95B ->104B        | 0.70372  |           |           |          |              |
| Excited State 32: | 3.000-A' | 4.4308 eV | 279.82 nm | f=0.0000 | <S**2>=2.000 |
| 89A ->104A        | -0.10792 |           |           |          |              |
| 93A ->104A        | 0.69391  |           |           |          |              |
| 89B ->104B        | 0.10792  |           |           |          |              |
| 93B ->104B        | -0.69391 |           |           |          |              |
| Excited State 33: | 3.000-A" | 4.4385 eV | 279.34 nm | f=0.0000 | <S**2>=2.000 |
| 92A ->104A        | -0.23936 |           |           |          |              |
| 98A ->105A        | -0.52211 |           |           |          |              |
| 101A ->110A       | -0.18925 |           |           |          |              |
| 102A ->108A       | -0.19231 |           |           |          |              |
| 102A ->111A       | -0.19555 |           |           |          |              |
| 103A ->110A       | 0.13487  |           |           |          |              |
| 92B ->104B        | 0.23936  |           |           |          |              |
| 98B ->105B        | 0.52211  |           |           |          |              |
| 101B ->110B       | 0.18925  |           |           |          |              |

|                            |                                           |
|----------------------------|-------------------------------------------|
| 102B ->108B                | 0.19231                                   |
| 102B ->111B                | 0.19555                                   |
| 103B ->110B                | -0.13487                                  |
| Excited State 34: 3.000-A' | 4.4471 eV 278.80 nm f=0.0000 <S**2>=2.000 |
| 99A ->105A                 | 0.65467                                   |
| 101A ->105A                | -0.19679                                  |
| 99B ->105B                 | -0.65467                                  |
| 101B ->105B                | 0.19679                                   |
| Excited State 35: 1.000-A' | 4.4791 eV 276.81 nm f=0.0003 <S**2>=0.000 |
| 93A ->104A                 | 0.70330                                   |
| 93B ->104B                 | 0.70330                                   |
| Excited State 36: 3.000-A' | 4.4976 eV 275.67 nm f=0.0000 <S**2>=2.000 |
| 82A ->104A                 | 0.14030                                   |
| 89A ->104A                 | 0.56482                                   |
| 90A ->104A                 | -0.36796                                  |
| 93A ->104A                 | 0.11416                                   |
| 82B ->104B                 | -0.14030                                  |
| 89B ->104B                 | -0.56482                                  |
| 90B ->104B                 | 0.36796                                   |
| 93B ->104B                 | -0.11416                                  |
| Excited State 37: 1.000-A' | 4.5242 eV 274.05 nm f=0.0072 <S**2>=0.000 |
| 99A ->105A                 | 0.66848                                   |
| 101A ->105A                | 0.16664                                   |
| 99B ->105B                 | 0.66848                                   |
| 101B ->105B                | 0.16664                                   |
| Excited State 38: 1.000-A" | 4.5545 eV 272.22 nm f=0.2687 <S**2>=0.000 |
| 92A ->104A                 | 0.11691                                   |
| 98A ->105A                 | 0.69159                                   |
| 92B ->104B                 | 0.11691                                   |
| 98B ->105B                 | 0.69159                                   |
| Excited State 39: 3.000-A' | 4.6244 eV 268.11 nm f=0.0000 <S**2>=2.000 |
| 99A ->105A                 | 0.10763                                   |
| 99A ->108A                 | 0.38145                                   |

|                            |                                           |
|----------------------------|-------------------------------------------|
| 99A ->111A                 | -0.19558                                  |
| 100A ->106A                | -0.40069                                  |
| 100A ->112A                | -0.22050                                  |
| 101A ->108A                | -0.23632                                  |
| 101A ->111A                | 0.12982                                   |
| 99B ->105B                 | -0.10763                                  |
| 99B ->108B                 | -0.38145                                  |
| 99B ->111B                 | 0.19558                                   |
| 100B ->106B                | 0.40069                                   |
| 100B ->112B                | 0.22050                                   |
| 101B ->108B                | 0.23632                                   |
| 101B ->111B                | -0.12982                                  |
| Excited State 40: 3.000-A' | 4.6382 eV 267.31 nm f=0.0000 <S**2>=2.000 |
| 99A ->106A                 | -0.32609                                  |
| 99A ->112A                 | -0.18584                                  |
| 100A ->108A                | -0.42832                                  |
| 100A ->111A                | 0.21642                                   |
| 101A ->106A                | 0.23949                                   |
| 103A ->106A                | -0.20708                                  |
| 99B ->106B                 | 0.32609                                   |
| 99B ->112B                 | 0.18584                                   |
| 100B ->108B                | 0.42832                                   |
| 100B ->111B                | -0.21642                                  |
| 101B ->106B                | -0.23949                                  |
| 103B ->106B                | 0.20708                                   |
| Excited State 41: 1.000-A" | 4.6542 eV 266.39 nm f=0.0013 <S**2>=0.000 |
| 92A ->104A                 | 0.67728                                   |
| 98A ->105A                 | -0.11791                                  |
| 92B ->104B                 | 0.67728                                   |
| 98B ->105B                 | -0.11791                                  |
| Excited State 42: 3.000-A' | 4.6595 eV 266.09 nm f=0.0000 <S**2>=2.000 |
| 88A ->104A                 | 0.14780                                   |
| 94A ->104A                 | 0.66571                                   |

|                            |                                           |
|----------------------------|-------------------------------------------|
| 88B ->104B                 | -0.14780                                  |
| 94B ->104B                 | -0.66571                                  |
| Excited State 43: 1.000-A' | 4.6783 eV 265.02 nm f=0.0132 <S**2>=0.000 |
| 94A ->104A                 | 0.70098                                   |
| 94B ->104B                 | 0.70098                                   |
| Excited State 44: 3.000-A" | 4.7305 eV 262.10 nm f=0.0000 <S**2>=2.000 |
| 91A ->104A                 | 0.69604                                   |
| 91B ->104B                 | -0.69604                                  |
| Excited State 45: 3.000-A' | 4.7422 eV 261.45 nm f=0.0000 <S**2>=2.000 |
| 100A ->108A                | 0.23536                                   |
| 100A ->111A                | -0.11752                                  |
| 102A ->109A                | 0.34686                                   |
| 103A ->106A                | -0.47508                                  |
| 103A ->112A                | 0.21740                                   |
| 100B ->108B                | -0.23536                                  |
| 100B ->111B                | 0.11752                                   |
| 102B ->109B                | -0.34686                                  |
| 103B ->106B                | 0.47508                                   |
| 103B ->112B                | -0.21740                                  |
| Excited State 46: 3.000-A" | 4.7545 eV 260.77 nm f=0.0000 <S**2>=2.000 |
| 92A ->104A                 | -0.19500                                  |
| 96A ->105A                 | -0.12069                                  |
| 98A ->105A                 | 0.22692                                   |
| 98A ->113A                 | -0.12814                                  |
| 101A ->107A                | -0.12475                                  |
| 102A ->111A                | -0.12344                                  |
| 103A ->107A                | -0.53242                                  |
| 103A ->110A                | 0.18184                                   |
| 92B ->104B                 | 0.19500                                   |
| 96B ->105B                 | 0.12069                                   |
| 98B ->105B                 | -0.22692                                  |
| 98B ->113B                 | 0.12814                                   |
| 101B ->107B                | 0.12475                                   |



|                            |                                           |
|----------------------------|-------------------------------------------|
| 102B ->111B                | 0.12344                                   |
| 103B ->107B                | 0.53242                                   |
| 103B ->110B                | -0.18184                                  |
| Excited State 47: 3.000-A" | 4.7943 eV 258.61 nm f=0.0000 <S**2>=2.000 |
| 101A ->109A                | -0.13548                                  |
| 102A ->106A                | -0.44021                                  |
| 102A ->112A                | 0.20229                                   |
| 102A ->116A                | -0.10481                                  |
| 103A ->109A                | 0.45498                                   |
| 101B ->109B                | 0.13548                                   |
| 102B ->106B                | 0.44021                                   |
| 102B ->112B                | -0.20229                                  |
| 102B ->116B                | 0.10481                                   |
| 103B ->109B                | -0.45498                                  |
| Excited State 48: 1.000-A" | 4.8071 eV 257.92 nm f=0.0000 <S**2>=0.000 |
| 91A ->104A                 | 0.70236                                   |
| 91B ->104B                 | 0.70236                                   |
| Excited State 49: 1.000-A' | 4.8093 eV 257.80 nm f=0.0019 <S**2>=0.000 |
| 89A ->104A                 | 0.50528                                   |
| 90A ->104A                 | -0.48202                                  |
| 89B ->104B                 | 0.50528                                   |
| 90B ->104B                 | -0.48202                                  |
| Excited State 50: 3.000-A' | 4.8339 eV 256.49 nm f=0.0000 <S**2>=2.000 |
| 88A ->104A                 | 0.13762                                   |
| 97A ->105A                 | -0.19124                                  |
| 98A ->107A                 | 0.10010                                   |
| 98A ->110A                 | 0.16423                                   |
| 99A ->105A                 | 0.11063                                   |
| 101A ->108A                | -0.17100                                  |
| 101A ->111A                | -0.14901                                  |
| 101A ->113A                | -0.13778                                  |
| 102A ->107A                | 0.32011                                   |
| 102A ->110A                | -0.24696                                  |

|             |          |
|-------------|----------|
| 103A ->108A | -0.19378 |
| 103A ->111A | -0.26029 |
| 103A ->113A | 0.12197  |
| 88B ->104B  | -0.13762 |
| 97B ->105B  | 0.19124  |
| 98B ->107B  | -0.10010 |
| 98B ->110B  | -0.16423 |
| 99B ->105B  | -0.11063 |
| 101B ->108B | 0.17100  |
| 101B ->111B | 0.14901  |
| 101B ->113B | 0.13778  |
| 102B ->107B | -0.32011 |
| 102B ->110B | 0.24696  |
| 103B ->108B | 0.19378  |
| 103B ->111B | 0.26029  |
| 103B ->113B | -0.12197 |

SavETr: write IOETrn= 770 NScale= 10 NData= 16 NLR=1 LETran= 910.

Leave Link 914 at Wed Oct 10 00:19:30 2018, MaxMem= 1879048192 cpu: 174266.1

(Enter /software/gaussian/g09/ivybridge\_xe2015/g09/l601.exe)

Copying SCF densities to generalized density rwf, IOpCl= 1 IROHF=0.

### 6.11 Computed xyz-coordinates of the $T_0$ state of compound $5^{2+}$ (uB3LYP/6-311++G\*\*, IEFPCM $CH_2Cl_2$ )

|   |          |          |          |
|---|----------|----------|----------|
| C | 1.30653  | -2.16447 | 0.00003  |
| C | 1.22223  | -0.75299 | 0.00005  |
| N | -0.00012 | -0.08181 | -0.00000 |
| C | -1.22288 | -0.75230 | -0.00005 |
| C | -1.30790 | -2.16375 | -0.00003 |
| S | -0.00099 | -3.30401 | 0.00001  |
| C | -2.54429 | -0.15649 | -0.00007 |
| C | -3.55134 | -1.15309 | -0.00008 |
| S | -2.90394 | -2.78153 | -0.00006 |

|   |          |          |          |
|---|----------|----------|----------|
| S | 2.90227  | -2.78302 | 0.00006  |
| C | 3.55047  | -1.15490 | 0.00008  |
| C | 2.54389  | -0.15782 | 0.00007  |
| C | 0.00046  | 1.36975  | -0.00000 |
| C | 4.90429  | -0.87374 | 0.00009  |
| C | 5.30400  | 0.47456  | 0.00011  |
| C | 4.35060  | 1.48437  | 0.00011  |
| C | 2.98705  | 1.19008  | 0.00008  |
| C | -2.98690 | 1.19161  | -0.00009 |
| C | -4.35032 | 1.48650  | -0.00011 |
| C | -5.30417 | 0.47712  | -0.00012 |
| C | -4.90503 | -0.87135 | -0.00010 |
| C | 0.00104  | 2.04636  | -1.21742 |
| C | 0.00167  | 3.43834  | -1.21989 |
| C | 0.00173  | 4.10232  | 0.00000  |
| C | 0.00123  | 3.43833  | 1.21989  |
| C | 0.00061  | 2.04635  | 1.21742  |
| F | 0.00234  | 5.44893  | 0.00000  |
| H | 5.64106  | -1.66753 | 0.00010  |
| H | 6.35945  | 0.71506  | 0.00012  |
| H | 4.66048  | 2.52113  | 0.00012  |
| H | 2.29303  | 2.01090  | 0.00008  |
| H | -2.29258 | 2.01216  | -0.00008 |
| H | -4.65975 | 2.52340  | -0.00012 |
| H | -6.35952 | 0.71808  | -0.00013 |
| H | -5.64214 | -1.66482 | -0.00010 |
| H | 0.00098  | 1.49609  | -2.15002 |
| H | 0.00210  | 3.99999  | -2.14474 |
| H | 0.00133  | 3.99999  | 2.14474  |
| H | 0.00022  | 1.49609  | 2.15002  |

SCF Done: E(UB3LYP) = -2194.59906514 A.U. after 15 cycles

6.12 Computed xyz-coordinates of the  $T_0$  state of compound  $6^{2+}$  (uB3LYP/6-311++G\*\*, IEFPCM  $CH_2Cl_2$ )

|   |          |          |          |
|---|----------|----------|----------|
| C | -0.31111 | -2.23726 | 0.02703  |
| C | -0.94303 | -0.97787 | -0.01541 |
| N | -0.21331 | 0.19763  | -0.02709 |
| C | 1.16535  | 0.17677  | -0.02603 |
| C | 1.99365  | -0.95688 | -0.00254 |
| S | 1.39960  | -2.58597 | 0.04407  |
| S | -1.40026 | -3.55739 | 0.06098  |
| C | -2.77171 | -2.46684 | 0.00839  |
| C | -2.38696 | -1.10738 | -0.03749 |
| S | 2.05674  | 1.65418  | -0.04797 |
| C | 3.58157  | 0.77061  | -0.02877 |
| C | 3.38618  | -0.62619 | -0.00493 |
| C | -0.84779 | 1.50884  | 0.00101  |
| C | -1.08533 | 2.17462  | -1.20078 |
| C | -1.66926 | 3.43691  | -1.17016 |
| C | -1.99278 | 3.98711  | 0.06245  |
| C | -1.75607 | 3.33625  | 1.26579  |
| C | -1.17077 | 2.07509  | 1.23385  |
| F | -2.56107 | 5.20786  | 0.09250  |
| C | -4.09539 | -2.88064 | -0.00242 |
| C | -5.09580 | -1.89783 | -0.06808 |
| C | -4.75306 | -0.55341 | -0.12246 |
| C | -3.41468 | -0.14571 | -0.10743 |
| C | 4.84406  | 1.33984  | -0.03480 |
| C | 5.95526  | 0.47587  | -0.01585 |
| C | 5.78735  | -0.90507 | 0.00862  |
| C | 4.50935  | -1.47125 | 0.01454  |
| H | -0.82808 | 1.71539  | -2.14714 |
| H | -1.87215 | 3.98451  | -2.08108 |
| H | -2.02321 | 3.80865  | 2.20192  |

|   |          |          |          |
|---|----------|----------|----------|
| H | -0.97402 | 1.53969  | 2.15451  |
| H | -4.35485 | -3.93072 | 0.03565  |
| H | -6.13540 | -2.19910 | -0.07805 |
| H | -5.52776 | 0.20025  | -0.17740 |
| H | -3.19639 | 0.90787  | -0.15463 |
| H | 4.98118  | 2.41334  | -0.05292 |
| H | 6.95073  | 0.90098  | -0.02024 |
| H | 6.65412  | -1.55288 | 0.02321  |
| H | 4.39721  | -2.54873 | 0.03286  |

SCF Done: E(UB3LYP) = -2194.61073704 A.U. after 15 cycles

### 6.13 Computed xyz-coordinates of the $T_0$ state of compound $7^{2+}$ (uB3LYP/6-311++G\*\*, IEFPCM $CH_2Cl_2$ )

|   |          |          |          |
|---|----------|----------|----------|
| C | 1.43782  | 0.00001  | 1.33218  |
| C | 0.03412  | -0.00002 | 1.18912  |
| N | -0.64953 | -0.00001 | 0.00000  |
| C | 0.03412  | -0.00002 | -1.18912 |
| C | 1.43782  | 0.00001  | -1.33218 |
| S | 2.56963  | 0.00004  | 0.00000  |
| C | -2.10671 | 0.00003  | 0.00000  |
| C | -2.78142 | -1.22041 | 0.00000  |
| C | -4.17143 | -1.22041 | 0.00000  |
| C | -4.83286 | 0.00012  | 0.00000  |
| C | -4.17135 | 1.22061  | 0.00000  |
| C | -2.78133 | 1.22051  | 0.00000  |
| C | 0.72853  | -0.00006 | -3.56848 |
| C | 1.84102  | -0.00002 | -2.69482 |
| S | -0.80898 | 0.00003  | -2.69101 |
| C | 0.87659  | -0.00011 | -4.94008 |
| C | 2.18845  | -0.00012 | -5.46351 |
| C | 3.30101  | -0.00009 | -4.62449 |

|   |          |          |          |
|---|----------|----------|----------|
| C | 3.14468  | -0.00003 | -3.24148 |
| C | 1.84102  | -0.00002 | 2.69482  |
| C | 0.72853  | -0.00006 | 3.56848  |
| S | -0.80898 | 0.00003  | 2.69101  |
| C | 3.14468  | -0.00003 | 3.24148  |
| C | 3.30101  | -0.00009 | 4.62449  |
| C | 2.18845  | -0.00012 | 5.46351  |
| C | 0.87659  | -0.00011 | 4.94008  |
| F | -6.17994 | 0.00017  | 0.00000  |
| H | -2.23002 | -2.15228 | 0.00000  |
| H | -4.73414 | -2.14448 | 0.00000  |
| H | -4.73400 | 2.14472  | 0.00000  |
| H | -2.22987 | 2.15234  | 0.00000  |
| H | 0.02306  | -0.00012 | -5.60577 |
| H | 2.32125  | -0.00015 | -6.53791 |
| H | 4.29608  | -0.00010 | -5.04945 |
| H | 4.01525  | -0.00001 | -2.59698 |
| H | 4.01525  | -0.00001 | 2.59698  |
| H | 4.29608  | -0.00010 | 5.04945  |
| H | 2.32125  | -0.00015 | 6.53791  |
| H | 0.02306  | -0.00012 | 5.60577  |

SCF Done: E(UB3LYP) = -2194.61705627 A.U. after 15 cycles

#### 6.14 Mulliken atomic spin densities of 5<sup>•+</sup> (uB3LYP/6-311++G<sup>\*\*</sup>, IEFPCM CH<sub>2</sub>Cl<sub>2</sub>)

Mulliken atomic spin densities:

|     |          |
|-----|----------|
| 1 C | 0.034116 |
| 2 C | 0.069562 |
| 3 N | 0.283662 |
| 4 C | 0.069567 |
| 5 C | 0.034114 |

6 S 0.156276  
7 C -0.012690  
8 C 0.005288  
9 S 0.025008  
10 S 0.025005  
11 C 0.005295  
12 C -0.012690  
13 C -0.003245  
14 C 0.002103  
15 C 0.037536  
16 C -0.015198  
17 C 0.039591  
18 C 0.039593  
19 C -0.015197  
20 C 0.037531  
21 C 0.002101  
22 C 0.086726  
23 C -0.047243  
24 C 0.121236  
25 C -0.047240  
26 C 0.086729  
27 F 0.010815  
28 H 0.001198  
29 H -0.002070  
30 H 0.000915  
31 H -0.002527  
32 H -0.002526  
33 H 0.000915  
34 H -0.002070  
35 H 0.001198  
36 H -0.008826  
37 H 0.002134  
38 H 0.002134

39 H -0.008827

Sum of Mulliken atomic spin densities = 1.00000

### 6.15 Mulliken atomic spin densities of **6<sup>•+</sup>** (uB3LYP/6-311++G<sup>\*\*</sup>, IEFPCM CH<sub>2</sub>Cl<sub>2</sub>)

Mulliken atomic spin densities:

|      |           |
|------|-----------|
| 1 C  | 0.150921  |
| 2 C  | 0.082427  |
| 3 N  | 0.247827  |
| 4 C  | 0.030543  |
| 5 C  | 0.157349  |
| 6 S  | 0.228764  |
| 7 S  | 0.008137  |
| 8 C  | 0.025136  |
| 9 C  | -0.020341 |
| 10 S | -0.010633 |
| 11 C | 0.060423  |
| 12 C | -0.033954 |
| 13 C | -0.018894 |
| 14 C | 0.000641  |
| 15 C | 0.001570  |
| 16 C | 0.000326  |
| 17 C | 0.001783  |
| 18 C | -0.002262 |
| 19 F | 0.000042  |
| 20 C | -0.013849 |
| 21 C | 0.039604  |
| 22 C | -0.017896 |
| 23 C | 0.034924  |
| 24 C | -0.037096 |
| 25 C | 0.077545  |
| 26 C | -0.035109 |



27 C 0.054926  
28 H -0.000349  
29 H 0.000492  
30 H 0.000559  
31 H -0.000609  
32 H 0.000786  
33 H -0.002343  
34 H 0.000880  
35 H -0.001884  
36 H 0.001864  
37 H -0.004725  
38 H 0.001871  
39 H -0.009395

Sum of Mulliken atomic spin densities = 1.00000

### 6.16 Mulliken atomic spin densities of 7<sup>•+</sup> (uB3LYP/6-311++G<sup>\*\*</sup>, IEFPCM CH<sub>2</sub>Cl<sub>2</sub>)

Mulliken atomic spin densities:

1 C 0.165965  
2 C 0.037944  
3 N 0.228154  
4 C 0.037944  
5 C 0.165965  
6 S 0.253630  
7 C -0.023247  
8 C 0.005209  
9 C 0.003908  
10 C -0.002387  
11 C 0.003889  
12 C 0.004982  
13 C 0.053097  
14 C -0.035946

15 S -0.009930  
16 C -0.034757  
17 C 0.071139  
18 C -0.031985  
19 C 0.056118  
20 C -0.035946  
21 C 0.053097  
22 S -0.009930  
23 C 0.056118  
24 C -0.031985  
25 C 0.071139  
26 C -0.034757  
27 H -0.000340  
28 H 0.000606  
29 H 0.000609  
30 H -0.000346  
31 H 0.001721  
32 H -0.004442  
33 H 0.001770  
34 H -0.008048  
35 H -0.008048  
36 H 0.001770  
37 H -0.004442  
38 H 0.001721  
39 F 0.000038

Sum of Mulliken atomic spin densities = 1.00000

## 6.17 Wiberg bond orders - overview

The calculated Wiberg bond orders (BO) were employed to estimate the delocalization of the spin density of the radical cations using the extracting by multiwfn.<sup>[8]</sup>

Table 4: Wiberg bond orders (BO) from parent BBTTs **5**, **6**, and **7**, and radical cations **5<sup>+</sup>**, **6<sup>+</sup>**, and **7<sup>+</sup>** as well as the relative change of BO given as  $\Delta(\text{BO}_{x^{+}} - \text{BO}_{x^{2+}})$  in the BBTT-core ((u)B3LYP/6-311G<sup>\*\*</sup>).<sup>[8]</sup>

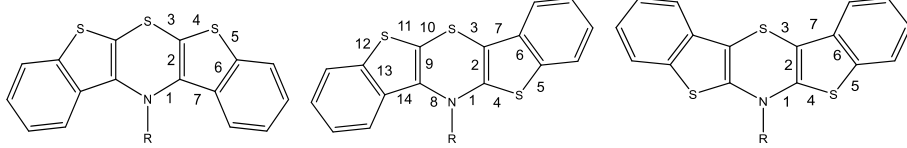

| compound         |                                                                 | <b>1 (8)</b>     | <b>2 (9)</b>       | <b>3 (10)</b>    | <b>4 (11)</b>    | <b>5 (12)</b>    | <b>6 (13)</b>    | <b>7 (14)</b>    |
|------------------|-----------------------------------------------------------------|------------------|--------------------|------------------|------------------|------------------|------------------|------------------|
| <i>syn-syn</i>   | <b>BO<sub>5</sub></b>                                           | 1.099            | 1.581              | 1.256            | 1.304            | 1.271            | 1.295            | 1.132            |
|                  | <b>BO<sub>5<sup>+</sup></sub></b>                               | 1.232            | 1.42               | 1.353            | 1.349            | 1.259            | 1.296            | 1.111            |
|                  | <b><math>\Delta(\text{BO}_5 - \text{BO}_{5^{+}})</math> [%]</b> | 12.14            | -10.18             | 7.65             | 3.52             | -0.94            | 0.07             | -1.80            |
| <i>syn-anti</i>  | <b>BO<sub>6</sub></b>                                           | 1.186<br>(1.112) | 1.582<br>(1.583)   | 1.186<br>(1.255) | 1.232<br>(1.296) | 1.267<br>(1.270) | 1.293<br>(1.298) | 1.172<br>(1.124) |
|                  | <b>BO<sub>6<sup>+</sup></sub></b>                               | 1.294<br>(1.218) | 1.407<br>(1.420)   | 1.301<br>(1.353) | 1.263<br>(1.346) | 1.233<br>(1.260) | 1.287<br>(1.294) | 1.187<br>(1.123) |
|                  | <b><math>\Delta(\text{BO}_6 - \text{BO}_{6^{+}})</math> [%]</b> | 9.08<br>(9.61)   | -11.02<br>(-10.26) | 9.72<br>(7.75)   | 2.56<br>(3.91)   | -2.67<br>(-0.83) | -0.42<br>(-0.36) | 1.28<br>(-0.09)  |
| <i>anti-anti</i> | <b>BO<sub>7</sub></b>                                           | 1.193            | 1.564              | 1.184            | 1.231            | 1.253            | 1.289            | 1.179            |
|                  | <b>BO<sub>7<sup>+</sup></sub></b>                               | 1.265            | 1.438              | 1.285            | 1.275            | 1.209            | 1.293            | 1.193            |
|                  | <b><math>\Delta(\text{BO}_7 - \text{BO}_{7^{+}})</math> [%]</b> | 6.03             | -8.09              | 8.52             | 3.57             | -3.52            | 0.37             | 1.17             |

## 6.18 Wiberg bond orders extracted of **5** extracted by multiwfn (B3LYP/6-311++G<sup>\*\*</sup>, IEFPCM CH<sub>2</sub>Cl<sub>2</sub>)

Bond orders with absolute value  $\geq 0.050000$

```
# 1: 1(C) 2(C) 1.58094889
# 2: 1(C) 3(N) 0.12303733
# 3: 1(C) 4(C) 0.05645994
# 4: 1(C) 5(C) 0.09415285
# 5: 1(C) 6(S) 1.25647173
```

# 6: 1(C ) 10(S ) 1.30358701  
# 7: 1(C ) 11(C ) 0.14495509  
# 8: 1(C ) 12(C ) 0.14335953  
# 9: 2(C ) 3(N ) 1.09873732  
# 10: 2(C ) 4(C ) 0.10627940  
# 11: 2(C ) 5(C ) 0.05645992  
# 12: 2(C ) 6(S ) 0.15554023  
# 13: 2(C ) 10(S ) 0.20351658  
# 14: 2(C ) 11(C ) 0.13225960  
# 15: 2(C ) 12(C ) 1.13169165  
# 16: 2(C ) 13(C ) 0.09484785  
# 17: 2(C ) 17(C ) 0.10417185  
# 18: 3(N ) 4(C ) 1.09873717  
# 19: 3(N ) 5(C ) 0.12303740  
# 20: 3(N ) 7(C ) 0.09683911  
# 21: 3(N ) 12(C ) 0.09683913  
# 22: 3(N ) 13(C ) 1.14616064  
# 23: 3(N ) 22(C ) 0.12939237  
# 24: 3(N ) 26(C ) 0.12939250  
# 25: 4(C ) 5(C ) 1.58094951  
# 26: 4(C ) 6(S ) 0.15554031  
# 27: 4(C ) 7(C ) 1.13169145  
# 28: 4(C ) 8(C ) 0.13225966  
# 29: 4(C ) 9(S ) 0.20351644  
# 30: 4(C ) 13(C ) 0.09484782  
# 31: 4(C ) 18(C ) 0.10417178  
# 32: 5(C ) 6(S ) 1.25647192  
# 33: 5(C ) 7(C ) 0.14335957  
# 34: 5(C ) 8(C ) 0.14495509  
# 35: 5(C ) 9(S ) 1.30358564  
# 36: 6(S ) 9(S ) 0.13477448  
# 37: 6(S ) 10(S ) 0.13477453  
# 38: 7(C ) 8(C ) 1.29541743

# 39: 7(C) 9(S) 0.15838788  
# 40: 7(C) 18(C) 1.32185935  
# 41: 7(C) 19(C) 0.13143948  
# 42: 7(C) 20(C) 0.10968708  
# 43: 7(C) 21(C) 0.11958582  
# 44: 7(C) 32(H) 0.07673876  
# 45: 8(C) 9(S) 1.27127252  
# 46: 8(C) 18(C) 0.11632330  
# 47: 8(C) 19(C) 0.11816576  
# 48: 8(C) 20(C) 0.13533442  
# 49: 8(C) 21(C) 1.41367486  
# 50: 8(C) 35(H) 0.08033328  
# 51: 9(S) 21(C) 0.13793566  
# 52: 10(S) 11(C) 1.27127191  
# 53: 10(S) 12(C) 0.15838769  
# 54: 10(S) 14(C) 0.13793567  
# 55: 11(C) 12(C) 1.29541612  
# 56: 11(C) 14(C) 1.41367633  
# 57: 11(C) 15(C) 0.13533443  
# 58: 11(C) 16(C) 0.11816575  
# 59: 11(C) 17(C) 0.11632327  
# 60: 11(C) 28(H) 0.08033340  
# 61: 12(C) 14(C) 0.11958582  
# 62: 12(C) 15(C) 0.10968718  
# 63: 12(C) 16(C) 0.13143952  
# 64: 12(C) 17(C) 1.32186022  
# 65: 12(C) 31(H) 0.07673878  
# 66: 13(C) 22(C) 1.34787579  
# 67: 13(C) 23(C) 0.12793651  
# 68: 13(C) 24(C) 0.11674106  
# 69: 13(C) 25(C) 0.12793665  
# 70: 13(C) 26(C) 1.34787717  
# 71: 13(C) 36(H) 0.07369752

# 72: 13(C ) 39(H ) 0.07369757  
# 73: 14(C ) 15(C ) 1.50060472  
# 74: 14(C ) 16(C ) 0.12746508  
# 75: 14(C ) 17(C ) 0.13332599  
# 76: 14(C ) 28(H ) 0.86876751  
# 77: 14(C ) 29(H ) 0.08376729  
# 78: 15(C ) 16(C ) 1.41765967  
# 79: 15(C ) 17(C ) 0.12876544  
# 80: 15(C ) 28(H ) 0.08206142  
# 81: 15(C ) 29(H ) 0.87780288  
# 82: 15(C ) 30(H ) 0.08130335  
# 83: 16(C ) 17(C ) 1.51736902  
# 84: 16(C ) 29(H ) 0.08109739  
# 85: 16(C ) 30(H ) 0.87668267  
# 86: 16(C ) 31(H ) 0.08057308  
# 87: 17(C ) 30(H ) 0.08488065  
# 88: 17(C ) 31(H ) 0.85280005  
# 89: 18(C ) 19(C ) 1.51736952  
# 90: 18(C ) 20(C ) 0.12876543  
# 91: 18(C ) 21(C ) 0.13332608  
# 92: 18(C ) 32(H ) 0.85280022  
# 93: 18(C ) 33(H ) 0.08488067  
# 94: 19(C ) 20(C ) 1.41765905  
# 95: 19(C ) 21(C ) 0.12746517  
# 96: 19(C ) 32(H ) 0.08057314  
# 97: 19(C ) 33(H ) 0.87668277  
# 98: 19(C ) 34(H ) 0.08109733  
# 99: 20(C ) 21(C ) 1.50060617  
# 100: 20(C ) 33(H ) 0.08130339  
# 101: 20(C ) 34(H ) 0.87780261  
# 102: 20(C ) 35(H ) 0.08206145  
# 103: 21(C ) 34(H ) 0.08376731  
# 104: 21(C ) 35(H ) 0.86876739

|        |        |        |            |
|--------|--------|--------|------------|
| # 105: | 22(C ) | 23(C ) | 1.46176560 |
| # 106: | 22(C ) | 24(C ) | 0.14206353 |
| # 107: | 22(C ) | 25(C ) | 0.13220943 |
| # 108: | 22(C ) | 26(C ) | 0.12354869 |
| # 109: | 22(C ) | 36(H ) | 0.83592996 |
| # 110: | 22(C ) | 37(H ) | 0.08211446 |
| # 111: | 23(C ) | 24(C ) | 1.40919217 |
| # 112: | 23(C ) | 25(C ) | 0.13028951 |
| # 113: | 23(C ) | 26(C ) | 0.13220920 |
| # 114: | 23(C ) | 27(F ) | 0.13726138 |
| # 115: | 23(C ) | 36(H ) | 0.07924998 |
| # 116: | 23(C ) | 37(H ) | 0.86447953 |
| # 117: | 24(C ) | 25(C ) | 1.40919257 |
| # 118: | 24(C ) | 26(C ) | 0.14206350 |
| # 119: | 24(C ) | 27(F ) | 1.32330443 |
| # 120: | 24(C ) | 37(H ) | 0.08251531 |
| # 121: | 24(C ) | 38(H ) | 0.08251526 |
| # 122: | 25(C ) | 26(C ) | 1.46176496 |
| # 123: | 25(C ) | 27(F ) | 0.13726145 |
| # 124: | 25(C ) | 38(H ) | 0.86447932 |
| # 125: | 25(C ) | 39(H ) | 0.07924999 |
| # 126: | 26(C ) | 38(H ) | 0.08211437 |
| # 127: | 26(C ) | 39(H ) | 0.83592971 |

### 6.19 Wiberg bond orders of **6** extracted by multiwfn (B3LYP/6-311++G\*\*, IEFPCM CH<sub>2</sub>Cl<sub>2</sub>)

Bond orders with absolute value >= 0.050000

|      |       |       |            |
|------|-------|-------|------------|
| # 1: | 1(C ) | 2(C ) | 1.58265147 |
| # 2: | 1(C ) | 3(N ) | 0.13133045 |
| # 3: | 1(C ) | 4(C ) | 0.05279380 |
| # 4: | 1(C ) | 5(C ) | 0.09121155 |
| # 5: | 1(C ) | 6(S ) | 1.25537428 |

# 6: 1(C) 7(S) 1.29574321  
# 7: 1(C) 8(C) 0.14271290  
# 8: 1(C) 9(C) 0.14203531  
# 9: 2(C) 3(N) 1.11155942  
# 10: 2(C) 4(C) 0.10418824  
# 11: 2(C) 5(C) 0.05059049  
# 12: 2(C) 6(S) 0.15519409  
# 13: 2(C) 7(S) 0.20091394  
# 14: 2(C) 8(C) 0.13119802  
# 15: 2(C) 9(C) 1.12380065  
# 16: 2(C) 13(C) 0.09608415  
# 17: 2(C) 23(C) 0.10322991  
# 18: 3(N) 4(C) 1.18632617  
# 19: 3(N) 5(C) 0.13746102  
# 20: 3(N) 9(C) 0.09625664  
# 21: 3(N) 10(S) 0.12000341  
# 22: 3(N) 13(C) 1.08294799  
# 23: 3(N) 14(C) 0.12315430  
# 24: 3(N) 18(C) 0.11557614  
# 25: 4(C) 5(C) 1.58182934  
# 26: 4(C) 6(S) 0.14882954  
# 27: 4(C) 10(S) 1.23188881  
# 28: 4(C) 11(C) 0.13700409  
# 29: 4(C) 12(C) 0.14569560  
# 30: 4(C) 13(C) 0.10022033  
# 31: 5(C) 6(S) 1.18608255  
# 32: 5(C) 10(S) 0.19448428  
# 33: 5(C) 11(C) 0.13213400  
# 34: 5(C) 12(C) 1.17181593  
# 35: 5(C) 27(C) 0.11100924  
# 36: 6(S) 7(S) 0.13887327  
# 37: 6(S) 12(C) 0.11663240  
# 38: 7(S) 8(C) 1.27025932



# 39: 7(S) 9(C) 0.16032844  
# 40: 7(S) 20(C) 0.13856999  
# 41: 8(C) 9(C) 1.29826777  
# 42: 8(C) 20(C) 1.41647440  
# 43: 8(C) 21(C) 0.13509177  
# 44: 8(C) 22(C) 0.11872859  
# 45: 8(C) 23(C) 0.11668869  
# 46: 8(C) 32(H) 0.08047290  
# 47: 9(C) 20(C) 0.11932530  
# 48: 9(C) 21(C) 0.10984086  
# 49: 9(C) 22(C) 0.13118632  
# 50: 9(C) 23(C) 1.32462544  
# 51: 9(C) 35(H) 0.07571539  
# 52: 10(S) 11(C) 1.26711500  
# 53: 10(S) 12(C) 0.15835153  
# 54: 10(S) 14(C) 0.05619502  
# 55: 10(S) 24(C) 0.13970275  
# 56: 11(C) 12(C) 1.29280056  
# 57: 11(C) 24(C) 1.41972531  
# 58: 11(C) 25(C) 0.13505828  
# 59: 11(C) 26(C) 0.11876808  
# 60: 11(C) 27(C) 0.11681103  
# 61: 11(C) 36(H) 0.08040125  
# 62: 12(C) 24(C) 0.11869901  
# 63: 12(C) 25(C) 0.11002887  
# 64: 12(C) 26(C) 0.13109754  
# 65: 12(C) 27(C) 1.34121337  
# 66: 12(C) 39(H) 0.07737945  
# 67: 13(C) 14(C) 1.38172985  
# 68: 13(C) 15(C) 0.13096716  
# 69: 13(C) 16(C) 0.12481410  
# 70: 13(C) 17(C) 0.13056579  
# 71: 13(C) 18(C) 1.37393427

# 72: 13(C ) 28(H ) 0.07622623  
# 73: 13(C ) 31(H ) 0.07558172  
# 74: 14(C ) 15(C ) 1.45655999  
# 75: 14(C ) 16(C ) 0.14188231  
# 76: 14(C ) 17(C ) 0.13334741  
# 77: 14(C ) 18(C ) 0.12441079  
# 78: 14(C ) 28(H ) 0.84799924  
# 79: 14(C ) 29(H ) 0.08198645  
# 80: 15(C ) 16(C ) 1.40956806  
# 81: 15(C ) 17(C ) 0.12846817  
# 82: 15(C ) 18(C ) 0.13400791  
# 83: 15(C ) 19(F ) 0.13881619  
# 84: 15(C ) 28(H ) 0.07957183  
# 85: 15(C ) 29(H ) 0.86450149  
# 86: 16(C ) 17(C ) 1.40569831  
# 87: 16(C ) 18(C ) 0.14232975  
# 88: 16(C ) 19(F ) 1.33806632  
# 89: 16(C ) 29(H ) 0.08258740  
# 90: 16(C ) 30(H ) 0.08247811  
# 91: 17(C ) 18(C ) 1.46106927  
# 92: 17(C ) 19(F ) 0.13844472  
# 93: 17(C ) 30(H ) 0.86435622  
# 94: 17(C ) 31(H ) 0.07860108  
# 95: 18(C ) 30(H ) 0.08220839  
# 96: 18(C ) 31(H ) 0.84215115  
# 97: 20(C ) 21(C ) 1.49813995  
# 98: 20(C ) 22(C ) 0.12776457  
# 99: 20(C ) 23(C ) 0.13303123  
# 100: 20(C ) 32(H ) 0.86880460  
# 101: 20(C ) 33(H ) 0.08371429  
# 102: 21(C ) 22(C ) 1.42098307  
# 103: 21(C ) 23(C ) 0.12875825  
# 104: 21(C ) 32(H ) 0.08194076

|        |        |        |            |
|--------|--------|--------|------------|
| # 105: | 21(C ) | 33(H ) | 0.87791433 |
| # 106: | 21(C ) | 34(H ) | 0.08134919 |
| # 107: | 22(C ) | 23(C ) | 1.51411783 |
| # 108: | 22(C ) | 33(H ) | 0.08129348 |
| # 109: | 22(C ) | 34(H ) | 0.87665688 |
| # 110: | 22(C ) | 35(H ) | 0.08069918 |
| # 111: | 23(C ) | 34(H ) | 0.08485478 |
| # 112: | 23(C ) | 35(H ) | 0.84876687 |
| # 113: | 24(C ) | 25(C ) | 1.49484044 |
| # 114: | 24(C ) | 26(C ) | 0.12776030 |
| # 115: | 24(C ) | 27(C ) | 0.13295024 |
| # 116: | 24(C ) | 36(H ) | 0.86877309 |
| # 117: | 24(C ) | 37(H ) | 0.08364923 |
| # 118: | 25(C ) | 26(C ) | 1.42572925 |
| # 119: | 25(C ) | 27(C ) | 0.12789345 |
| # 120: | 25(C ) | 36(H ) | 0.08185787 |
| # 121: | 25(C ) | 37(H ) | 0.87809683 |
| # 122: | 25(C ) | 38(H ) | 0.08151749 |
| # 123: | 26(C ) | 27(C ) | 1.51274709 |
| # 124: | 26(C ) | 37(H ) | 0.08143638 |
| # 125: | 26(C ) | 38(H ) | 0.87735167 |
| # 126: | 26(C ) | 39(H ) | 0.08171155 |
| # 127: | 27(C ) | 38(H ) | 0.08462383 |
| # 128: | 27(C ) | 39(H ) | 0.86207859 |

## 6.20 Wiberg bond orders of **7** extracted by multiwfn (B3LYP/6-311++G\*\*, IEFPCM CH<sub>2</sub>Cl<sub>2</sub>)

Bond orders with absolute value >= 0.050000

|      |       |       |            |
|------|-------|-------|------------|
| # 1: | 1(C ) | 2(C ) | 1.56397627 |
| # 2: | 1(C ) | 3(N ) | 0.14673314 |
| # 3: | 1(C ) | 4(C ) | 0.05162217 |
| # 4: | 1(C ) | 5(C ) | 0.09316786 |

# 5: 1(C ) 6(S ) 1.18378244  
# 6: 1(C ) 20(C ) 1.17910164  
# 7: 1(C ) 21(C ) 0.13243288  
# 8: 1(C ) 22(S ) 0.18586661  
# 9: 1(C ) 23(C ) 0.11253513  
# 10: 2(C ) 3(N ) 1.19343718  
# 11: 2(C ) 4(C ) 0.10530640  
# 12: 2(C ) 5(C ) 0.05162217  
# 13: 2(C ) 6(S ) 0.14585284  
# 14: 2(C ) 7(C ) 0.10142515  
# 15: 2(C ) 20(C ) 0.14757593  
# 16: 2(C ) 21(C ) 0.13667312  
# 17: 2(C ) 22(S ) 1.23067429  
# 18: 3(N ) 4(C ) 1.19343774  
# 19: 3(N ) 5(C ) 0.14673323  
# 20: 3(N ) 7(C ) 1.07105270  
# 21: 3(N ) 8(C ) 0.11627229  
# 22: 3(N ) 12(C ) 0.11520951  
# 23: 3(N ) 15(S ) 0.11508799  
# 24: 3(N ) 22(S ) 0.11508795  
# 25: 4(C ) 5(C ) 1.56397631  
# 26: 4(C ) 6(S ) 0.14585277  
# 27: 4(C ) 7(C ) 0.10142514  
# 28: 4(C ) 13(C ) 0.13667308  
# 29: 4(C ) 14(C ) 0.14757590  
# 30: 4(C ) 15(S ) 1.23067401  
# 31: 5(C ) 6(S ) 1.18378208  
# 32: 5(C ) 13(C ) 0.13243291  
# 33: 5(C ) 14(C ) 1.17910172  
# 34: 5(C ) 15(S ) 0.18586655  
# 35: 5(C ) 19(C ) 0.11253515  
# 36: 6(S ) 14(C ) 0.11880477  
# 37: 6(S ) 19(C ) 0.05006291

# 38: 6(S ) 20(C ) 0.11880480  
# 39: 6(S ) 23(C ) 0.05006291  
# 40: 7(C ) 8(C ) 1.38091932  
# 41: 7(C ) 9(C ) 0.13214407  
# 42: 7(C ) 10(C ) 0.12615634  
# 43: 7(C ) 11(C ) 0.13128055  
# 44: 7(C ) 12(C ) 1.38297652  
# 45: 7(C ) 15(S ) 0.06879937  
# 46: 7(C ) 22(S ) 0.06879942  
# 47: 7(C ) 27(H ) 0.07702682  
# 48: 7(C ) 30(H ) 0.07636708  
# 49: 8(C ) 9(C ) 1.46746363  
# 50: 8(C ) 10(C ) 0.14275753  
# 51: 8(C ) 11(C ) 0.13460384  
# 52: 8(C ) 12(C ) 0.12414021  
# 53: 8(C ) 27(H ) 0.85290105  
# 54: 8(C ) 28(H ) 0.08258567  
# 55: 9(C ) 10(C ) 1.40139084  
# 56: 9(C ) 11(C ) 0.12754380  
# 57: 9(C ) 12(C ) 0.13206415  
# 58: 9(C ) 27(H ) 0.07965918  
# 59: 9(C ) 28(H ) 0.86411323  
# 60: 9(C ) 39(F ) 0.13896823  
# 61: 10(C ) 11(C ) 1.41081672  
# 62: 10(C ) 12(C ) 0.14254223  
# 63: 10(C ) 28(H ) 0.08227461  
# 64: 10(C ) 29(H ) 0.08256978  
# 65: 10(C ) 39(F ) 1.34770754  
# 66: 11(C ) 12(C ) 1.45369916  
# 67: 11(C ) 29(H ) 0.86379673  
# 68: 11(C ) 30(H ) 0.07872176  
# 69: 11(C ) 39(F ) 0.13974707  
# 70: 12(C ) 29(H ) 0.08201226

# 71: 12(C ) 30(H ) 0.84806139  
# 72: 13(C ) 14(C ) 1.28872433  
# 73: 13(C ) 15(S ) 1.25319016  
# 74: 13(C ) 16(C ) 1.42779088  
# 75: 13(C ) 17(C ) 0.13541266  
# 76: 13(C ) 18(C ) 0.11923142  
# 77: 13(C ) 19(C ) 0.11713617  
# 78: 13(C ) 31(H ) 0.08072406  
# 79: 14(C ) 15(S ) 0.15664438  
# 80: 14(C ) 16(C ) 0.11835267  
# 81: 14(C ) 17(C ) 0.10879922  
# 82: 14(C ) 18(C ) 0.13061721  
# 83: 14(C ) 19(C ) 1.33839920  
# 84: 14(C ) 34(H ) 0.07736447  
# 85: 15(S ) 16(C ) 0.13920266  
# 86: 16(C ) 17(C ) 1.48772073  
# 87: 16(C ) 18(C ) 0.12768948  
# 88: 16(C ) 19(C ) 0.13130437  
# 89: 16(C ) 31(H ) 0.86879615  
# 90: 16(C ) 32(H ) 0.08345981  
# 91: 17(C ) 18(C ) 1.42933648  
# 92: 17(C ) 19(C ) 0.12776553  
# 93: 17(C ) 31(H ) 0.08155001  
# 94: 17(C ) 32(H ) 0.87852748  
# 95: 17(C ) 33(H ) 0.08162953  
# 96: 18(C ) 19(C ) 1.51079503  
# 97: 18(C ) 32(H ) 0.08157520  
# 98: 18(C ) 33(H ) 0.87748154  
# 99: 18(C ) 34(H ) 0.08164534  
# 100: 19(C ) 33(H ) 0.08458109  
# 101: 19(C ) 34(H ) 0.86244127  
# 102: 20(C ) 21(C ) 1.28872440  
# 103: 20(C ) 22(S ) 0.15664438

|        |               |            |
|--------|---------------|------------|
| # 104: | 20(C ) 23(C ) | 1.33839916 |
| # 105: | 20(C ) 24(C ) | 0.13061720 |
| # 106: | 20(C ) 25(C ) | 0.10879922 |
| # 107: | 20(C ) 26(C ) | 0.11835266 |
| # 108: | 20(C ) 35(H ) | 0.07736446 |
| # 109: | 21(C ) 22(S ) | 1.25319003 |
| # 110: | 21(C ) 23(C ) | 0.11713619 |
| # 111: | 21(C ) 24(C ) | 0.11923141 |
| # 112: | 21(C ) 25(C ) | 0.13541267 |
| # 113: | 21(C ) 26(C ) | 1.42779088 |
| # 114: | 21(C ) 38(H ) | 0.08072406 |
| # 115: | 22(S ) 26(C ) | 0.13920265 |
| # 116: | 23(C ) 24(C ) | 1.51079506 |
| # 117: | 23(C ) 25(C ) | 0.12776553 |
| # 118: | 23(C ) 26(C ) | 0.13130439 |
| # 119: | 23(C ) 35(H ) | 0.86244127 |
| # 120: | 23(C ) 36(H ) | 0.08458109 |
| # 121: | 24(C ) 25(C ) | 1.42933650 |
| # 122: | 24(C ) 26(C ) | 0.12768949 |
| # 123: | 24(C ) 35(H ) | 0.08164535 |
| # 124: | 24(C ) 36(H ) | 0.87748153 |
| # 125: | 24(C ) 37(H ) | 0.08157520 |
| # 126: | 25(C ) 26(C ) | 1.48772073 |
| # 127: | 25(C ) 36(H ) | 0.08162953 |
| # 128: | 25(C ) 37(H ) | 0.87852747 |
| # 129: | 25(C ) 38(H ) | 0.08155000 |
| # 130: | 26(C ) 37(H ) | 0.08345981 |
| # 131: | 26(C ) 38(H ) | 0.86879615 |

## 6.21 Wiberg bond orders of 5<sup>•+</sup> extracted by multiwfn (B3LYP/6-311++G<sup>\*\*</sup>, IEFPCM CH<sub>2</sub>Cl<sub>2</sub>)

Bond orders with absolute value >= 0.050000

# 1: 1(C) 2(C) Alpha: 0.770246 Beta: 0.649691 Total: 1.419937  
 # 2: 1(C) 3(N) Alpha: 0.074106 Beta: 0.051404 Total: 0.125511  
 # 3: 1(C) 4(C) Alpha: 0.021443 Beta: 0.046052 Total: 0.067495  
 # 4: 1(C) 5(C) Alpha: 0.047142 Beta: 0.060720 Total: 0.107862  
 # 5: 1(C) 6(S) Alpha: 0.625563 Beta: 0.727037 Total: 1.352600  
 # 6: 1(C) 10(S) Alpha: 0.657494 Beta: 0.691985 Total: 1.349479  
 # 7: 1(C) 11(C) Alpha: 0.075737 Beta: 0.062092 Total: 0.137830  
 # 8: 1(C) 12(C) Alpha: 0.069503 Beta: 0.065362 Total: 0.134865  
 # 9: 2(C) 3(N) Alpha: 0.576599 Beta: 0.655518 Total: 1.232117  
 # 10: 2(C) 4(C) Alpha: 0.047878 Beta: 0.063502 Total: 0.111380  
 # 11: 2(C) 5(C) Alpha: 0.021443 Beta: 0.046052 Total: 0.067495  
 # 12: 2(C) 6(S) Alpha: 0.072325 Beta: 0.055262 Total: 0.127587  
 # 13: 2(C) 10(S) Alpha: 0.105491 Beta: 0.082681 Total: 0.188172  
 # 14: 2(C) 11(C) Alpha: 0.064834 Beta: 0.064612 Total: 0.129447  
 # 15: 2(C) 12(C) Alpha: 0.559782 Beta: 0.551558 Total: 1.111340  
 # 16: 2(C) 13(C) Alpha: 0.046724 Beta: 0.050129 Total: 0.096853  
 # 17: 2(C) 17(C) Alpha: 0.048151 Beta: 0.048014 Total: 0.096165  
 # 18: 3(N) 4(C) Alpha: 0.576599 Beta: 0.655518 Total: 1.232117  
 # 19: 3(N) 5(C) Alpha: 0.074106 Beta: 0.051404 Total: 0.125511  
 # 20: 3(N) 6(S) Alpha: 0.023848 Beta: 0.049637 Total: 0.073486  
 # 21: 3(N) 7(C) Alpha: 0.045415 Beta: 0.046327 Total: 0.091742  
 # 22: 3(N) 12(C) Alpha: 0.045415 Beta: 0.046327 Total: 0.091742  
 # 23: 3(N) 13(C) Alpha: 0.527979 Beta: 0.511015 Total: 1.038995  
 # 24: 3(N) 22(C) Alpha: 0.057823 Beta: 0.053670 Total: 0.111493  
 # 25: 3(N) 26(C) Alpha: 0.057823 Beta: 0.053670 Total: 0.111493  
 # 26: 4(C) 5(C) Alpha: 0.770246 Beta: 0.649691 Total: 1.419937  
 # 27: 4(C) 6(S) Alpha: 0.072325 Beta: 0.055262 Total: 0.127587  
 # 28: 4(C) 7(C) Alpha: 0.559783 Beta: 0.551559 Total: 1.111341  
 # 29: 4(C) 8(C) Alpha: 0.064835 Beta: 0.064612 Total: 0.129447  
 # 30: 4(C) 9(S) Alpha: 0.105491 Beta: 0.082681 Total: 0.188172  
 # 31: 4(C) 13(C) Alpha: 0.046724 Beta: 0.050129 Total: 0.096853  
 # 32: 4(C) 18(C) Alpha: 0.048151 Beta: 0.048014 Total: 0.096165  
 # 33: 5(C) 6(S) Alpha: 0.625563 Beta: 0.727037 Total: 1.352600



# 34: 5(C ) 7(C ) Alpha: 0.069503 Beta: 0.065362 Total: 0.134865  
# 35: 5(C ) 8(C ) Alpha: 0.075737 Beta: 0.062092 Total: 0.137830  
# 36: 5(C ) 9(S ) Alpha: 0.657494 Beta: 0.691984 Total: 1.349478  
# 37: 6(S ) 9(S ) Alpha: 0.073854 Beta: 0.098879 Total: 0.172733  
# 38: 6(S ) 10(S ) Alpha: 0.073854 Beta: 0.098879 Total: 0.172734  
# 39: 7(C ) 8(C ) Alpha: 0.647111 Beta: 0.649160 Total: 1.296271  
# 40: 7(C ) 9(S ) Alpha: 0.076063 Beta: 0.074745 Total: 0.150808  
# 41: 7(C ) 18(C ) Alpha: 0.654607 Beta: 0.657935 Total: 1.312542  
# 42: 7(C ) 19(C ) Alpha: 0.064353 Beta: 0.064277 Total: 0.128630  
# 43: 7(C ) 20(C ) Alpha: 0.053725 Beta: 0.055254 Total: 0.108979  
# 44: 7(C ) 21(C ) Alpha: 0.058194 Beta: 0.058348 Total: 0.116542  
# 45: 7(C ) 32(H ) Alpha: 0.035304 Beta: 0.035338 Total: 0.070642  
# 46: 8(C ) 9(S ) Alpha: 0.637515 Beta: 0.621869 Total: 1.259384  
# 47: 8(C ) 18(C ) Alpha: 0.059249 Beta: 0.060135 Total: 0.119384  
# 48: 8(C ) 19(C ) Alpha: 0.058159 Beta: 0.059869 Total: 0.118028  
# 49: 8(C ) 20(C ) Alpha: 0.067611 Beta: 0.068086 Total: 0.135697  
# 50: 8(C ) 21(C ) Alpha: 0.705486 Beta: 0.713784 Total: 1.419270  
# 51: 8(C ) 35(H ) Alpha: 0.040277 Beta: 0.040447 Total: 0.080725  
# 52: 9(S ) 21(C ) Alpha: 0.070796 Beta: 0.069573 Total: 0.140369  
# 53: 10(S ) 11(C ) Alpha: 0.637515 Beta: 0.621869 Total: 1.259384  
# 54: 10(S ) 12(C ) Alpha: 0.076062 Beta: 0.074745 Total: 0.150807  
# 55: 10(S ) 14(C ) Alpha: 0.070796 Beta: 0.069573 Total: 0.140369  
# 56: 11(C ) 12(C ) Alpha: 0.647111 Beta: 0.649160 Total: 1.296271  
# 57: 11(C ) 14(C ) Alpha: 0.705487 Beta: 0.713785 Total: 1.419271  
# 58: 11(C ) 15(C ) Alpha: 0.067611 Beta: 0.068086 Total: 0.135697  
# 59: 11(C ) 16(C ) Alpha: 0.058159 Beta: 0.059869 Total: 0.118028  
# 60: 11(C ) 17(C ) Alpha: 0.059249 Beta: 0.060135 Total: 0.119384  
# 61: 11(C ) 28(H ) Alpha: 0.040277 Beta: 0.040447 Total: 0.080725  
# 62: 12(C ) 14(C ) Alpha: 0.058194 Beta: 0.058348 Total: 0.116542  
# 63: 12(C ) 15(C ) Alpha: 0.053725 Beta: 0.055254 Total: 0.108979  
# 64: 12(C ) 16(C ) Alpha: 0.064353 Beta: 0.064277 Total: 0.128630  
# 65: 12(C ) 17(C ) Alpha: 0.654608 Beta: 0.657936 Total: 1.312543  
# 66: 12(C ) 31(H ) Alpha: 0.035304 Beta: 0.035339 Total: 0.070642

# 67: 13(C ) 22(C ) Alpha: 0.686886 Beta: 0.684011 Total: 1.370897  
# 68: 13(C ) 23(C ) Alpha: 0.067119 Beta: 0.067158 Total: 0.134277  
# 69: 13(C ) 24(C ) Alpha: 0.064212 Beta: 0.064206 Total: 0.128418  
# 70: 13(C ) 25(C ) Alpha: 0.067119 Beta: 0.067158 Total: 0.134277  
# 71: 13(C ) 26(C ) Alpha: 0.686885 Beta: 0.684010 Total: 1.370895  
# 72: 13(C ) 36(H ) Alpha: 0.038525 Beta: 0.038578 Total: 0.077104  
# 73: 13(C ) 39(H ) Alpha: 0.038525 Beta: 0.038578 Total: 0.077103  
# 74: 14(C ) 15(C ) Alpha: 0.751433 Beta: 0.739956 Total: 1.491389  
# 75: 14(C ) 16(C ) Alpha: 0.065066 Beta: 0.064809 Total: 0.129875  
# 76: 14(C ) 17(C ) Alpha: 0.067359 Beta: 0.063636 Total: 0.130995  
# 77: 14(C ) 28(H ) Alpha: 0.432104 Beta: 0.432417 Total: 0.864521  
# 78: 14(C ) 29(H ) Alpha: 0.041859 Beta: 0.041633 Total: 0.083492  
# 79: 15(C ) 16(C ) Alpha: 0.707025 Beta: 0.711821 Total: 1.418847  
# 80: 15(C ) 17(C ) Alpha: 0.064786 Beta: 0.065939 Total: 0.130725  
# 81: 15(C ) 28(H ) Alpha: 0.040665 Beta: 0.040501 Total: 0.081165  
# 82: 15(C ) 29(H ) Alpha: 0.437767 Beta: 0.436960 Total: 0.874727  
# 83: 15(C ) 30(H ) Alpha: 0.040300 Beta: 0.040429 Total: 0.080730  
# 84: 16(C ) 17(C ) Alpha: 0.757221 Beta: 0.750714 Total: 1.507935  
# 85: 16(C ) 29(H ) Alpha: 0.040555 Beta: 0.040639 Total: 0.081194  
# 86: 16(C ) 30(H ) Alpha: 0.436098 Beta: 0.436464 Total: 0.872562  
# 87: 16(C ) 31(H ) Alpha: 0.040559 Beta: 0.040419 Total: 0.080978  
# 88: 17(C ) 30(H ) Alpha: 0.042557 Beta: 0.042477 Total: 0.085034  
# 89: 17(C ) 31(H ) Alpha: 0.416577 Beta: 0.415754 Total: 0.832331  
# 90: 18(C ) 19(C ) Alpha: 0.757221 Beta: 0.750715 Total: 1.507936  
# 91: 18(C ) 20(C ) Alpha: 0.064786 Beta: 0.065939 Total: 0.130725  
# 92: 18(C ) 21(C ) Alpha: 0.067359 Beta: 0.063636 Total: 0.130995  
# 93: 18(C ) 32(H ) Alpha: 0.416577 Beta: 0.415754 Total: 0.832330  
# 94: 18(C ) 33(H ) Alpha: 0.042557 Beta: 0.042477 Total: 0.085034  
# 95: 19(C ) 20(C ) Alpha: 0.707025 Beta: 0.711821 Total: 1.418846  
# 96: 19(C ) 21(C ) Alpha: 0.065066 Beta: 0.064809 Total: 0.129875  
# 97: 19(C ) 32(H ) Alpha: 0.040559 Beta: 0.040419 Total: 0.080978  
# 98: 19(C ) 33(H ) Alpha: 0.436098 Beta: 0.436464 Total: 0.872561  
# 99: 19(C ) 34(H ) Alpha: 0.040555 Beta: 0.040639 Total: 0.081194

# 100: 20(C) 21(C) Alpha: 0.751434 Beta: 0.739956 Total: 1.491390  
# 101: 20(C) 33(H) Alpha: 0.040300 Beta: 0.040429 Total: 0.080730  
# 102: 20(C) 34(H) Alpha: 0.437767 Beta: 0.436960 Total: 0.874727  
# 103: 20(C) 35(H) Alpha: 0.040665 Beta: 0.040501 Total: 0.081165  
# 104: 21(C) 34(H) Alpha: 0.041859 Beta: 0.041633 Total: 0.083492  
# 105: 21(C) 35(H) Alpha: 0.432104 Beta: 0.432417 Total: 0.864521  
# 106: 22(C) 23(C) Alpha: 0.724507 Beta: 0.723932 Total: 1.448438  
# 107: 22(C) 24(C) Alpha: 0.071503 Beta: 0.071537 Total: 0.143040  
# 108: 22(C) 25(C) Alpha: 0.067188 Beta: 0.067262 Total: 0.134450  
# 109: 22(C) 26(C) Alpha: 0.062951 Beta: 0.062374 Total: 0.125325  
# 110: 22(C) 36(H) Alpha: 0.420632 Beta: 0.420706 Total: 0.841338  
# 111: 22(C) 37(H) Alpha: 0.041119 Beta: 0.041007 Total: 0.082126  
# 112: 23(C) 24(C) Alpha: 0.696870 Beta: 0.696817 Total: 1.393687  
# 113: 23(C) 25(C) Alpha: 0.064366 Beta: 0.064305 Total: 0.128671  
# 114: 23(C) 26(C) Alpha: 0.067188 Beta: 0.067262 Total: 0.134450  
# 115: 23(C) 27(F) Alpha: 0.069770 Beta: 0.069764 Total: 0.139534  
# 116: 23(C) 36(H) Alpha: 0.038890 Beta: 0.038893 Total: 0.077784  
# 117: 23(C) 37(H) Alpha: 0.430309 Beta: 0.430074 Total: 0.860383  
# 118: 24(C) 25(C) Alpha: 0.696870 Beta: 0.696816 Total: 1.393686  
# 119: 24(C) 26(C) Alpha: 0.071503 Beta: 0.071537 Total: 0.143040  
# 120: 24(C) 27(F) Alpha: 0.681652 Beta: 0.681730 Total: 1.363382  
# 121: 24(C) 37(H) Alpha: 0.040872 Beta: 0.040867 Total: 0.081739  
# 122: 24(C) 38(H) Alpha: 0.040872 Beta: 0.040867 Total: 0.081739  
# 123: 25(C) 26(C) Alpha: 0.724508 Beta: 0.723932 Total: 1.448440  
# 124: 25(C) 27(F) Alpha: 0.069770 Beta: 0.069764 Total: 0.139534  
# 125: 25(C) 38(H) Alpha: 0.430309 Beta: 0.430075 Total: 0.860383  
# 126: 25(C) 39(H) Alpha: 0.038890 Beta: 0.038893 Total: 0.077784  
# 127: 26(C) 38(H) Alpha: 0.041119 Beta: 0.041007 Total: 0.082126  
# 128: 26(C) 39(H) Alpha: 0.420632 Beta: 0.420706 Total: 0.841338

## 6.22 Wiberg bond orders of $6^{*+}$ extracted by multiwfn (B3LYP/6-311++G\*\*, IEFPCM $CH_2Cl_2$ )

Bond orders with absolute value  $\geq 0.050000$

# 1: 1(C) 2(C) Alpha: 0.768835 Beta: 0.651485 Total: 1.420321  
# 2: 1(C) 3(N) Alpha: 0.071769 Beta: 0.051292 Total: 0.123061  
# 3: 1(C) 4(C) Alpha: 0.023205 Beta: 0.047867 Total: 0.071073  
# 4: 1(C) 5(C) Alpha: 0.046020 Beta: 0.059096 Total: 0.105115  
# 5: 1(C) 6(S) Alpha: 0.625409 Beta: 0.727196 Total: 1.352605  
# 6: 1(C) 7(S) Alpha: 0.658725 Beta: 0.687697 Total: 1.346422  
# 7: 1(C) 8(C) Alpha: 0.075529 Beta: 0.061788 Total: 0.137318  
# 8: 1(C) 9(C) Alpha: 0.069392 Beta: 0.065214 Total: 0.134605  
# 9: 2(C) 3(N) Alpha: 0.572036 Beta: 0.646350 Total: 1.218386  
# 10: 2(C) 4(C) Alpha: 0.050076 Beta: 0.066569 Total: 0.116645  
# 11: 2(C) 5(C) Alpha: 0.020451 Beta: 0.045257 Total: 0.065708  
# 12: 2(C) 6(S) Alpha: 0.072470 Beta: 0.054981 Total: 0.127452  
# 13: 2(C) 7(S) Alpha: 0.105682 Beta: 0.083914 Total: 0.189595  
# 14: 2(C) 8(C) Alpha: 0.065820 Beta: 0.065615 Total: 0.131435  
# 15: 2(C) 9(C) Alpha: 0.564836 Beta: 0.557962 Total: 1.122798  
# 16: 2(C) 13(C) Alpha: 0.044417 Beta: 0.047211 Total: 0.091629  
# 17: 2(C) 23(C) Alpha: 0.049279 Beta: 0.049119 Total: 0.098398  
# 18: 3(N) 4(C) Alpha: 0.608709 Beta: 0.685301 Total: 1.294010  
# 19: 3(N) 5(C) Alpha: 0.074298 Beta: 0.051837 Total: 0.126135  
# 20: 3(N) 6(S) Alpha: 0.022664 Beta: 0.049061 Total: 0.071725  
# 21: 3(N) 9(C) Alpha: 0.045638 Beta: 0.046901 Total: 0.092539  
# 22: 3(N) 10(S) Alpha: 0.060385 Beta: 0.071731 Total: 0.132116  
# 23: 3(N) 13(C) Alpha: 0.523673 Beta: 0.508871 Total: 1.032544  
# 24: 3(N) 14(C) Alpha: 0.056913 Beta: 0.053234 Total: 0.110148  
# 25: 3(N) 18(C) Alpha: 0.056880 Beta: 0.053202 Total: 0.110082  
# 26: 4(C) 5(C) Alpha: 0.761281 Beta: 0.646108 Total: 1.407389  
# 27: 4(C) 6(S) Alpha: 0.070788 Beta: 0.057318 Total: 0.128106  
# 28: 4(C) 10(S) Alpha: 0.632424 Beta: 0.631053 Total: 1.263478  
# 29: 4(C) 11(C) Alpha: 0.069666 Beta: 0.058303 Total: 0.127968  
# 30: 4(C) 12(C) Alpha: 0.072076 Beta: 0.068384 Total: 0.140460  
# 31: 4(C) 13(C) Alpha: 0.054645 Beta: 0.058135 Total: 0.112780  
# 32: 5(C) 6(S) Alpha: 0.599472 Beta: 0.701838 Total: 1.301310

# 33: 5(C ) 10(S ) Alpha: 0.097889 Beta: 0.081166 Total: 0.179056  
 # 34: 5(C ) 11(C ) Alpha: 0.067315 Beta: 0.065259 Total: 0.132574  
 # 35: 5(C ) 12(C ) Alpha: 0.593770 Beta: 0.593068 Total: 1.186838  
 # 36: 5(C ) 27(C ) Alpha: 0.056842 Beta: 0.055241 Total: 0.112083  
 # 37: 6(S ) 7(S ) Alpha: 0.074075 Beta: 0.098122 Total: 0.172197  
 # 38: 6(S ) 12(C ) Alpha: 0.059648 Beta: 0.063406 Total: 0.123053  
 # 39: 6(S ) 27(C ) Alpha: 0.025256 Beta: 0.032529 Total: 0.057785  
 # 40: 7(S ) 8(C ) Alpha: 0.637229 Beta: 0.622451 Total: 1.259681  
 # 41: 7(S ) 9(C ) Alpha: 0.075985 Beta: 0.074894 Total: 0.150879  
 # 42: 7(S ) 20(C ) Alpha: 0.070049 Beta: 0.069150 Total: 0.139198  
 # 43: 8(C ) 9(C ) Alpha: 0.646141 Beta: 0.647406 Total: 1.293547  
 # 44: 8(C ) 20(C ) Alpha: 0.705671 Beta: 0.713571 Total: 1.419242  
 # 45: 8(C ) 21(C ) Alpha: 0.067651 Beta: 0.068151 Total: 0.135801  
 # 46: 8(C ) 22(C ) Alpha: 0.058061 Beta: 0.059401 Total: 0.117462  
 # 47: 8(C ) 23(C ) Alpha: 0.058751 Beta: 0.059650 Total: 0.118401  
 # 48: 8(C ) 32(H ) Alpha: 0.040267 Beta: 0.040434 Total: 0.080701  
 # 49: 9(C ) 20(C ) Alpha: 0.058566 Beta: 0.058678 Total: 0.117244  
 # 50: 9(C ) 21(C ) Alpha: 0.053693 Beta: 0.054789 Total: 0.108483  
 # 51: 9(C ) 22(C ) Alpha: 0.064861 Beta: 0.064785 Total: 0.129645  
 # 52: 9(C ) 23(C ) Alpha: 0.655309 Beta: 0.657327 Total: 1.312636  
 # 53: 9(C ) 35(H ) Alpha: 0.035960 Beta: 0.035971 Total: 0.071930  
 # 54: 10(S ) 11(C ) Alpha: 0.620419 Beta: 0.612860 Total: 1.233280  
 # 55: 10(S ) 12(C ) Alpha: 0.074798 Beta: 0.074157 Total: 0.148955  
 # 56: 10(S ) 13(C ) Alpha: 0.046540 Beta: 0.046774 Total: 0.093314  
 # 57: 10(S ) 24(C ) Alpha: 0.067621 Beta: 0.068249 Total: 0.135870  
 # 58: 11(C ) 12(C ) Alpha: 0.645654 Beta: 0.641776 Total: 1.287430  
 # 59: 11(C ) 24(C ) Alpha: 0.710508 Beta: 0.714926 Total: 1.425435  
 # 60: 11(C ) 25(C ) Alpha: 0.068147 Beta: 0.068784 Total: 0.136931  
 # 61: 11(C ) 26(C ) Alpha: 0.059264 Beta: 0.057183 Total: 0.116447  
 # 62: 11(C ) 27(C ) Alpha: 0.058019 Beta: 0.058976 Total: 0.116995  
 # 63: 11(C ) 36(H ) Alpha: 0.040203 Beta: 0.040363 Total: 0.080566  
 # 64: 12(C ) 24(C ) Alpha: 0.059465 Beta: 0.059345 Total: 0.118810  
 # 65: 12(C ) 25(C ) Alpha: 0.054651 Beta: 0.053386 Total: 0.108037

# 66: 12(C ) 26(C ) Alpha: 0.065933 Beta: 0.065947 Total: 0.131880  
# 67: 12(C ) 27(C ) Alpha: 0.666880 Beta: 0.660337 Total: 1.327218  
# 68: 12(C ) 39(H ) Alpha: 0.038541 Beta: 0.038363 Total: 0.076904  
# 69: 13(C ) 14(C ) Alpha: 0.688215 Beta: 0.685786 Total: 1.374001  
# 70: 13(C ) 15(C ) Alpha: 0.067181 Beta: 0.067237 Total: 0.134418  
# 71: 13(C ) 16(C ) Alpha: 0.063374 Beta: 0.063367 Total: 0.126741  
# 72: 13(C ) 17(C ) Alpha: 0.067147 Beta: 0.067201 Total: 0.134348  
# 73: 13(C ) 18(C ) Alpha: 0.687819 Beta: 0.685246 Total: 1.373066  
# 74: 13(C ) 28(H ) Alpha: 0.038389 Beta: 0.038419 Total: 0.076808  
# 75: 13(C ) 31(H ) Alpha: 0.038398 Beta: 0.038432 Total: 0.076831  
# 76: 14(C ) 15(C ) Alpha: 0.727856 Beta: 0.727311 Total: 1.455167  
# 77: 14(C ) 16(C ) Alpha: 0.071601 Beta: 0.071630 Total: 0.143232  
# 78: 14(C ) 17(C ) Alpha: 0.066310 Beta: 0.066369 Total: 0.132679  
# 79: 14(C ) 18(C ) Alpha: 0.062565 Beta: 0.062074 Total: 0.124639  
# 80: 14(C ) 28(H ) Alpha: 0.422636 Beta: 0.422702 Total: 0.845338  
# 81: 14(C ) 29(H ) Alpha: 0.041163 Beta: 0.041053 Total: 0.082216  
# 82: 15(C ) 16(C ) Alpha: 0.699109 Beta: 0.699085 Total: 1.398194  
# 83: 15(C ) 17(C ) Alpha: 0.064193 Beta: 0.064134 Total: 0.128327  
# 84: 15(C ) 18(C ) Alpha: 0.066427 Beta: 0.066516 Total: 0.132943  
# 85: 15(C ) 19(F ) Alpha: 0.070037 Beta: 0.070035 Total: 0.140072  
# 86: 15(C ) 28(H ) Alpha: 0.039169 Beta: 0.039166 Total: 0.078335  
# 87: 15(C ) 29(H ) Alpha: 0.430770 Beta: 0.430586 Total: 0.861356  
# 88: 16(C ) 17(C ) Alpha: 0.698553 Beta: 0.698458 Total: 1.397011  
# 89: 16(C ) 18(C ) Alpha: 0.071626 Beta: 0.071668 Total: 0.143294  
# 90: 16(C ) 19(F ) Alpha: 0.681884 Beta: 0.681960 Total: 1.363844  
# 91: 16(C ) 29(H ) Alpha: 0.040926 Beta: 0.040915 Total: 0.081841  
# 92: 16(C ) 30(H ) Alpha: 0.040913 Beta: 0.040899 Total: 0.081811  
# 93: 17(C ) 18(C ) Alpha: 0.728686 Beta: 0.728161 Total: 1.456846  
# 94: 17(C ) 19(F ) Alpha: 0.069971 Beta: 0.069960 Total: 0.139931  
# 95: 17(C ) 30(H ) Alpha: 0.430787 Beta: 0.430578 Total: 0.861366  
# 96: 17(C ) 31(H ) Alpha: 0.039163 Beta: 0.039162 Total: 0.078324  
# 97: 18(C ) 30(H ) Alpha: 0.041192 Beta: 0.041085 Total: 0.082277  
# 98: 18(C ) 31(H ) Alpha: 0.422516 Beta: 0.422581 Total: 0.845097

# 99: 20(C ) 21(C ) Alpha: 0.751261 Beta: 0.740265 Total: 1.491525  
# 100: 20(C ) 22(C ) Alpha: 0.064678 Beta: 0.064388 Total: 0.129067  
# 101: 20(C ) 23(C ) Alpha: 0.067288 Beta: 0.063740 Total: 0.131027  
# 102: 20(C ) 32(H ) Alpha: 0.432326 Beta: 0.432681 Total: 0.865007  
# 103: 20(C ) 33(H ) Alpha: 0.041821 Beta: 0.041602 Total: 0.083423  
# 104: 21(C ) 22(C ) Alpha: 0.706793 Beta: 0.710381 Total: 1.417174  
# 105: 21(C ) 23(C ) Alpha: 0.064758 Beta: 0.065954 Total: 0.130712  
# 106: 21(C ) 32(H ) Alpha: 0.040703 Beta: 0.040550 Total: 0.081253  
# 107: 21(C ) 33(H ) Alpha: 0.437875 Beta: 0.436999 Total: 0.874874  
# 108: 21(C ) 34(H ) Alpha: 0.040305 Beta: 0.040413 Total: 0.080718  
# 109: 22(C ) 23(C ) Alpha: 0.758172 Beta: 0.752959 Total: 1.511132  
# 110: 22(C ) 33(H ) Alpha: 0.040500 Beta: 0.040560 Total: 0.081060  
# 111: 22(C ) 34(H ) Alpha: 0.436293 Beta: 0.436691 Total: 0.872984  
# 112: 22(C ) 35(H ) Alpha: 0.040497 Beta: 0.040379 Total: 0.080877  
# 113: 23(C ) 34(H ) Alpha: 0.042517 Beta: 0.042465 Total: 0.084982  
# 114: 23(C ) 35(H ) Alpha: 0.418083 Beta: 0.417223 Total: 0.835307  
# 115: 24(C ) 25(C ) Alpha: 0.746471 Beta: 0.738308 Total: 1.484779  
# 116: 24(C ) 26(C ) Alpha: 0.063737 Beta: 0.063113 Total: 0.126851  
# 117: 24(C ) 27(C ) Alpha: 0.066325 Beta: 0.063606 Total: 0.129931  
# 118: 24(C ) 36(H ) Alpha: 0.432739 Beta: 0.433549 Total: 0.866288  
# 119: 24(C ) 37(H ) Alpha: 0.041598 Beta: 0.041411 Total: 0.083009  
# 120: 25(C ) 26(C ) Alpha: 0.712171 Beta: 0.705387 Total: 1.417558  
# 121: 25(C ) 27(C ) Alpha: 0.064066 Beta: 0.066116 Total: 0.130182  
# 122: 25(C ) 36(H ) Alpha: 0.040580 Beta: 0.040512 Total: 0.081092  
# 123: 25(C ) 37(H ) Alpha: 0.438759 Beta: 0.437000 Total: 0.875759  
# 124: 25(C ) 38(H ) Alpha: 0.040500 Beta: 0.040449 Total: 0.080949  
# 125: 26(C ) 27(C ) Alpha: 0.756857 Beta: 0.761491 Total: 1.518348  
# 126: 26(C ) 37(H ) Alpha: 0.040508 Beta: 0.040362 Total: 0.080869  
# 127: 26(C ) 38(H ) Alpha: 0.437088 Beta: 0.437813 Total: 0.874901  
# 128: 26(C ) 39(H ) Alpha: 0.040745 Beta: 0.040805 Total: 0.081550  
# 129: 27(C ) 38(H ) Alpha: 0.042237 Beta: 0.042416 Total: 0.084653  
# 130: 27(C ) 39(H ) Alpha: 0.430744 Beta: 0.429148 Total: 0.859892

## 6.23 Wiberg bond orders of 7<sup>•+</sup> extracted by multiwfn (B3LYP/6-311++G<sup>\*\*</sup>, IEFPCM CH<sub>2</sub>Cl<sub>2</sub>)

Bond orders with absolute value >= 0.050000

# 1: 1(C) 2(C) Alpha: 0.776553 Beta: 0.660965 Total: 1.437518  
# 2: 1(C) 3(N) Alpha: 0.055308 Beta: 0.036663 Total: 0.091971  
# 3: 1(C) 5(C) Alpha: 0.032086 Beta: 0.043031 Total: 0.075117  
# 4: 1(C) 6(S) Alpha: 0.588399 Beta: 0.696199 Total: 1.284597  
# 5: 1(C) 20(C) Alpha: 0.597833 Beta: 0.595101 Total: 1.192934  
# 6: 1(C) 21(C) Alpha: 0.052308 Beta: 0.051204 Total: 0.103512  
# 7: 1(C) 22(S) Alpha: 0.080631 Beta: 0.063423 Total: 0.144054  
# 8: 1(C) 23(C) Alpha: 0.042535 Beta: 0.041379 Total: 0.083914  
# 9: 2(C) 3(N) Alpha: 0.594297 Beta: 0.671079 Total: 1.265376  
# 10: 2(C) 4(C) Alpha: 0.040619 Beta: 0.057223 Total: 0.097842  
# 11: 2(C) 6(S) Alpha: 0.055780 Beta: 0.042424 Total: 0.098204  
# 12: 2(C) 7(C) Alpha: 0.039806 Beta: 0.042858 Total: 0.082664  
# 13: 2(C) 20(C) Alpha: 0.060729 Beta: 0.056731 Total: 0.117460  
# 14: 2(C) 21(C) Alpha: 0.056377 Beta: 0.045020 Total: 0.101397  
# 15: 2(C) 22(S) Alpha: 0.636526 Beta: 0.638090 Total: 1.274616  
# 16: 3(N) 4(C) Alpha: 0.594297 Beta: 0.671079 Total: 1.265376  
# 17: 3(N) 5(C) Alpha: 0.055308 Beta: 0.036663 Total: 0.091971  
# 18: 3(N) 6(S) Alpha: 0.014616 Beta: 0.039351 Total: 0.053967  
# 19: 3(N) 7(C) Alpha: 0.508361 Beta: 0.494804 Total: 1.003165  
# 20: 3(N) 8(C) Alpha: 0.036418 Beta: 0.033349 Total: 0.069767  
# 21: 3(N) 12(C) Alpha: 0.036418 Beta: 0.033349 Total: 0.069767  
# 22: 3(N) 15(S) Alpha: 0.035287 Beta: 0.046544 Total: 0.081831  
# 23: 3(N) 22(S) Alpha: 0.035287 Beta: 0.046544 Total: 0.081831  
# 24: 4(C) 5(C) Alpha: 0.776553 Beta: 0.660965 Total: 1.437518  
# 25: 4(C) 6(S) Alpha: 0.055780 Beta: 0.042424 Total: 0.098204  
# 26: 4(C) 7(C) Alpha: 0.039806 Beta: 0.042858 Total: 0.082664  
# 27: 4(C) 13(C) Alpha: 0.056377 Beta: 0.045020 Total: 0.101397  
# 28: 4(C) 14(C) Alpha: 0.060729 Beta: 0.056731 Total: 0.117460  
# 29: 4(C) 15(S) Alpha: 0.636526 Beta: 0.638090 Total: 1.274616



# 30: 5(C ) 6(S ) Alpha: 0.588399 Beta: 0.696199 Total: 1.284598  
# 31: 5(C ) 13(C ) Alpha: 0.052308 Beta: 0.051204 Total: 0.103512  
# 32: 5(C ) 14(C ) Alpha: 0.597833 Beta: 0.595101 Total: 1.192934  
# 33: 5(C ) 15(S ) Alpha: 0.080631 Beta: 0.063423 Total: 0.144054  
# 34: 5(C ) 19(C ) Alpha: 0.042535 Beta: 0.041379 Total: 0.083914  
# 35: 6(S ) 14(C ) Alpha: 0.038041 Beta: 0.042043 Total: 0.080084  
# 36: 6(S ) 20(C ) Alpha: 0.038041 Beta: 0.042043 Total: 0.080084  
# 37: 7(C ) 8(C ) Alpha: 0.699754 Beta: 0.697407 Total: 1.397161  
# 38: 7(C ) 9(C ) Alpha: 0.053977 Beta: 0.054057 Total: 0.108034  
# 39: 7(C ) 10(C ) Alpha: 0.048674 Beta: 0.048663 Total: 0.097337  
# 40: 7(C ) 11(C ) Alpha: 0.053975 Beta: 0.054055 Total: 0.108029  
# 41: 7(C ) 12(C ) Alpha: 0.699751 Beta: 0.697400 Total: 1.397151  
# 42: 7(C ) 27(H ) Alpha: 0.034000 Beta: 0.034018 Total: 0.068018  
# 43: 7(C ) 30(H ) Alpha: 0.033999 Beta: 0.034016 Total: 0.068015  
# 44: 8(C ) 9(C ) Alpha: 0.725329 Beta: 0.724794 Total: 1.450123  
# 45: 8(C ) 10(C ) Alpha: 0.057267 Beta: 0.057306 Total: 0.114572  
# 46: 8(C ) 11(C ) Alpha: 0.052993 Beta: 0.053076 Total: 0.106069  
# 47: 8(C ) 12(C ) Alpha: 0.050761 Beta: 0.050496 Total: 0.101258  
# 48: 8(C ) 27(H ) Alpha: 0.457652 Beta: 0.457659 Total: 0.915311  
# 49: 8(C ) 28(H ) Alpha: 0.034640 Beta: 0.034510 Total: 0.069150  
# 50: 9(C ) 10(C ) Alpha: 0.711270 Beta: 0.711226 Total: 1.422496  
# 51: 9(C ) 11(C ) Alpha: 0.052529 Beta: 0.052451 Total: 0.104980  
# 52: 9(C ) 12(C ) Alpha: 0.052999 Beta: 0.053082 Total: 0.106081  
# 53: 9(C ) 27(H ) Alpha: 0.034298 Beta: 0.034287 Total: 0.068585  
# 54: 9(C ) 28(H ) Alpha: 0.457822 Beta: 0.457659 Total: 0.915481  
# 55: 9(C ) 39(F ) Alpha: 0.045351 Beta: 0.045351 Total: 0.090702  
# 56: 10(C ) 11(C ) Alpha: 0.711281 Beta: 0.711237 Total: 1.422518  
# 57: 10(C ) 12(C ) Alpha: 0.057269 Beta: 0.057308 Total: 0.114578  
# 58: 10(C ) 28(H ) Alpha: 0.035929 Beta: 0.035917 Total: 0.071847  
# 59: 10(C ) 29(H ) Alpha: 0.035929 Beta: 0.035917 Total: 0.071847  
# 60: 10(C ) 39(F ) Alpha: 0.680732 Beta: 0.680816 Total: 1.361548  
# 61: 11(C ) 12(C ) Alpha: 0.725329 Beta: 0.724792 Total: 1.450121  
# 62: 11(C ) 29(H ) Alpha: 0.457821 Beta: 0.457658 Total: 0.915478

# 63: 11(C ) 30(H ) Alpha: 0.034298 Beta: 0.034287 Total: 0.068586  
# 64: 11(C ) 39(F ) Alpha: 0.045352 Beta: 0.045351 Total: 0.090702  
# 65: 12(C ) 29(H ) Alpha: 0.034641 Beta: 0.034510 Total: 0.069151  
# 66: 12(C ) 30(H ) Alpha: 0.457653 Beta: 0.457660 Total: 0.915313  
# 67: 13(C ) 14(C ) Alpha: 0.647980 Beta: 0.645468 Total: 1.293448  
# 68: 13(C ) 15(S ) Alpha: 0.608922 Beta: 0.600106 Total: 1.209028  
# 69: 13(C ) 16(C ) Alpha: 0.708814 Beta: 0.713930 Total: 1.422745  
# 70: 13(C ) 17(C ) Alpha: 0.053808 Beta: 0.054718 Total: 0.108526  
# 71: 13(C ) 18(C ) Alpha: 0.045351 Beta: 0.043849 Total: 0.089201  
# 72: 13(C ) 19(C ) Alpha: 0.045545 Beta: 0.046447 Total: 0.091992  
# 73: 13(C ) 31(H ) Alpha: 0.033899 Beta: 0.034076 Total: 0.067975  
# 74: 14(C ) 15(S ) Alpha: 0.055643 Beta: 0.055060 Total: 0.110704  
# 75: 14(C ) 16(C ) Alpha: 0.047988 Beta: 0.047838 Total: 0.095826  
# 76: 14(C ) 17(C ) Alpha: 0.041425 Beta: 0.040559 Total: 0.081984  
# 77: 14(C ) 18(C ) Alpha: 0.052873 Beta: 0.052765 Total: 0.105638  
# 78: 14(C ) 19(C ) Alpha: 0.667611 Beta: 0.662857 Total: 1.330468  
# 79: 14(C ) 34(H ) Alpha: 0.032935 Beta: 0.032766 Total: 0.065701  
# 80: 15(S ) 16(C ) Alpha: 0.045696 Beta: 0.046004 Total: 0.091700  
# 81: 16(C ) 17(C ) Alpha: 0.738884 Beta: 0.730137 Total: 1.469022  
# 82: 16(C ) 18(C ) Alpha: 0.049629 Beta: 0.048963 Total: 0.098592  
# 83: 16(C ) 19(C ) Alpha: 0.053647 Beta: 0.050757 Total: 0.104404  
# 84: 16(C ) 31(H ) Alpha: 0.457006 Beta: 0.457802 Total: 0.914808  
# 85: 16(C ) 32(H ) Alpha: 0.034814 Beta: 0.034590 Total: 0.069404  
# 86: 17(C ) 18(C ) Alpha: 0.703199 Beta: 0.698034 Total: 1.401234  
# 87: 17(C ) 19(C ) Alpha: 0.050017 Beta: 0.052124 Total: 0.102141  
# 88: 17(C ) 31(H ) Alpha: 0.034036 Beta: 0.033962 Total: 0.067998  
# 89: 17(C ) 32(H ) Alpha: 0.462064 Beta: 0.460333 Total: 0.922396  
# 90: 17(C ) 33(H ) Alpha: 0.033361 Beta: 0.033343 Total: 0.066704  
# 91: 18(C ) 19(C ) Alpha: 0.750329 Beta: 0.753513 Total: 1.503842  
# 92: 18(C ) 32(H ) Alpha: 0.033369 Beta: 0.033230 Total: 0.066599  
# 93: 18(C ) 33(H ) Alpha: 0.460531 Beta: 0.461263 Total: 0.921793  
# 94: 18(C ) 34(H ) Alpha: 0.034901 Beta: 0.034918 Total: 0.069820  
# 95: 19(C ) 33(H ) Alpha: 0.035422 Beta: 0.035583 Total: 0.071005

# 96: 19(C ) 34(H ) Alpha: 0.457362 Beta: 0.455731 Total: 0.913094  
# 97: 20(C ) 21(C ) Alpha: 0.647980 Beta: 0.645468 Total: 1.293448  
# 98: 20(C ) 22(S ) Alpha: 0.055643 Beta: 0.055060 Total: 0.110704  
# 99: 20(C ) 23(C ) Alpha: 0.667611 Beta: 0.662857 Total: 1.330468  
# 100: 20(C ) 24(C ) Alpha: 0.052873 Beta: 0.052765 Total: 0.105638  
# 101: 20(C ) 25(C ) Alpha: 0.041425 Beta: 0.040559 Total: 0.081984  
# 102: 20(C ) 26(C ) Alpha: 0.047988 Beta: 0.047838 Total: 0.095826  
# 103: 20(C ) 35(H ) Alpha: 0.032935 Beta: 0.032766 Total: 0.065701  
# 104: 21(C ) 22(S ) Alpha: 0.608922 Beta: 0.600106 Total: 1.209028  
# 105: 21(C ) 23(C ) Alpha: 0.045545 Beta: 0.046447 Total: 0.091992  
# 106: 21(C ) 24(C ) Alpha: 0.045351 Beta: 0.043849 Total: 0.089201  
# 107: 21(C ) 25(C ) Alpha: 0.053808 Beta: 0.054718 Total: 0.108527  
# 108: 21(C ) 26(C ) Alpha: 0.708814 Beta: 0.713930 Total: 1.422744  
# 109: 21(C ) 38(H ) Alpha: 0.033899 Beta: 0.034076 Total: 0.067975  
# 110: 22(S ) 26(C ) Alpha: 0.045695 Beta: 0.046004 Total: 0.091700  
# 111: 23(C ) 24(C ) Alpha: 0.750329 Beta: 0.753513 Total: 1.503842  
# 112: 23(C ) 25(C ) Alpha: 0.050017 Beta: 0.052124 Total: 0.102141  
# 113: 23(C ) 26(C ) Alpha: 0.053647 Beta: 0.050757 Total: 0.104404  
# 114: 23(C ) 35(H ) Alpha: 0.457362 Beta: 0.455731 Total: 0.913094  
# 115: 23(C ) 36(H ) Alpha: 0.035422 Beta: 0.035583 Total: 0.071005  
# 116: 24(C ) 25(C ) Alpha: 0.703199 Beta: 0.698034 Total: 1.401233  
# 117: 24(C ) 26(C ) Alpha: 0.049629 Beta: 0.048963 Total: 0.098592  
# 118: 24(C ) 35(H ) Alpha: 0.034901 Beta: 0.034918 Total: 0.069820  
# 119: 24(C ) 36(H ) Alpha: 0.460531 Beta: 0.461263 Total: 0.921793  
# 120: 24(C ) 37(H ) Alpha: 0.033369 Beta: 0.033230 Total: 0.066599  
# 121: 25(C ) 26(C ) Alpha: 0.738885 Beta: 0.730138 Total: 1.469023  
# 122: 25(C ) 36(H ) Alpha: 0.033361 Beta: 0.033343 Total: 0.066704  
# 123: 25(C ) 37(H ) Alpha: 0.462063 Beta: 0.460333 Total: 0.922396  
# 124: 25(C ) 38(H ) Alpha: 0.034036 Beta: 0.033962 Total: 0.067998  
# 125: 26(C ) 37(H ) Alpha: 0.034814 Beta: 0.034591 Total: 0.069404  
# 126: 26(C ) 38(H ) Alpha: 0.457006 Beta: 0.457802 Total: 0.914808

6.24 Computed xyz-coordinates and GIAO nuclear magnetic shielding tensors of NICS(0) calculation of compound  $5^{2+}$  (Bq = ghost atom, B3LYP/6-311+G\*\*)

Charge = 2 Multiplicity = 1

|   |   |          |          |          |
|---|---|----------|----------|----------|
| C | 0 | 1.31222  | 2.16806  | 0.00008  |
| C | 0 | 1.22095  | 0.74156  | -0.00002 |
| N | 0 | -0.00002 | 0.1142   | 0.00000  |
| C | 0 | -1.22103 | 0.74148  | 0.00002  |
| C | 0 | -1.31239 | 2.16798  | -0.00008 |
| S | 0 | -0.00012 | 3.24341  | 0.00000  |
| C | 0 | -2.54542 | 0.13881  | 0.00009  |
| C | 0 | -3.54865 | 1.14093  | -0.00006 |
| S | 0 | -2.91116 | 2.78037  | -0.00021 |
| S | 0 | 2.91097  | 2.78055  | 0.00021  |
| C | 0 | 3.54855  | 1.14114  | 0.00006  |
| C | 0 | 2.54537  | 0.13897  | -0.00009 |
| C | 0 | 0.00005  | -1.34835 | 0.00000  |
| C | 0 | 4.90767  | 0.86524  | 0.00006  |
| C | 0 | 5.30128  | -0.4692  | -0.00013 |
| C | 0 | 4.34354  | -1.4884  | -0.00032 |
| C | 0 | 2.98754  | -1.20448 | -0.00029 |
| C | 0 | -2.98753 | -1.20466 | 0.00029  |
| C | 0 | -4.34351 | -1.48865 | 0.00032  |
| C | 0 | -5.30131 | -0.4695  | 0.00012  |
| C | 0 | -4.90776 | 0.86496  | -0.00006 |
| C | 0 | 0.00028  | -2.01526 | 1.22084  |
| C | 0 | 0.00035  | -3.40642 | 1.22055  |
| C | 0 | 0.00021  | -4.0698  | 0.00000  |
| C | 0 | -0.00001 | -3.40642 | -1.22055 |
| C | 0 | -0.00009 | -2.01526 | -1.22084 |
| F | 0 | 0.00028  | -5.41493 | 0.00000  |
| H | 0 | 5.63966  | 1.66314  | 0.00019  |

|    |   |          |          |          |
|----|---|----------|----------|----------|
| H  | 0 | 6.35593  | -0.71464 | -0.00014 |
| H  | 0 | 4.66135  | -2.52309 | -0.00049 |
| H  | 0 | 2.29657  | -2.0274  | -0.00045 |
| H  | 0 | -2.29652 | -2.02755 | 0.00045  |
| H  | 0 | -4.66127 | -2.52335 | 0.00048  |
| H  | 0 | -6.35594 | -0.71499 | 0.00013  |
| H  | 0 | -5.63979 | 1.66282  | -0.0002  |
| H  | 0 | 0.00038  | -1.46488 | 2.15326  |
| H  | 0 | 0.00052  | -3.96792 | 2.14536  |
| H  | 0 | -0.00011 | -3.96792 | -2.14536 |
| H  | 0 | -0.00024 | -1.46488 | -2.15326 |
| Bq | 0 | -0.00006 | 1.52945  | 0.00000  |
| Bq | 0 | -2.30773 | 1.39392  | -0.00005 |
| Bq | 0 | 2.30761  | 1.39406  | 0.00005  |
| Bq | 0 | -3.93903 | -0.16969 | 0.00012  |
| Bq | 0 | 3.93899  | -0.16945 | -0.00012 |

Calculating GIAO nuclear magnetic shielding tensors.

SCF GIAO Magnetic shielding tensor (ppm):

1 C Isotropic = 8.6242 Anisotropy = 187.2544

XX= -33.1425 YX= 2.0694 ZX= -0.0141

XY= 0.4810 YY= -74.4453 ZY= -0.0077

XZ= 0.0001 YZ= -0.0095 ZZ= 133.4605

Eigenvalues: -74.4847 -33.1032 133.4605

2 C Isotropic = 34.1300 Anisotropy = 124.7825

XX= -10.3885 YX= 8.4820 ZX= 0.0071

XY= 6.4837 YY= -4.5398 ZY= -0.0065

XZ= -0.0001 YZ= -0.0059 ZZ= 117.3183

Eigenvalues: -15.4981 0.5698 117.3183

3 N Isotropic = 28.5597 Anisotropy = 226.1142

XX= -40.6105 YX= 0.0004 ZX= 0.0064

XY= 0.0022 YY= -53.0129 ZY= -0.0000

XZ= 0.0056 YZ= -0.0001 ZZ= 179.3025

Eigenvalues: -53.0129 -40.6105 179.3025

4 C Isotropic = 34.1301 Anisotropy = 124.7822  
XX= -10.3872 YX= -8.4813 ZX= 0.0070  
XY= -6.4834 YY= -4.5406 ZY= 0.0064  
XZ= -0.0001 YZ= 0.0057 ZZ= 117.3183  
Eigenvalues: -15.4971 0.5692 117.3183

5 C Isotropic = 8.6239 Anisotropy = 187.2538  
XX= -33.1436 YX= -2.0672 ZX= -0.0140  
XY= -0.4778 YY= -74.4445 ZY= 0.0075  
XZ= 0.0001 YZ= 0.0092 ZZ= 133.4597  
Eigenvalues: -74.4837 -33.1044 133.4597

6 S Isotropic = 169.5480 Anisotropy = 506.6246  
XX= 65.0317 YX= 0.0035 ZX= -0.0314  
XY= 0.0089 YY= -63.6854 ZY= -0.0001  
XZ= -0.0504 YZ= 0.0001 ZZ= 507.2977  
Eigenvalues: -63.6854 65.0316 507.2977

7 C Isotropic = 53.0795 Anisotropy = 140.4270  
XX= -23.4751 YX= -5.4889 ZX= 0.0007  
XY= -6.4631 YY= 36.0161 ZY= 0.0172  
XZ= -0.0099 YZ= 0.0128 ZZ= 146.6975  
Eigenvalues: -24.0695 36.6105 146.6975

8 C Isotropic = 33.4447 Anisotropy = 133.2856  
XX= 19.8152 YX= -14.7625 ZX= -0.0040  
XY= -13.9488 YY= -41.7829 ZY= 0.0172  
XZ= 0.0137 YZ= 0.0150 ZZ= 122.3018  
Eigenvalues: -44.9642 22.9966 122.3018

9 S Isotropic = 216.3211 Anisotropy = 247.2318  
XX= 270.1146 YX= 33.8050 ZX= -0.0060  
XY= 22.5303 YY= -2.2937 ZY= 0.0345  
XZ= 0.0009 YZ= 0.0107 ZZ= 381.1422  
Eigenvalues: -5.1758 272.9967 381.1422

10 S Isotropic = 216.3197 Anisotropy = 247.2272  
XX= 270.1166 YX= -33.7865 ZX= -0.0060  
XY= -22.5124 YY= -2.2953 ZY= -0.0349  
S178

XZ= 0.0011 YZ= -0.0110 ZZ= 381.1378

Eigenvalues: -5.1737 272.9950 381.1378

11 C Isotropic = 33.4448 Anisotropy = 133.2842

XX= 19.8148 YX= 14.7654 ZX= -0.0040

XY= 13.9535 YY= -41.7813 ZY= -0.0175

XZ= 0.0139 YZ= -0.0153 ZZ= 122.3010

Eigenvalues: -44.9644 22.9979 122.3010

12 C Isotropic = 53.0799 Anisotropy = 140.4251

XX= -23.4755 YX= 5.4874 ZX= 0.0007

XY= 6.4590 YY= 36.0186 ZY= -0.0173

XZ= -0.0098 YZ= -0.0129 ZZ= 146.6966

Eigenvalues: -24.0693 36.6124 146.6966

13 C Isotropic = 42.0407 Anisotropy = 109.2846

XX= 114.8971 YX= 0.0097 ZX= -0.0061

XY= 0.0092 YY= -56.2555 ZY= 0.0001

XZ= -0.0092 YZ= -0.0000 ZZ= 67.4805

Eigenvalues: -56.2555 67.4805 114.8971

14 C Isotropic = 50.8192 Anisotropy = 181.0659

XX= -10.8204 YX= -38.8240 ZX= -0.0108

XY= -37.6150 YY= -8.2518 ZY= -0.0264

XZ= -0.0082 YZ= -0.0237 ZZ= 171.5298

Eigenvalues: -47.7771 28.7050 171.5298

15 C Isotropic = 32.5389 Anisotropy = 215.2410

XX= -72.0932 YX= 17.8435 ZX= -0.0043

XY= 11.8839 YY= -6.3231 ZY= -0.0280

XZ= -0.0036 YZ= -0.0316 ZZ= 176.0328

Eigenvalues: -75.2963 -3.1199 176.0328

16 C Isotropic = 44.7228 Anisotropy = 198.8607

XX= 17.8056 YX= 22.7231 ZX= 0.0002

XY= 22.3566 YY= -60.9338 ZY= -0.0391

XZ= 0.0018 YZ= -0.0359 ZZ= 177.2966

Eigenvalues: -66.9295 23.8013 177.2966

17 C Isotropic = 45.2898 Anisotropy = 187.3520

XX= 4.4418 YX= -32.4804 ZX= -0.0110  
XY= -24.0553 YY= -38.7636 ZY= -0.0353  
XZ= -0.0156 YZ= -0.0307 ZZ= 170.1911  
Eigenvalues: -52.7382 18.4165 170.1911

18 C Isotropic = 45.2912 Anisotropy = 187.3534

XX= 4.4393 YX= 32.4834 ZX= -0.0111  
XY= 24.0578 YY= -38.7591 ZY= 0.0352  
XZ= -0.0158 YZ= 0.0305 ZZ= 170.1935  
Eigenvalues: -52.7373 18.4175 170.1935

19 C Isotropic = 44.7224 Anisotropy = 198.8607

XX= 17.8080 YX= -22.7195 ZX= 0.0001  
XY= -22.3525 YY= -60.9370 ZY= 0.0389  
XZ= 0.0016 YZ= 0.0357 ZZ= 177.2961  
Eigenvalues: -66.9304 23.8014 177.2962

20 C Isotropic = 32.5391 Anisotropy = 215.2415

XX= -72.0918 YX= -17.8465 ZX= -0.0045  
XY= -11.8868 YY= -6.3243 ZY= 0.0279  
XZ= -0.0037 YZ= 0.0315 ZZ= 176.0334  
Eigenvalues: -75.2962 -3.1198 176.0334

21 C Isotropic = 50.8193 Anisotropy = 181.0662

XX= -10.8249 YX= 38.8249 ZX= -0.0109  
XY= 37.6153 YY= -8.2472 ZY= 0.0262  
XZ= -0.0083 YZ= 0.0236 ZZ= 171.5301  
Eigenvalues: -47.7779 28.7057 171.5301

22 C Isotropic = 55.5242 Anisotropy = 168.0419

XX= 167.5521 YX= 0.0035 ZX= -0.0260  
XY= 0.0059 YY= 17.3872 ZY= -30.0529  
XZ= -0.0264 YZ= -14.9487 ZZ= -18.3668  
Eigenvalues: -29.2278 28.2482 167.5521

23 C Isotropic = 51.0896 Anisotropy = 174.9540

XX= 167.7256 YX= 0.0131 ZX= -0.0278  
XY= 0.0120 YY= 11.6454 ZY= 27.2136  
XZ= -0.0295 YZ= 20.2064 ZZ= -26.1022



Eigenvalues: -37.5333 23.0765 167.7256

24 C Isotropic = 4.8956 Anisotropy = 119.4877

XX= 84.5540 YX= 0.0080 ZX= -0.0100

XY= 0.0091 YY= -81.0886 ZY= -0.0000

XZ= -0.0106 YZ= -0.0000 ZZ= 11.2213

Eigenvalues: -81.0886 11.2213 84.5540

25 C Isotropic = 51.0897 Anisotropy = 174.9539

XX= 167.7257 YX= 0.0047 ZX= -0.0247

XY= 0.0054 YY= 11.6454 ZY= -27.2137

XZ= -0.0264 YZ= -20.2064 ZZ= -26.1018

Eigenvalues: -37.5330 23.0765 167.7257

26 C Isotropic = 55.5243 Anisotropy = 168.0420

XX= 167.5523 YX= 0.0136 ZX= -0.0296

XY= 0.0111 YY= 17.3873 ZY= 30.0528

XZ= -0.0259 YZ= 14.9488 ZZ= -18.3666

Eigenvalues: -29.2276 28.2483 167.5523

27 F Isotropic = 249.6607 Anisotropy = 151.1915

XX= 350.4551 YX= 0.0049 ZX= -0.0302

XY= 0.0052 YY= 254.7321 ZY= 0.0000

XZ= -0.0307 YZ= -0.0001 ZZ= 143.7951

Eigenvalues: 143.7951 254.7321 350.4551

28 H Isotropic = 23.4031 Anisotropy = 8.1994

XX= 27.7961 YX= -2.1996 ZX= -0.0001

XY= -2.2052 YY= 24.3500 ZY= 0.0004

XZ= -0.0000 YZ= 0.0008 ZZ= 18.0632

Eigenvalues: 18.0632 23.2767 28.8693

29 H Isotropic = 23.1534 Anisotropy = 5.3074

XX= 23.8742 YX= 0.8495 ZX= 0.0003

XY= 0.6131 YY= 26.5019 ZY= 0.0011

XZ= 0.0001 YZ= 0.0009 ZZ= 19.0842

Eigenvalues: 19.0842 23.6844 26.6917

30 H Isotropic = 23.8128 Anisotropy = 8.8338

XX= 29.6233 YX= 0.8638 ZX= 0.0001

XY= 0.5840 YY= 23.0437 ZY= 0.0002  
XZ= -0.0006 YZ= 0.0010 ZZ= 18.7714

Eigenvalues: 18.7714 22.9650 29.7020

31 H Isotropic = 25.3600 Anisotropy = 18.1124

XX= 37.4239 YX= 1.2592 ZX= -0.0026

XY= -2.0452 YY= 23.4164 ZY= 0.0004

XZ= -0.0023 YZ= 0.0006 ZZ= 15.2397

Eigenvalues: 15.2397 23.4054 37.4350

32 H Isotropic = 25.3596 Anisotropy = 18.1112

XX= 37.4226 YX= -1.2578 ZX= -0.0026

XY= 2.0463 YY= 23.4163 ZY= -0.0004

XZ= -0.0022 YZ= -0.0006 ZZ= 15.2397

Eigenvalues: 15.2397 23.4052 37.4337

33 H Isotropic = 23.8127 Anisotropy = 8.8335

XX= 29.6231 YX= -0.8635 ZX= 0.0001

XY= -0.5835 YY= 23.0437 ZY= -0.0002

XZ= -0.0006 YZ= -0.0010 ZZ= 18.7713

Eigenvalues: 18.7713 22.9651 29.7017

34 H Isotropic = 23.1534 Anisotropy = 5.3074

XX= 23.8743 YX= -0.8496 ZX= 0.0003

XY= -0.6131 YY= 26.5019 ZY= -0.0011

XZ= 0.0001 YZ= -0.0009 ZZ= 19.0842

Eigenvalues: 19.0842 23.6844 26.6917

35 H Isotropic = 23.4031 Anisotropy = 8.1995

XX= 27.7959 YX= 2.1999 ZX= -0.0001

XY= 2.2054 YY= 24.3502 ZY= -0.0004

XZ= -0.0000 YZ= -0.0008 ZZ= 18.0633

Eigenvalues: 18.0633 23.2767 28.8694

36 H Isotropic = 24.2921 Anisotropy = 8.6556

XX= 21.8309 YX= -0.0006 ZX= 0.0004

XY= 0.0002 YY= 26.6324 ZY= -2.4213

XZ= 0.0002 YZ= -6.3828 ZZ= 24.4130

Eigenvalues: 20.9830 21.8309 30.0625

37 H Isotropic = 23.4843 Anisotropy = 4.4620  
XX= 21.0119 YX= -0.0001 ZX= 0.0004  
XY= 0.0001 YY= 26.4563 ZY= 1.1252  
XZ= 0.0001 YZ= -0.9303 ZZ= 22.9848  
Eigenvalues: 21.0119 22.9820 26.4590

38 H Isotropic = 23.4843 Anisotropy = 4.4620  
XX= 21.0120 YX= -0.0004 ZX= 0.0006  
XY= -0.0008 YY= 26.4563 ZY= -1.1252  
XZ= 0.0004 YZ= 0.9303 ZZ= 22.9848  
Eigenvalues: 21.0120 22.9821 26.4590

39 H Isotropic = 24.2921 Anisotropy = 8.6556  
XX= 21.8309 YX= -0.0002 ZX= 0.0002  
XY= -0.0009 YY= 26.6324 ZY= 2.4213  
XZ= 0.0002 YZ= 6.3828 ZZ= 24.4130  
Eigenvalues: 20.9830 21.8309 30.0625

40 Bq Isotropic = 6.9440 Anisotropy = 11.8768  
XX= 4.7986 YX= -0.0003 ZX= 0.0004  
XY= -0.0002 YY= 14.8619 ZY= 0.0000  
XZ= 0.0003 YZ= 0.0000 ZZ= 1.1716  
Eigenvalues: 1.1716 4.7986 14.8619

41 Bq Isotropic = 7.2871 Anisotropy = 25.7166  
XX= 11.2883 YX= -5.0502 ZX= 0.0013  
XY= -4.4695 YY= 22.7077 ZY= -0.0041  
XZ= 0.0019 YZ= -0.0027 ZZ= -12.1347  
Eigenvalues: -12.1347 9.5645 24.4315

42 Bq Isotropic = 7.2870 Anisotropy = 25.7168  
XX= 11.2878 YX= 5.0495 ZX= 0.0013  
XY= 4.4691 YY= 22.7082 ZY= 0.0042  
XZ= 0.0019 YZ= 0.0028 ZZ= -12.1349  
Eigenvalues: -12.1350 9.5645 24.4316

43 Bq Isotropic = 8.1576 Anisotropy = 1.9350  
XX= 7.7336 YX= -1.2716 ZX= 0.0000  
XY= 0.4783 YY= 7.2917 ZY= -0.0003

XZ= -0.0010 YZ= 0.0005 ZZ= 9.4476

Eigenvalues: 7.0586 7.9667 9.4476

44 Bq Isotropic = 8.1576 Anisotropy = 1.9348

XX= 7.7337 YX= 1.2717 ZX= 0.0000

XY= -0.4782 YY= 7.2917 ZY= 0.0003

XZ= -0.0010 YZ= -0.0005 ZZ= 9.4474

Eigenvalues: 7.0585 7.9668 9.4474

## 6.25 Computed xyz-coordinates and GIAO nuclear magnetic shielding tensors of NICS(1) calculation of compound **6**<sup>2+</sup> (Bq = ghost atom, B3LYP/6-311+G<sup>\*\*</sup>)

Charge = 2 Multiplicity = 1

|   |   |          |          |          |
|---|---|----------|----------|----------|
| C | 0 | 1.31222  | 2.16806  | 0.00008  |
| C | 0 | 1.22095  | 0.74156  | -0.00002 |
| N | 0 | -0.00002 | 0.1142   | 0.       |
| C | 0 | -1.22103 | 0.74148  | 0.00002  |
| C | 0 | -1.31239 | 2.16798  | -0.00008 |
| S | 0 | -0.00012 | 3.24341  | 0.       |
| C | 0 | -2.54542 | 0.13881  | 0.00009  |
| C | 0 | -3.54865 | 1.14093  | -0.00006 |
| S | 0 | -2.91116 | 2.78037  | -0.00021 |
| S | 0 | 2.91097  | 2.78055  | 0.00021  |
| C | 0 | 3.54855  | 1.14114  | 0.00006  |
| C | 0 | 2.54537  | 0.13897  | -0.00009 |
| C | 0 | 0.00005  | -1.34835 | 0.       |
| C | 0 | 4.90767  | 0.86524  | 0.00006  |
| C | 0 | 5.30128  | -0.4692  | -0.00013 |
| C | 0 | 4.34354  | -1.4884  | -0.00032 |
| C | 0 | 2.98754  | -1.20448 | -0.00029 |
| C | 0 | -2.98753 | -1.20466 | 0.00029  |
| C | 0 | -4.34351 | -1.48865 | 0.00032  |
| C | 0 | -5.30131 | -0.4695  | 0.00012  |

|    |   |          |          |          |
|----|---|----------|----------|----------|
| C  | 0 | -4.90776 | 0.86496  | -0.00006 |
| C  | 0 | 0.00028  | -2.01526 | 1.22084  |
| C  | 0 | 0.00035  | -3.40642 | 1.22055  |
| C  | 0 | 0.00021  | -4.0698  | 0.       |
| C  | 0 | -0.00001 | -3.40642 | -1.22055 |
| C  | 0 | -0.00009 | -2.01526 | -1.22084 |
| F  | 0 | 0.00028  | -5.41493 | 0.       |
| H  | 0 | 5.63966  | 1.66314  | 0.00019  |
| H  | 0 | 6.35593  | -0.71464 | -0.00014 |
| H  | 0 | 4.66135  | -2.52309 | -0.00049 |
| H  | 0 | 2.29657  | -2.0274  | -0.00045 |
| H  | 0 | -2.29652 | -2.02755 | 0.00045  |
| H  | 0 | -4.66127 | -2.52335 | 0.00048  |
| H  | 0 | -6.35594 | -0.71499 | 0.00013  |
| H  | 0 | -5.63979 | 1.66282  | -0.0002  |
| H  | 0 | 0.00038  | -1.46488 | 2.15326  |
| H  | 0 | 0.00052  | -3.96792 | 2.14536  |
| H  | 0 | -0.00011 | -3.96792 | -2.14536 |
| H  | 0 | -0.00024 | -1.46488 | -2.15326 |
| Bq | 0 | -0.00005 | 1.52945  | 1.       |
| Bq | 0 | -2.30776 | 1.39403  | 0.99995  |
| Bq | 0 | 2.30758  | 1.39394  | 1.00005  |
| Bq | 0 | -3.93904 | -0.16955 | 1.00012  |
| Bq | 0 | 3.93898  | -0.16959 | 0.99988  |

Calculating GIAO nuclear magnetic shielding tensors.

SCF GIAO Magnetic shielding tensor (ppm):

1 C Isotropic = 8.6242 Anisotropy = 187.2544

XX= -33.1425 YX= 2.0694 ZX= -0.0141

XY= 0.4810 YY= -74.4453 ZY= -0.0077

XZ= 0.0001 YZ= -0.0095 ZZ= 133.4605

Eigenvalues: -74.4847 -33.1032 133.4605

2 C Isotropic = 34.1300 Anisotropy = 124.7825

XX= -10.3885 YX= 8.4820 ZX= 0.0071

S185

XY= 6.4837 YY= -4.5398 ZY= -0.0065  
XZ= -0.0001 YZ= -0.0059 ZZ= 117.3183

Eigenvalues: -15.4981 0.5698 117.3183

3 N Isotropic = 28.5597 Anisotropy = 226.1142

XX= -40.6105 YX= 0.0004 ZX= 0.0064  
XY= 0.0022 YY= -53.0129 ZY= -0.0000  
XZ= 0.0056 YZ= -0.0001 ZZ= 179.3025

Eigenvalues: -53.0129 -40.6105 179.3025

4 C Isotropic = 34.1301 Anisotropy = 124.7822

XX= -10.3872 YX= -8.4813 ZX= 0.0070  
XY= -6.4834 YY= -4.5406 ZY= 0.0064  
XZ= -0.0001 YZ= 0.0057 ZZ= 117.3183

Eigenvalues: -15.4971 0.5692 117.3183

5 C Isotropic = 8.6239 Anisotropy = 187.2538

XX= -33.1436 YX= -2.0672 ZX= -0.0140  
XY= -0.4778 YY= -74.4445 ZY= 0.0075  
XZ= 0.0001 YZ= 0.0092 ZZ= 133.4597

Eigenvalues: -74.4837 -33.1044 133.4597

6 S Isotropic = 169.5480 Anisotropy = 506.6246

XX= 65.0317 YX= 0.0035 ZX= -0.0314  
XY= 0.0089 YY= -63.6854 ZY= -0.0001  
XZ= -0.0504 YZ= 0.0001 ZZ= 507.2977

Eigenvalues: -63.6854 65.0316 507.2977

7 C Isotropic = 53.0795 Anisotropy = 140.4270

XX= -23.4751 YX= -5.4889 ZX= 0.0007  
XY= -6.4631 YY= 36.0161 ZY= 0.0172  
XZ= -0.0099 YZ= 0.0128 ZZ= 146.6975

Eigenvalues: -24.0695 36.6105 146.6975

8 C Isotropic = 33.4447 Anisotropy = 133.2856

XX= 19.8152 YX= -14.7625 ZX= -0.0040  
XY= -13.9488 YY= -41.7829 ZY= 0.0172  
XZ= 0.0137 YZ= 0.0150 ZZ= 122.3018

Eigenvalues: -44.9642 22.9966 122.3018

9 S Isotropic = 216.3211 Anisotropy = 247.2318  
XX= 270.1146 YX= 33.8050 ZX= -0.0060  
XY= 22.5303 YY= -2.2937 ZY= 0.0345  
XZ= 0.0009 YZ= 0.0107 ZZ= 381.1422  
Eigenvalues: -5.1758 272.9967 381.1422

10 S Isotropic = 216.3197 Anisotropy = 247.2272  
XX= 270.1166 YX= -33.7865 ZX= -0.0060  
XY= -22.5124 YY= -2.2953 ZY= -0.0349  
XZ= 0.0011 YZ= -0.0110 ZZ= 381.1378  
Eigenvalues: -5.1737 272.9950 381.1378

11 C Isotropic = 33.4448 Anisotropy = 133.2842  
XX= 19.8148 YX= 14.7654 ZX= -0.0040  
XY= 13.9535 YY= -41.7813 ZY= -0.0175  
XZ= 0.0139 YZ= -0.0153 ZZ= 122.3010  
Eigenvalues: -44.9644 22.9979 122.3010

12 C Isotropic = 53.0799 Anisotropy = 140.4251  
XX= -23.4755 YX= 5.4874 ZX= 0.0007  
XY= 6.4590 YY= 36.0186 ZY= -0.0173  
XZ= -0.0098 YZ= -0.0129 ZZ= 146.6966  
Eigenvalues: -24.0693 36.6124 146.6966

13 C Isotropic = 42.0407 Anisotropy = 109.2846  
XX= 114.8971 YX= 0.0097 ZX= -0.0061  
XY= 0.0092 YY= -56.2555 ZY= 0.0001  
XZ= -0.0092 YZ= -0.0000 ZZ= 67.4805  
Eigenvalues: -56.2555 67.4805 114.8971

14 C Isotropic = 50.8192 Anisotropy = 181.0659  
XX= -10.8204 YX= -38.8240 ZX= -0.0108  
XY= -37.6150 YY= -8.2518 ZY= -0.0264  
XZ= -0.0082 YZ= -0.0237 ZZ= 171.5298  
Eigenvalues: -47.7771 28.7050 171.5298

15 C Isotropic = 32.5389 Anisotropy = 215.2410  
XX= -72.0932 YX= 17.8435 ZX= -0.0043  
XY= 11.8839 YY= -6.3231 ZY= -0.0280  
Eigenvalues: -66.2555 67.4805 114.8971

XZ= -0.0036 YZ= -0.0316 ZZ= 176.0328

Eigenvalues: -75.2963 -3.1199 176.0328

16 C Isotropic = 44.7228 Anisotropy = 198.8607

XX= 17.8056 YX= 22.7231 ZX= 0.0002

XY= 22.3566 YY= -60.9338 ZY= -0.0391

XZ= 0.0018 YZ= -0.0359 ZZ= 177.2966

Eigenvalues: -66.9295 23.8013 177.2966

17 C Isotropic = 45.2898 Anisotropy = 187.3520

XX= 4.4418 YX= -32.4804 ZX= -0.0110

XY= -24.0553 YY= -38.7636 ZY= -0.0353

XZ= -0.0156 YZ= -0.0307 ZZ= 170.1911

Eigenvalues: -52.7382 18.4165 170.1911

18 C Isotropic = 45.2912 Anisotropy = 187.3534

XX= 4.4393 YX= 32.4834 ZX= -0.0111

XY= 24.0578 YY= -38.7591 ZY= 0.0352

XZ= -0.0158 YZ= 0.0305 ZZ= 170.1935

Eigenvalues: -52.7373 18.4175 170.1935

19 C Isotropic = 44.7224 Anisotropy = 198.8607

XX= 17.8080 YX= -22.7195 ZX= 0.0001

XY= -22.3525 YY= -60.9370 ZY= 0.0389

XZ= 0.0016 YZ= 0.0357 ZZ= 177.2961

Eigenvalues: -66.9304 23.8014 177.2962

20 C Isotropic = 32.5391 Anisotropy = 215.2415

XX= -72.0918 YX= -17.8465 ZX= -0.0045

XY= -11.8868 YY= -6.3243 ZY= 0.0279

XZ= -0.0037 YZ= 0.0315 ZZ= 176.0334

Eigenvalues: -75.2962 -3.1198 176.0334

21 C Isotropic = 50.8193 Anisotropy = 181.0662

XX= -10.8249 YX= 38.8249 ZX= -0.0109

XY= 37.6153 YY= -8.2472 ZY= 0.0262

XZ= -0.0083 YZ= 0.0236 ZZ= 171.5301

Eigenvalues: -47.7779 28.7057 171.5301

22 C Isotropic = 55.5242 Anisotropy = 168.0419



XX= 167.5521 YX= 0.0035 ZX= -0.0260  
XY= 0.0059 YY= 17.3872 ZY= -30.0529  
XZ= -0.0264 YZ= -14.9487 ZZ= -18.3668  
Eigenvalues: -29.2278 28.2482 167.5521

23 C Isotropic = 51.0896 Anisotropy = 174.9540

XX= 167.7256 YX= 0.0131 ZX= -0.0278  
XY= 0.0120 YY= 11.6454 ZY= 27.2136  
XZ= -0.0295 YZ= 20.2064 ZZ= -26.1022  
Eigenvalues: -37.5333 23.0765 167.7256

24 C Isotropic = 4.8956 Anisotropy = 119.4877

XX= 84.5540 YX= 0.0080 ZX= -0.0100  
XY= 0.0091 YY= -81.0886 ZY= -0.0000  
XZ= -0.0106 YZ= -0.0000 ZZ= 11.2213  
Eigenvalues: -81.0886 11.2213 84.5540

25 C Isotropic = 51.0897 Anisotropy = 174.9539

XX= 167.7257 YX= 0.0047 ZX= -0.0247  
XY= 0.0054 YY= 11.6454 ZY= -27.2137  
XZ= -0.0264 YZ= -20.2064 ZZ= -26.1018  
Eigenvalues: -37.5330 23.0765 167.7257

26 C Isotropic = 55.5243 Anisotropy = 168.0420

XX= 167.5523 YX= 0.0136 ZX= -0.0296  
XY= 0.0111 YY= 17.3873 ZY= 30.0528  
XZ= -0.0259 YZ= 14.9488 ZZ= -18.3666  
Eigenvalues: -29.2276 28.2483 167.5523

27 F Isotropic = 249.6607 Anisotropy = 151.1915

XX= 350.4551 YX= 0.0049 ZX= -0.0302  
XY= 0.0052 YY= 254.7321 ZY= 0.0000  
XZ= -0.0307 YZ= -0.0001 ZZ= 143.7951  
Eigenvalues: 143.7951 254.7321 350.4551

28 H Isotropic = 23.4031 Anisotropy = 8.1994

XX= 27.7961 YX= -2.1996 ZX= -0.0001  
XY= -2.2052 YY= 24.3500 ZY= 0.0004  
XZ= -0.0000 YZ= 0.0008 ZZ= 18.0632

Eigenvalues: 18.0632 23.2767 28.8693

29 H Isotropic = 23.1534 Anisotropy = 5.3074

XX= 23.8742 YX= 0.8495 ZX= 0.0003

XY= 0.6131 YY= 26.5019 ZY= 0.0011

XZ= 0.0001 YZ= 0.0009 ZZ= 19.0842

Eigenvalues: 19.0842 23.6844 26.6917

30 H Isotropic = 23.8128 Anisotropy = 8.8338

XX= 29.6233 YX= 0.8638 ZX= 0.0001

XY= 0.5840 YY= 23.0437 ZY= 0.0002

XZ= -0.0006 YZ= 0.0010 ZZ= 18.7714

Eigenvalues: 18.7714 22.9650 29.7020

31 H Isotropic = 25.3600 Anisotropy = 18.1124

XX= 37.4239 YX= 1.2592 ZX= -0.0026

XY= -2.0452 YY= 23.4164 ZY= 0.0004

XZ= -0.0023 YZ= 0.0006 ZZ= 15.2397

Eigenvalues: 15.2397 23.4054 37.4350

32 H Isotropic = 25.3596 Anisotropy = 18.1112

XX= 37.4226 YX= -1.2578 ZX= -0.0026

XY= 2.0463 YY= 23.4163 ZY= -0.0004

XZ= -0.0022 YZ= -0.0006 ZZ= 15.2397

Eigenvalues: 15.2397 23.4052 37.4337

33 H Isotropic = 23.8127 Anisotropy = 8.8335

XX= 29.6231 YX= -0.8635 ZX= 0.0001

XY= -0.5835 YY= 23.0437 ZY= -0.0002

XZ= -0.0006 YZ= -0.0010 ZZ= 18.7713

Eigenvalues: 18.7713 22.9651 29.7017

34 H Isotropic = 23.1534 Anisotropy = 5.3074

XX= 23.8743 YX= -0.8496 ZX= 0.0003

XY= -0.6131 YY= 26.5019 ZY= -0.0011

XZ= 0.0001 YZ= -0.0009 ZZ= 19.0842

Eigenvalues: 19.0842 23.6844 26.6917

35 H Isotropic = 23.4031 Anisotropy = 8.1995

XX= 27.7959 YX= 2.1999 ZX= -0.0001

XY= 2.2054 YY= 24.3502 ZY= -0.0004  
XZ= -0.0000 YZ= -0.0008 ZZ= 18.0633  
Eigenvalues: 18.0633 23.2767 28.8694

36 H Isotropic = 24.2921 Anisotropy = 8.6556

XX= 21.8309 YX= -0.0006 ZX= 0.0004  
XY= 0.0002 YY= 26.6324 ZY= -2.4213  
XZ= 0.0002 YZ= -6.3828 ZZ= 24.4130  
Eigenvalues: 20.9830 21.8309 30.0625

37 H Isotropic = 23.4843 Anisotropy = 4.4620

XX= 21.0119 YX= -0.0001 ZX= 0.0004  
XY= 0.0001 YY= 26.4563 ZY= 1.1252  
XZ= 0.0001 YZ= -0.9303 ZZ= 22.9848  
Eigenvalues: 21.0119 22.9820 26.4590

38 H Isotropic = 23.4843 Anisotropy = 4.4620

XX= 21.0120 YX= -0.0004 ZX= 0.0006  
XY= -0.0008 YY= 26.4563 ZY= -1.1252  
XZ= 0.0004 YZ= 0.9303 ZZ= 22.9848  
Eigenvalues: 21.0120 22.9821 26.4590

39 H Isotropic = 24.2921 Anisotropy = 8.6556

XX= 21.8309 YX= -0.0002 ZX= 0.0002  
XY= -0.0009 YY= 26.6324 ZY= 2.4213  
XZ= 0.0002 YZ= 6.3828 ZZ= 24.4130  
Eigenvalues: 20.9830 21.8309 30.0625

40 Bq Isotropic = 7.2166 Anisotropy = 15.4777

XX= 0.7318 YX= 0.0006 ZX= -0.0002  
XY= 0.0011 YY= 3.5505 ZY= -1.2924  
XZ= -0.0001 YZ= -1.7696 ZZ= 17.3675  
Eigenvalues: 0.7318 3.3829 17.5351

41 Bq Isotropic = 6.1710 Anisotropy = 6.7376

XX= 1.7273 YX= -1.6421 ZX= 1.0045  
XY= -1.6259 YY= 6.2817 ZY= -2.1257  
XZ= -0.1879 YZ= 0.7628 ZZ= 10.5041  
Eigenvalues: 1.1982 6.6521 10.6628

42 Bq Isotropic = 6.1708 Anisotropy = 6.7365

XX= 1.7277 YX= 1.6436 ZX= -1.0047

XY= 1.6276 YY= 6.2819 ZY= -2.1243

XZ= 0.1884 YZ= 0.7605 ZZ= 10.5029

Eigenvalues: 1.1976 6.6530 10.6618

43 Bq Isotropic = 9.8285 Anisotropy = 23.1347

XX= 2.8560 YX= -0.7003 ZX= -1.8109

XY= 0.5249 YY= 1.6180 ZY= -1.1567

XZ= -2.3484 YZ= -0.9664 ZZ= 25.0116

Eigenvalues: 1.5408 2.6931 25.2517

44 Bq Isotropic = 9.8284 Anisotropy = 23.1328

XX= 2.8568 YX= 0.7004 ZX= 1.8100

XY= -0.5243 YY= 1.6184 ZY= -1.1623

XZ= 2.3456 YZ= -0.9739 ZZ= 25.0099

Eigenvalues: 1.5403 2.6945 25.2502

## 6.26 Computed xyz-coordinates and GIAO nuclear magnetic shielding tensors of NICS(-1) calculation of compound $7^{2+}$ (Bq = ghost atom, B3LYP/6-311+G<sup>\*\*</sup>)

Charge = 2 Multiplicity = 1

C 0 1.31222 2.16806 0.00008

C 0 1.22095 0.74156 -0.00002

N 0 -0.00002 0.1142 0.00000

C 0 -1.22103 0.74148 0.00002

C 0 -1.31239 2.16798 -0.00008

S 0 -0.00012 3.24341 0.00000

C 0 -2.54542 0.13881 0.00009

C 0 -3.54865 1.14093 -0.00006

S 0 -2.91116 2.78037 -0.00021

S 0 2.91097 2.78055 0.00021

C 0 3.54855 1.14114 0.00006

C 0 2.54537 0.13897 -0.00009

|    |   |          |          |          |
|----|---|----------|----------|----------|
| C  | 0 | 0.00005  | -1.34835 | 0.00000  |
| C  | 0 | 4.90767  | 0.86524  | 0.00006  |
| C  | 0 | 5.30128  | -0.4692  | -0.00013 |
| C  | 0 | 4.34354  | -1.4884  | -0.00032 |
| C  | 0 | 2.98754  | -1.20448 | -0.00029 |
| C  | 0 | -2.98753 | -1.20466 | 0.00029  |
| C  | 0 | -4.34351 | -1.48865 | 0.00032  |
| C  | 0 | -5.30131 | -0.4695  | 0.00012  |
| C  | 0 | -4.90776 | 0.86496  | -0.00006 |
| C  | 0 | 0.00028  | -2.01526 | 1.22084  |
| C  | 0 | 0.00035  | -3.40642 | 1.22055  |
| C  | 0 | 0.00021  | -4.0698  | 0.00000  |
| C  | 0 | -0.00001 | -3.40642 | -1.22055 |
| C  | 0 | -0.00009 | -2.01526 | -1.22084 |
| F  | 0 | 0.00028  | -5.41493 | 0.00000  |
| H  | 0 | 5.63966  | 1.66314  | 0.00019  |
| H  | 0 | 6.35593  | -0.71464 | -0.00014 |
| H  | 0 | 4.66135  | -2.52309 | -0.00049 |
| H  | 0 | 2.29657  | -2.0274  | -0.00045 |
| H  | 0 | -2.29652 | -2.02755 | 0.00045  |
| H  | 0 | -4.66127 | -2.52335 | 0.00048  |
| H  | 0 | -6.35594 | -0.71499 | 0.00013  |
| H  | 0 | -5.63979 | 1.66282  | -0.0002  |
| H  | 0 | 0.00038  | -1.46488 | 2.15326  |
| H  | 0 | 0.00052  | -3.96792 | 2.14536  |
| H  | 0 | -0.00011 | -3.96792 | -2.14536 |
| H  | 0 | -0.00024 | -1.46488 | -2.15326 |
| Bq | 0 | -0.00008 | 1.52945  | -1.00000 |
| Bq | 0 | -2.30769 | 1.3938   | -1.00005 |
| Bq | 0 | 2.30764  | 1.39417  | -0.99995 |
| Bq | 0 | -3.93902 | -0.16982 | -0.99988 |
| Bq | 0 | 3.939    | -0.16932 | -1.00012 |

Calculating GIAO nuclear magnetic shielding tensors.

SCF GIAO Magnetic shielding tensor (ppm):

1 C Isotropic = 8.6242 Anisotropy = 187.2544

XX= -33.1425 YX= 2.0694 ZX= -0.0141

XY= 0.4810 YY= -74.4453 ZY= -0.0077

XZ= 0.0001 YZ= -0.0095 ZZ= 133.4605

Eigenvalues: -74.4847 -33.1032 133.4605

2 C Isotropic = 34.1300 Anisotropy = 124.7825

XX= -10.3885 YX= 8.4820 ZX= 0.0071

XY= 6.4837 YY= -4.5398 ZY= -0.0065

XZ= -0.0001 YZ= -0.0059 ZZ= 117.3183

Eigenvalues: -15.4981 0.5698 117.3183

3 N Isotropic = 28.5597 Anisotropy = 226.1142

XX= -40.6105 YX= 0.0004 ZX= 0.0064

XY= 0.0022 YY= -53.0129 ZY= -0.0000

XZ= 0.0056 YZ= -0.0001 ZZ= 179.3025

Eigenvalues: -53.0129 -40.6105 179.3025

4 C Isotropic = 34.1301 Anisotropy = 124.7822

XX= -10.3872 YX= -8.4813 ZX= 0.0070

XY= -6.4834 YY= -4.5406 ZY= 0.0064

XZ= -0.0001 YZ= 0.0057 ZZ= 117.3183

Eigenvalues: -15.4971 0.5692 117.3183

5 C Isotropic = 8.6239 Anisotropy = 187.2538

XX= -33.1436 YX= -2.0672 ZX= -0.0140

XY= -0.4778 YY= -74.4445 ZY= 0.0075

XZ= 0.0001 YZ= 0.0092 ZZ= 133.4597

Eigenvalues: -74.4837 -33.1044 133.4597

6 S Isotropic = 169.5480 Anisotropy = 506.6246

XX= 65.0317 YX= 0.0035 ZX= -0.0314

XY= 0.0089 YY= -63.6854 ZY= -0.0001

XZ= -0.0504 YZ= 0.0001 ZZ= 507.2977

Eigenvalues: -63.6854 65.0316 507.2977

7 C Isotropic = 53.0795 Anisotropy = 140.4270

XX= -23.4751 YX= -5.4889 ZX= 0.0007

S194

XY= -6.4631 YY= 36.0161 ZY= 0.0172  
XZ= -0.0099 YZ= 0.0128 ZZ= 146.6975  
Eigenvalues: -24.0695 36.6105 146.6975

8 C Isotropic = 33.4447 Anisotropy = 133.2856

XX= 19.8152 YX= -14.7625 ZX= -0.0040  
XY= -13.9488 YY= -41.7829 ZY= 0.0172  
XZ= 0.0137 YZ= 0.0150 ZZ= 122.3018  
Eigenvalues: -44.9642 22.9966 122.3018

9 S Isotropic = 216.3211 Anisotropy = 247.2318

XX= 270.1146 YX= 33.8050 ZX= -0.0060  
XY= 22.5303 YY= -2.2937 ZY= 0.0345  
XZ= 0.0009 YZ= 0.0107 ZZ= 381.1422  
Eigenvalues: -5.1758 272.9967 381.1422

10 S Isotropic = 216.3197 Anisotropy = 247.2272

XX= 270.1166 YX= -33.7865 ZX= -0.0060  
XY= -22.5124 YY= -2.2953 ZY= -0.0349  
XZ= 0.0011 YZ= -0.0110 ZZ= 381.1378  
Eigenvalues: -5.1737 272.9950 381.1378

11 C Isotropic = 33.4448 Anisotropy = 133.2842

XX= 19.8148 YX= 14.7654 ZX= -0.0040  
XY= 13.9535 YY= -41.7813 ZY= -0.0175  
XZ= 0.0139 YZ= -0.0153 ZZ= 122.3010  
Eigenvalues: -44.9644 22.9979 122.3010

12 C Isotropic = 53.0799 Anisotropy = 140.4251

XX= -23.4755 YX= 5.4874 ZX= 0.0007  
XY= 6.4590 YY= 36.0186 ZY= -0.0173  
XZ= -0.0098 YZ= -0.0129 ZZ= 146.6966  
Eigenvalues: -24.0693 36.6124 146.6966

13 C Isotropic = 42.0407 Anisotropy = 109.2846

XX= 114.8971 YX= 0.0097 ZX= -0.0061  
XY= 0.0092 YY= -56.2555 ZY= 0.0001  
XZ= -0.0092 YZ= -0.0000 ZZ= 67.4805  
Eigenvalues: -56.2555 67.4805 114.8971

14 C Isotropic = 50.8192 Anisotropy = 181.0659

XX= -10.8204 YX= -38.8240 ZX= -0.0108

XY= -37.6150 YY= -8.2518 ZY= -0.0264

XZ= -0.0082 YZ= -0.0237 ZZ= 171.5298

Eigenvalues: -47.7771 28.7050 171.5298

15 C Isotropic = 32.5389 Anisotropy = 215.2410

XX= -72.0932 YX= 17.8435 ZX= -0.0043

XY= 11.8839 YY= -6.3231 ZY= -0.0280

XZ= -0.0036 YZ= -0.0316 ZZ= 176.0328

Eigenvalues: -75.2963 -3.1199 176.0328

16 C Isotropic = 44.7228 Anisotropy = 198.8607

XX= 17.8056 YX= 22.7231 ZX= 0.0002

XY= 22.3566 YY= -60.9338 ZY= -0.0391

XZ= 0.0018 YZ= -0.0359 ZZ= 177.2966

Eigenvalues: -66.9295 23.8013 177.2966

17 C Isotropic = 45.2898 Anisotropy = 187.3520

XX= 4.4418 YX= -32.4804 ZX= -0.0110

XY= -24.0553 YY= -38.7636 ZY= -0.0353

XZ= -0.0156 YZ= -0.0307 ZZ= 170.1911

Eigenvalues: -52.7382 18.4165 170.1911

18 C Isotropic = 45.2912 Anisotropy = 187.3534

XX= 4.4393 YX= 32.4834 ZX= -0.0111

XY= 24.0578 YY= -38.7591 ZY= 0.0352

XZ= -0.0158 YZ= 0.0305 ZZ= 170.1935

Eigenvalues: -52.7373 18.4175 170.1935

19 C Isotropic = 44.7224 Anisotropy = 198.8607

XX= 17.8080 YX= -22.7195 ZX= 0.0001

XY= -22.3525 YY= -60.9370 ZY= 0.0389

XZ= 0.0016 YZ= 0.0357 ZZ= 177.2961

Eigenvalues: -66.9304 23.8014 177.2962

20 C Isotropic = 32.5391 Anisotropy = 215.2415

XX= -72.0918 YX= -17.8465 ZX= -0.0045

XY= -11.8868 YY= -6.3243 ZY= 0.0279

S196



XZ= -0.0037 YZ= 0.0315 ZZ= 176.0334

Eigenvalues: -75.2962 -3.1198 176.0334

21 C Isotropic = 50.8193 Anisotropy = 181.0662

XX= -10.8249 YX= 38.8249 ZX= -0.0109

XY= 37.6153 YY= -8.2472 ZY= 0.0262

XZ= -0.0083 YZ= 0.0236 ZZ= 171.5301

Eigenvalues: -47.7779 28.7057 171.5301

22 C Isotropic = 55.5242 Anisotropy = 168.0419

XX= 167.5521 YX= 0.0035 ZX= -0.0260

XY= 0.0059 YY= 17.3872 ZY= -30.0529

XZ= -0.0264 YZ= -14.9487 ZZ= -18.3668

Eigenvalues: -29.2278 28.2482 167.5521

23 C Isotropic = 51.0896 Anisotropy = 174.9540

XX= 167.7256 YX= 0.0131 ZX= -0.0278

XY= 0.0120 YY= 11.6454 ZY= 27.2136

XZ= -0.0295 YZ= 20.2064 ZZ= -26.1022

Eigenvalues: -37.5333 23.0765 167.7256

24 C Isotropic = 4.8956 Anisotropy = 119.4877

XX= 84.5540 YX= 0.0080 ZX= -0.0100

XY= 0.0091 YY= -81.0886 ZY= -0.0000

XZ= -0.0106 YZ= -0.0000 ZZ= 11.2213

Eigenvalues: -81.0886 11.2213 84.5540

25 C Isotropic = 51.0897 Anisotropy = 174.9539

XX= 167.7257 YX= 0.0047 ZX= -0.0247

XY= 0.0054 YY= 11.6454 ZY= -27.2137

XZ= -0.0264 YZ= -20.2064 ZZ= -26.1018

Eigenvalues: -37.5330 23.0765 167.7257

26 C Isotropic = 55.5243 Anisotropy = 168.0420

XX= 167.5523 YX= 0.0136 ZX= -0.0296

XY= 0.0111 YY= 17.3873 ZY= 30.0528

XZ= -0.0259 YZ= 14.9488 ZZ= -18.3666

Eigenvalues: -29.2276 28.2483 167.5523

27 F Isotropic = 249.6607 Anisotropy = 151.1915

XX= 350.4551 YX= 0.0049 ZX= -0.0302  
XY= 0.0052 YY= 254.7321 ZY= 0.0000  
XZ= -0.0307 YZ= -0.0001 ZZ= 143.7951  
Eigenvalues: 143.7951 254.7321 350.4551

28 H Isotropic = 23.4031 Anisotropy = 8.1994

XX= 27.7961 YX= -2.1996 ZX= -0.0001  
XY= -2.2052 YY= 24.3500 ZY= 0.0004  
XZ= -0.0000 YZ= 0.0008 ZZ= 18.0632  
Eigenvalues: 18.0632 23.2767 28.8693

29 H Isotropic = 23.1534 Anisotropy = 5.3074

XX= 23.8742 YX= 0.8495 ZX= 0.0003  
XY= 0.6131 YY= 26.5019 ZY= 0.0011  
XZ= 0.0001 YZ= 0.0009 ZZ= 19.0842  
Eigenvalues: 19.0842 23.6844 26.6917

30 H Isotropic = 23.8128 Anisotropy = 8.8338

XX= 29.6233 YX= 0.8638 ZX= 0.0001  
XY= 0.5840 YY= 23.0437 ZY= 0.0002  
XZ= -0.0006 YZ= 0.0010 ZZ= 18.7714  
Eigenvalues: 18.7714 22.9650 29.7020

31 H Isotropic = 25.3600 Anisotropy = 18.1124

XX= 37.4239 YX= 1.2592 ZX= -0.0026  
XY= -2.0452 YY= 23.4164 ZY= 0.0004  
XZ= -0.0023 YZ= 0.0006 ZZ= 15.2397  
Eigenvalues: 15.2397 23.4054 37.4350

32 H Isotropic = 25.3596 Anisotropy = 18.1112

XX= 37.4226 YX= -1.2578 ZX= -0.0026  
XY= 2.0463 YY= 23.4163 ZY= -0.0004  
XZ= -0.0022 YZ= -0.0006 ZZ= 15.2397  
Eigenvalues: 15.2397 23.4052 37.4337

33 H Isotropic = 23.8127 Anisotropy = 8.8335

XX= 29.6231 YX= -0.8635 ZX= 0.0001  
XY= -0.5835 YY= 23.0437 ZY= -0.0002  
XZ= -0.0006 YZ= -0.0010 ZZ= 18.7713

Eigenvalues: 18.7713 22.9651 29.7017

34 H Isotropic = 23.1534 Anisotropy = 5.3074

XX= 23.8743 YX= -0.8496 ZX= 0.0003

XY= -0.6131 YY= 26.5019 ZY= -0.0011

XZ= 0.0001 YZ= -0.0009 ZZ= 19.0842

Eigenvalues: 19.0842 23.6844 26.6917

35 H Isotropic = 23.4031 Anisotropy = 8.1995

XX= 27.7959 YX= 2.1999 ZX= -0.0001

XY= 2.2054 YY= 24.3502 ZY= -0.0004

XZ= -0.0000 YZ= -0.0008 ZZ= 18.0633

Eigenvalues: 18.0633 23.2767 28.8694

36 H Isotropic = 24.2921 Anisotropy = 8.6556

XX= 21.8309 YX= -0.0006 ZX= 0.0004

XY= 0.0002 YY= 26.6324 ZY= -2.4213

XZ= 0.0002 YZ= -6.3828 ZZ= 24.4130

Eigenvalues: 20.9830 21.8309 30.0625

37 H Isotropic = 23.4843 Anisotropy = 4.4620

XX= 21.0119 YX= -0.0001 ZX= 0.0004

XY= 0.0001 YY= 26.4563 ZY= 1.1252

XZ= 0.0001 YZ= -0.9303 ZZ= 22.9848

Eigenvalues: 21.0119 22.9820 26.4590

38 H Isotropic = 23.4843 Anisotropy = 4.4620

XX= 21.0120 YX= -0.0004 ZX= 0.0006

XY= -0.0008 YY= 26.4563 ZY= -1.1252

XZ= 0.0004 YZ= 0.9303 ZZ= 22.9848

Eigenvalues: 21.0120 22.9821 26.4590

39 H Isotropic = 24.2921 Anisotropy = 8.6556

XX= 21.8309 YX= -0.0002 ZX= 0.0002

XY= -0.0009 YY= 26.6324 ZY= 2.4213

XZ= 0.0002 YZ= 6.3828 ZZ= 24.4130

Eigenvalues: 20.9830 21.8309 30.0625

40 Bq Isotropic = 7.2166 Anisotropy = 15.4777

XX= 0.7318 YX= -0.0006 ZX= -0.0004

XY= -0.0013 YY= 3.5505 ZY= 1.2924  
XZ= -0.0003 YZ= 1.7696 ZZ= 17.3675  
Eigenvalues: 0.7318 3.3829 17.5351

41 Bq Isotropic = 6.1708 Anisotropy = 6.7369

XX= 1.7279 YX= -1.6439 ZX= -1.0048  
XY= -1.6277 YY= 6.2815 ZY= 2.1243  
XZ= 0.1885 YZ= -0.7604 ZZ= 10.5032  
Eigenvalues: 1.1976 6.6527 10.6621

42 Bq Isotropic = 6.1710 Anisotropy = 6.7372

XX= 1.7271 YX= 1.6418 ZX= 1.0043  
XY= 1.6257 YY= 6.2821 ZY= 2.1256  
XZ= -0.1878 YZ= -0.7629 ZZ= 10.5038  
Eigenvalues: 1.1982 6.6524 10.6625

43 Bq Isotropic = 9.8283 Anisotropy = 23.1330

XX= 2.8567 YX= -0.7002 ZX= 1.8099  
XY= 0.5245 YY= 1.6183 ZY= 1.1624  
XZ= 2.3456 YZ= 0.9740 ZZ= 25.0100  
Eigenvalues: 1.5403 2.6944 25.2503

44 Bq Isotropic = 9.8286 Anisotropy = 23.1345

XX= 2.8561 YX= 0.7005 ZX= -1.8109  
XY= -0.5247 YY= 1.6181 ZY= 1.1566  
XZ= -2.3484 YZ= 0.9663 ZZ= 25.0115  
Eigenvalues: 1.5408 2.6933 25.2516

## 6.27 Computed xyz-coordinates and GIAO nuclear magnetic shielding tensors of NICS(0) calculation of compound $6^{2+}$ (Bq = ghost atom, B3LYP/6-311+G<sup>\*\*</sup>)

Charge = 2 Multiplicity = 1

|   |   |          |          |          |
|---|---|----------|----------|----------|
| C | 0 | -0.31494 | -2.24811 | 0.02175  |
| C | 0 | -0.94876 | -0.96624 | -0.01296 |
| N | 0 | -0.19463 | 0.1761   | -0.02041 |
| C | 0 | 1.16158  | 0.1907   | -0.02376 |

|   |   |          |          |          |
|---|---|----------|----------|----------|
| C | 0 | 1.99421  | -0.95851 | -0.00646 |
| S | 0 | 1.36112  | -2.5388  | 0.03232  |
| S | 0 | -1.41285 | -3.56537 | 0.05296  |
| C | 0 | -2.77598 | -2.44779 | 0.00806  |
| C | 0 | -2.38914 | -1.08501 | -0.03123 |
| S | 0 | 2.06428  | 1.6738   | -0.03642 |
| C | 0 | 3.57927  | 0.76184  | -0.02155 |
| C | 0 | 3.38206  | -0.64056 | -0.00558 |
| C | 0 | -0.83505 | 1.49705  | -0.00011 |
| C | 0 | -1.06669 | 2.15148  | -1.20758 |
| C | 0 | -1.65016 | 3.41338  | -1.17886 |
| C | 0 | -1.97295 | 3.96831  | 0.05209  |
| C | 0 | -1.73668 | 3.32215  | 1.25832  |
| C | 0 | -1.15429 | 2.06022  | 1.2335   |
| F | 0 | -2.53915 | 5.18844  | 0.07757  |
| C | 0 | -4.10094 | -2.85681 | -0.00071 |
| C | 0 | -5.0856  | -1.8742  | -0.05725 |
| C | 0 | -4.73965 | -0.51858 | -0.10523 |
| C | 0 | -3.41517 | -0.11514 | -0.09201 |
| C | 0 | 4.85004  | 1.3178   | -0.02444 |
| C | 0 | 5.93815  | 0.44681  | -0.00959 |
| C | 0 | 5.7644   | -0.94853 | 0.0077   |
| C | 0 | 4.49906  | -1.50177 | 0.01004  |
| H | 0 | -0.80854 | 1.68979  | -2.15233 |
| H | 0 | -1.85247 | 3.9576   | -2.09184 |
| H | 0 | -2.00257 | 3.79825  | 2.19282  |
| H | 0 | -0.95891 | 1.52798  | 2.15606  |
| H | 0 | -4.36306 | -3.90614 | 0.03183  |
| H | 0 | -6.12825 | -2.16655 | -0.06631 |
| H | 0 | -5.5182  | 0.23174  | -0.15341 |
| H | 0 | -3.19253 | 0.9372   | -0.1323  |
| H | 0 | 4.99772  | 2.38977  | -0.0368  |
| H | 0 | 6.94008  | 0.85795  | -0.01094 |

|    |   |          |          |          |
|----|---|----------|----------|----------|
| H  | 0 | 6.63299  | -1.59399 | 0.01907  |
| H  | 0 | 4.37101  | -2.57737 | 0.02241  |
| Bq | 0 | 0.50976  | -1.05748 | -0.00159 |
| Bq | 0 | -1.56833 | -2.0625  | 0.00772  |
| Bq | 0 | 2.43628  | 0.20546  | -0.01875 |
| Bq | 0 | -3.75108 | -1.48292 | -0.04639 |
| Bq | 0 | 4.66883  | -0.09407 | -0.00724 |

Calculating GIAO nuclear magnetic shielding tensors.

SCF GIAO Magnetic shielding tensor (ppm):

1 C Isotropic = 9.3917 Anisotropy = 185.0070

XX= -44.5881 YX= 17.9852 ZX= -0.5833

XY= 15.5494 YY= -59.7709 ZY= 5.2661

XZ= -2.1844 YZ= 6.8789 ZZ= 132.5339

Eigenvalues: -70.7539 -33.8008 132.7297

2 C Isotropic = 35.1802 Anisotropy = 125.9955

XX= -14.0536 YX= -1.4983 ZX= -2.2998

XY= 5.2924 YY= 0.5323 ZY= 2.0009

XZ= -2.5824 YZ= 3.8565 ZZ= 119.0619

Eigenvalues: -14.3549 0.7184 119.1772

3 N Isotropic = 26.0242 Anisotropy = 236.2315

XX= -36.3797 YX= 15.9117 ZX= 0.1228

XY= 7.3499 YY= -69.0467 ZY= 0.1076

XZ= -1.2875 YZ= 3.3445 ZZ= 183.4989

Eigenvalues: -72.7775 -32.6618 183.5119

4 C Isotropic = 13.6598 Anisotropy = 133.0554

XX= -43.9186 YX= 11.7932 ZX= -0.4822

XY= 9.4077 YY= -17.4294 ZY= 1.1537

XZ= -3.3524 YZ= 1.4052 ZZ= 102.3273

Eigenvalues: -47.6715 -13.7125 102.3634

5 C Isotropic = 31.0434 Anisotropy = 156.3685

XX= -40.9515 YX= 7.6994 ZX= -0.8405

XY= 17.6868 YY= -1.1241 ZY= 3.2698

XZ= -1.0651 YZ= 3.3700 ZZ= 135.2059

Eigenvalues: -44.6718 2.5130 135.2891

6 S Isotropic = 194.1439 Anisotropy = 473.7719

XX= 84.6794 YX= 43.6961 ZX= -1.3440

XY= 10.7764 YY= -11.7520 ZY= 12.6652

XZ= -0.1119 YZ= 19.2297 ZZ= 509.5044

Eigenvalues: -19.3736 91.8135 509.9918

7 S Isotropic = 219.2011 Anisotropy = 233.2354

XX= 226.7348 YX= 94.9439 ZX= -4.4324

XY= 94.4477 YY= 56.5925 ZY= 9.5964

XZ= -8.6800 YZ= 10.1367 ZZ= 374.2759

Eigenvalues: 13.9884 268.9235 374.6913

8 C Isotropic = 32.7577 Anisotropy = 134.9467

XX= -6.4846 YX= 33.4805 ZX= -2.2183

XY= 31.4800 YY= -17.8123 ZY= 4.8437

XZ= -4.6176 YZ= 2.5935 ZZ= 122.5700

Eigenvalues: -45.2705 20.8215 122.7222

9 C Isotropic = 54.5208 Anisotropy = 141.2346

XX= -13.2968 YX= -23.2660 ZX= -2.5821

XY= -24.1273 YY= 28.3820 ZY= 4.1411

XZ= -0.9577 YZ= 4.5284 ZZ= 148.4772

Eigenvalues: -24.0141 38.8993 148.6772

10 S Isotropic = 252.0373 Anisotropy = 125.8992

XX= 267.4735 YX= 106.9415 ZX= -0.9441

XY= 52.0039 YY= 152.9017 ZY= 3.1669

XZ= 5.9823 YZ= -1.8631 ZZ= 335.7368

Eigenvalues: 112.2189 307.9230 335.9701

11 C Isotropic = 31.8257 Anisotropy = 134.3918

XX= -10.2324 YX= 24.8792 ZX= -0.7532

XY= 24.6674 YY= -15.6930 ZY= 1.4455

XZ= -2.2041 YZ= -1.6830 ZZ= 121.4024

Eigenvalues: -37.8911 11.9479 121.4202

12 C Isotropic = 46.2773 Anisotropy = 142.4032

XX= -6.8970 YX= -19.3520 ZX= -0.4860

XY= -19.8033 YY= 4.5528 ZY= 1.7054

XZ= -1.1647 YZ= 2.2171 ZZ= 141.1762

Eigenvalues: -21.5712 19.1905 141.2128

13 C Isotropic = 40.7437 Anisotropy = 107.5639

XX= 84.1067 YX= 63.5094 ZX= 2.3794

XY= 58.9771 YY= -20.3417 ZY= -0.0412

XZ= 2.4021 YZ= -0.1657 ZZ= 58.4662

Eigenvalues: -48.6154 58.3936 112.4530

14 C Isotropic = 54.2899 Anisotropy = 169.6460

XX= 142.0806 YX= 53.8978 ZX= 19.8671

XY= 55.1215 YY= 47.2820 ZY= -17.9841

XZ= 16.9547 YZ= -17.2365 ZZ= -26.4930

Eigenvalues: -36.4382 31.9206 167.3872

15 C Isotropic = 53.3227 Anisotropy = 169.9585

XX= 140.6460 YX= 56.8743 ZX= -3.5783

XY= 58.1432 YY= 37.2847 ZY= 27.0587

XZ= -2.7645 YZ= 25.8942 ZZ= -17.9626

Eigenvalues: -32.8559 26.1956 166.6283

16 C Isotropic = 4.9342 Anisotropy = 119.9130

XX= 54.6781 YX= 64.5811 ZX= 3.6318

XY= 64.0988 YY= -53.0771 ZY= -0.1626

XZ= 3.9229 YZ= -0.1802 ZZ= 13.2017

Eigenvalues: -83.1506 13.0770 84.8762

17 C Isotropic = 52.8651 Anisotropy = 170.9648

XX= 139.0903 YX= 58.3090 ZX= 17.6168

XY= 59.0030 YY= 40.9164 ZY= -20.5195

XZ= 17.7331 YZ= -17.0584 ZZ= -21.4115

Eigenvalues: -34.2936 26.0471 166.8416

18 C Isotropic = 54.0869 Anisotropy = 168.7305

XX= 143.4469 YX= 51.7763 ZX= -3.8559

XY= 54.2502 YY= 42.7555 ZY= 28.6402

XZ= -1.3904 YZ= 25.2017 ZZ= -23.9416

Eigenvalues: -36.1133 31.8001 166.5739



19 F Isotropic = 247.8245 Anisotropy = 153.6208

XX= 332.9888 YX= 36.1123 ZX= 7.6468

XY= 37.2136 YY= 269.7441 ZY= 6.0211

XZ= 8.2078 YZ= 6.2753 ZZ= 140.7406

Eigenvalues: 140.2388 252.9963 350.2384

20 C Isotropic = 50.8989 Anisotropy = 181.2179

XX= 21.7213 YX= -20.4639 ZX= -1.8609

XY= -21.1653 YY= -40.4904 ZY= 7.2934

XZ= -2.3507 YZ= 5.5539 ZZ= 171.4658

Eigenvalues: -46.9525 27.9384 171.7108

21 C Isotropic = 32.4878 Anisotropy = 214.6349

XX= -69.5556 YX= -17.2774 ZX= -4.2225

XY= -21.9605 YY= -8.1147 ZY= 6.9322

XZ= -5.6789 YZ= 8.1087 ZZ= 175.1336

Eigenvalues: -75.3138 -2.8006 175.5777

22 C Isotropic = 44.5519 Anisotropy = 200.6143

XX= -19.2848 YX= 44.0666 ZX= -6.0195

XY= 44.9889 YY= -24.8459 ZY= 9.3583

XZ= -6.2848 YZ= 9.0554 ZZ= 177.7866

Eigenvalues: -67.1669 22.5279 178.2948

23 C Isotropic = 45.8670 Anisotropy = 188.2135

XX= 18.8449 YX= -0.5711 ZX= -2.7312

XY= 5.3216 YY= -52.2415 ZY= 9.6448

XZ= 1.6345 YZ= 7.8896 ZZ= 170.9975

Eigenvalues: -52.6654 18.9237 171.3426

24 C Isotropic = 51.5170 Anisotropy = 180.8279

XX= 28.0406 YX= -10.9109 ZX= -0.3452

XY= -13.4140 YY= -45.5311 ZY= 2.6456

XZ= -0.1188 YZ= 2.1575 ZZ= 172.0415

Eigenvalues: -47.5145 29.9965 172.0690

25 C Isotropic = 28.1932 Anisotropy = 217.8594

XX= -68.4119 YX= -25.4405 ZX= -0.6466

XY= -26.7352 YY= -20.3923 ZY= 2.4430

XZ= -0.2281 YZ= 3.5311 ZZ= 173.3838

Eigenvalues: -79.8595 -8.9937 173.4328

26 C Isotropic = 43.0264 Anisotropy = 202.8673

XX= -26.4773 YX= 37.9896 ZX= -1.2692

XY= 43.4247 YY= -22.6767 ZY= 2.7408

XZ= -1.3153 YZ= 2.5749 ZZ= 178.2332

Eigenvalues: -65.3600 16.1679 178.2712

27 C Isotropic = 49.7786 Anisotropy = 182.9519

XX= 31.0980 YX= 4.0080 ZX= -0.5871

XY= 5.1584 YY= -53.4673 ZY= 2.8298

XZ= 0.1997 YZ= 3.2688 ZZ= 171.7051

Eigenvalues: -53.7564 31.3457 171.7465

28 H Isotropic = 24.3326 Anisotropy = 9.0557

XX= 23.0265 YX= -1.7367 ZX= 1.1617

XY= -2.2204 YY= 25.4708 ZY= -2.2990

XZ= 2.3199 YZ= -6.5245 ZZ= 24.5006

Eigenvalues: 20.5470 22.0812 30.3698

29 H Isotropic = 23.5276 Anisotropy = 4.7148

XX= 21.6982 YX= -2.3614 ZX= -0.7232

XY= -2.3253 YY= 25.5593 ZY= 0.8772

XZ= -0.1848 YZ= -0.9964 ZZ= 23.3253

Eigenvalues: 20.5246 23.3874 26.6708

30 H Isotropic = 23.5939 Anisotropy = 4.8468

XX= 21.6211 YX= -2.4809 ZX= 0.2976

XY= -2.2530 YY= 25.7466 ZY= -1.0909

XZ= -0.1748 YZ= 0.9829 ZZ= 23.4141

Eigenvalues: 20.5438 23.4128 26.8252

31 H Isotropic = 24.4800 Anisotropy = 9.2311

XX= 22.9971 YX= -1.9446 ZX= -1.3457

XY= -2.1884 YY= 25.4883 ZY= 2.2409

XZ= -2.4285 YZ= 6.5175 ZZ= 24.9545

Eigenvalues: 20.8327 21.9731 30.6340

32 H Isotropic = 23.3666 Anisotropy = 8.2351

XX= 28.8471 YX= 0.2902 ZX= 0.1672  
XY= 0.0968 YY= 23.2610 ZY= -0.1537  
XZ= 0.2008 YZ= -0.1734 ZZ= 17.9917

Eigenvalues: 17.9833 23.2598 28.8567

33 H Isotropic = 23.1811 Anisotropy = 5.4621

XX= 23.8525 YX= -0.6663 ZX= 0.1173  
XY= -0.9042 YY= 26.6037 ZY= -0.3057  
XZ= 0.0758 YZ= -0.2341 ZZ= 19.0872

Eigenvalues: 19.0766 23.6443 26.8226

34 H Isotropic = 23.8311 Anisotropy = 8.4721

XX= 27.4417 YX= 3.1407 ZX= 0.0819  
XY= 2.8508 YY= 25.0716 ZY= -0.0922  
XZ= 0.2659 YZ= -0.0878 ZZ= 18.9799

Eigenvalues: 18.9718 23.0423 29.4791

35 H Isotropic = 24.9400 Anisotropy = 16.6166

XX= 33.7486 YX= 6.8203 ZX= 0.7985  
XY= 2.9295 YY= 25.4281 ZY= 0.1239  
XZ= 0.4132 YZ= 0.3409 ZZ= 15.6433

Eigenvalues: 15.6225 23.1799 36.0177

36 H Isotropic = 23.5995 Anisotropy = 9.0377

XX= 29.5824 YX= 0.3838 ZX= -0.0020  
XY= 0.7026 YY= 22.6328 ZY= -0.0556  
XZ= -0.0047 YZ= -0.0869 ZZ= 18.5833

Eigenvalues: 18.5820 22.5918 29.6246

37 H Isotropic = 23.1361 Anisotropy = 5.6810

XX= 24.0118 YX= -1.9194 ZX= 0.0171  
XY= -1.6615 YY= 25.8210 ZY= -0.0977  
XZ= 0.0739 YZ= -0.0548 ZZ= 19.5754

Eigenvalues: 19.5744 22.9104 26.9234

38 H Isotropic = 23.4391 Anisotropy = 5.7149

XX= 25.9638 YX= 1.5805 ZX= -0.0202  
XY= 1.9512 YY= 24.8220 ZY= -0.0761  
XZ= -0.0095 YZ= -0.0535 ZZ= 19.5315

Eigenvalues: 19.5307 23.5375 27.2491

39 H Isotropic = 22.9831 Anisotropy = 9.9099

XX= 29.4656 YX= -1.0989 ZX= 0.0250

XY= -0.8043 YY= 22.2821 ZY= -0.1125

XZ= 0.0282 YZ= -0.0619 ZZ= 17.2014

Eigenvalues: 17.1999 22.1596 29.5897

40 Bq Isotropic = 7.1943 Anisotropy = 11.9540

XX= 6.6920 YX= -3.9178 ZX= -0.1070

XY= -3.1631 YY= 13.6804 ZY= -0.1819

XZ= -0.0988 YZ= -0.3510 ZZ= 1.2104

Eigenvalues: 1.1977 5.2216 15.1636

41 Bq Isotropic = 7.3753 Anisotropy = 25.7071

XX= 10.2018 YX= -2.1329 ZX= 0.3979

XY= -3.0157 YY= 24.0191 ZY= -1.1072

XZ= 0.0532 YZ= -0.9498 ZZ= -12.0949

Eigenvalues: -12.1252 9.7379 24.5134

42 Bq Isotropic = 6.3947 Anisotropy = 27.4239

XX= 10.9946 YX= -5.5740 ZX= 0.0152

XY= -4.1616 YY= 22.9395 ZY= -0.4309

XZ= -0.0796 YZ= -0.5614 ZZ= -14.7500

Eigenvalues: -14.7569 9.2637 24.6773

43 Bq Isotropic = 8.2569 Anisotropy = 2.5844

XX= 7.5083 YX= 1.2663 ZX= -0.0334

XY= -0.3012 YY= 7.2860 ZY= 0.0232

XZ= -0.0115 YZ= 0.1723 ZZ= 9.9763

Eigenvalues: 6.8993 7.8915 9.9798

44 Bq Isotropic = 5.9903 Anisotropy = 3.6506

XX= 7.7910 YX= -1.2591 ZX= -0.0128

XY= -0.8073 YY= 6.7373 ZY= 0.0483

XZ= 0.0405 YZ= -0.0861 ZZ= 3.4426

Eigenvalues: 3.4424 6.1044 8.4240

6.28 Computed xyz-coordinates and GIAO nuclear magnetic shielding tensors of NICS(1) calculation of compound **6**<sup>2+</sup> (Bq = ghost atom, B3LYP/6-311+G\*\*)

Charge = 2 Multiplicity = 1

|   |   |          |          |          |
|---|---|----------|----------|----------|
| C | 0 | -0.31494 | -2.24811 | 0.02175  |
| C | 0 | -0.94876 | -0.96624 | -0.01296 |
| N | 0 | -0.19463 | 0.1761   | -0.02041 |
| C | 0 | 1.16158  | 0.1907   | -0.02376 |
| C | 0 | 1.99421  | -0.95851 | -0.00646 |
| S | 0 | 1.36112  | -2.5388  | 0.03232  |
| S | 0 | -1.41285 | -3.56537 | 0.05296  |
| C | 0 | -2.77598 | -2.44779 | 0.00806  |
| C | 0 | -2.38914 | -1.08501 | -0.03123 |
| S | 0 | 2.06428  | 1.6738   | -0.03642 |
| C | 0 | 3.57927  | 0.76184  | -0.02155 |
| C | 0 | 3.38206  | -0.64056 | -0.00558 |
| C | 0 | -0.83505 | 1.49705  | -0.00011 |
| C | 0 | -1.06669 | 2.15148  | -1.20758 |
| C | 0 | -1.65016 | 3.41338  | -1.17886 |
| C | 0 | -1.97295 | 3.96831  | 0.05209  |
| C | 0 | -1.73668 | 3.32215  | 1.25832  |
| C | 0 | -1.15429 | 2.06022  | 1.2335   |
| F | 0 | -2.53915 | 5.18844  | 0.07757  |
| C | 0 | -4.10094 | -2.85681 | -0.00071 |
| C | 0 | -5.0856  | -1.8742  | -0.05725 |
| C | 0 | -4.73965 | -0.51858 | -0.10523 |
| C | 0 | -3.41517 | -0.11514 | -0.09201 |
| C | 0 | 4.85004  | 1.3178   | -0.02444 |
| C | 0 | 5.93815  | 0.44681  | -0.00959 |
| C | 0 | 5.7644   | -0.94853 | 0.0077   |
| C | 0 | 4.49906  | -1.50177 | 0.01004  |
| H | 0 | -0.80854 | 1.68979  | -2.15233 |

|    |   |          |          |          |
|----|---|----------|----------|----------|
| H  | 0 | -1.85247 | 3.9576   | -2.09184 |
| H  | 0 | -2.00257 | 3.79825  | 2.19282  |
| H  | 0 | -0.95891 | 1.52798  | 2.15606  |
| H  | 0 | -4.36306 | -3.90614 | 0.03183  |
| H  | 0 | -6.12825 | -2.16655 | -0.06631 |
| H  | 0 | -5.5182  | 0.23174  | -0.15341 |
| H  | 0 | -3.19253 | 0.9372   | -0.1323  |
| H  | 0 | 4.99772  | 2.38977  | -0.0368  |
| H  | 0 | 6.94008  | 0.85795  | -0.01094 |
| H  | 0 | 6.63299  | -1.59399 | 0.01907  |
| H  | 0 | 4.37101  | -2.57737 | 0.02241  |
| Bq | 0 | 0.50509  | -1.03728 | 0.9982   |
| Bq | 0 | -1.57813 | -2.03091 | 1.00717  |
| Bq | 0 | 2.43295  | 0.21731  | 0.98117  |
| Bq | 0 | -3.77107 | -1.44247 | 0.95259  |
| Bq | 0 | 4.66512  | -0.08135 | 0.99268  |

Calculating GIAO nuclear magnetic shielding tensors.

SCF GIAO Magnetic shielding tensor (ppm):

1 C Isotropic = 9.3917 Anisotropy = 185.0070

XX= -44.5881 YX= 17.9852 ZX= -0.5833

XY= 15.5493 YY= -59.7709 ZY= 5.2661

XZ= -2.1844 YZ= 6.8789 ZZ= 132.5339

Eigenvalues: -70.7538 -33.8008 132.7296

2 C Isotropic = 35.1802 Anisotropy = 125.9955

XX= -14.0536 YX= -1.4983 ZX= -2.2998

XY= 5.2923 YY= 0.5323 ZY= 2.0009

XZ= -2.5824 YZ= 3.8565 ZZ= 119.0619

Eigenvalues: -14.3549 0.7184 119.1772

3 N Isotropic = 26.0242 Anisotropy = 236.2315

XX= -36.3797 YX= 15.9117 ZX= 0.1228

XY= 7.3499 YY= -69.0467 ZY= 0.1076

XZ= -1.2875 YZ= 3.3445 ZZ= 183.4989

Eigenvalues: -72.7776 -32.6618 183.5119

4 C Isotropic = 13.6598 Anisotropy = 133.0554  
XX= -43.9185 YX= 11.7931 ZX= -0.4822  
XY= 9.4077 YY= -17.4294 ZY= 1.1537  
XZ= -3.3524 YZ= 1.4052 ZZ= 102.3273  
Eigenvalues: -47.6715 -13.7125 102.3634

5 C Isotropic = 31.0434 Anisotropy = 156.3685  
XX= -40.9515 YX= 7.6994 ZX= -0.8405  
XY= 17.6868 YY= -1.1241 ZY= 3.2698  
XZ= -1.0651 YZ= 3.3700 ZZ= 135.2060  
Eigenvalues: -44.6718 2.5130 135.2891

6 S Isotropic = 194.1439 Anisotropy = 473.7719  
XX= 84.6794 YX= 43.6961 ZX= -1.3440  
XY= 10.7765 YY= -11.7520 ZY= 12.6652  
XZ= -0.1119 YZ= 19.2297 ZZ= 509.5043  
Eigenvalues: -19.3736 91.8135 509.9918

7 S Isotropic = 219.2010 Anisotropy = 233.2354  
XX= 226.7348 YX= 94.9439 ZX= -4.4324  
XY= 94.4477 YY= 56.5924 ZY= 9.5964  
XZ= -8.6800 YZ= 10.1367 ZZ= 374.2759  
Eigenvalues: 13.9884 268.9235 374.6913

8 C Isotropic = 32.7577 Anisotropy = 134.9467  
XX= -6.4846 YX= 33.4805 ZX= -2.2183  
XY= 31.4800 YY= -17.8123 ZY= 4.8437  
XZ= -4.6176 YZ= 2.5935 ZZ= 122.5700  
Eigenvalues: -45.2705 20.8215 122.7222

9 C Isotropic = 54.5208 Anisotropy = 141.2346  
XX= -13.2968 YX= -23.2660 ZX= -2.5821  
XY= -24.1273 YY= 28.3820 ZY= 4.1411  
XZ= -0.9577 YZ= 4.5284 ZZ= 148.4772  
Eigenvalues: -24.0141 38.8993 148.6772

10 S Isotropic = 252.0373 Anisotropy = 125.8992  
XX= 267.4735 YX= 106.9415 ZX= -0.9441  
XY= 52.0039 YY= 152.9016 ZY= 3.1669  
S211

XZ= 5.9823 YZ= -1.8631 ZZ= 335.7368

Eigenvalues: 112.2188 307.9230 335.9701

11 C Isotropic = 31.8257 Anisotropy = 134.3918

XX= -10.2324 YX= 24.8792 ZX= -0.7532

XY= 24.6674 YY= -15.6930 ZY= 1.4455

XZ= -2.2041 YZ= -1.6830 ZZ= 121.4024

Eigenvalues: -37.8911 11.9479 121.4202

12 C Isotropic = 46.2773 Anisotropy = 142.4032

XX= -6.8970 YX= -19.3520 ZX= -0.4860

XY= -19.8032 YY= 4.5528 ZY= 1.7054

XZ= -1.1647 YZ= 2.2171 ZZ= 141.1762

Eigenvalues: -21.5712 19.1905 141.2128

13 C Isotropic = 40.7437 Anisotropy = 107.5639

XX= 84.1067 YX= 63.5094 ZX= 2.3794

XY= 58.9771 YY= -20.3417 ZY= -0.0412

XZ= 2.4021 YZ= -0.1657 ZZ= 58.4662

Eigenvalues: -48.6154 58.3936 112.4530

14 C Isotropic = 54.2899 Anisotropy = 169.6459

XX= 142.0805 YX= 53.8978 ZX= 19.8671

XY= 55.1215 YY= 47.2820 ZY= -17.9841

XZ= 16.9547 YZ= -17.2365 ZZ= -26.4930

Eigenvalues: -36.4382 31.9206 167.3871

15 C Isotropic = 53.3227 Anisotropy = 169.9585

XX= 140.6460 YX= 56.8743 ZX= -3.5783

XY= 58.1432 YY= 37.2847 ZY= 27.0587

XZ= -2.7645 YZ= 25.8942 ZZ= -17.9626

Eigenvalues: -32.8559 26.1956 166.6283

16 C Isotropic = 4.9342 Anisotropy = 119.9130

XX= 54.6781 YX= 64.5811 ZX= 3.6318

XY= 64.0988 YY= -53.0771 ZY= -0.1626

XZ= 3.9229 YZ= -0.1802 ZZ= 13.2017

Eigenvalues: -83.1506 13.0770 84.8762

17 C Isotropic = 52.8651 Anisotropy = 170.9648



XX= 139.0903 YX= 58.3090 ZX= 17.6168  
XY= 59.0030 YY= 40.9164 ZY= -20.5195  
XZ= 17.7331 YZ= -17.0584 ZZ= -21.4115  
Eigenvalues: -34.2936 26.0471 166.8416

18 C Isotropic = 54.0869 Anisotropy = 168.7305

XX= 143.4469 YX= 51.7763 ZX= -3.8559  
XY= 54.2502 YY= 42.7555 ZY= 28.6402  
XZ= -1.3904 YZ= 25.2017 ZZ= -23.9416  
Eigenvalues: -36.1133 31.8001 166.5739

19 F Isotropic = 247.8245 Anisotropy = 153.6208

XX= 332.9888 YX= 36.1123 ZX= 7.6468  
XY= 37.2136 YY= 269.7441 ZY= 6.0211  
XZ= 8.2078 YZ= 6.2753 ZZ= 140.7406  
Eigenvalues: 140.2388 252.9963 350.2384

20 C Isotropic = 50.8989 Anisotropy = 181.2179

XX= 21.7213 YX= -20.4639 ZX= -1.8609  
XY= -21.1653 YY= -40.4904 ZY= 7.2934  
XZ= -2.3507 YZ= 5.5539 ZZ= 171.4658  
Eigenvalues: -46.9525 27.9384 171.7108

21 C Isotropic = 32.4878 Anisotropy = 214.6349

XX= -69.5556 YX= -17.2774 ZX= -4.2225  
XY= -21.9605 YY= -8.1147 ZY= 6.9322  
XZ= -5.6789 YZ= 8.1087 ZZ= 175.1336  
Eigenvalues: -75.3138 -2.8006 175.5777

22 C Isotropic = 44.5519 Anisotropy = 200.6143

XX= -19.2848 YX= 44.0666 ZX= -6.0195  
XY= 44.9889 YY= -24.8459 ZY= 9.3583  
XZ= -6.2848 YZ= 9.0554 ZZ= 177.7866  
Eigenvalues: -67.1669 22.5279 178.2948

23 C Isotropic = 45.8670 Anisotropy = 188.2135

XX= 18.8449 YX= -0.5711 ZX= -2.7312  
XY= 5.3216 YY= -52.2414 ZY= 9.6448  
XZ= 1.6345 YZ= 7.8896 ZZ= 170.9975

Eigenvalues: -52.6654 18.9237 171.3426

24 C Isotropic = 51.5170 Anisotropy = 180.8280

XX= 28.0406 YX= -10.9110 ZX= -0.3452

XY= -13.4140 YY= -45.5312 ZY= 2.6456

XZ= -0.1188 YZ= 2.1575 ZZ= 172.0415

Eigenvalues: -47.5145 29.9965 172.0689

25 C Isotropic = 28.1932 Anisotropy = 217.8594

XX= -68.4119 YX= -25.4405 ZX= -0.6466

XY= -26.7353 YY= -20.3923 ZY= 2.4430

XZ= -0.2281 YZ= 3.5311 ZZ= 173.3838

Eigenvalues: -79.8595 -8.9937 173.4328

26 C Isotropic = 43.0264 Anisotropy = 202.8673

XX= -26.4773 YX= 37.9896 ZX= -1.2692

XY= 43.4247 YY= -22.6767 ZY= 2.7408

XZ= -1.3153 YZ= 2.5749 ZZ= 178.2332

Eigenvalues: -65.3600 16.1679 178.2712

27 C Isotropic = 49.7786 Anisotropy = 182.9519

XX= 31.0980 YX= 4.0080 ZX= -0.5871

XY= 5.1584 YY= -53.4673 ZY= 2.8298

XZ= 0.1997 YZ= 3.2688 ZZ= 171.7051

Eigenvalues: -53.7564 31.3457 171.7465

28 H Isotropic = 24.3326 Anisotropy = 9.0557

XX= 23.0265 YX= -1.7367 ZX= 1.1617

XY= -2.2204 YY= 25.4708 ZY= -2.2990

XZ= 2.3199 YZ= -6.5245 ZZ= 24.5006

Eigenvalues: 20.5470 22.0812 30.3698

29 H Isotropic = 23.5276 Anisotropy = 4.7148

XX= 21.6982 YX= -2.3614 ZX= -0.7232

XY= -2.3253 YY= 25.5593 ZY= 0.8772

XZ= -0.1848 YZ= -0.9964 ZZ= 23.3253

Eigenvalues: 20.5246 23.3874 26.6708

30 H Isotropic = 23.5939 Anisotropy = 4.8468

XX= 21.6211 YX= -2.4809 ZX= 0.2976

XY= -2.2530 YY= 25.7466 ZY= -1.0909  
XZ= -0.1748 YZ= 0.9829 ZZ= 23.4141  
Eigenvalues: 20.5438 23.4128 26.8252

31 H Isotropic = 24.4800 Anisotropy = 9.2311

XX= 22.9971 YX= -1.9446 ZX= -1.3457  
XY= -2.1884 YY= 25.4883 ZY= 2.2409  
XZ= -2.4285 YZ= 6.5175 ZZ= 24.9545  
Eigenvalues: 20.8327 21.9731 30.6340

32 H Isotropic = 23.3666 Anisotropy = 8.2351

XX= 28.8471 YX= 0.2902 ZX= 0.1672  
XY= 0.0968 YY= 23.2610 ZY= -0.1537  
XZ= 0.2008 YZ= -0.1734 ZZ= 17.9917  
Eigenvalues: 17.9833 23.2598 28.8567

33 H Isotropic = 23.1811 Anisotropy = 5.4621

XX= 23.8525 YX= -0.6663 ZX= 0.1173  
XY= -0.9042 YY= 26.6037 ZY= -0.3057  
XZ= 0.0758 YZ= -0.2341 ZZ= 19.0872  
Eigenvalues: 19.0766 23.6443 26.8226

34 H Isotropic = 23.8311 Anisotropy = 8.4721

XX= 27.4417 YX= 3.1407 ZX= 0.0819  
XY= 2.8508 YY= 25.0716 ZY= -0.0922  
XZ= 0.2659 YZ= -0.0878 ZZ= 18.9799  
Eigenvalues: 18.9718 23.0423 29.4791

35 H Isotropic = 24.9400 Anisotropy = 16.6166

XX= 33.7486 YX= 6.8203 ZX= 0.7985  
XY= 2.9295 YY= 25.4281 ZY= 0.1239  
XZ= 0.4132 YZ= 0.3409 ZZ= 15.6433  
Eigenvalues: 15.6225 23.1799 36.0177

36 H Isotropic = 23.5995 Anisotropy = 9.0377

XX= 29.5824 YX= 0.3838 ZX= -0.0020  
XY= 0.7027 YY= 22.6328 ZY= -0.0556  
XZ= -0.0047 YZ= -0.0869 ZZ= 18.5833  
Eigenvalues: 18.5820 22.5918 29.6246

37 H Isotropic = 23.1361 Anisotropy = 5.6810

XX= 24.0118 YX= -1.9194 ZX= 0.0171

XY= -1.6615 YY= 25.8210 ZY= -0.0977

XZ= 0.0739 YZ= -0.0548 ZZ= 19.5754

Eigenvalues: 19.5744 22.9104 26.9234

38 H Isotropic = 23.4391 Anisotropy = 5.7149

XX= 25.9638 YX= 1.5805 ZX= -0.0202

XY= 1.9512 YY= 24.8220 ZY= -0.0761

XZ= -0.0095 YZ= -0.0535 ZZ= 19.5315

Eigenvalues: 19.5307 23.5375 27.2491

39 H Isotropic = 22.9831 Anisotropy = 9.9099

XX= 29.4656 YX= -1.0989 ZX= 0.0250

XY= -0.8043 YY= 22.2821 ZY= -0.1125

XZ= 0.0282 YZ= -0.0619 ZZ= 17.2014

Eigenvalues: 17.1999 22.1596 29.5897

40 Bq Isotropic = 7.5401 Anisotropy = 15.3715

XX= 1.2676 YX= -1.0918 ZX= -0.6575

XY= -0.6962 YY= 3.7670 ZY= 1.1541

XZ= -0.5433 YZ= 1.9553 ZZ= 17.5856

Eigenvalues: 0.9802 3.8523 17.7877

41 Bq Isotropic = 6.3463 Anisotropy = 6.8605

XX= 1.8348 YX= -0.5982 ZX= -0.1916

XY= -1.6448 YY= 6.5253 ZY= 2.5152

XZ= -0.1307 YZ= -0.5407 ZZ= 10.6788

Eigenvalues: 1.5800 6.5389 10.9200

42 Bq Isotropic = 5.7176 Anisotropy = 5.7874

XX= 3.0758 YX= -3.1401 ZX= 1.3260

XY= -1.7643 YY= 5.3145 ZY= -2.8177

XZ= 0.0570 YZ= 0.1973 ZZ= 8.7625

Eigenvalues: 1.4972 6.0797 9.5759

43 Bq Isotropic = 10.1373 Anisotropy = 23.0502

XX= 2.7356 YX= 0.9860 ZX= -2.6259

XY= -0.2345 YY= 2.5387 ZY= 0.9933

XZ= -2.8584 YZ= 0.9240 ZZ= 25.1375

Eigenvalues: 1.9639 2.9438 25.5041

44 Bq Isotropic = 8.3519 Anisotropy = 17.7772

XX= 3.0868 YX= -1.1859 ZX= 1.8755

XY= -0.7628 YY= 1.9976 ZY= 0.1491

XZ= 2.0852 YZ= 0.5487 ZZ= 19.9712

Eigenvalues: 1.3297 3.5225 20.2034

## 6.29 Computed xyz-coordinates and GIAO nuclear magnetic shielding tensors of NICS(-1) calculation of compound $6^{2+}$ (Bq = ghost atom, B3LYP/6-311+G\*\*)

Charge = 2 Multiplicity = 1

|   |   |          |          |          |
|---|---|----------|----------|----------|
| C | 0 | -0.31494 | -2.24811 | 0.02175  |
| C | 0 | -0.94876 | -0.96624 | -0.01296 |
| N | 0 | -0.19463 | 0.1761   | -0.02041 |
| C | 0 | 1.16158  | 0.1907   | -0.02376 |
| C | 0 | 1.99421  | -0.95851 | -0.00646 |
| S | 0 | 1.36112  | -2.5388  | 0.03232  |
| S | 0 | -1.41285 | -3.56537 | 0.05296  |
| C | 0 | -2.77598 | -2.44779 | 0.00806  |
| C | 0 | -2.38914 | -1.08501 | -0.03123 |
| S | 0 | 2.06428  | 1.6738   | -0.03642 |
| C | 0 | 3.57927  | 0.76184  | -0.02155 |
| C | 0 | 3.38206  | -0.64056 | -0.00558 |
| C | 0 | -0.83505 | 1.49705  | -0.00011 |
| C | 0 | -1.06669 | 2.15148  | -1.20758 |
| C | 0 | -1.65016 | 3.41338  | -1.17886 |
| C | 0 | -1.97295 | 3.96831  | 0.05209  |
| C | 0 | -1.73668 | 3.32215  | 1.25832  |
| C | 0 | -1.15429 | 2.06022  | 1.2335   |
| F | 0 | -2.53915 | 5.18844  | 0.07757  |
| C | 0 | -4.10094 | -2.85681 | -0.00071 |
| C | 0 | -5.0856  | -1.8742  | -0.05725 |

|    |   |          |          |          |
|----|---|----------|----------|----------|
| C  | 0 | -4.73965 | -0.51858 | -0.10523 |
| C  | 0 | -3.41517 | -0.11514 | -0.09201 |
| C  | 0 | 4.85004  | 1.3178   | -0.02444 |
| C  | 0 | 5.93815  | 0.44681  | -0.00959 |
| C  | 0 | 5.7644   | -0.94853 | 0.0077   |
| C  | 0 | 4.49906  | -1.50177 | 0.01004  |
| H  | 0 | -0.80854 | 1.68979  | -2.15233 |
| H  | 0 | -1.85247 | 3.9576   | -2.09184 |
| H  | 0 | -2.00257 | 3.79825  | 2.19282  |
| H  | 0 | -0.95891 | 1.52798  | 2.15606  |
| H  | 0 | -4.36306 | -3.90614 | 0.03183  |
| H  | 0 | -6.12825 | -2.16655 | -0.06631 |
| H  | 0 | -5.5182  | 0.23174  | -0.15341 |
| H  | 0 | -3.19253 | 0.9372   | -0.1323  |
| H  | 0 | 4.99772  | 2.38977  | -0.0368  |
| H  | 0 | 6.94008  | 0.85795  | -0.01094 |
| H  | 0 | 6.63299  | -1.59399 | 0.01907  |
| H  | 0 | 4.37101  | -2.57737 | 0.02241  |
| Bq | 0 | 0.51443  | -1.07768 | -1.00137 |
| Bq | 0 | -1.55854 | -2.0941  | -0.99174 |
| Bq | 0 | 2.43961  | 0.1936   | -1.01868 |
| Bq | 0 | -3.73109 | -1.52338 | -1.04538 |
| Bq | 0 | 4.67254  | -0.10678 | -1.00715 |

Calculating GIAO nuclear magnetic shielding tensors.

SCF GIAO Magnetic shielding tensor (ppm):

1 C Isotropic = 9.3917 Anisotropy = 185.0070

XX= -44.5881 YX= 17.9852 ZX= -0.5833

XY= 15.5494 YY= -59.7709 ZY= 5.2661

XZ= -2.1844 YZ= 6.8789 ZZ= 132.5339

Eigenvalues: -70.7539 -33.8008 132.7297

2 C Isotropic = 35.1802 Anisotropy = 125.9955

XX= -14.0536 YX= -1.4983 ZX= -2.2998

XY= 5.2924 YY= 0.5323 ZY= 2.0009

S218

XZ= -2.5824 YZ= 3.8565 ZZ= 119.0619

Eigenvalues: -14.3549 0.7184 119.1772

3 N Isotropic = 26.0242 Anisotropy = 236.2315

XX= -36.3797 YX= 15.9117 ZX= 0.1228

XY= 7.3499 YY= -69.0467 ZY= 0.1076

XZ= -1.2875 YZ= 3.3445 ZZ= 183.4989

Eigenvalues: -72.7775 -32.6618 183.5119

4 C Isotropic = 13.6598 Anisotropy = 133.0554

XX= -43.9186 YX= 11.7932 ZX= -0.4822

XY= 9.4077 YY= -17.4294 ZY= 1.1537

XZ= -3.3524 YZ= 1.4052 ZZ= 102.3273

Eigenvalues: -47.6715 -13.7125 102.3634

5 C Isotropic = 31.0434 Anisotropy = 156.3685

XX= -40.9515 YX= 7.6994 ZX= -0.8405

XY= 17.6868 YY= -1.1241 ZY= 3.2698

XZ= -1.0651 YZ= 3.3700 ZZ= 135.2059

Eigenvalues: -44.6718 2.5130 135.2891

6 S Isotropic = 194.1439 Anisotropy = 473.7719

XX= 84.6794 YX= 43.6961 ZX= -1.3440

XY= 10.7764 YY= -11.7520 ZY= 12.6652

XZ= -0.1119 YZ= 19.2297 ZZ= 509.5044

Eigenvalues: -19.3736 91.8135 509.9918

7 S Isotropic = 219.2011 Anisotropy = 233.2354

XX= 226.7348 YX= 94.9439 ZX= -4.4324

XY= 94.4477 YY= 56.5925 ZY= 9.5964

XZ= -8.6800 YZ= 10.1367 ZZ= 374.2759

Eigenvalues: 13.9884 268.9235 374.6913

8 C Isotropic = 32.7577 Anisotropy = 134.9467

XX= -6.4846 YX= 33.4805 ZX= -2.2183

XY= 31.4800 YY= -17.8123 ZY= 4.8437

XZ= -4.6176 YZ= 2.5935 ZZ= 122.5700

Eigenvalues: -45.2705 20.8215 122.7222

9 C Isotropic = 54.5208 Anisotropy = 141.2346

XX= -13.2968 YX= -23.2660 ZX= -2.5821  
XY= -24.1273 YY= 28.3820 ZY= 4.1411  
XZ= -0.9577 YZ= 4.5284 ZZ= 148.4772  
Eigenvalues: -24.0141 38.8993 148.6772

10 S Isotropic = 252.0373 Anisotropy = 125.8992

XX= 267.4735 YX= 106.9415 ZX= -0.9441  
XY= 52.0039 YY= 152.9017 ZY= 3.1669  
XZ= 5.9823 YZ= -1.8631 ZZ= 335.7368  
Eigenvalues: 112.2189 307.9230 335.9701

11 C Isotropic = 31.8257 Anisotropy = 134.3918

XX= -10.2324 YX= 24.8792 ZX= -0.7532  
XY= 24.6674 YY= -15.6930 ZY= 1.4455  
XZ= -2.2041 YZ= -1.6830 ZZ= 121.4024  
Eigenvalues: -37.8911 11.9479 121.4202

12 C Isotropic = 46.2773 Anisotropy = 142.4032

XX= -6.8970 YX= -19.3520 ZX= -0.4860  
XY= -19.8033 YY= 4.5528 ZY= 1.7054  
XZ= -1.1647 YZ= 2.2171 ZZ= 141.1762  
Eigenvalues: -21.5712 19.1905 141.2128

13 C Isotropic = 40.7437 Anisotropy = 107.5639

XX= 84.1067 YX= 63.5094 ZX= 2.3794  
XY= 58.9771 YY= -20.3417 ZY= -0.0412  
XZ= 2.4021 YZ= -0.1657 ZZ= 58.4662  
Eigenvalues: -48.6154 58.3936 112.4530

14 C Isotropic = 54.2899 Anisotropy = 169.6460

XX= 142.0806 YX= 53.8978 ZX= 19.8671  
XY= 55.1215 YY= 47.2820 ZY= -17.9841  
XZ= 16.9547 YZ= -17.2365 ZZ= -26.4930  
Eigenvalues: -36.4382 31.9206 167.3872

15 C Isotropic = 53.3227 Anisotropy = 169.9585

XX= 140.6460 YX= 56.8743 ZX= -3.5783  
XY= 58.1432 YY= 37.2847 ZY= 27.0587  
XZ= -2.7645 YZ= 25.8942 ZZ= -17.9626



Eigenvalues: -32.8559 26.1956 166.6283

16 C Isotropic = 4.9342 Anisotropy = 119.9130

XX= 54.6781 YX= 64.5811 ZX= 3.6318

XY= 64.0988 YY= -53.0771 ZY= -0.1626

XZ= 3.9229 YZ= -0.1802 ZZ= 13.2017

Eigenvalues: -83.1506 13.0770 84.8762

17 C Isotropic = 52.8651 Anisotropy = 170.9648

XX= 139.0903 YX= 58.3090 ZX= 17.6168

XY= 59.0030 YY= 40.9164 ZY= -20.5195

XZ= 17.7331 YZ= -17.0584 ZZ= -21.4115

Eigenvalues: -34.2936 26.0471 166.8416

18 C Isotropic = 54.0869 Anisotropy = 168.7305

XX= 143.4469 YX= 51.7763 ZX= -3.8559

XY= 54.2502 YY= 42.7555 ZY= 28.6402

XZ= -1.3904 YZ= 25.2017 ZZ= -23.9416

Eigenvalues: -36.1133 31.8001 166.5739

19 F Isotropic = 247.8245 Anisotropy = 153.6208

XX= 332.9888 YX= 36.1123 ZX= 7.6468

XY= 37.2136 YY= 269.7441 ZY= 6.0211

XZ= 8.2078 YZ= 6.2753 ZZ= 140.7406

Eigenvalues: 140.2388 252.9963 350.2384

20 C Isotropic = 50.8989 Anisotropy = 181.2179

XX= 21.7213 YX= -20.4639 ZX= -1.8609

XY= -21.1653 YY= -40.4904 ZY= 7.2934

XZ= -2.3507 YZ= 5.5539 ZZ= 171.4658

Eigenvalues: -46.9525 27.9384 171.7108

21 C Isotropic = 32.4878 Anisotropy = 214.6349

XX= -69.5556 YX= -17.2774 ZX= -4.2225

XY= -21.9605 YY= -8.1147 ZY= 6.9322

XZ= -5.6789 YZ= 8.1087 ZZ= 175.1336

Eigenvalues: -75.3138 -2.8006 175.5777

22 C Isotropic = 44.5519 Anisotropy = 200.6143

XX= -19.2848 YX= 44.0666 ZX= -6.0195

XY= 44.9889 YY= -24.8459 ZY= 9.3583  
XZ= -6.2848 YZ= 9.0554 ZZ= 177.7866  
Eigenvalues: -67.1669 22.5279 178.2948

23 C Isotropic = 45.8670 Anisotropy = 188.2135

XX= 18.8449 YX= -0.5711 ZX= -2.7312  
XY= 5.3216 YY= -52.2415 ZY= 9.6448  
XZ= 1.6345 YZ= 7.8896 ZZ= 170.9975  
Eigenvalues: -52.6654 18.9237 171.3426

24 C Isotropic = 51.5170 Anisotropy = 180.8279

XX= 28.0406 YX= -10.9109 ZX= -0.3452  
XY= -13.4140 YY= -45.5311 ZY= 2.6456  
XZ= -0.1188 YZ= 2.1575 ZZ= 172.0415  
Eigenvalues: -47.5145 29.9965 172.0690

25 C Isotropic = 28.1932 Anisotropy = 217.8594

XX= -68.4119 YX= -25.4405 ZX= -0.6466  
XY= -26.7352 YY= -20.3923 ZY= 2.4430  
XZ= -0.2281 YZ= 3.5311 ZZ= 173.3838  
Eigenvalues: -79.8595 -8.9937 173.4328

26 C Isotropic = 43.0264 Anisotropy = 202.8673

XX= -26.4773 YX= 37.9896 ZX= -1.2692  
XY= 43.4247 YY= -22.6767 ZY= 2.7408  
XZ= -1.3153 YZ= 2.5749 ZZ= 178.2332  
Eigenvalues: -65.3600 16.1679 178.2712

27 C Isotropic = 49.7786 Anisotropy = 182.9519

XX= 31.0980 YX= 4.0080 ZX= -0.5871  
XY= 5.1584 YY= -53.4673 ZY= 2.8298  
XZ= 0.1997 YZ= 3.2688 ZZ= 171.7051  
Eigenvalues: -53.7564 31.3457 171.7465

28 H Isotropic = 24.3326 Anisotropy = 9.0557

XX= 23.0265 YX= -1.7367 ZX= 1.1617  
XY= -2.2204 YY= 25.4708 ZY= -2.2990  
XZ= 2.3199 YZ= -6.5245 ZZ= 24.5006  
Eigenvalues: 20.5470 22.0812 30.3698

29 H Isotropic = 23.5276 Anisotropy = 4.7148

XX= 21.6982 YX= -2.3614 ZX= -0.7232

XY= -2.3253 YY= 25.5593 ZY= 0.8772

XZ= -0.1848 YZ= -0.9964 ZZ= 23.3253

Eigenvalues: 20.5246 23.3874 26.6708

30 H Isotropic = 23.5939 Anisotropy = 4.8468

XX= 21.6211 YX= -2.4809 ZX= 0.2976

XY= -2.2530 YY= 25.7466 ZY= -1.0909

XZ= -0.1748 YZ= 0.9829 ZZ= 23.4141

Eigenvalues: 20.5438 23.4128 26.8252

31 H Isotropic = 24.4800 Anisotropy = 9.2311

XX= 22.9971 YX= -1.9446 ZX= -1.3457

XY= -2.1884 YY= 25.4883 ZY= 2.2409

XZ= -2.4285 YZ= 6.5175 ZZ= 24.9545

Eigenvalues: 20.8327 21.9731 30.6340

32 H Isotropic = 23.3666 Anisotropy = 8.2351

XX= 28.8471 YX= 0.2902 ZX= 0.1672

XY= 0.0968 YY= 23.2610 ZY= -0.1537

XZ= 0.2008 YZ= -0.1734 ZZ= 17.9917

Eigenvalues: 17.9833 23.2598 28.8567

33 H Isotropic = 23.1811 Anisotropy = 5.4621

XX= 23.8525 YX= -0.6663 ZX= 0.1173

XY= -0.9042 YY= 26.6037 ZY= -0.3057

XZ= 0.0758 YZ= -0.2341 ZZ= 19.0872

Eigenvalues: 19.0766 23.6443 26.8226

34 H Isotropic = 23.8311 Anisotropy = 8.4721

XX= 27.4417 YX= 3.1407 ZX= 0.0819

XY= 2.8508 YY= 25.0716 ZY= -0.0922

XZ= 0.2659 YZ= -0.0878 ZZ= 18.9799

Eigenvalues: 18.9718 23.0423 29.4791

35 H Isotropic = 24.9400 Anisotropy = 16.6166

XX= 33.7486 YX= 6.8203 ZX= 0.7985

XY= 2.9295 YY= 25.4281 ZY= 0.1239

XZ= 0.4132 YZ= 0.3409 ZZ= 15.6433

Eigenvalues: 15.6225 23.1799 36.0177

36 H Isotropic = 23.5995 Anisotropy = 9.0377

XX= 29.5824 YX= 0.3838 ZX= -0.0020

XY= 0.7026 YY= 22.6328 ZY= -0.0556

XZ= -0.0047 YZ= -0.0869 ZZ= 18.5833

Eigenvalues: 18.5820 22.5918 29.6246

37 H Isotropic = 23.1361 Anisotropy = 5.6810

XX= 24.0118 YX= -1.9194 ZX= 0.0171

XY= -1.6615 YY= 25.8210 ZY= -0.0977

XZ= 0.0739 YZ= -0.0548 ZZ= 19.5754

Eigenvalues: 19.5744 22.9104 26.9234

38 H Isotropic = 23.4391 Anisotropy = 5.7149

XX= 25.9638 YX= 1.5805 ZX= -0.0202

XY= 1.9512 YY= 24.8220 ZY= -0.0761

XZ= -0.0095 YZ= -0.0535 ZZ= 19.5315

Eigenvalues: 19.5307 23.5375 27.2491

39 H Isotropic = 22.9831 Anisotropy = 9.9099

XX= 29.4656 YX= -1.0989 ZX= 0.0250

XY= -0.8043 YY= 22.2821 ZY= -0.1125

XZ= 0.0282 YZ= -0.0619 ZZ= 17.2014

Eigenvalues: 17.1999 22.1596 29.5897

40 Bq Isotropic = 7.4304 Anisotropy = 15.1734

XX= 1.3829 YX= -0.7547 ZX= 0.3334

XY= -0.6280 YY= 3.4521 ZY= -0.6029

XZ= 0.2826 YZ= -1.5431 ZZ= 17.4562

Eigenvalues: 1.1731 3.5721 17.5460

41 Bq Isotropic = 6.4577 Anisotropy = 7.0086

XX= 2.1056 YX= -0.9430 ZX= 0.2913

XY= -1.9558 YY= 6.2747 ZY= -2.5074

XZ= -0.4163 YZ= 0.8967 ZZ= 10.9928

Eigenvalues: 1.6415 6.6016 11.1301

42 Bq Isotropic = 5.6636 Anisotropy = 5.9474

XX= 3.0317 YX= -3.1155 ZX= -1.4947  
XY= -1.8758 YY= 5.2743 ZY= 3.0078  
XZ= -0.1861 YZ= -0.2654 ZZ= 8.6849  
Eigenvalues: 1.4168 5.9455 9.6286

43 Bq Isotropic = 10.2275 Anisotropy = 23.4260

XX= 2.6074 YX= 0.9351 ZX= 1.8044  
XY= -0.4152 YY= 2.4420 ZY= 0.5773  
XZ= 2.2247 YZ= 1.2383 ZZ= 25.6332  
Eigenvalues: 2.2381 2.5997 25.8449

44 Bq Isotropic = 8.3271 Anisotropy = 17.8155

XX= 3.0724 YX= -1.2120 ZX= -2.0637  
XY= -0.8360 YY= 1.9798 ZY= 0.4374  
XZ= -2.2410 YZ= -0.1191 ZZ= 19.9292  
Eigenvalues: 1.3103 3.4670 20.2042

### 6.30 Computed xyz-coordinates and GIAO nuclear magnetic shielding tensors of NICS(0) calculation of compound $7^{2+}$ (Bq = ghost atom, B3LYP/6-311+G\*\*)

Charge = 2 Multiplicity = 1

|   |   |          |          |          |
|---|---|----------|----------|----------|
| C | 0 | -0.00006 | -1.44213 | 1.33375  |
| C | 0 | -0.00005 | -0.02803 | 1.18959  |
| N | 0 | -0.00004 | 0.61855  | 0.00000  |
| C | 0 | -0.00005 | -0.02803 | -1.18959 |
| C | 0 | -0.00006 | -1.44213 | -1.33375 |
| S | 0 | -0.00011 | -2.5084  | 0.00000  |
| C | 0 | 0.00002  | 2.08538  | 0.00000  |
| C | 0 | -1.22347 | 2.75205  | 0.00000  |
| C | 0 | -1.22080 | 4.14167  | 0.00000  |
| C | 0 | 0.00013  | 4.80285  | 0.00000  |
| C | 0 | 1.22100  | 4.14156  | 0.00000  |
| C | 0 | 1.22357  | 2.75195  | 0.00000  |
| C | 0 | -0.00003 | -0.72656 | -3.56578 |

|    |   |          |          |          |
|----|---|----------|----------|----------|
| C  | 0 | -0.00004 | -1.84816 | -2.69951 |
| S  | 0 | -0.00006 | 0.81796  | -2.69964 |
| C  | 0 | 0.00000  | -0.87216 | -4.94475 |
| C  | 0 | 0.00004  | -2.16779 | -5.46011 |
| C  | 0 | 0.00005  | -3.29387 | -4.61916 |
| C  | 0 | 0.00001  | -3.14786 | -3.24558 |
| C  | 0 | -0.00004 | -1.84816 | 2.69951  |
| C  | 0 | -0.00003 | -0.72656 | 3.56578  |
| S  | 0 | -0.00006 | 0.81796  | 2.69964  |
| C  | 0 | 0.00001  | -3.14786 | 3.24558  |
| C  | 0 | 0.00005  | -3.29387 | 4.61916  |
| C  | 0 | 0.00004  | -2.16779 | 5.46011  |
| C  | 0 | 0.00000  | -0.87216 | 4.94475  |
| F  | 0 | 0.00019  | 6.14827  | 0.00000  |
| H  | 0 | -2.15515 | 2.20044  | 0.00000  |
| H  | 0 | -2.14496 | 4.70407  | 0.00000  |
| H  | 0 | 2.14521  | 4.7039   | 0.00000  |
| H  | 0 | 2.1552   | 2.20026  | 0.00000  |
| H  | 0 | 0.00000  | -0.01459 | -5.60478 |
| H  | 0 | 0.00006  | -2.3055  | -6.5343  |
| H  | 0 | 0.00008  | -4.28484 | -5.05405 |
| H  | 0 | 0.00003  | -4.01865 | -2.60198 |
| H  | 0 | 0.00003  | -4.01865 | 2.60198  |
| H  | 0 | 0.00008  | -4.28484 | 5.05405  |
| H  | 0 | 0.00006  | -2.3055  | 6.5343   |
| H  | 0 | 0.00000  | -0.01459 | 5.60478  |
| Bq | 0 | -0.00006 | -0.80503 | 0.00000  |
| Bq | 0 | -0.00005 | -0.64539 | 2.29766  |
| Bq | 0 | -0.00005 | -0.64539 | -2.29766 |
| Bq | 0 | 0.00001  | -2.0094  | 4.08915  |
| Bq | 0 | 0.00001  | -2.0094  | -4.08915 |

Calculating GIAO nuclear magnetic shielding tensors.

SCF GIAO Magnetic shielding tensor (ppm):

S226

1 C Isotropic = 31.6297 Anisotropy = 155.5934  
XX= 135.3586 YX= 0.0030 ZX= 0.0000  
XY= -0.0008 YY= -20.8366 ZY= 28.4124  
XZ= -0.0034 YZ= 17.3730 ZZ= -19.6329  
Eigenvalues: -43.1353 2.6659 135.3586

2 C Isotropic = 14.9744 Anisotropy = 135.9760  
XX= 105.6251 YX= 0.0011 ZX= -0.0017  
XY= -0.0011 YY= -34.3519 ZY= 13.6703  
XZ= 0.0017 YZ= 19.5442 ZZ= -26.3500  
Eigenvalues: -47.4334 -13.2686 105.6251

3 N Isotropic = 18.1822 Anisotropy = 252.4910  
XX= 186.5096 YX= 0.0012 ZX= -0.0000  
XY= -0.0076 YY= -91.3892 ZY= 0.0000  
XZ= 0.0000 YZ= 0.0000 ZZ= -40.5738  
Eigenvalues: -91.3892 -40.5738 186.5096

4 C Isotropic = 14.9744 Anisotropy = 135.9760  
XX= 105.6251 YX= 0.0011 ZX= 0.0017  
XY= -0.0011 YY= -34.3520 ZY= -13.6703  
XZ= -0.0017 YZ= -19.5442 ZZ= -26.3500  
Eigenvalues: -47.4334 -13.2686 105.6251

5 C Isotropic = 31.6297 Anisotropy = 155.5934  
XX= 135.3586 YX= 0.0030 ZX= -0.0000  
XY= -0.0008 YY= -20.8366 ZY= -28.4124  
XZ= 0.0034 YZ= -17.3730 ZZ= -19.6329  
Eigenvalues: -43.1353 2.6659 135.3586

6 S Isotropic = 227.0636 Anisotropy = 454.4424  
XX= 530.0252 YX= 0.0039 ZX= -0.0000  
XY= -0.0147 YY= 49.7176 ZY= 0.0000  
XZ= 0.0000 YZ= -0.0000 ZZ= 101.4480  
Eigenvalues: 49.7176 101.4480 530.0252

7 C Isotropic = 40.2839 Anisotropy = 104.8051  
XX= 51.6604 YX= -0.0035 ZX= 0.0000  
XY= -0.0038 YY= -40.9627 ZY= 0.0000  
Eigenvalues: 51.6604 -40.9627 0.0000

XZ= -0.0000 YZ= -0.0000 ZZ= 110.1540

Eigenvalues: -40.9627 51.6604 110.1540

8 C Isotropic = 52.0766 Anisotropy = 168.1106

XX= -31.6214 YX= -28.4703 ZX= -0.0000

XY= -27.5246 YY= 23.7009 ZY= 0.0000

XZ= 0.0000 YZ= 0.0000 ZZ= 164.1504

Eigenvalues: -43.3175 35.3970 164.1504

9 C Isotropic = 55.5472 Anisotropy = 168.9673

XX= -14.4124 YX= 25.6475 ZX= -0.0000

XY= 26.7314 YY= 12.8619 ZY= 0.0000

XZ= 0.0000 YZ= -0.0000 ZZ= 168.1921

Eigenvalues: -30.3025 28.7520 168.1921

10 C Isotropic = 3.9431 Anisotropy = 120.0812

XX= 13.2753 YX= -0.0035 ZX= -0.0000

XY= -0.0046 YY= -85.4432 ZY= 0.0000

XZ= -0.0000 YZ= 0.0000 ZZ= 83.9973

Eigenvalues: -85.4432 13.2753 83.9973

11 C Isotropic = 55.5461 Anisotropy = 168.9674

XX= -14.4189 YX= -25.6461 ZX= 0.0000

XY= -26.7294 YY= 12.8661 ZY= 0.0000

XZ= -0.0000 YZ= -0.0000 ZZ= 168.1910

Eigenvalues: -30.3046 28.7518 168.1910

12 C Isotropic = 52.0753 Anisotropy = 168.1082

XX= -31.6187 YX= 28.4747 ZX= 0.0000

XY= 27.5295 YY= 23.6971 ZY= 0.0000

XZ= -0.0000 YZ= 0.0000 ZZ= 164.1474

Eigenvalues: -43.3191 35.3975 164.1474

13 C Isotropic = 31.8833 Anisotropy = 133.8335

XX= 121.1056 YX= -0.0013 ZX= 0.0082

XY= 0.0021 YY= -35.9409 ZY= -12.8727

XZ= 0.0020 YZ= -10.9252 ZZ= 10.4853

Eigenvalues: -38.8129 13.3573 121.1056

14 C Isotropic = 45.6633 Anisotropy = 144.0725



XX= 141.7116 YX= 0.0033 ZX= 0.0012  
XY= 0.0027 YY= 16.9661 ZY= 4.5776  
XZ= 0.0043 YZ= 5.1366 ZZ= -21.6879  
Eigenvalues: -22.2888 17.5671 141.7116

15 S Isotropic = 257.0829 Anisotropy = 136.3820

XX= 348.0043 YX= 0.0057 ZX= 0.0050  
XY= 0.0060 YY= 118.4180 ZY= 32.9938  
XZ= 0.0042 YZ= -16.8338 ZZ= 304.8266  
Eigenvalues: 118.0684 305.1762 348.0043

16 C Isotropic = 50.4658 Anisotropy = 180.1892

XX= 170.5919 YX= 0.0013 ZX= 0.0040  
XY= 0.0028 YY= -18.3012 ZY= 38.8605  
XZ= 0.0030 YZ= 37.0287 ZZ= -0.8934  
Eigenvalues: -48.5274 29.3327 170.5919

17 C Isotropic = 28.3720 Anisotropy = 217.3149

XX= 173.2486 YX= 0.0036 ZX= 0.0017  
XY= 0.0041 YY= -9.5437 ZY= -6.2660  
XZ= 0.0054 YZ= -8.0777 ZZ= -78.5888  
Eigenvalues: -79.3259 -8.8066 173.2486

18 C Isotropic = 42.9484 Anisotropy = 201.7566

XX= 177.4527 YX= 0.0062 ZX= 0.0048  
XY= 0.0065 YY= -58.4002 ZY= -25.2555  
XZ= 0.0041 YZ= -20.3289 ZZ= 9.7926  
Eigenvalues: -65.3166 16.7090 177.4527

19 C Isotropic = 49.3494 Anisotropy = 182.3722

XX= 170.9308 YX= 0.0107 ZX= 0.0059  
XY= 0.0057 YY= -36.8562 ZY= 35.2301  
XZ= 0.0024 YZ= 34.5112 ZZ= 13.9734  
Eigenvalues: -54.5908 31.7081 170.9308

20 C Isotropic = 45.6633 Anisotropy = 144.0725

XX= 141.7116 YX= 0.0033 ZX= -0.0012  
XY= 0.0027 YY= 16.9661 ZY= -4.5776  
XZ= -0.0043 YZ= -5.1366 ZZ= -21.6879

Eigenvalues: -22.2888 17.5671 141.7116

21 C Isotropic = 31.8833 Anisotropy = 133.8335

XX= 121.1056 YX= -0.0013 ZX= -0.0082

XY= 0.0021 YY= -35.9409 ZY= 12.8727

XZ= -0.0020 YZ= 10.9252 ZZ= 10.4853

Eigenvalues: -38.8129 13.3573 121.1056

22 S Isotropic = 257.0829 Anisotropy = 136.3820

XX= 348.0043 YX= 0.0057 ZX= -0.0050

XY= 0.0060 YY= 118.4180 ZY= -32.9938

XZ= -0.0042 YZ= 16.8338 ZZ= 304.8266

Eigenvalues: 118.0684 305.1762 348.0043

23 C Isotropic = 49.3494 Anisotropy = 182.3722

XX= 170.9308 YX= 0.0107 ZX= -0.0059

XY= 0.0057 YY= -36.8562 ZY= -35.2301

XZ= -0.0024 YZ= -34.5112 ZZ= 13.9734

Eigenvalues: -54.5908 31.7081 170.9308

24 C Isotropic = 42.9484 Anisotropy = 201.7566

XX= 177.4527 YX= 0.0062 ZX= -0.0048

XY= 0.0065 YY= -58.4002 ZY= 25.2555

XZ= -0.0041 YZ= 20.3289 ZZ= 9.7926

Eigenvalues: -65.3166 16.7090 177.4527

25 C Isotropic = 28.3720 Anisotropy = 217.3149

XX= 173.2486 YX= 0.0036 ZX= -0.0017

XY= 0.0041 YY= -9.5437 ZY= 6.2660

XZ= -0.0054 YZ= 8.0777 ZZ= -78.5888

Eigenvalues: -79.3259 -8.8066 173.2486

26 C Isotropic = 50.4658 Anisotropy = 180.1892

XX= 170.5919 YX= 0.0013 ZX= -0.0040

XY= 0.0028 YY= -18.3012 ZY= -38.8605

XZ= -0.0030 YZ= -37.0287 ZZ= -0.8934

Eigenvalues: -48.5274 29.3327 170.5919

27 F Isotropic = 247.4593 Anisotropy = 158.1882

XX= 138.1475 YX= 0.0057 ZX= 0.0000

XY= 0.0050 YY= 251.3123 ZY= 0.0000  
XZ= -0.0000 YZ= 0.0000 ZZ= 352.9181  
Eigenvalues: 138.1475 251.3123 352.9181

28 H Isotropic = 24.3206 Anisotropy = 9.4554  
XX= 24.6129 YX= -6.8356 ZX= -0.0000  
XY= -2.9307 YY= 26.6575 ZY= 0.0000  
XZ= -0.0000 YZ= -0.0000 ZZ= 21.6913  
Eigenvalues: 20.6462 21.6913 30.6241

29 H Isotropic = 23.8604 Anisotropy = 4.7176  
XX= 24.0033 YX= -0.3332 ZX= -0.0000  
XY= 1.1054 YY= 26.9558 ZY= 0.0000  
XZ= -0.0000 YZ= 0.0000 ZZ= 20.6220  
Eigenvalues: 20.6220 23.9536 27.0054

30 H Isotropic = 23.8604 Anisotropy = 4.7178  
XX= 24.0032 YX= 0.3334 ZX= 0.0000  
XY= -1.1053 YY= 26.9560 ZY= 0.0000  
XZ= 0.0000 YZ= 0.0000 ZZ= 20.6221  
Eigenvalues: 20.6221 23.9536 27.0056

31 H Isotropic = 24.3207 Anisotropy = 9.4556  
XX= 24.6136 YX= 6.8359 ZX= 0.0000  
XY= 2.9307 YY= 26.6572 ZY= 0.0000  
XZ= 0.0000 YZ= -0.0000 ZZ= 21.6912  
Eigenvalues: 20.6464 21.6912 30.6244

32 H Isotropic = 23.5691 Anisotropy = 8.8041  
XX= 18.5420 YX= -0.0002 ZX= -0.0002  
XY= -0.0001 YY= 23.9457 ZY= 2.3645  
XZ= -0.0001 YZ= 2.8105 ZZ= 28.2196  
Eigenvalues: 18.5420 22.7268 29.4385

33 H Isotropic = 23.0893 Anisotropy = 5.6620  
XX= 19.5159 YX= -0.0002 ZX= -0.0003  
XY= -0.0001 YY= 26.8635 ZY= -0.0912  
XZ= -0.0000 YZ= 0.1802 ZZ= 22.8885  
Eigenvalues: 19.5159 22.8880 26.8640

34 H Isotropic = 23.4109 Anisotropy = 5.7935

XX= 19.5273 YX= -0.0001 ZX= -0.0001

XY= -0.0000 YY= 23.4864 ZY= -0.5831

XZ= -0.0001 YZ= -0.3228 ZZ= 27.2191

Eigenvalues: 19.5273 23.4322 27.2733

35 H Isotropic = 22.9697 Anisotropy = 10.0549

XX= 17.1347 YX= -0.0006 ZX= -0.0006

XY= -0.0002 YY= 24.7282 ZY= 3.5123

XZ= -0.0002 YZ= 3.6956 ZZ= 27.0462

Eigenvalues: 17.1347 22.1015 29.6729

36 H Isotropic = 22.9697 Anisotropy = 10.0549

XX= 17.1347 YX= -0.0006 ZX= 0.0006

XY= -0.0002 YY= 24.7282 ZY= -3.5123

XZ= 0.0002 YZ= -3.6956 ZZ= 27.0462

Eigenvalues: 17.1347 22.1015 29.6729

37 H Isotropic = 23.4109 Anisotropy = 5.7935

XX= 19.5273 YX= -0.0001 ZX= 0.0001

XY= -0.0000 YY= 23.4864 ZY= 0.5831

XZ= 0.0001 YZ= 0.3228 ZZ= 27.2191

Eigenvalues: 19.5273 23.4322 27.2733

38 H Isotropic = 23.0893 Anisotropy = 5.6620

XX= 19.5159 YX= -0.0002 ZX= 0.0003

XY= -0.0001 YY= 26.8635 ZY= 0.0912

XZ= 0.0000 YZ= -0.1802 ZZ= 22.8885

Eigenvalues: 19.5159 22.8880 26.8640

39 H Isotropic = 23.5691 Anisotropy = 8.8041

XX= 18.5420 YX= -0.0002 ZX= 0.0002

XY= -0.0001 YY= 23.9457 ZY= -2.3645

XZ= 0.0001 YZ= -2.8105 ZZ= 28.2196

Eigenvalues: 18.5420 22.7268 29.4385

40 Bq Isotropic = 6.6419 Anisotropy = 11.4192

XX= 0.8545 YX= -0.0004 ZX= -0.0000

XY= 0.0006 YY= 14.2546 ZY= -0.0000

XZ= -0.0000 YZ= 0.0000 ZZ= 4.8164

Eigenvalues: 0.8545 4.8164 14.2546

41 Bq Isotropic = 6.4954 Anisotropy = 27.0951

XX= -14.1318 YX= 0.0004 ZX= 0.0002

XY= -0.0004 YY= 23.8866 ZY= 4.1438

XZ= 0.0001 YZ= 2.1705 ZZ= 9.7315

Eigenvalues: -14.1318 9.0592 24.5588

42 Bq Isotropic = 6.4954 Anisotropy = 27.0951

XX= -14.1318 YX= 0.0004 ZX= -0.0002

XY= -0.0004 YY= 23.8866 ZY= -4.1438

XZ= -0.0001 YZ= -2.1705 ZZ= 9.7315

Eigenvalues: -14.1318 9.0592 24.5588

43 Bq Isotropic = 6.0240 Anisotropy = 3.2078

XX= 3.7370 YX= -0.0001 ZX= 0.0005

XY= -0.0002 YY= 7.7566 ZY= -0.5926

XZ= 0.0001 YZ= -1.0112 ZZ= 6.5786

Eigenvalues: 3.7370 6.1726 8.1626

44 Bq Isotropic = 6.0240 Anisotropy = 3.2078

XX= 3.7370 YX= -0.0001 ZX= -0.0005

XY= -0.0002 YY= 7.7566 ZY= 0.5926

XZ= -0.0001 YZ= 1.0112 ZZ= 6.5786

Eigenvalues: 3.7370 6.1726 8.1626

### 6.31 Computed xyz-coordinates and GIAO nuclear magnetic shielding tensors of NICS(1) calculation of compound $7^{2+}$ (Bq = ghost atom, B3LYP/6-311+G<sup>\*\*</sup>)

Charge = 2 Multiplicity = 1

C 0 -0.00006 -1.44213 1.33375

C 0 -0.00005 -0.02803 1.18959

N 0 -0.00004 0.61855 0.00000

C 0 -0.00005 -0.02803 -1.18959

C 0 -0.00006 -1.44213 -1.33375

|   |   |          |          |          |
|---|---|----------|----------|----------|
| S | 0 | -0.00011 | -2.5084  | 0.00000  |
| C | 0 | 0.00002  | 2.08538  | 0.00000  |
| C | 0 | -1.22347 | 2.75205  | 0.00000  |
| C | 0 | -1.2208  | 4.14167  | 0.00000  |
| C | 0 | 0.00013  | 4.80285  | 0.00000  |
| C | 0 | 1.221    | 4.14156  | 0.00000  |
| C | 0 | 1.22357  | 2.75195  | 0.00000  |
| C | 0 | -0.00003 | -0.72656 | -3.56578 |
| C | 0 | -0.00004 | -1.84816 | -2.69951 |
| S | 0 | -0.00006 | 0.81796  | -2.69964 |
| C | 0 | 0.00000  | -0.87216 | -4.94475 |
| C | 0 | 0.00004  | -2.16779 | -5.46011 |
| C | 0 | 0.00005  | -3.29387 | -4.61916 |
| C | 0 | 0.00001  | -3.14786 | -3.24558 |
| C | 0 | -0.00004 | -1.84816 | 2.69951  |
| C | 0 | -0.00003 | -0.72656 | 3.56578  |
| S | 0 | -0.00006 | 0.81796  | 2.69964  |
| C | 0 | 0.00001  | -3.14786 | 3.24558  |
| C | 0 | 0.00005  | -3.29387 | 4.61916  |
| C | 0 | 0.00004  | -2.16779 | 5.46011  |
| C | 0 | 0.00000  | -0.87216 | 4.94475  |
| F | 0 | 0.00019  | 6.14827  | 0.00000  |
| H | 0 | -2.15515 | 2.20044  | 0.00000  |
| H | 0 | -2.14496 | 4.70407  | 0.00000  |
| H | 0 | 2.14521  | 4.7039   | 0.00000  |
| H | 0 | 2.1552   | 2.20026  | 0.00000  |
| H | 0 | 0.00000  | -0.01459 | -5.60478 |
| H | 0 | 0.00006  | -2.3055  | -6.5343  |
| H | 0 | 0.00008  | -4.28484 | -5.05405 |
| H | 0 | 0.00003  | -4.01865 | -2.60198 |
| H | 0 | 0.00003  | -4.01865 | 2.60198  |
| H | 0 | 0.00008  | -4.28484 | 5.05405  |
| H | 0 | 0.00006  | -2.3055  | 6.5343   |

|    |   |         |          |          |
|----|---|---------|----------|----------|
| H  | 0 | 0.00000 | -0.01459 | 5.60478  |
| Bq | 0 | 0.99994 | -0.80504 | 0.00000  |
| Bq | 0 | 0.99995 | -0.64538 | 2.29764  |
| Bq | 0 | 0.99995 | -0.64538 | -2.29764 |
| Bq | 0 | 1.00001 | -2.00938 | 4.08913  |
| Bq | 0 | 1.00001 | -2.00938 | -4.08913 |

Calculating GIAO nuclear magnetic shielding tensors.

SCF GIAO Magnetic shielding tensor (ppm):

1 C Isotropic = 31.6297 Anisotropy = 155.5934

XX= 135.3586 YX= 0.0030 ZX= 0.0000

XY= -0.0008 YY= -20.8366 ZY= 28.4124

XZ= -0.0034 YZ= 17.3730 ZZ= -19.6329

Eigenvalues: -43.1353 2.6659 135.3586

2 C Isotropic = 14.9744 Anisotropy = 135.9760

XX= 105.6251 YX= 0.0011 ZX= -0.0017

XY= -0.0011 YY= -34.3519 ZY= 13.6703

XZ= 0.0017 YZ= 19.5442 ZZ= -26.3500

Eigenvalues: -47.4334 -13.2686 105.6251

3 N Isotropic = 18.1822 Anisotropy = 252.4910

XX= 186.5096 YX= 0.0012 ZX= -0.0000

XY= -0.0076 YY= -91.3892 ZY= 0.0000

XZ= 0.0000 YZ= 0.0000 ZZ= -40.5738

Eigenvalues: -91.3892 -40.5738 186.5096

4 C Isotropic = 14.9744 Anisotropy = 135.9760

XX= 105.6251 YX= 0.0011 ZX= 0.0017

XY= -0.0011 YY= -34.3519 ZY= -13.6703

XZ= -0.0017 YZ= -19.5442 ZZ= -26.3500

Eigenvalues: -47.4334 -13.2686 105.6251

5 C Isotropic = 31.6297 Anisotropy = 155.5934

XX= 135.3586 YX= 0.0030 ZX= -0.0000

XY= -0.0008 YY= -20.8366 ZY= -28.4124

XZ= 0.0034 YZ= -17.3730 ZZ= -19.6329

Eigenvalues: -43.1353 2.6659 135.3586

6 S Isotropic = 227.0636 Anisotropy = 454.4424

XX= 530.0252 YX= 0.0039 ZX= -0.0000

XY= -0.0147 YY= 49.7176 ZY= 0.0000

XZ= 0.0000 YZ= -0.0000 ZZ= 101.4480

Eigenvalues: 49.7176 101.4480 530.0252

7 C Isotropic = 40.2839 Anisotropy = 104.8051

XX= 51.6604 YX= -0.0035 ZX= 0.0000

XY= -0.0038 YY= -40.9627 ZY= 0.0000

XZ= -0.0000 YZ= -0.0000 ZZ= 110.1540

Eigenvalues: -40.9627 51.6604 110.1540

8 C Isotropic = 52.0766 Anisotropy = 168.1106

XX= -31.6214 YX= -28.4703 ZX= -0.0000

XY= -27.5246 YY= 23.7009 ZY= 0.0000

XZ= 0.0000 YZ= 0.0000 ZZ= 164.1504

Eigenvalues: -43.3175 35.3970 164.1504

9 C Isotropic = 55.5472 Anisotropy = 168.9673

XX= -14.4124 YX= 25.6475 ZX= -0.0000

XY= 26.7314 YY= 12.8619 ZY= 0.0000

XZ= 0.0000 YZ= -0.0000 ZZ= 168.1921

Eigenvalues: -30.3025 28.7520 168.1921

10 C Isotropic = 3.9431 Anisotropy = 120.0812

XX= 13.2753 YX= -0.0035 ZX= -0.0000

XY= -0.0046 YY= -85.4432 ZY= 0.0000

XZ= -0.0000 YZ= 0.0000 ZZ= 83.9973

Eigenvalues: -85.4432 13.2753 83.9973

11 C Isotropic = 55.5461 Anisotropy = 168.9674

XX= -14.4189 YX= -25.6461 ZX= 0.0000

XY= -26.7294 YY= 12.8661 ZY= 0.0000

XZ= -0.0000 YZ= -0.0000 ZZ= 168.1910

Eigenvalues: -30.3046 28.7518 168.1910

12 C Isotropic = 52.0753 Anisotropy = 168.1082

XX= -31.6187 YX= 28.4747 ZX= 0.0000

XY= 27.5295 YY= 23.6971 ZY= 0.0000

S236



XZ= -0.0000 YZ= 0.0000 ZZ= 164.1474

Eigenvalues: -43.3191 35.3975 164.1474

13 C Isotropic = 31.8833 Anisotropy = 133.8335

XX= 121.1056 YX= -0.0013 ZX= 0.0082

XY= 0.0021 YY= -35.9409 ZY= -12.8727

XZ= 0.0020 YZ= -10.9252 ZZ= 10.4853

Eigenvalues: -38.8129 13.3573 121.1056

14 C Isotropic = 45.6633 Anisotropy = 144.0725

XX= 141.7116 YX= 0.0033 ZX= 0.0012

XY= 0.0027 YY= 16.9661 ZY= 4.5776

XZ= 0.0043 YZ= 5.1366 ZZ= -21.6879

Eigenvalues: -22.2888 17.5671 141.7116

15 S Isotropic = 257.0829 Anisotropy = 136.3820

XX= 348.0043 YX= 0.0057 ZX= 0.0050

XY= 0.0060 YY= 118.4180 ZY= 32.9938

XZ= 0.0042 YZ= -16.8338 ZZ= 304.8266

Eigenvalues: 118.0684 305.1762 348.0043

16 C Isotropic = 50.4658 Anisotropy = 180.1892

XX= 170.5919 YX= 0.0013 ZX= 0.0040

XY= 0.0028 YY= -18.3012 ZY= 38.8605

XZ= 0.0030 YZ= 37.0287 ZZ= -0.8934

Eigenvalues: -48.5274 29.3327 170.5919

17 C Isotropic = 28.3720 Anisotropy = 217.3149

XX= 173.2486 YX= 0.0036 ZX= 0.0017

XY= 0.0041 YY= -9.5437 ZY= -6.2660

XZ= 0.0054 YZ= -8.0777 ZZ= -78.5888

Eigenvalues: -79.3259 -8.8066 173.2486

18 C Isotropic = 42.9484 Anisotropy = 201.7566

XX= 177.4527 YX= 0.0062 ZX= 0.0048

XY= 0.0065 YY= -58.4002 ZY= -25.2555

XZ= 0.0041 YZ= -20.3289 ZZ= 9.7926

Eigenvalues: -65.3166 16.7090 177.4527

19 C Isotropic = 49.3494 Anisotropy = 182.3722

XX= 170.9308 YX= 0.0107 ZX= 0.0059  
XY= 0.0057 YY= -36.8562 ZY= 35.2301  
XZ= 0.0024 YZ= 34.5112 ZZ= 13.9734  
Eigenvalues: -54.5908 31.7081 170.9308

20 C Isotropic = 45.6633 Anisotropy = 144.0725

XX= 141.7116 YX= 0.0033 ZX= -0.0012  
XY= 0.0027 YY= 16.9661 ZY= -4.5776  
XZ= -0.0043 YZ= -5.1366 ZZ= -21.6879  
Eigenvalues: -22.2888 17.5671 141.7116

21 C Isotropic = 31.8833 Anisotropy = 133.8335

XX= 121.1056 YX= -0.0013 ZX= -0.0082  
XY= 0.0021 YY= -35.9409 ZY= 12.8727  
XZ= -0.0020 YZ= 10.9252 ZZ= 10.4853  
Eigenvalues: -38.8129 13.3573 121.1056

22 S Isotropic = 257.0829 Anisotropy = 136.3820

XX= 348.0043 YX= 0.0057 ZX= -0.0050  
XY= 0.0060 YY= 118.4180 ZY= -32.9938  
XZ= -0.0042 YZ= 16.8338 ZZ= 304.8266  
Eigenvalues: 118.0684 305.1762 348.0043

23 C Isotropic = 49.3494 Anisotropy = 182.3722

XX= 170.9308 YX= 0.0107 ZX= -0.0059  
XY= 0.0057 YY= -36.8562 ZY= -35.2301  
XZ= -0.0024 YZ= -34.5112 ZZ= 13.9734  
Eigenvalues: -54.5908 31.7081 170.9308

24 C Isotropic = 42.9484 Anisotropy = 201.7566

XX= 177.4527 YX= 0.0062 ZX= -0.0048  
XY= 0.0065 YY= -58.4002 ZY= 25.2555  
XZ= -0.0041 YZ= 20.3289 ZZ= 9.7926  
Eigenvalues: -65.3166 16.7090 177.4527

25 C Isotropic = 28.3720 Anisotropy = 217.3149

XX= 173.2486 YX= 0.0036 ZX= -0.0017  
XY= 0.0041 YY= -9.5437 ZY= 6.2660  
XZ= -0.0054 YZ= 8.0777 ZZ= -78.5888

Eigenvalues: -79.3259 -8.8066 173.2486

26 C Isotropic = 50.4658 Anisotropy = 180.1892

XX= 170.5919 YX= 0.0013 ZX= -0.0040

XY= 0.0028 YY= -18.3012 ZY= -38.8605

XZ= -0.0030 YZ= -37.0287 ZZ= -0.8934

Eigenvalues: -48.5274 29.3327 170.5919

27 F Isotropic = 247.4593 Anisotropy = 158.1882

XX= 138.1475 YX= 0.0057 ZX= -0.0000

XY= 0.0050 YY= 251.3123 ZY= 0.0000

XZ= -0.0000 YZ= 0.0000 ZZ= 352.9181

Eigenvalues: 138.1475 251.3123 352.9181

28 H Isotropic = 24.3206 Anisotropy = 9.4554

XX= 24.6129 YX= -6.8356 ZX= -0.0000

XY= -2.9307 YY= 26.6575 ZY= 0.0000

XZ= -0.0000 YZ= -0.0000 ZZ= 21.6913

Eigenvalues: 20.6462 21.6913 30.6241

29 H Isotropic = 23.8604 Anisotropy = 4.7176

XX= 24.0033 YX= -0.3332 ZX= -0.0000

XY= 1.1054 YY= 26.9558 ZY= 0.0000

XZ= -0.0000 YZ= 0.0000 ZZ= 20.6220

Eigenvalues: 20.6220 23.9536 27.0054

30 H Isotropic = 23.8604 Anisotropy = 4.7178

XX= 24.0032 YX= 0.3334 ZX= 0.0000

XY= -1.1053 YY= 26.9560 ZY= 0.0000

XZ= 0.0000 YZ= 0.0000 ZZ= 20.6221

Eigenvalues: 20.6221 23.9536 27.0056

31 H Isotropic = 24.3207 Anisotropy = 9.4556

XX= 24.6136 YX= 6.8359 ZX= 0.0000

XY= 2.9307 YY= 26.6572 ZY= 0.0000

XZ= 0.0000 YZ= -0.0000 ZZ= 21.6912

Eigenvalues: 20.6464 21.6912 30.6244

32 H Isotropic = 23.5691 Anisotropy = 8.8041

XX= 18.5420 YX= -0.0002 ZX= -0.0002

XY= -0.0001 YY= 23.9457 ZY= 2.3645

XZ= -0.0001 YZ= 2.8105 ZZ= 28.2196

Eigenvalues: 18.5420 22.7268 29.4385

33 H Isotropic = 23.0893 Anisotropy = 5.6620

XX= 19.5159 YX= -0.0002 ZX= -0.0003

XY= -0.0001 YY= 26.8635 ZY= -0.0912

XZ= -0.0000 YZ= 0.1802 ZZ= 22.8885

Eigenvalues: 19.5159 22.8880 26.8640

34 H Isotropic = 23.4109 Anisotropy = 5.7935

XX= 19.5273 YX= -0.0001 ZX= -0.0001

XY= -0.0000 YY= 23.4864 ZY= -0.5831

XZ= -0.0001 YZ= -0.3228 ZZ= 27.2191

Eigenvalues: 19.5273 23.4322 27.2733

35 H Isotropic = 22.9697 Anisotropy = 10.0549

XX= 17.1347 YX= -0.0006 ZX= -0.0006

XY= -0.0002 YY= 24.7282 ZY= 3.5123

XZ= -0.0002 YZ= 3.6956 ZZ= 27.0462

Eigenvalues: 17.1347 22.1015 29.6729

36 H Isotropic = 22.9697 Anisotropy = 10.0549

XX= 17.1347 YX= -0.0006 ZX= 0.0006

XY= -0.0002 YY= 24.7282 ZY= -3.5123

XZ= 0.0002 YZ= -3.6956 ZZ= 27.0462

Eigenvalues: 17.1347 22.1015 29.6729

37 H Isotropic = 23.4109 Anisotropy = 5.7935

XX= 19.5273 YX= -0.0001 ZX= 0.0001

XY= -0.0000 YY= 23.4864 ZY= 0.5831

XZ= 0.0001 YZ= 0.3228 ZZ= 27.2191

Eigenvalues: 19.5273 23.4322 27.2733

38 H Isotropic = 23.0893 Anisotropy = 5.6620

XX= 19.5159 YX= -0.0002 ZX= 0.0003

XY= -0.0001 YY= 26.8635 ZY= 0.0912

XZ= 0.0000 YZ= -0.1802 ZZ= 22.8885

Eigenvalues: 19.5159 22.8880 26.8640

39 H Isotropic = 23.5691 Anisotropy = 8.8041  
XX= 18.5420 YX= -0.0002 ZX= 0.0002  
XY= -0.0001 YY= 23.9457 ZY= -2.3645  
XZ= 0.0001 YZ= -2.8105 ZZ= 28.2196  
Eigenvalues: 18.5420 22.7268 29.4385

40 Bq Isotropic = 7.1225 Anisotropy = 16.0328  
XX= 17.6569 YX= 2.1039 ZX= -0.0000  
XY= 0.8979 YY= 3.1956 ZY= 0.0000  
XZ= -0.0000 YZ= -0.0000 ZZ= 0.5149  
Eigenvalues: 0.5149 3.0415 17.8111

41 Bq Isotropic = 5.9647 Anisotropy = 5.6131  
XX= 9.1378 YX= 0.7961 ZX= 0.4886  
XY= -3.0952 YY= 7.3796 ZY= 0.7770  
XZ= -0.3077 YZ= -0.7920 ZZ= 1.3766  
Eigenvalues: 1.3756 6.8117 9.7067

42 Bq Isotropic = 5.9647 Anisotropy = 5.6131  
XX= 9.1378 YX= 0.7961 ZX= -0.4886  
XY= -3.0952 YY= 7.3796 ZY= -0.7770  
XZ= 0.3077 YZ= 0.7920 ZZ= 1.3766  
Eigenvalues: 1.3756 6.8117 9.7067

43 Bq Isotropic = 8.2012 Anisotropy = 18.1615  
XX= 20.0676 YX= -0.7496 ZX= 2.1198  
XY= -1.0324 YY= 2.7736 ZY= -0.6816  
XZ= 1.6043 YZ= -1.0014 ZZ= 1.7625  
Eigenvalues: 1.2064 3.0884 20.3089

44 Bq Isotropic = 8.2012 Anisotropy = 18.1615  
XX= 20.0676 YX= -0.7496 ZX= -2.1198  
XY= -1.0324 YY= 2.7736 ZY= 0.6816  
XZ= -1.6043 YZ= 1.0014 ZZ= 1.7625  
Eigenvalues: 1.2064 3.0884 20.3089

6.32 Computed xyz-coordinates and GIAO nuclear magnetic shielding tensors of NICS(-1) calculation of compound **7**<sup>2+</sup> (Bq = ghost atom, B3LYP/6-311+G\*\*)

Charge = 2 Multiplicity = 1

|   |   |          |          |          |
|---|---|----------|----------|----------|
| C | 0 | -0.00006 | -1.44213 | 1.33375  |
| C | 0 | -0.00005 | -0.02803 | 1.18959  |
| N | 0 | -0.00004 | 0.61855  | 0.00000  |
| C | 0 | -0.00005 | -0.02803 | -1.18959 |
| C | 0 | -0.00006 | -1.44213 | -1.33375 |
| S | 0 | -0.00011 | -2.5084  | 0.00000  |
| C | 0 | 0.00002  | 2.08538  | 0.00000  |
| C | 0 | -1.22347 | 2.75205  | 0.00000  |
| C | 0 | -1.2208  | 4.14167  | 0.00000  |
| C | 0 | 0.00013  | 4.80285  | 0.00000  |
| C | 0 | 1.221    | 4.14156  | 0.00000  |
| C | 0 | 1.22357  | 2.75195  | 0.00000  |
| C | 0 | -0.00003 | -0.72656 | -3.56578 |
| C | 0 | -0.00004 | -1.84816 | -2.69951 |
| S | 0 | -0.00006 | 0.81796  | -2.69964 |
| C | 0 | 0.00000  | -0.87216 | -4.94475 |
| C | 0 | 0.00004  | -2.16779 | -5.46011 |
| C | 0 | 0.00005  | -3.29387 | -4.61916 |
| C | 0 | 0.00001  | -3.14786 | -3.24558 |
| C | 0 | -0.00004 | -1.84816 | 2.69951  |
| C | 0 | -0.00003 | -0.72656 | 3.56578  |
| S | 0 | -0.00006 | 0.81796  | 2.69964  |
| C | 0 | 0.00001  | -3.14786 | 3.24558  |
| C | 0 | 0.00005  | -3.29387 | 4.61916  |
| C | 0 | 0.00004  | -2.16779 | 5.46011  |
| C | 0 | 0.00000  | -0.87216 | 4.94475  |
| F | 0 | 0.00019  | 6.14827  | 0.00000  |
| H | 0 | -2.15515 | 2.20044  | 0.00000  |

|    |   |          |          |          |
|----|---|----------|----------|----------|
| H  | 0 | -2.14496 | 4.70407  | 0.00000  |
| H  | 0 | 2.14521  | 4.7039   | 0.00000  |
| H  | 0 | 2.1552   | 2.20026  | 0.00000  |
| H  | 0 | 0.00000  | -0.01459 | -5.60478 |
| H  | 0 | 0.00006  | -2.3055  | -6.5343  |
| H  | 0 | 0.00008  | -4.28484 | -5.05405 |
| H  | 0 | 0.00003  | -4.01865 | -2.60198 |
| H  | 0 | 0.00003  | -4.01865 | 2.60198  |
| H  | 0 | 0.00008  | -4.28484 | 5.05405  |
| H  | 0 | 0.00006  | -2.3055  | 6.5343   |
| H  | 0 | 0.00000  | -0.01459 | 5.60478  |
| Bq | 0 | -1.00006 | -0.80502 | 0.00000  |
| Bq | 0 | -1.00005 | -0.64539 | 2.29767  |
| Bq | 0 | -1.00005 | -0.64539 | -2.29767 |
| Bq | 0 | -1.00000 | -2.00942 | 4.08917  |
| Bq | 0 | -1.00000 | -2.00942 | -4.08917 |

Calculating GIAO nuclear magnetic shielding tensors.

SCF GIAO Magnetic shielding tensor (ppm):

1 C Isotropic = 31.6297 Anisotropy = 155.5934

XX= 135.3586 YX= 0.0030 ZX= 0.0000

XY= -0.0008 YY= -20.8366 ZY= 28.4124

XZ= -0.0034 YZ= 17.3730 ZZ= -19.6329

Eigenvalues: -43.1353 2.6659 135.3586

2 C Isotropic = 14.9744 Anisotropy = 135.9760

XX= 105.6251 YX= 0.0011 ZX= -0.0017

XY= -0.0011 YY= -34.3519 ZY= 13.6703

XZ= 0.0017 YZ= 19.5442 ZZ= -26.3500

Eigenvalues: -47.4334 -13.2686 105.6251

3 N Isotropic = 18.1822 Anisotropy = 252.4910

XX= 186.5096 YX= 0.0012 ZX= 0.0000

XY= -0.0076 YY= -91.3892 ZY= 0.0000

XZ= -0.0000 YZ= 0.0000 ZZ= -40.5738

Eigenvalues: -91.3892 -40.5738 186.5096

4 C Isotropic = 14.9744 Anisotropy = 135.9760  
XX= 105.6251 YX= 0.0011 ZX= 0.0017  
XY= -0.0011 YY= -34.3520 ZY= -13.6703  
XZ= -0.0017 YZ= -19.5442 ZZ= -26.3500  
Eigenvalues: -47.4334 -13.2686 105.6251

5 C Isotropic = 31.6297 Anisotropy = 155.5934  
XX= 135.3586 YX= 0.0030 ZX= -0.0000  
XY= -0.0008 YY= -20.8366 ZY= -28.4124  
XZ= 0.0034 YZ= -17.3730 ZZ= -19.6329  
Eigenvalues: -43.1353 2.6659 135.3586

6 S Isotropic = 227.0636 Anisotropy = 454.4424  
XX= 530.0252 YX= 0.0039 ZX= -0.0000  
XY= -0.0147 YY= 49.7176 ZY= 0.0000  
XZ= 0.0000 YZ= -0.0000 ZZ= 101.4480  
Eigenvalues: 49.7176 101.4480 530.0252

7 C Isotropic = 40.2839 Anisotropy = 104.8051  
XX= 51.6604 YX= -0.0035 ZX= 0.0000  
XY= -0.0038 YY= -40.9627 ZY= 0.0000  
XZ= -0.0000 YZ= -0.0000 ZZ= 110.1540  
Eigenvalues: -40.9627 51.6604 110.1540

8 C Isotropic = 52.0766 Anisotropy = 168.1106  
XX= -31.6214 YX= -28.4703 ZX= -0.0000  
XY= -27.5246 YY= 23.7009 ZY= 0.0000  
XZ= 0.0000 YZ= 0.0000 ZZ= 164.1504  
Eigenvalues: -43.3175 35.3970 164.1504

9 C Isotropic = 55.5472 Anisotropy = 168.9673  
XX= -14.4124 YX= 25.6475 ZX= -0.0000  
XY= 26.7314 YY= 12.8619 ZY= 0.0000  
XZ= 0.0000 YZ= -0.0000 ZZ= 168.1921  
Eigenvalues: -30.3025 28.7520 168.1921

10 C Isotropic = 3.9431 Anisotropy = 120.0812  
XX= 13.2753 YX= -0.0035 ZX= -0.0000  
XY= -0.0046 YY= -85.4432 ZY= 0.0000  
Eigenvalues: 3.9431 -85.4432 120.0812



XZ= -0.0000 YZ= 0.0000 ZZ= 83.9973

Eigenvalues: -85.4432 13.2753 83.9973

11 C Isotropic = 55.5461 Anisotropy = 168.9674

XX= -14.4189 YX= -25.6461 ZX= 0.0000

XY= -26.7294 YY= 12.8661 ZY= 0.0000

XZ= -0.0000 YZ= -0.0000 ZZ= 168.1910

Eigenvalues: -30.3046 28.7518 168.1910

12 C Isotropic = 52.0753 Anisotropy = 168.1082

XX= -31.6187 YX= 28.4747 ZX= 0.0000

XY= 27.5295 YY= 23.6971 ZY= 0.0000

XZ= -0.0000 YZ= 0.0000 ZZ= 164.1474

Eigenvalues: -43.3191 35.3975 164.1474

13 C Isotropic = 31.8833 Anisotropy = 133.8335

XX= 121.1056 YX= -0.0013 ZX= 0.0082

XY= 0.0021 YY= -35.9409 ZY= -12.8727

XZ= 0.0020 YZ= -10.9252 ZZ= 10.4853

Eigenvalues: -38.8129 13.3573 121.1056

14 C Isotropic = 45.6633 Anisotropy = 144.0725

XX= 141.7116 YX= 0.0033 ZX= 0.0012

XY= 0.0027 YY= 16.9661 ZY= 4.5776

XZ= 0.0043 YZ= 5.1366 ZZ= -21.6879

Eigenvalues: -22.2888 17.5671 141.7116

15 S Isotropic = 257.0829 Anisotropy = 136.3820

XX= 348.0043 YX= 0.0057 ZX= 0.0050

XY= 0.0060 YY= 118.4180 ZY= 32.9938

XZ= 0.0042 YZ= -16.8338 ZZ= 304.8266

Eigenvalues: 118.0684 305.1762 348.0043

16 C Isotropic = 50.4658 Anisotropy = 180.1892

XX= 170.5919 YX= 0.0013 ZX= 0.0040

XY= 0.0028 YY= -18.3012 ZY= 38.8605

XZ= 0.0030 YZ= 37.0287 ZZ= -0.8934

Eigenvalues: -48.5274 29.3327 170.5919

17 C Isotropic = 28.3720 Anisotropy = 217.3149

XX= 173.2486 YX= 0.0036 ZX= 0.0017  
XY= 0.0041 YY= -9.5437 ZY= -6.2660  
XZ= 0.0054 YZ= -8.0777 ZZ= -78.5888  
Eigenvalues: -79.3259 -8.8066 173.2486

18 C Isotropic = 42.9484 Anisotropy = 201.7566

XX= 177.4527 YX= 0.0062 ZX= 0.0048  
XY= 0.0065 YY= -58.4002 ZY= -25.2555  
XZ= 0.0041 YZ= -20.3289 ZZ= 9.7926  
Eigenvalues: -65.3166 16.7090 177.4527

19 C Isotropic = 49.3494 Anisotropy = 182.3722

XX= 170.9308 YX= 0.0107 ZX= 0.0059  
XY= 0.0057 YY= -36.8562 ZY= 35.2301  
XZ= 0.0024 YZ= 34.5112 ZZ= 13.9734  
Eigenvalues: -54.5908 31.7081 170.9308

20 C Isotropic = 45.6633 Anisotropy = 144.0725

XX= 141.7116 YX= 0.0033 ZX= -0.0012  
XY= 0.0027 YY= 16.9661 ZY= -4.5776  
XZ= -0.0043 YZ= -5.1366 ZZ= -21.6879  
Eigenvalues: -22.2888 17.5671 141.7116

21 C Isotropic = 31.8833 Anisotropy = 133.8335

XX= 121.1056 YX= -0.0013 ZX= -0.0082  
XY= 0.0021 YY= -35.9409 ZY= 12.8727  
XZ= -0.0020 YZ= 10.9252 ZZ= 10.4853  
Eigenvalues: -38.8129 13.3573 121.1056

22 S Isotropic = 257.0829 Anisotropy = 136.3820

XX= 348.0043 YX= 0.0057 ZX= -0.0050  
XY= 0.0060 YY= 118.4180 ZY= -32.9938  
XZ= -0.0042 YZ= 16.8338 ZZ= 304.8266  
Eigenvalues: 118.0684 305.1762 348.0043

23 C Isotropic = 49.3494 Anisotropy = 182.3722

XX= 170.9308 YX= 0.0107 ZX= -0.0059  
XY= 0.0057 YY= -36.8562 ZY= -35.2301  
XZ= -0.0024 YZ= -34.5112 ZZ= 13.9734

Eigenvalues: -54.5908 31.7081 170.9308

24 C Isotropic = 42.9484 Anisotropy = 201.7566

XX= 177.4527 YX= 0.0062 ZX= -0.0048

XY= 0.0065 YY= -58.4002 ZY= 25.2555

XZ= -0.0041 YZ= 20.3289 ZZ= 9.7926

Eigenvalues: -65.3166 16.7090 177.4527

25 C Isotropic = 28.3720 Anisotropy = 217.3149

XX= 173.2486 YX= 0.0036 ZX= -0.0017

XY= 0.0041 YY= -9.5437 ZY= 6.2660

XZ= -0.0054 YZ= 8.0777 ZZ= -78.5888

Eigenvalues: -79.3259 -8.8066 173.2486

26 C Isotropic = 50.4658 Anisotropy = 180.1892

XX= 170.5919 YX= 0.0013 ZX= -0.0040

XY= 0.0028 YY= -18.3012 ZY= -38.8605

XZ= -0.0030 YZ= -37.0287 ZZ= -0.8934

Eigenvalues: -48.5274 29.3327 170.5919

27 F Isotropic = 247.4593 Anisotropy = 158.1882

XX= 138.1475 YX= 0.0057 ZX= -0.0000

XY= 0.0050 YY= 251.3123 ZY= 0.0000

XZ= -0.0000 YZ= 0.0000 ZZ= 352.9181

Eigenvalues: 138.1475 251.3123 352.9181

28 H Isotropic = 24.3206 Anisotropy = 9.4554

XX= 24.6129 YX= -6.8356 ZX= -0.0000

XY= -2.9307 YY= 26.6575 ZY= 0.0000

XZ= -0.0000 YZ= -0.0000 ZZ= 21.6913

Eigenvalues: 20.6462 21.6913 30.6241

29 H Isotropic = 23.8604 Anisotropy = 4.7176

XX= 24.0033 YX= -0.3332 ZX= -0.0000

XY= 1.1054 YY= 26.9558 ZY= 0.0000

XZ= -0.0000 YZ= 0.0000 ZZ= 20.6220

Eigenvalues: 20.6220 23.9536 27.0054

30 H Isotropic = 23.8604 Anisotropy = 4.7178

XX= 24.0032 YX= 0.3334 ZX= 0.0000

XY= -1.1053 YY= 26.9560 ZY= 0.0000  
XZ= 0.0000 YZ= 0.0000 ZZ= 20.6221

Eigenvalues: 20.6221 23.9536 27.0056

31 H Isotropic = 24.3207 Anisotropy = 9.4556

XX= 24.6136 YX= 6.8359 ZX= 0.0000  
XY= 2.9307 YY= 26.6572 ZY= 0.0000  
XZ= 0.0000 YZ= -0.0000 ZZ= 21.6912

Eigenvalues: 20.6464 21.6912 30.6244

32 H Isotropic = 23.5691 Anisotropy = 8.8041

XX= 18.5420 YX= -0.0002 ZX= -0.0002  
XY= -0.0001 YY= 23.9457 ZY= 2.3645  
XZ= -0.0001 YZ= 2.8105 ZZ= 28.2196

Eigenvalues: 18.5420 22.7268 29.4385

33 H Isotropic = 23.0893 Anisotropy = 5.6620

XX= 19.5159 YX= -0.0002 ZX= -0.0003  
XY= -0.0001 YY= 26.8635 ZY= -0.0912  
XZ= -0.0000 YZ= 0.1802 ZZ= 22.8885

Eigenvalues: 19.5159 22.8880 26.8640

34 H Isotropic = 23.4109 Anisotropy = 5.7935

XX= 19.5273 YX= -0.0001 ZX= -0.0001  
XY= -0.0000 YY= 23.4864 ZY= -0.5831  
XZ= -0.0001 YZ= -0.3228 ZZ= 27.2191

Eigenvalues: 19.5273 23.4322 27.2733

35 H Isotropic = 22.9697 Anisotropy = 10.0549

XX= 17.1347 YX= -0.0006 ZX= -0.0006  
XY= -0.0002 YY= 24.7282 ZY= 3.5123  
XZ= -0.0002 YZ= 3.6956 ZZ= 27.0462

Eigenvalues: 17.1347 22.1015 29.6729

36 H Isotropic = 22.9697 Anisotropy = 10.0549

XX= 17.1347 YX= -0.0006 ZX= 0.0006  
XY= -0.0002 YY= 24.7282 ZY= -3.5123  
XZ= 0.0002 YZ= -3.6956 ZZ= 27.0462

Eigenvalues: 17.1347 22.1015 29.6729

37 H Isotropic = 23.4109 Anisotropy = 5.7935  
XX= 19.5273 YX= -0.0001 ZX= 0.0001  
XY= -0.0000 YY= 23.4864 ZY= 0.5831  
XZ= 0.0001 YZ= 0.3228 ZZ= 27.2191  
Eigenvalues: 19.5273 23.4322 27.2733

38 H Isotropic = 23.0893 Anisotropy = 5.6620  
XX= 19.5159 YX= -0.0002 ZX= 0.0003  
XY= -0.0001 YY= 26.8635 ZY= 0.0912  
XZ= 0.0000 YZ= -0.1802 ZZ= 22.8885  
Eigenvalues: 19.5159 22.8880 26.8640

39 H Isotropic = 23.5691 Anisotropy = 8.8041  
XX= 18.5420 YX= -0.0002 ZX= 0.0002  
XY= -0.0001 YY= 23.9457 ZY= -2.3645  
XZ= 0.0001 YZ= -2.8105 ZZ= 28.2196  
Eigenvalues: 18.5420 22.7268 29.4385

40 Bq Isotropic = 7.1226 Anisotropy = 16.0334  
XX= 17.6573 YX= -2.1050 ZX= -0.0000  
XY= -0.8978 YY= 3.1959 ZY= -0.0000  
XZ= -0.0000 YZ= 0.0000 ZZ= 0.5146  
Eigenvalues: 0.5146 3.0417 17.8115

41 Bq Isotropic = 5.9644 Anisotropy = 5.6131  
XX= 9.1375 YX= -0.7957 ZX= -0.4891  
XY= 3.0948 YY= 7.3795 ZY= 0.7776  
XZ= 0.3075 YZ= -0.7912 ZZ= 1.3762  
Eigenvalues: 1.3751 6.8116 9.7065

42 Bq Isotropic = 5.9644 Anisotropy = 5.6131  
XX= 9.1375 YX= -0.7957 ZX= 0.4891  
XY= 3.0948 YY= 7.3795 ZY= -0.7776  
XZ= -0.3075 YZ= 0.7912 ZZ= 1.3762  
Eigenvalues: 1.3751 6.8116 9.7065

43 Bq Isotropic = 8.2010 Anisotropy = 18.1611  
XX= 20.0669 YX= 0.7504 ZX= -2.1200  
XY= 1.0329 YY= 2.7734 ZY= -0.6818

XZ= -1.6050 YZ= -1.0014 ZZ= 1.7627

Eigenvalues: 1.2064 3.0881 20.3084

44 Bq Isotropic = 8.2010 Anisotropy = 18.1611

XX= 20.0669 YX= 0.7504 ZX= 2.1201

XY= 1.0329 YY= 2.7734 ZY= 0.6818

XZ= 1.6050 YZ= 1.0014 ZZ= 1.7627

Eigenvalues: 1.2064 3.0881 20.3084

## 7 References

- [1] A. P. W. Schneeweis, S. T. Hauer, G. J. Reiss and T. J. J. Müller, *Chem. Eur. J.*, 2019, **25**, 3582-3590.
- [2] Y. Ren and T. Baumgartner, *Chem. Asian J.*, 2010, **5**, 1918-1929.
- [3] T. Yamamoto, S. Ogawa and R. Sato, *Tetrahedron Lett.*, 2004, **45**, 7943-7946.
- [4] R. P. Dickinson and B. Iddon, *J. Chem. Soc. C*, 1968, 2733-2737.
- [5] M. Krejčík, M. Daněk and F. Hartl, *J. Electroanal. Chem. Interfacial Electrochem.* 1991, **317**, 179–187.
- [6] S. Stoll and A. Schweiger, *J. Magn. Reson.* 2006, **178**, 42–55.
- [7] Gaussian 09, Revision A.02, M. J. Frisch, G. W. Trucks, H. B. Schlegel, G. E. Scuseria, M. A. Robb, J. R. Cheeseman, G. Scalmani, V. Barone, B. Mennucci, G. A. Petersson, H. Nakatsuji, M. Caricato, X. Li, H. P. Hratchian, A. F. Izmaylov, J. Bloino, G. Zheng, J. L. Sonnenberg, M. Hada, M. Ehara, K. Toyota, R. Fukuda, J. Hasegawa, M. Ishida, T. Nakajima, Y. Honda, O. Kitao, H. Nakai, T. Vreven, J. J. A. Montgomery, J. E. Peralta, F. Ogliaro, M. Bearpark, J. J. Heyd, E. Brothers, K. N. Kudin, V. N. Staroverov, R. Kobayashi, J. Normand, K. Raghavachari, A. Rendell, J. C. Burant, S. S. Iyengar, J. Tomasi, M. Cossi, N. Rega, J. M. Millam, M. Klene, J. E. Knox, J. B. Cross, V. Bakken, C. Adamo, J. Jaramillo, R. Gomperts, R. E. Stratmann, O. Yazyev, A. J. Austin, R. Cammi, C. Pomelli, J. W. Ochterski, R. L. Martin, K. Morokuma, V. G. Zakrzewski, G. A. Voth, P. Salvador, J. J. Dannenberg, S. Dapprich, A. D. Daniels, O. Farkas, J. B. Foresman, J. V. Ortiz, J. Cioslowski and D. J. Fox, Gaussian, Inc., Wallingford CT, 2009.
- [8] T. Lu and F. Chen, *J. Comput. Chem.*, 2012, **33**, 580-592.
